# Supplementary material for: Snack Preferences among School-Aged Children: Evidence from Discrete Choice Experiments
Source: Research Square preprint supplement (doi:10.21203/rs.3.rs-8374757/v1), 2026-01-20
Supplement: Supplementary file 1 [file 456749a68f7795b40a07242a.docx]

# **Supplementary file 2:**

# Snack Preference Questionnaire Survey(Version 1）

**Instructions:**

# Target: Snack A vs. Snack B

# Scenario: Before eating a snack

# Dear Student,

# Hello! This questionnaire aims to understand preferences in snack choices. We expect you to select which snack you would prefer from the following choice sets and indicate whether you would actually eat this snack in real life by ticking the corresponding box☑.

# If you happen to like both snacks, please select the one you prefer more and check "Yes" for the option "Considering your daily diet, would you eat this snack in real life?"

# If you do not like either snack, please select the one that is relatively more acceptable to you and check "No" for the option "Considering your daily diet, would you eat this snack in real life?"

# The snacks in this questionnaire are hypothetical and may not exist in reality. Please answer based on your true thoughts. There are no right or wrong answers; your choices represent your personal perspective.

# This questionnaire consists of 8 choice sets. Please answer them one by one.

# Each choice set is independent.

# Please base your selection primarily on the text description; images are for reference only.

Choice Set 1/8

| Snack Attributes | Snack A | | Snack B | |
| --- | --- | --- | --- | --- |
| Taste | Savory  Flavor | 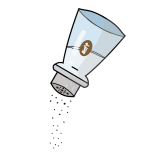 | Spicy  Flavor | 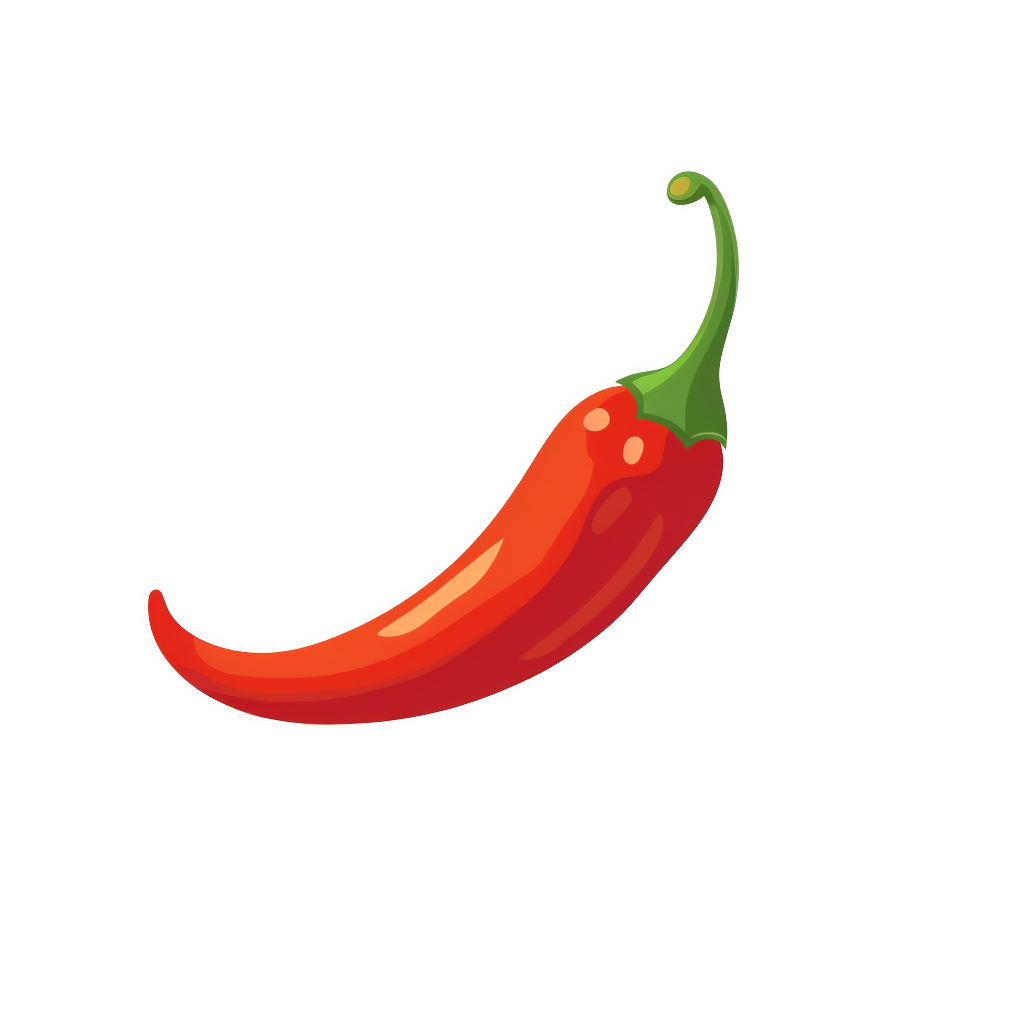 |
| Nutrient Claims | Low Fat | 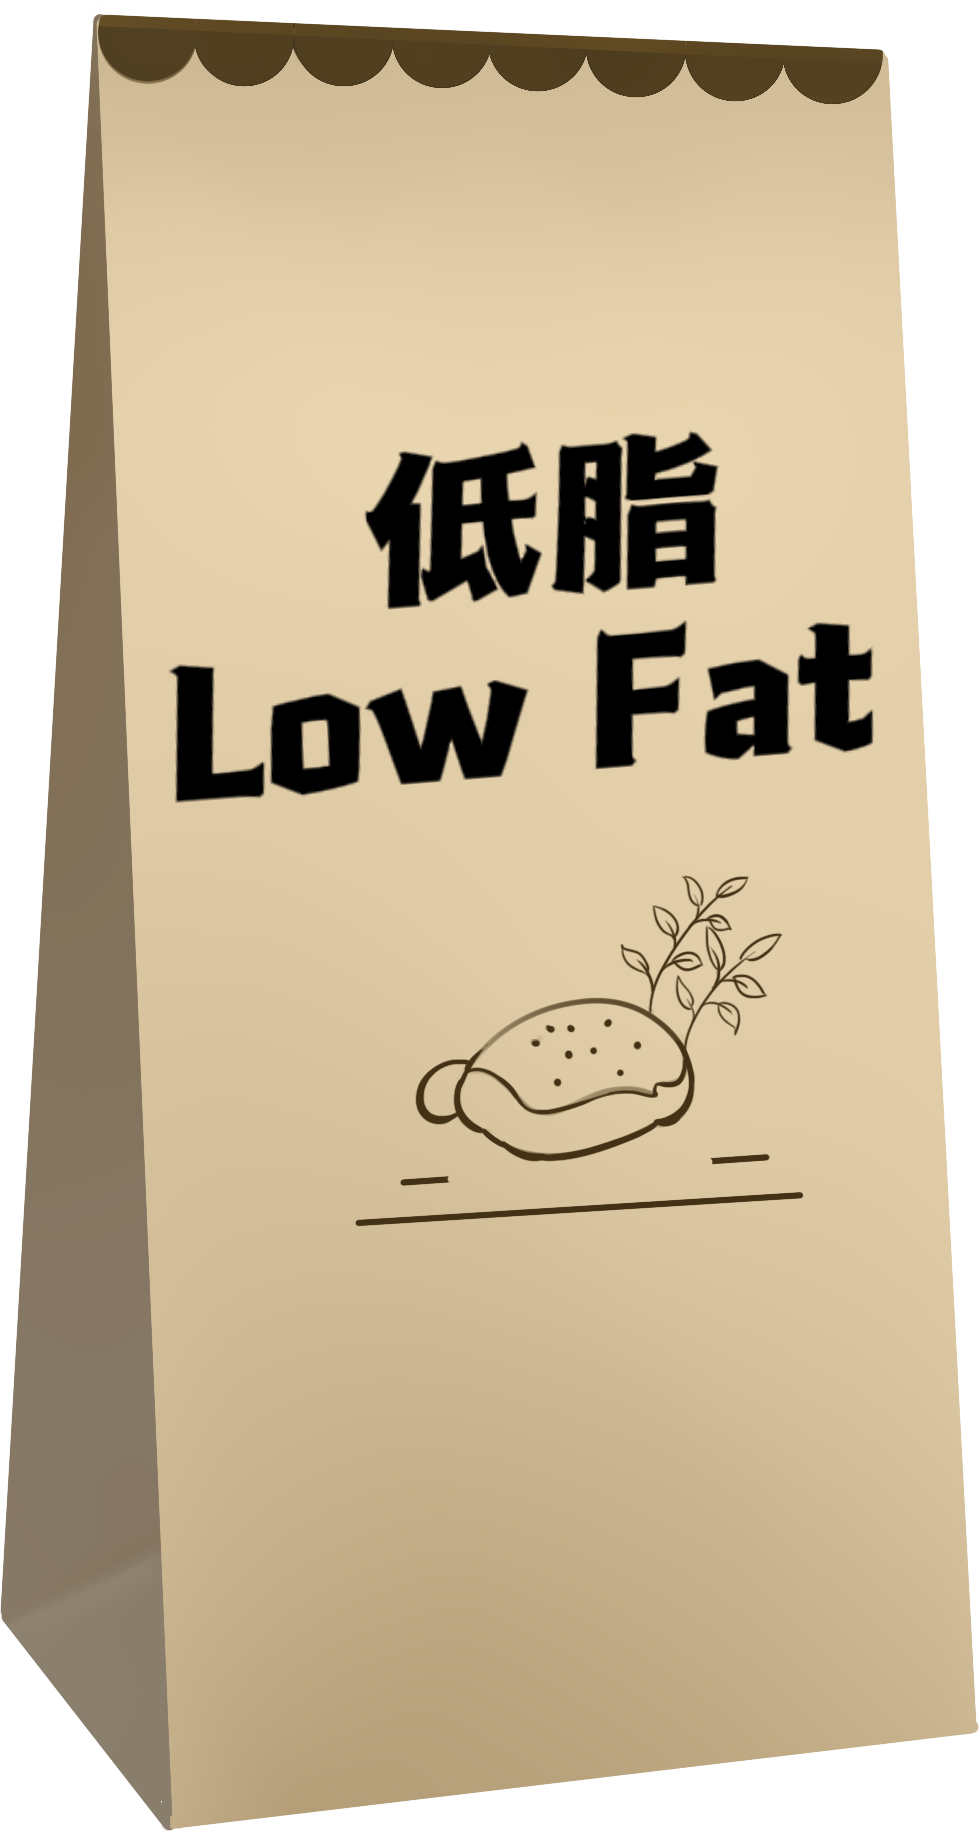 | Rich Minerals/  Vitamins | 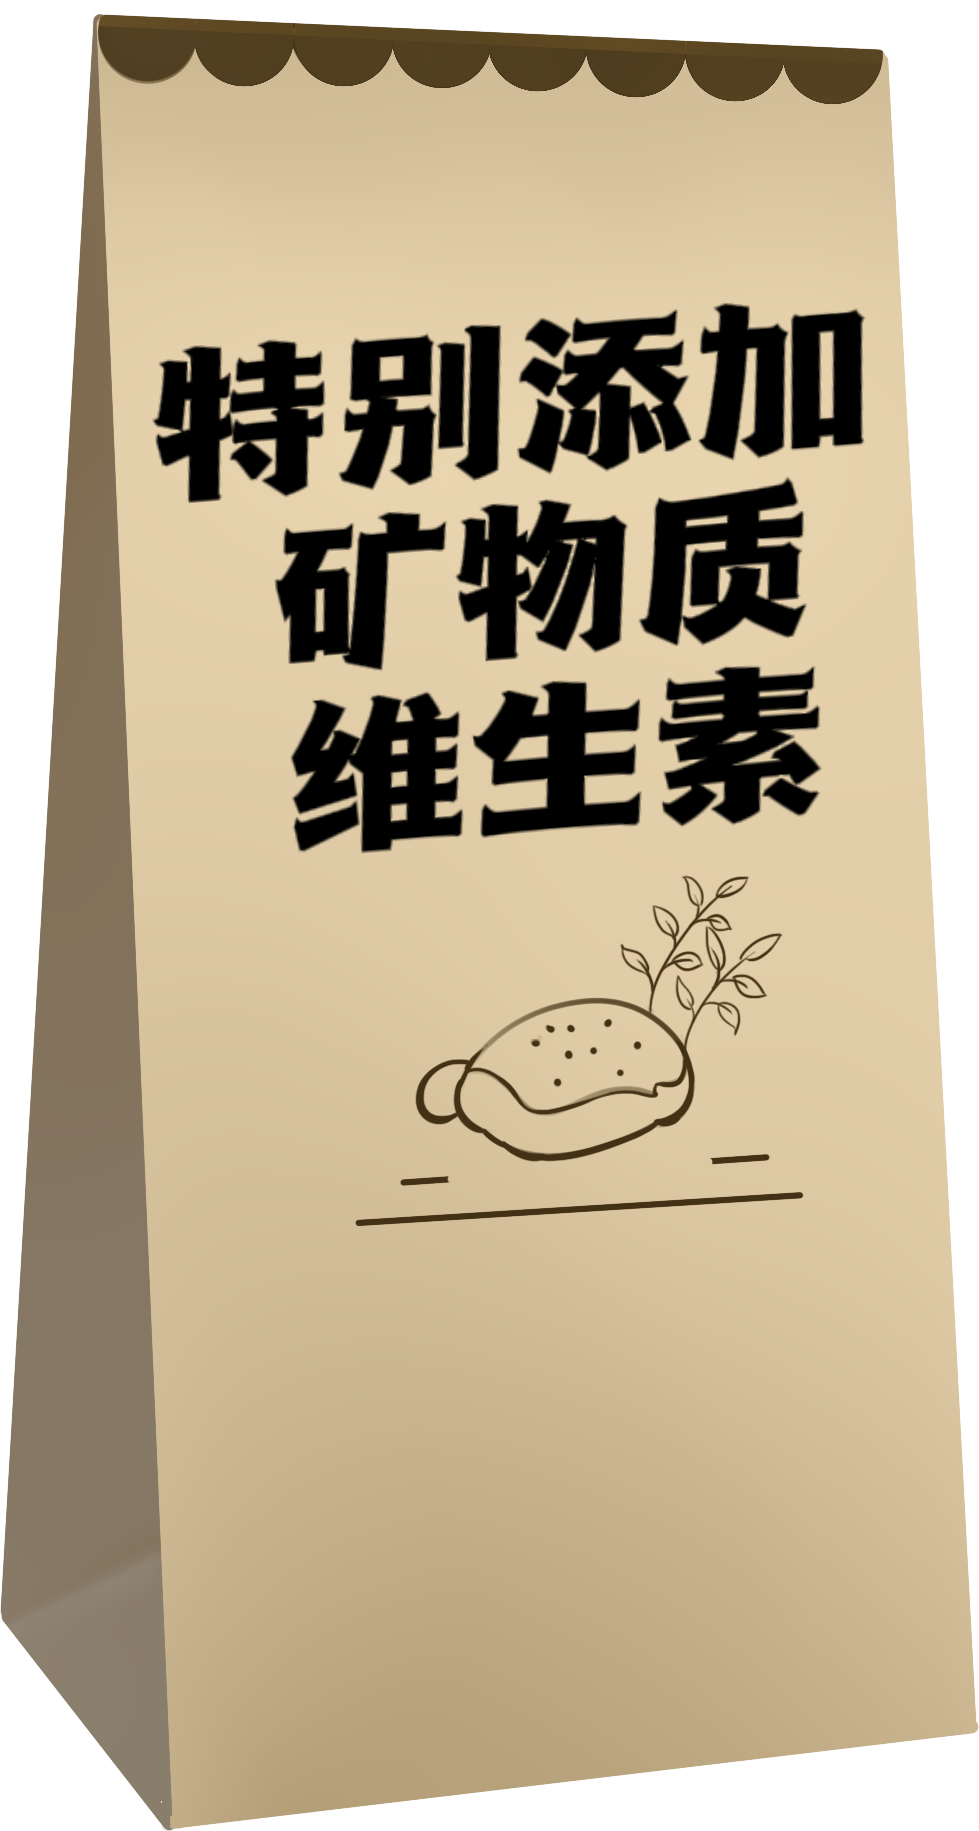 |
| Purchase Location | Convenience  Store | 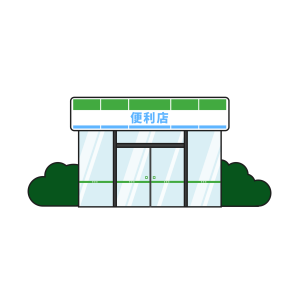 | Supermarket/  Hypermarket | 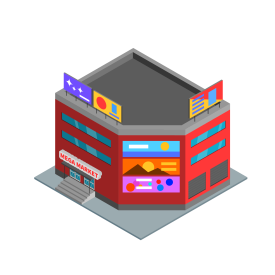 |
| Price | 5~9 ¥CNY | 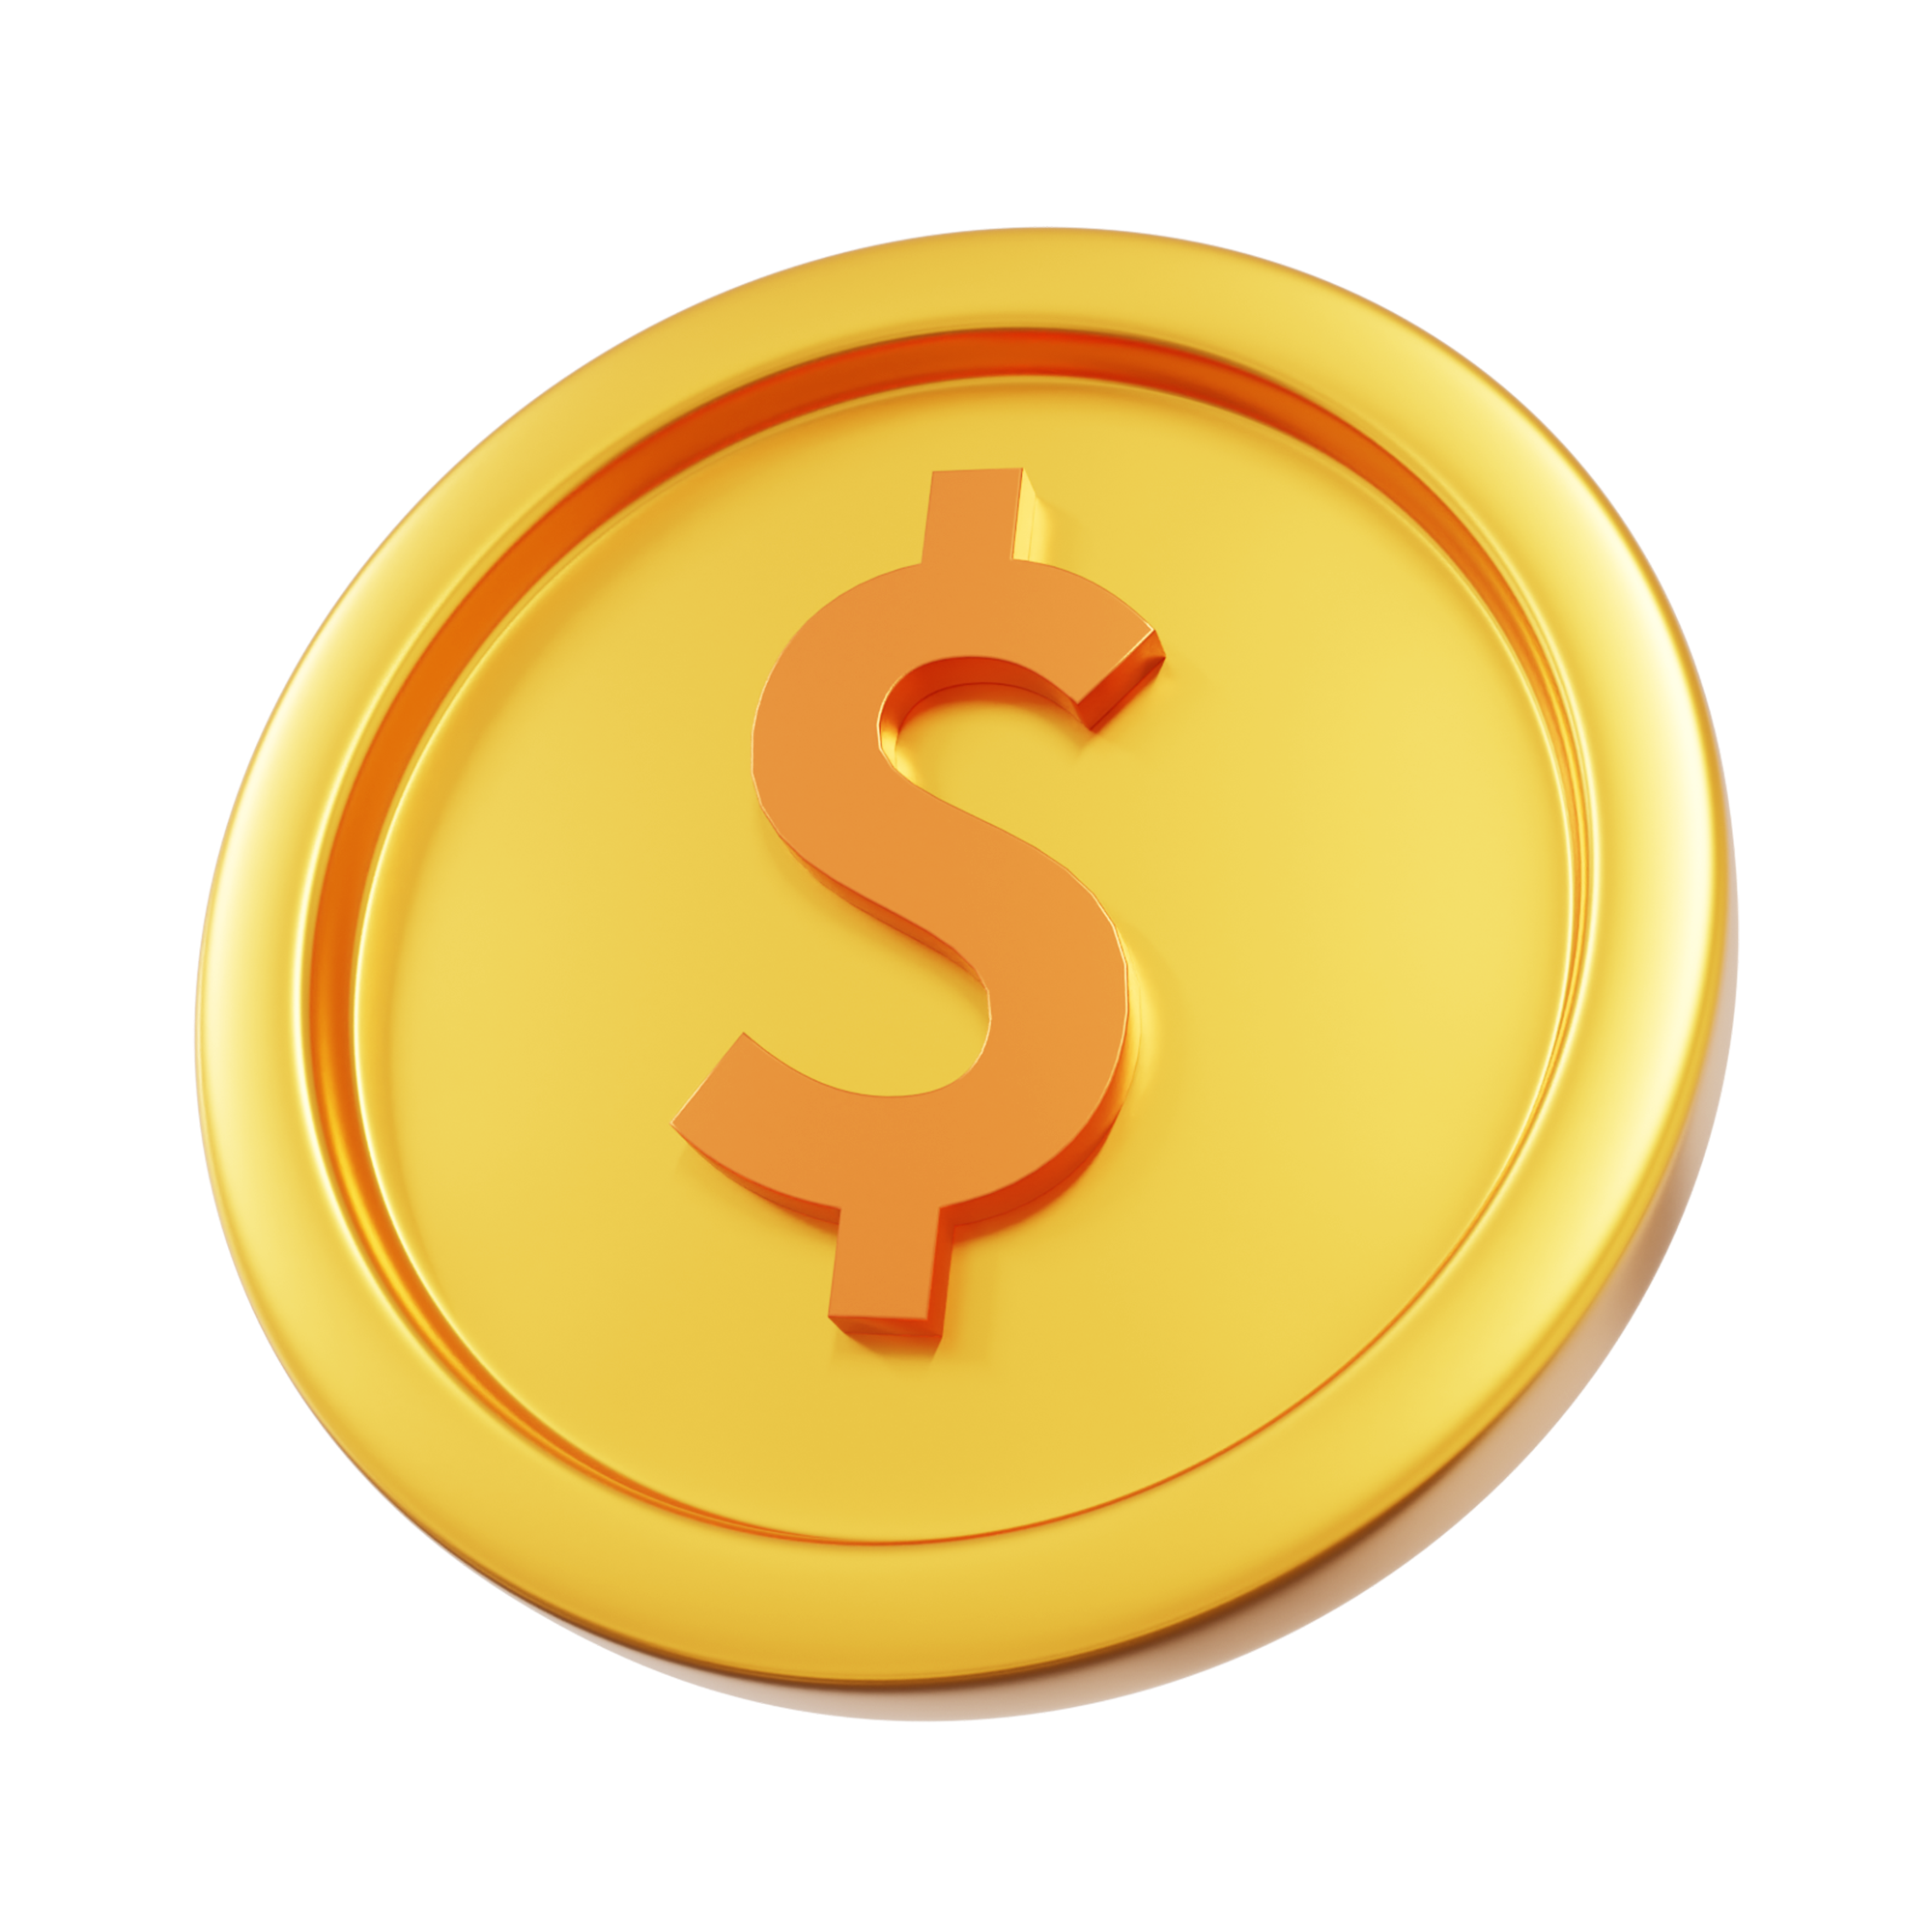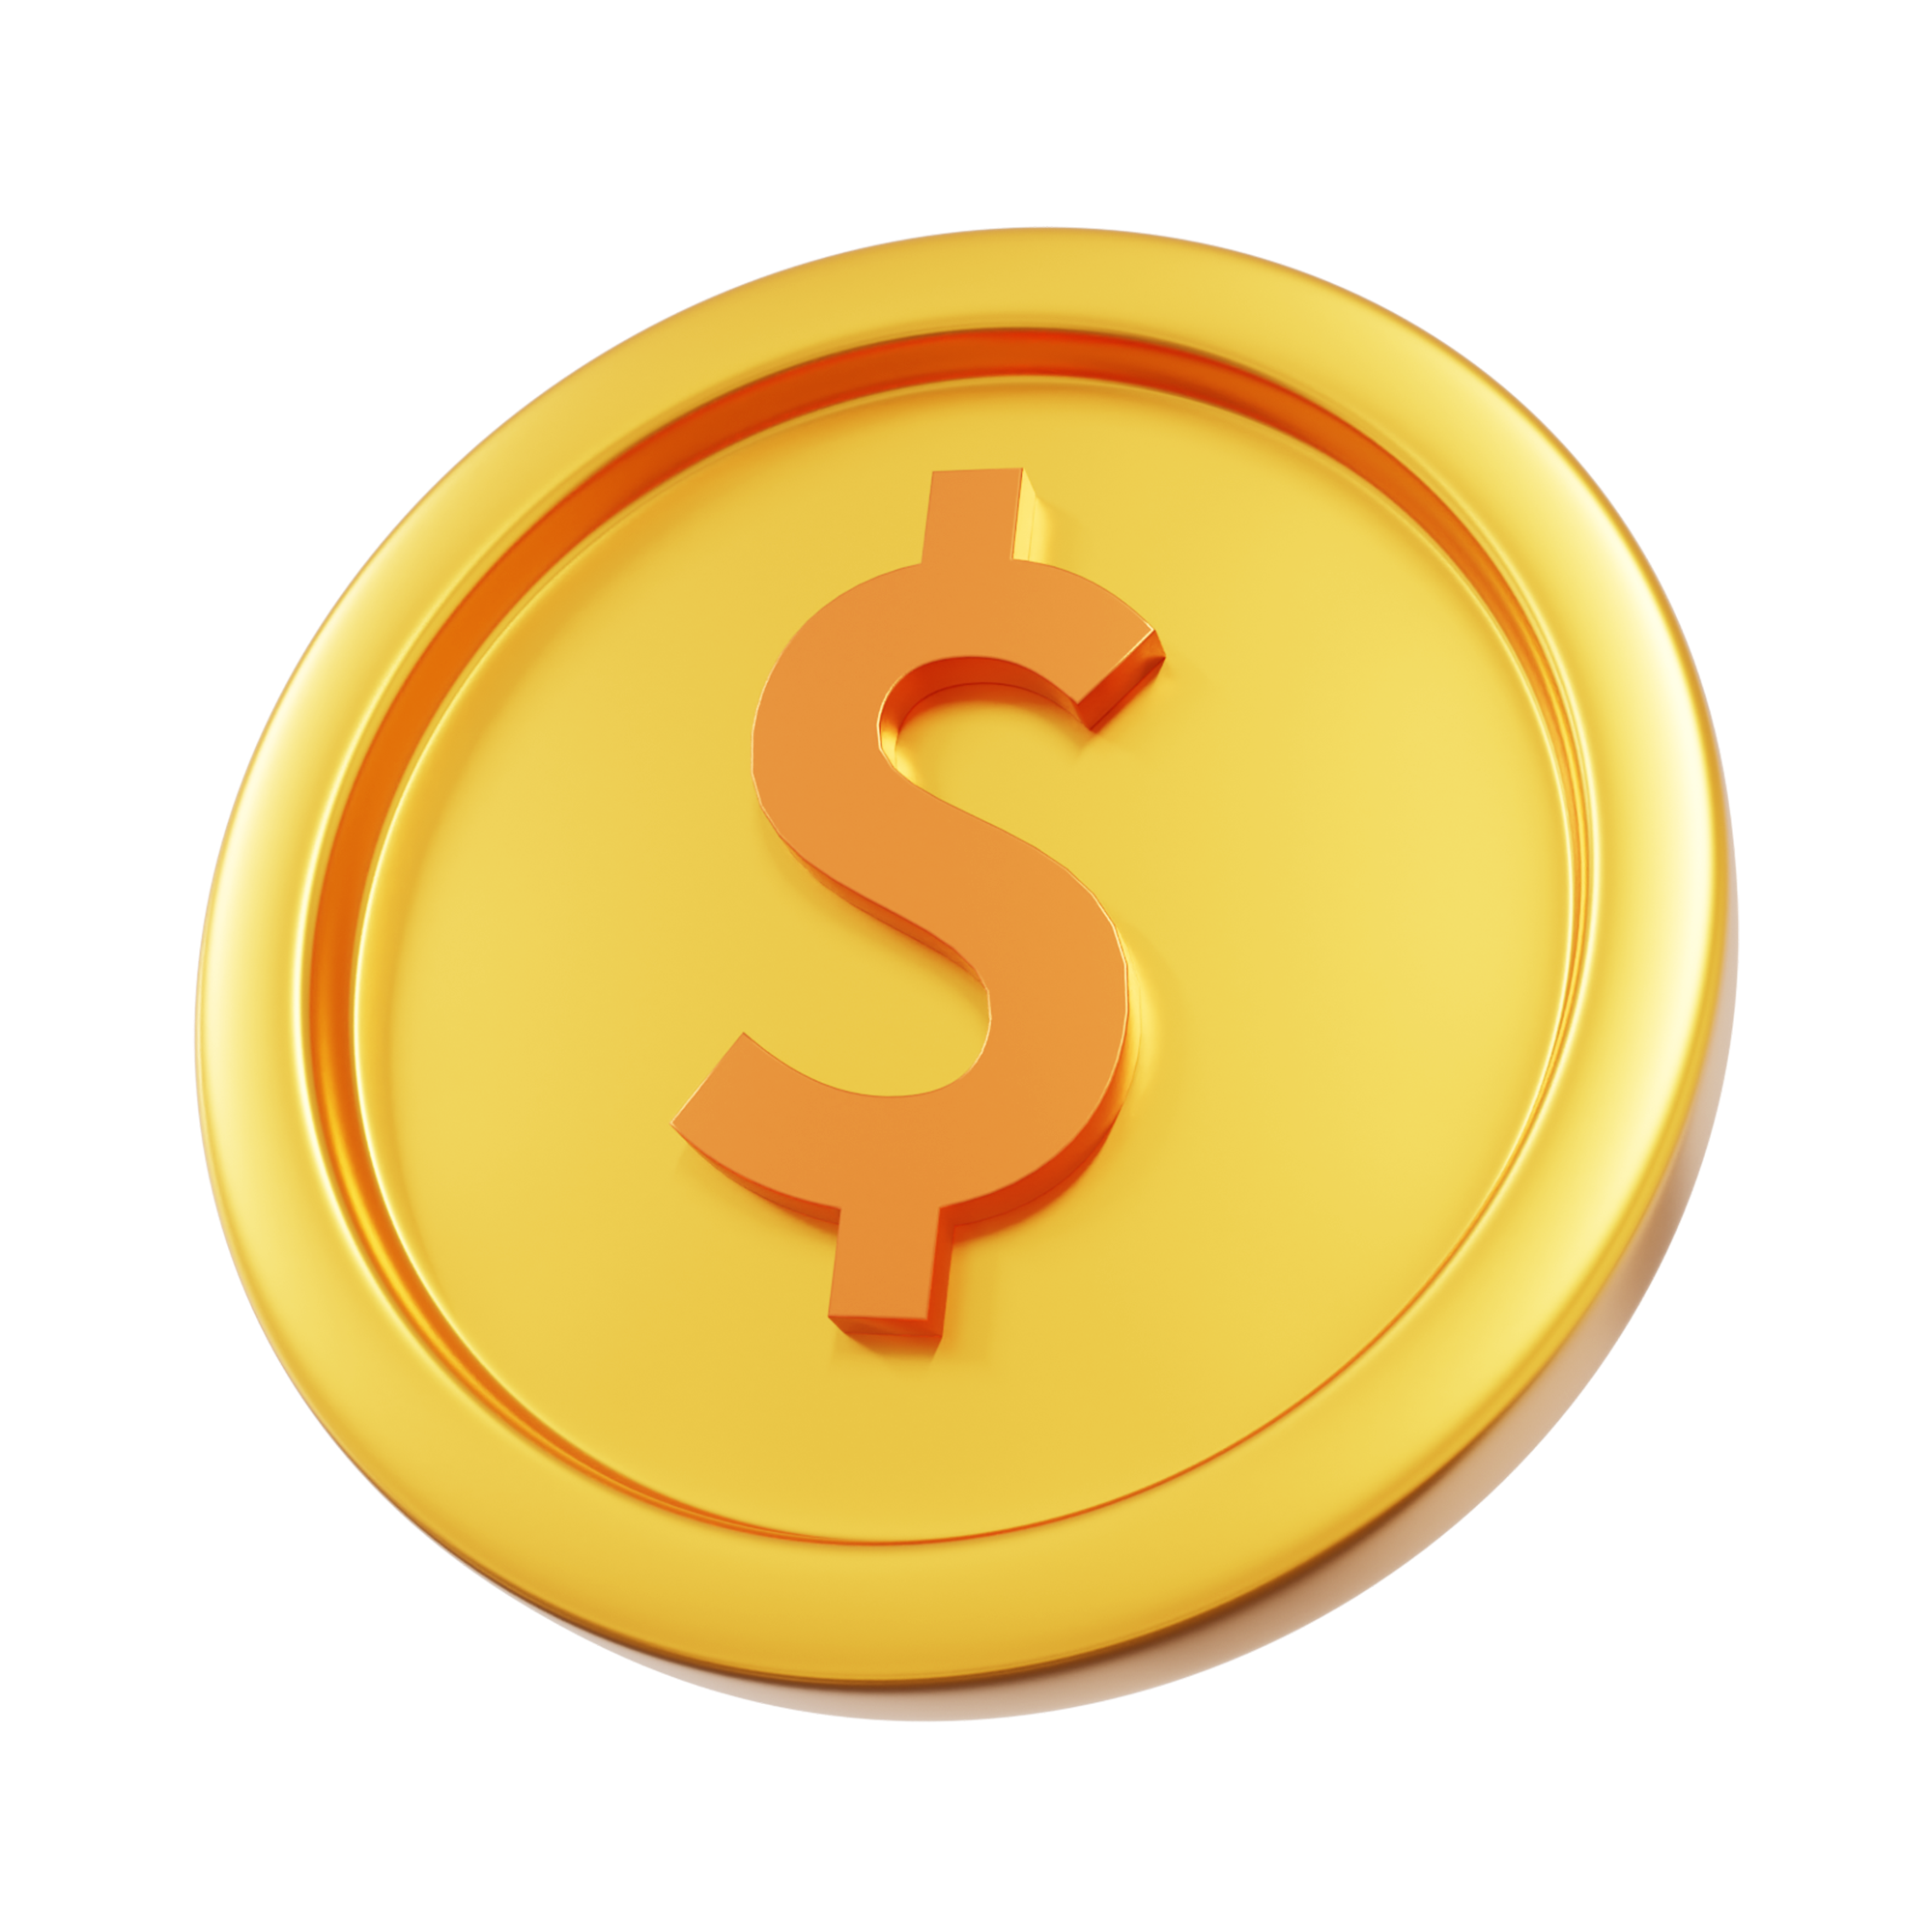 | ≥10 ¥CNY | 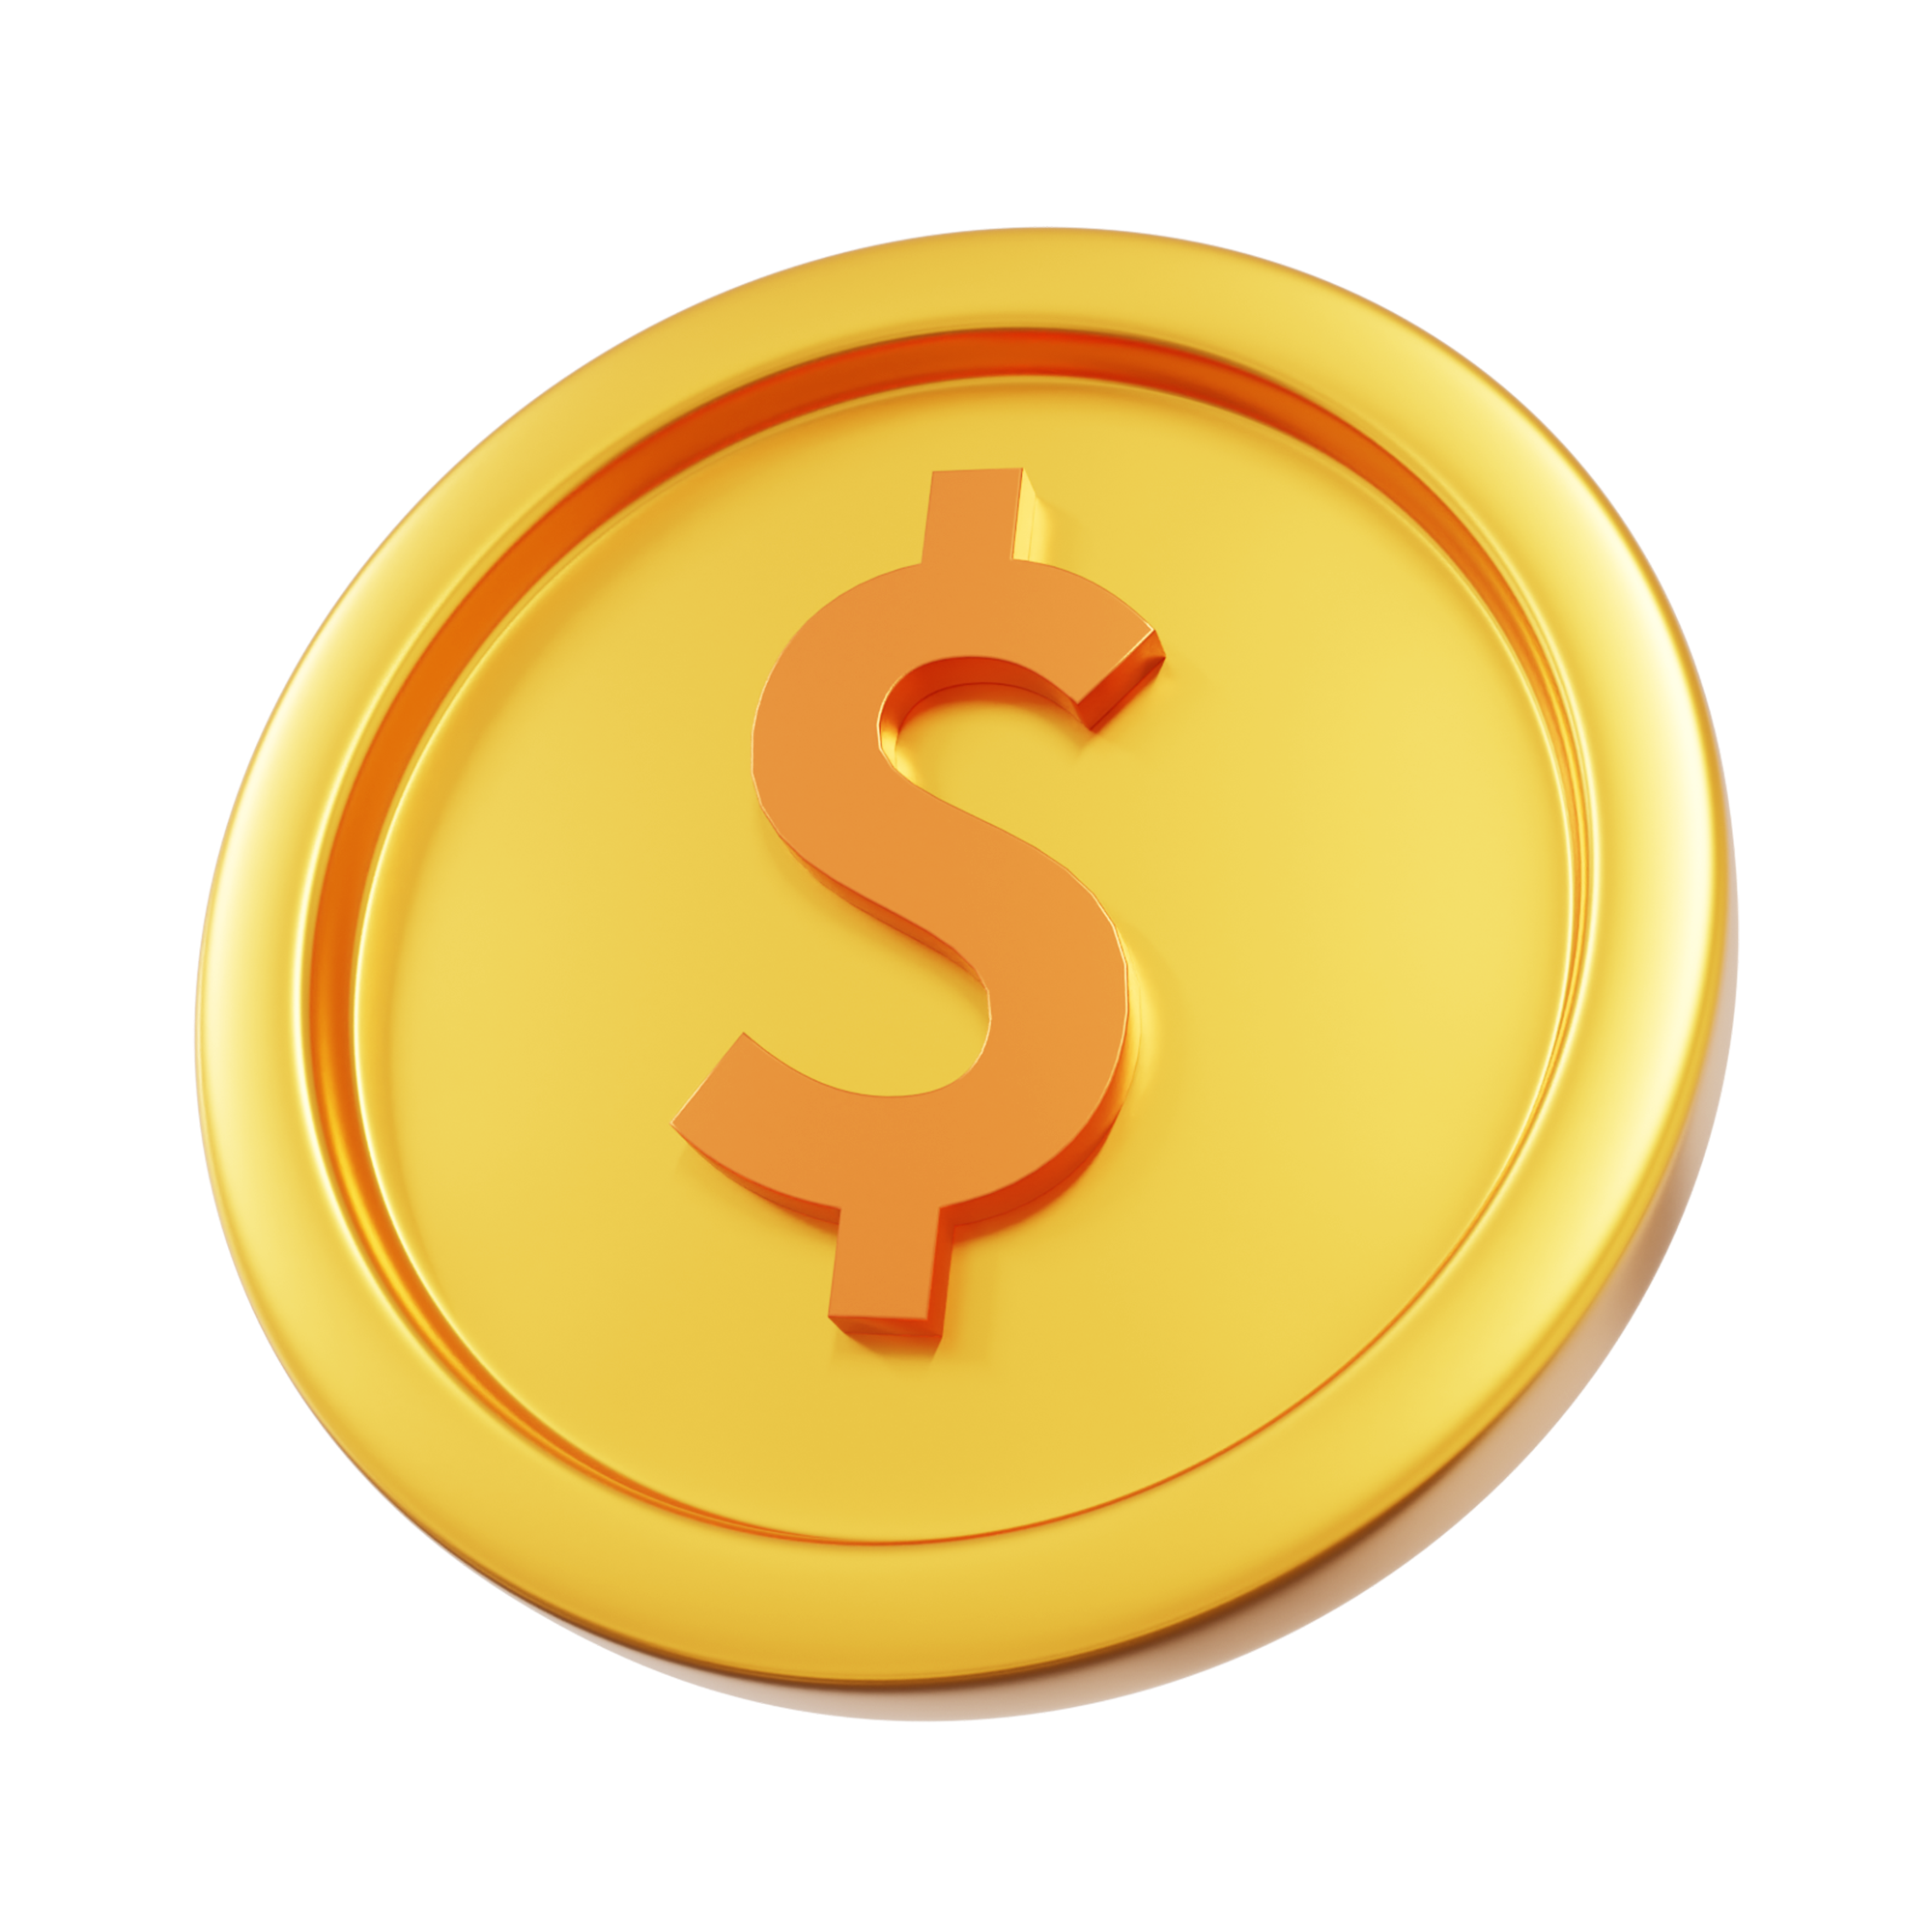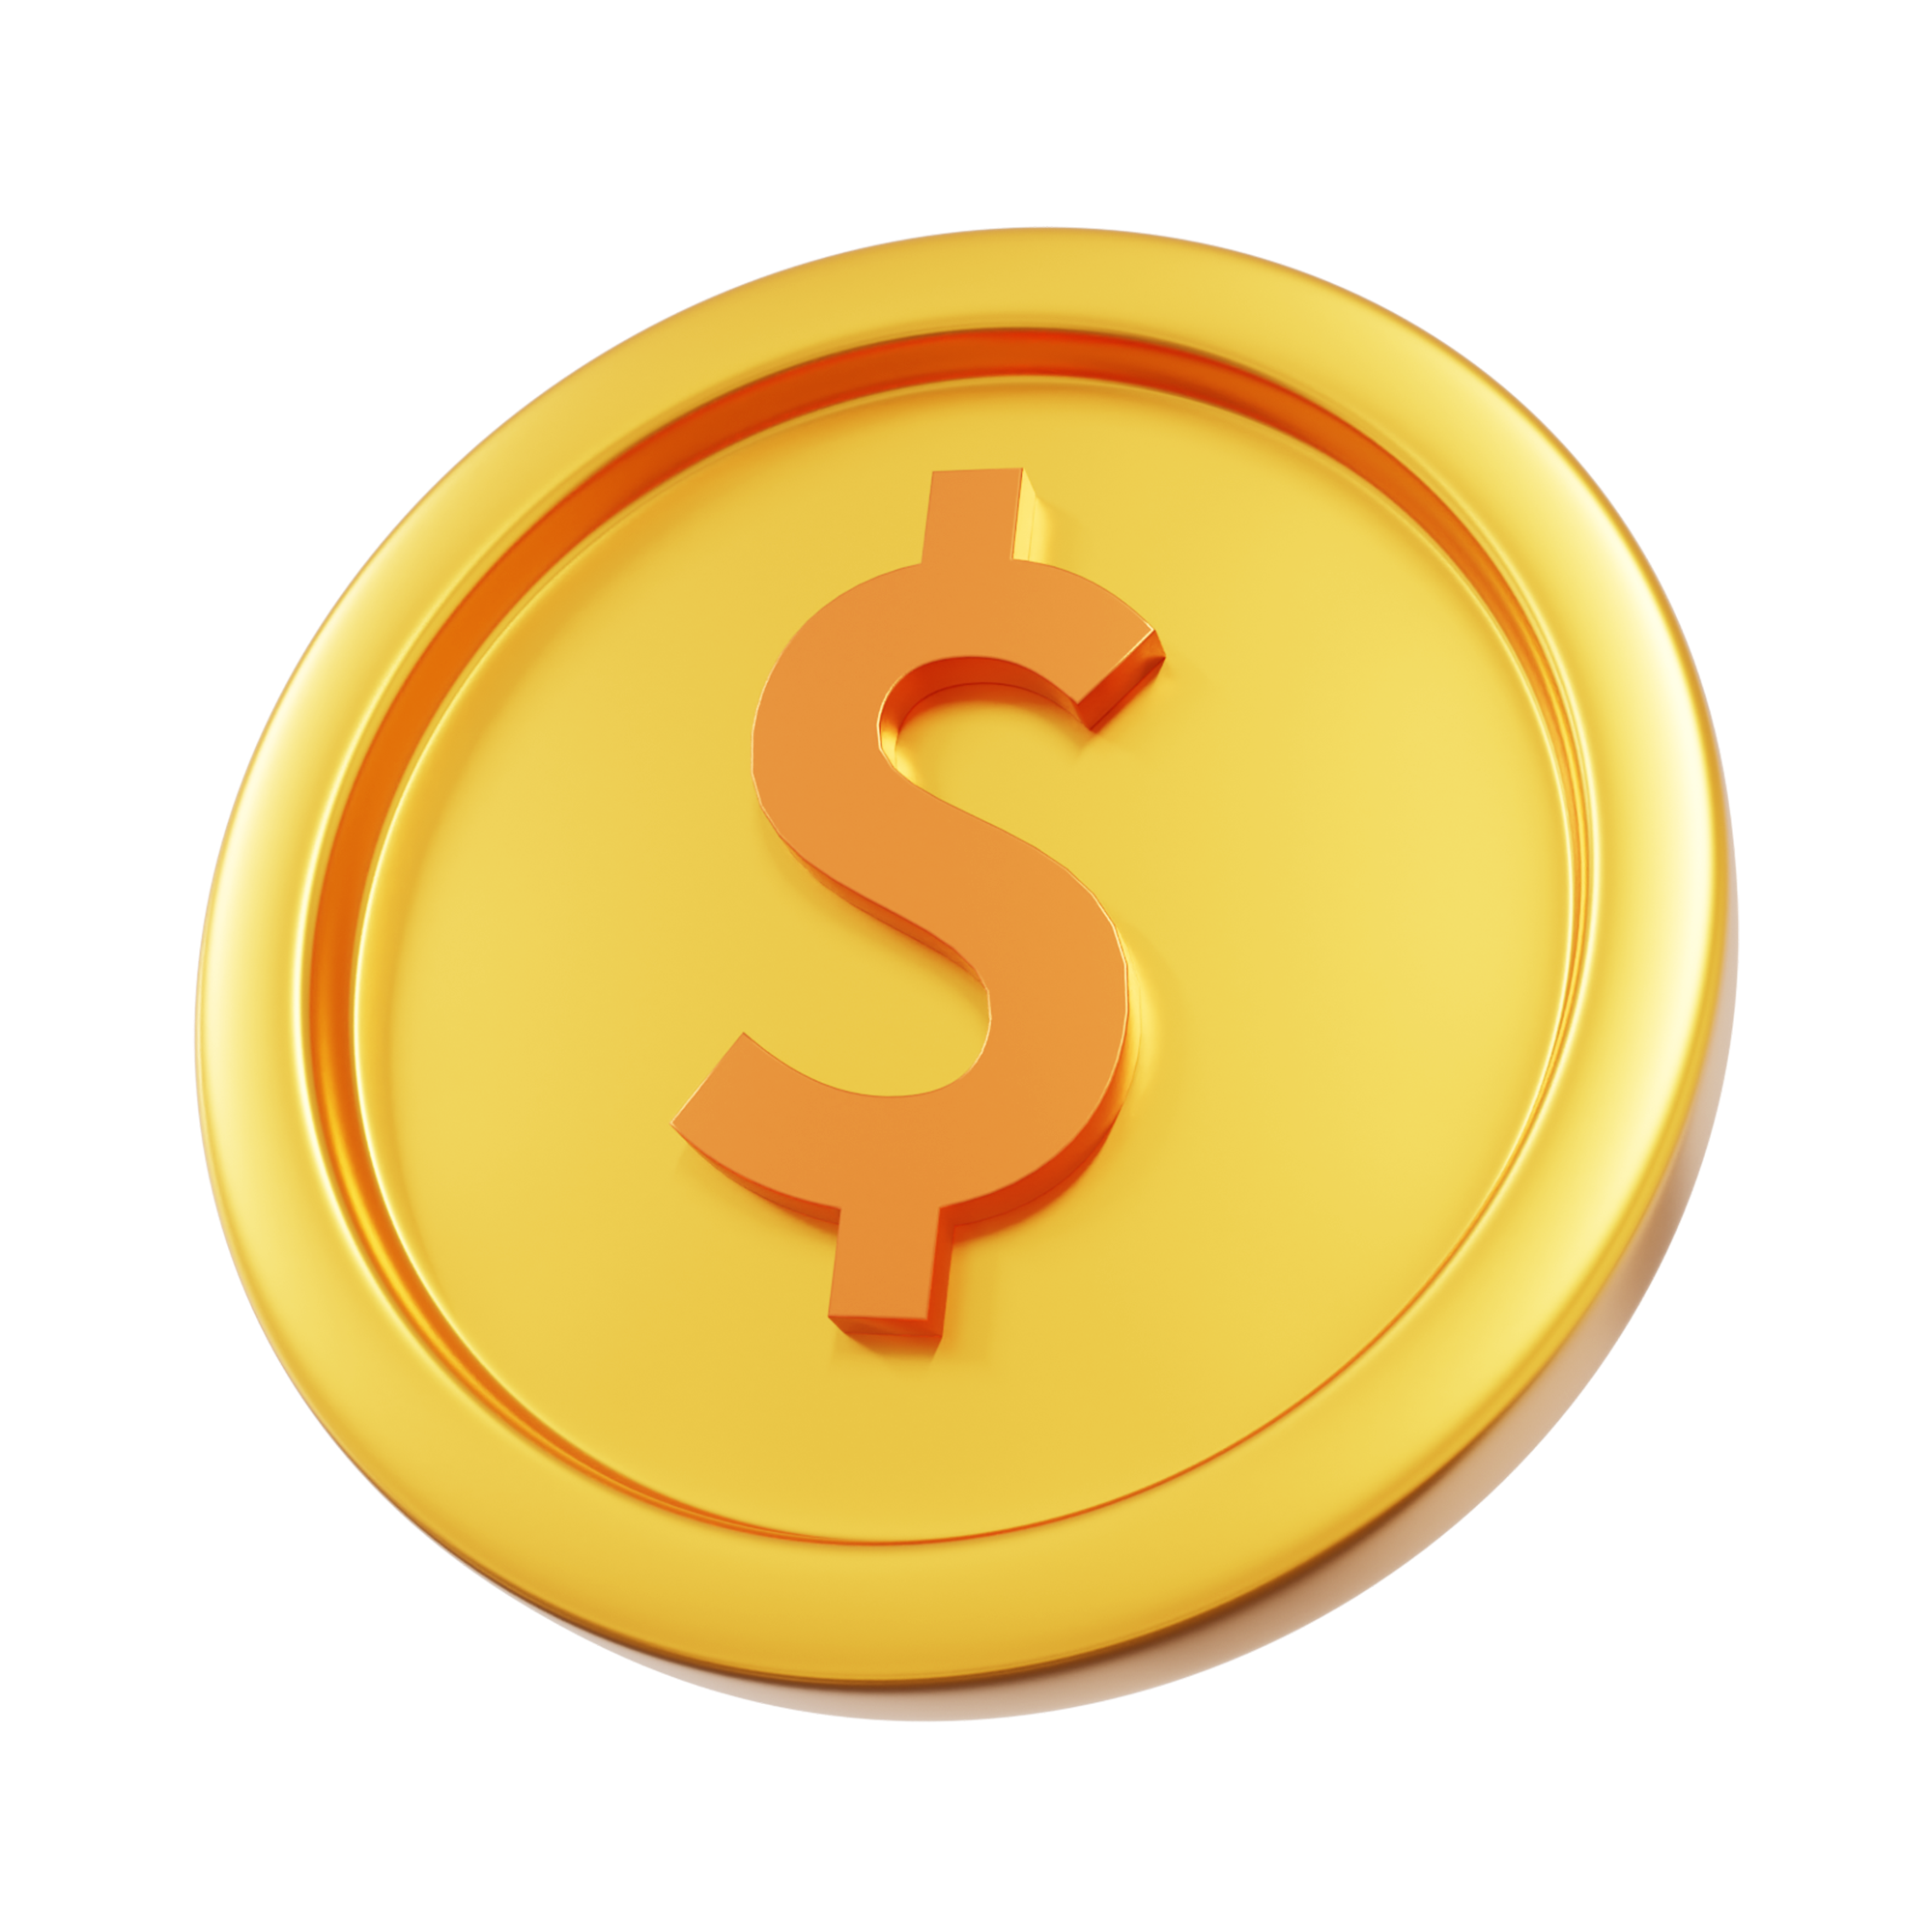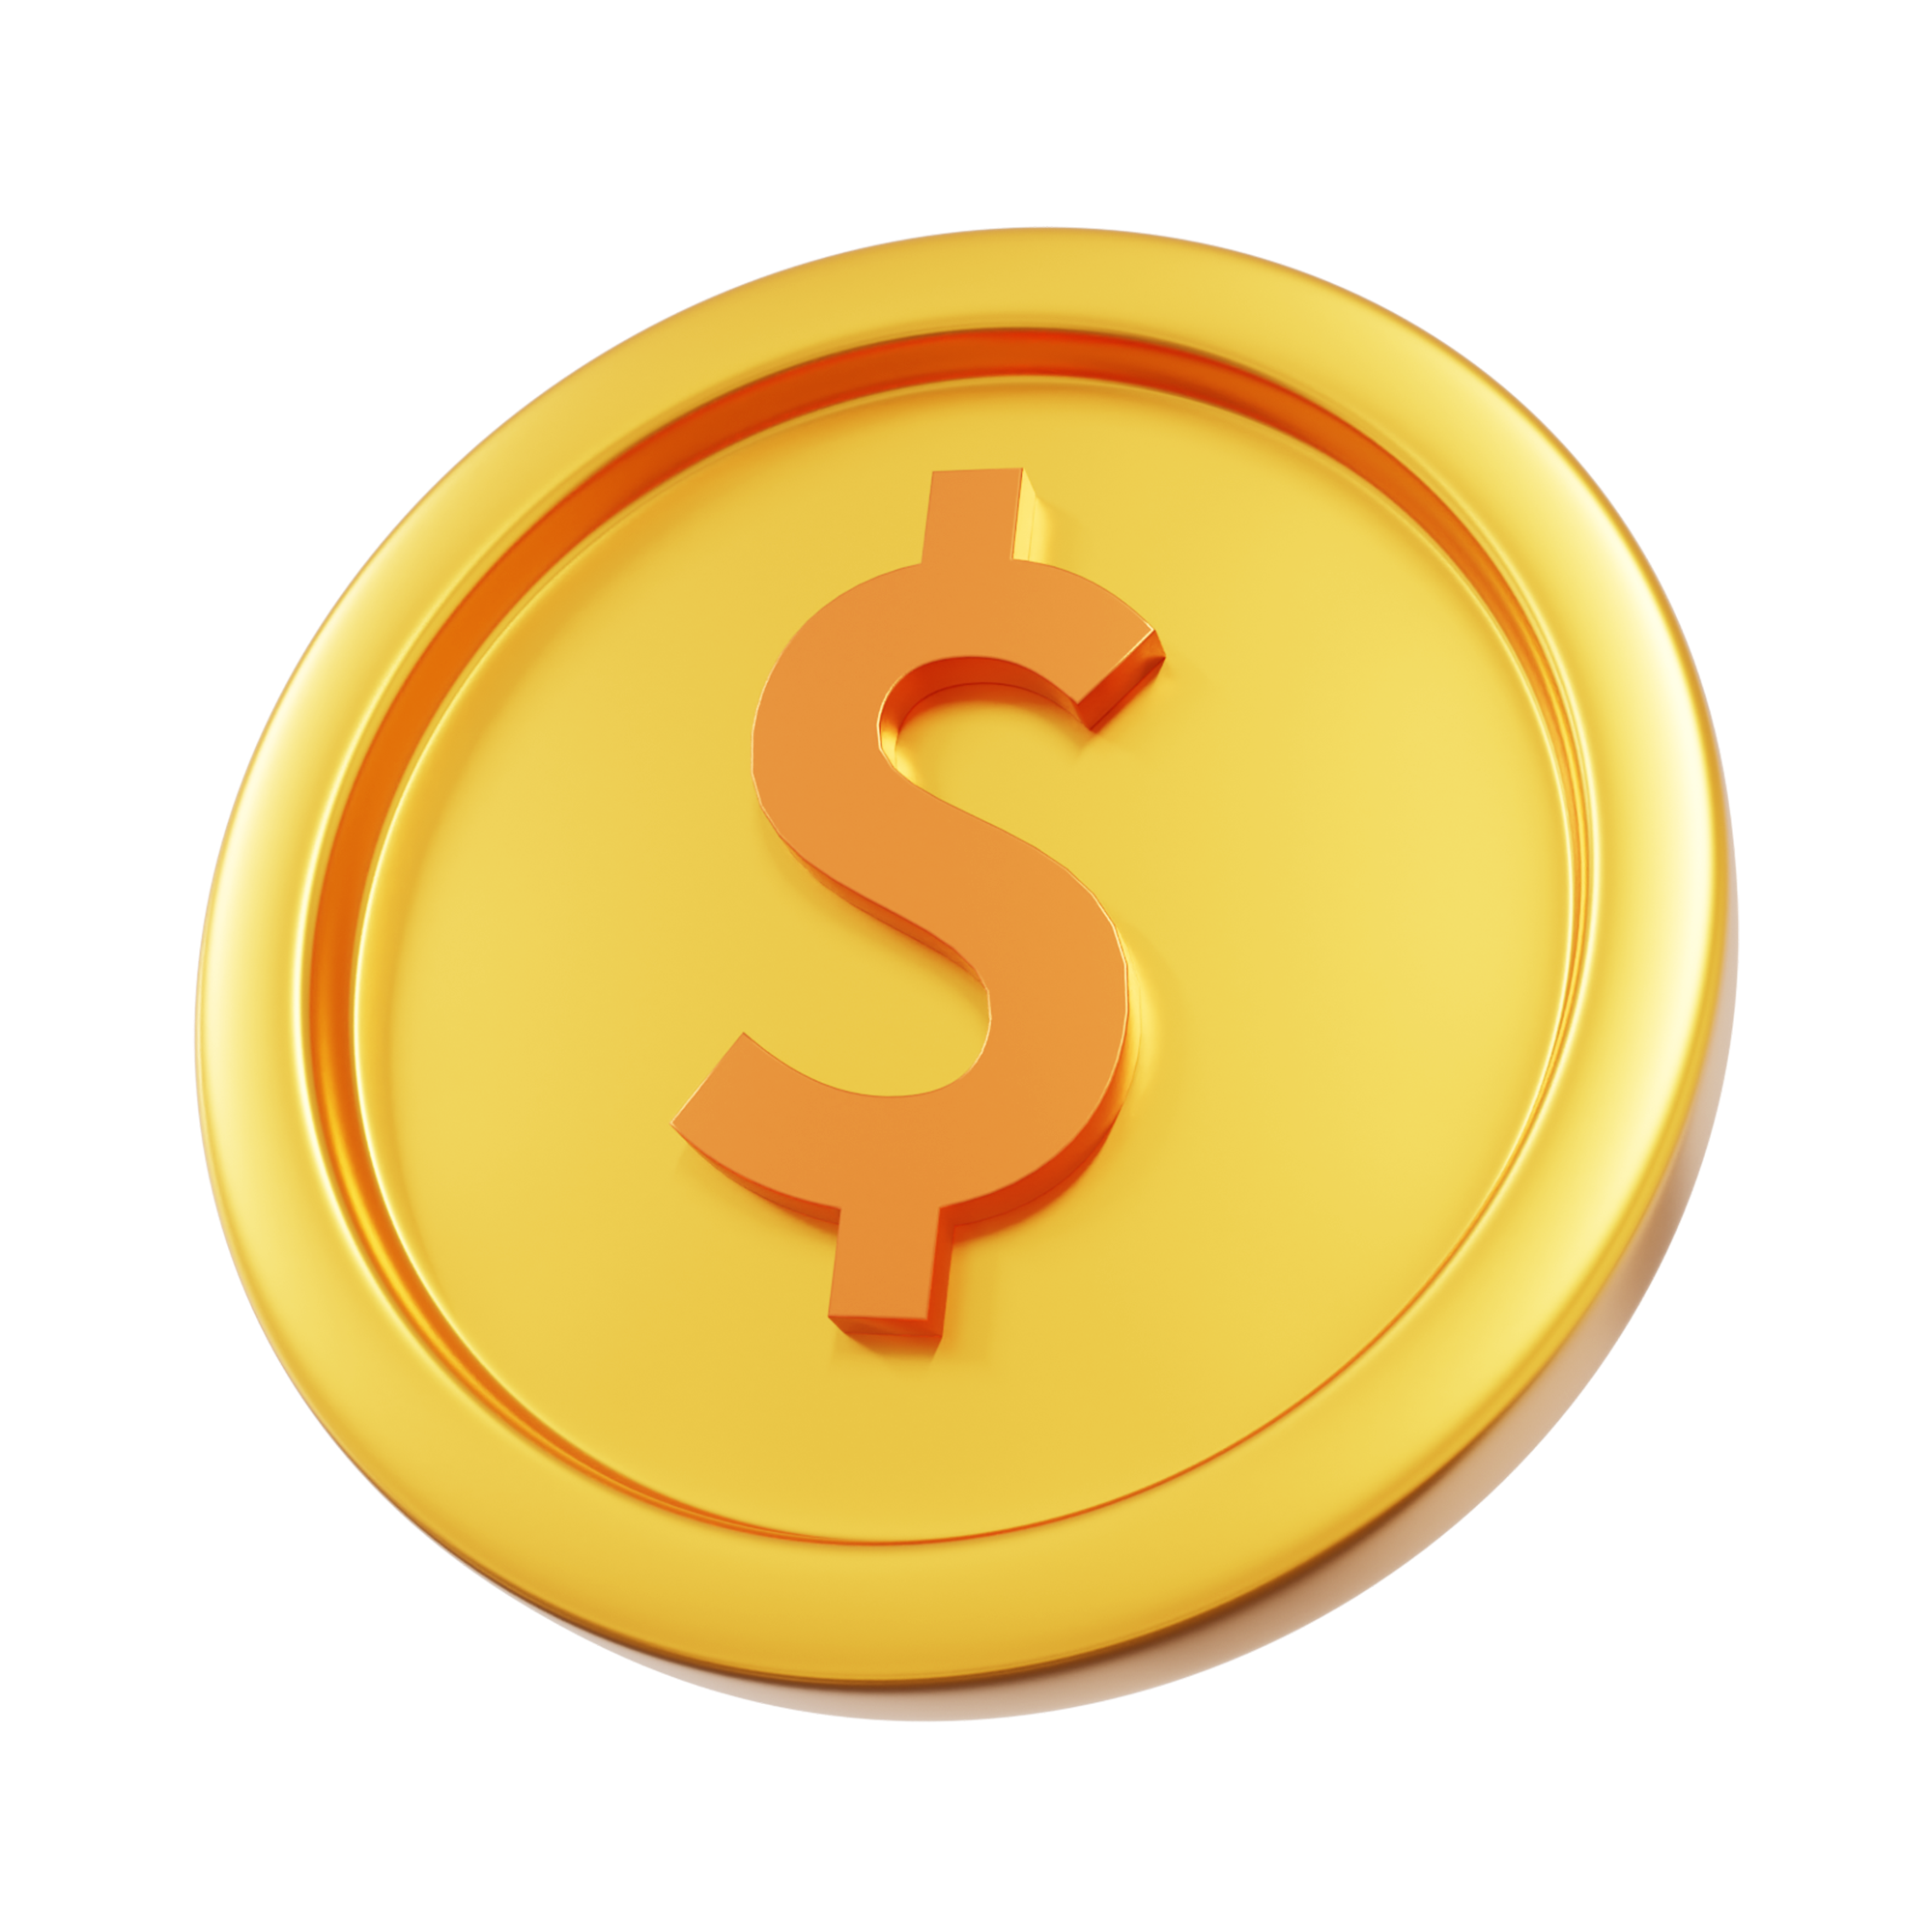 |
| Package Size | Large | 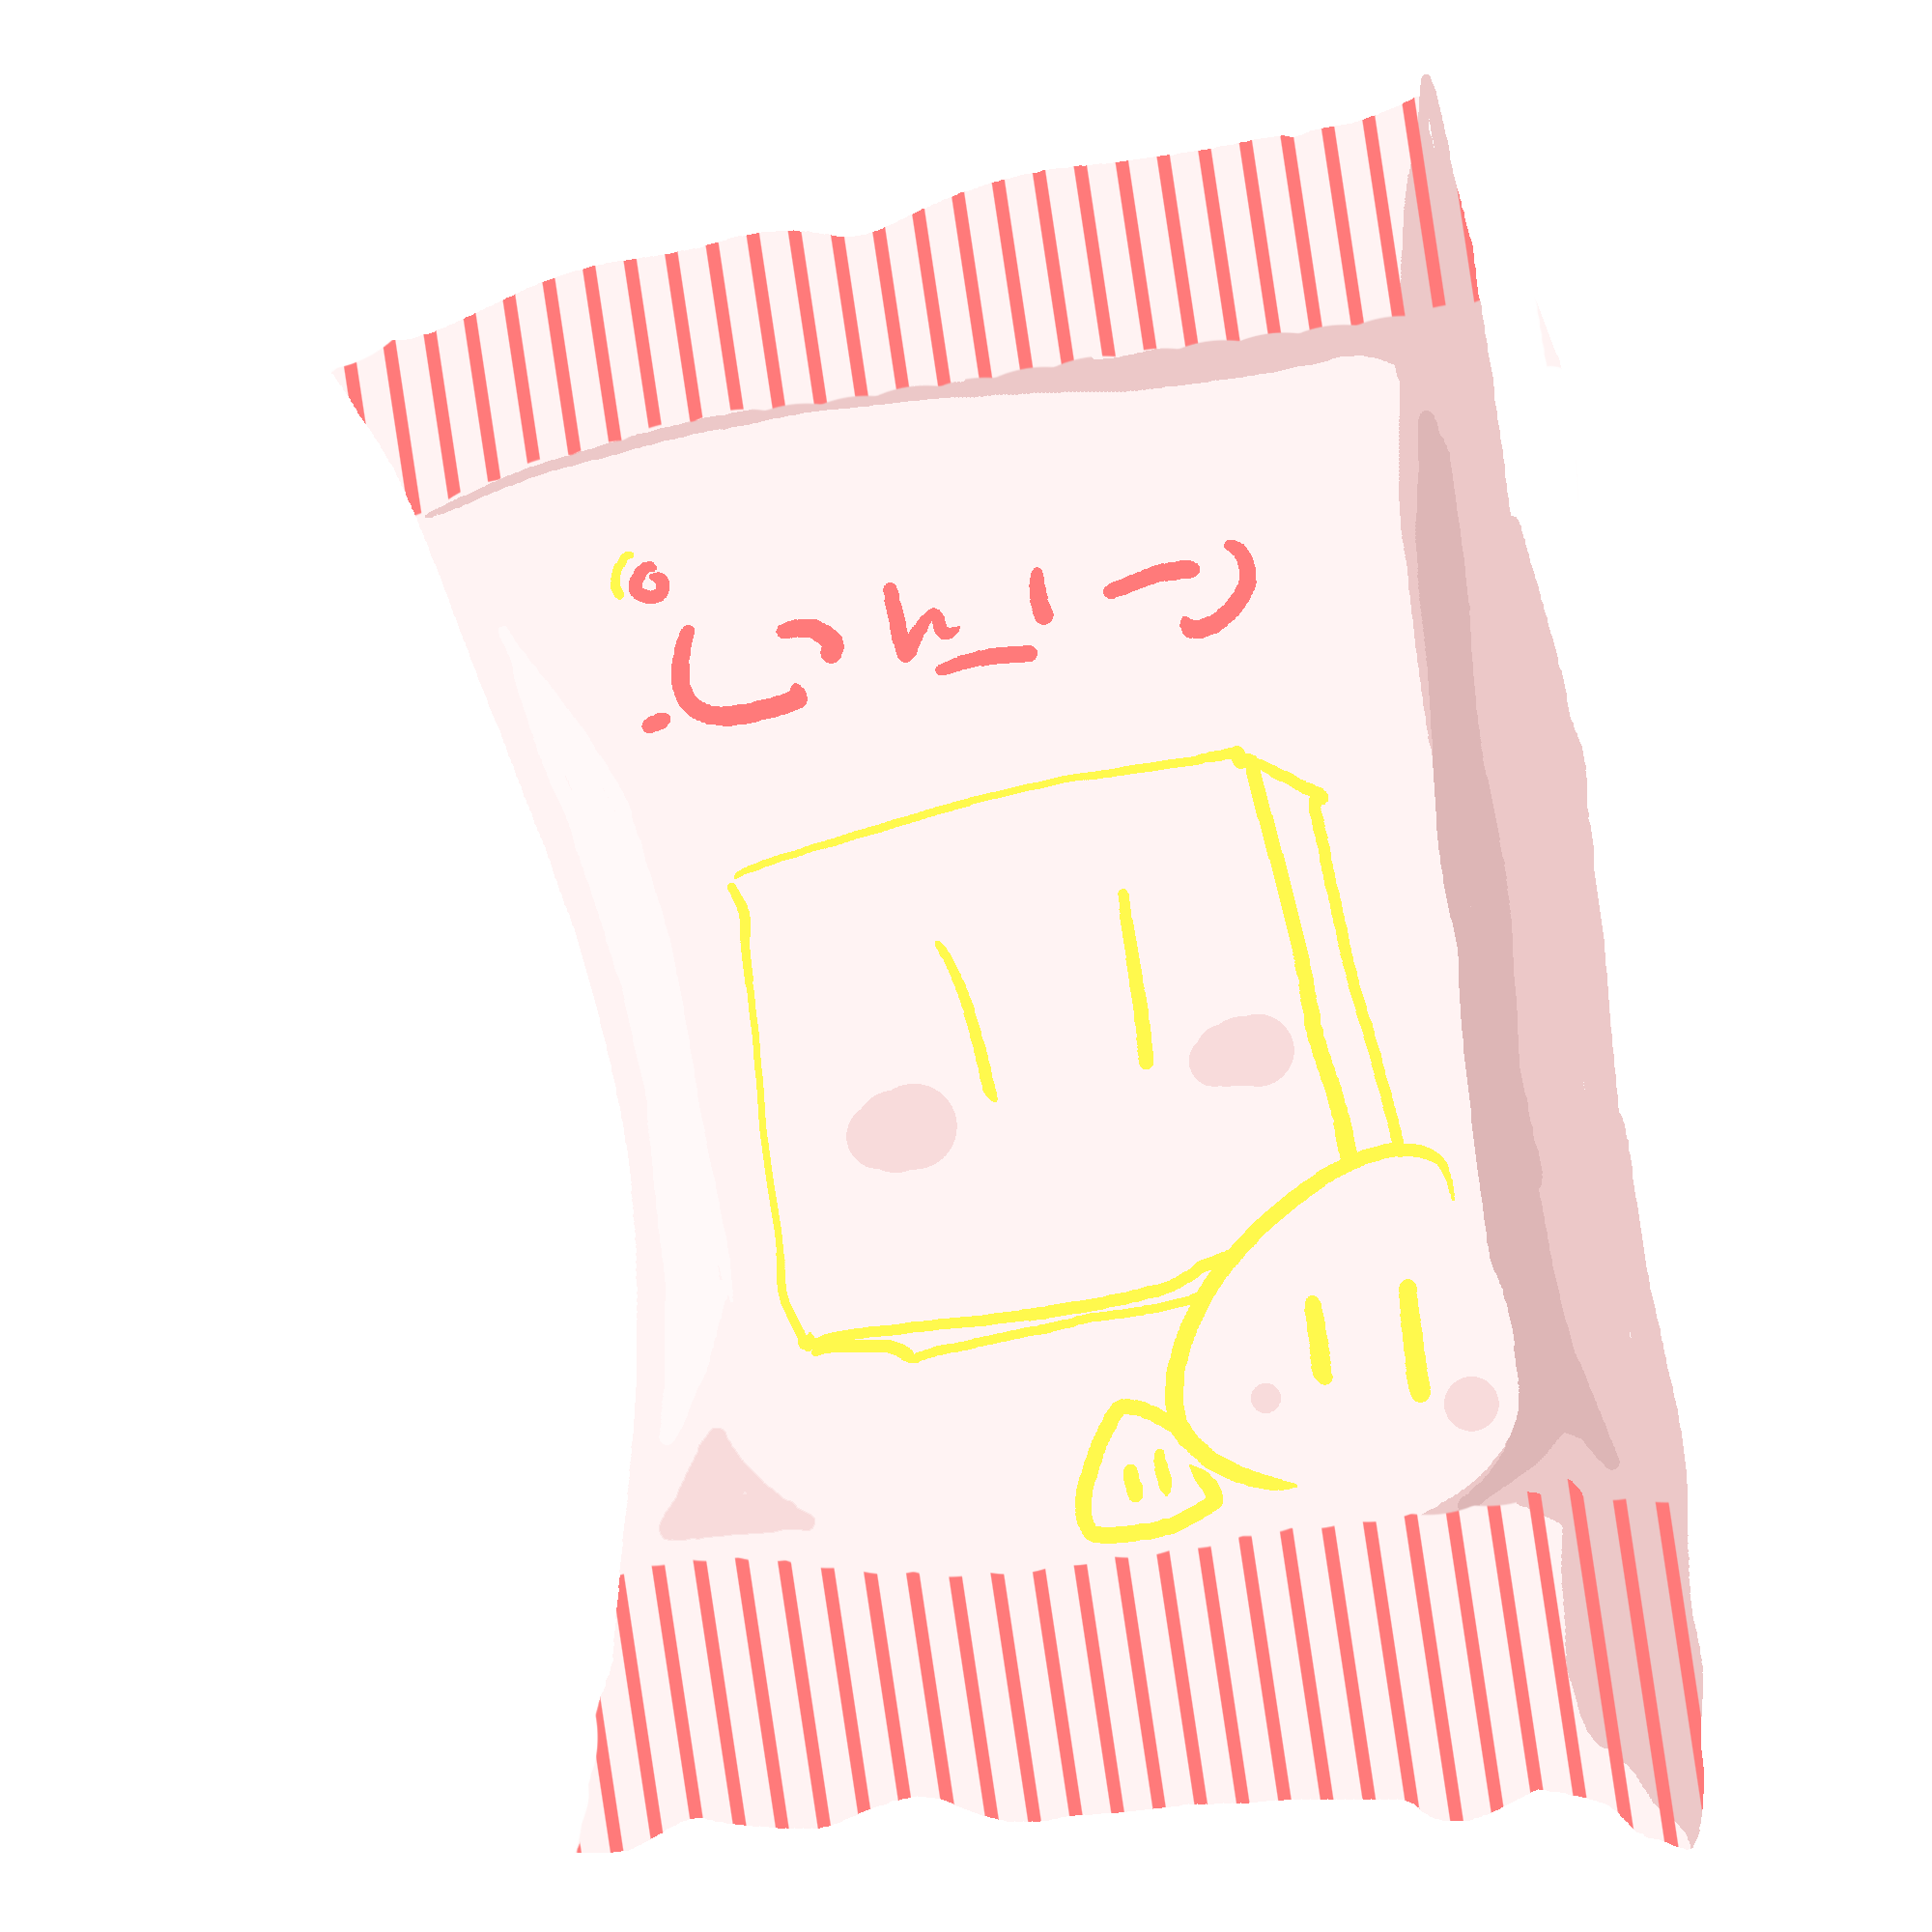 | Medium | 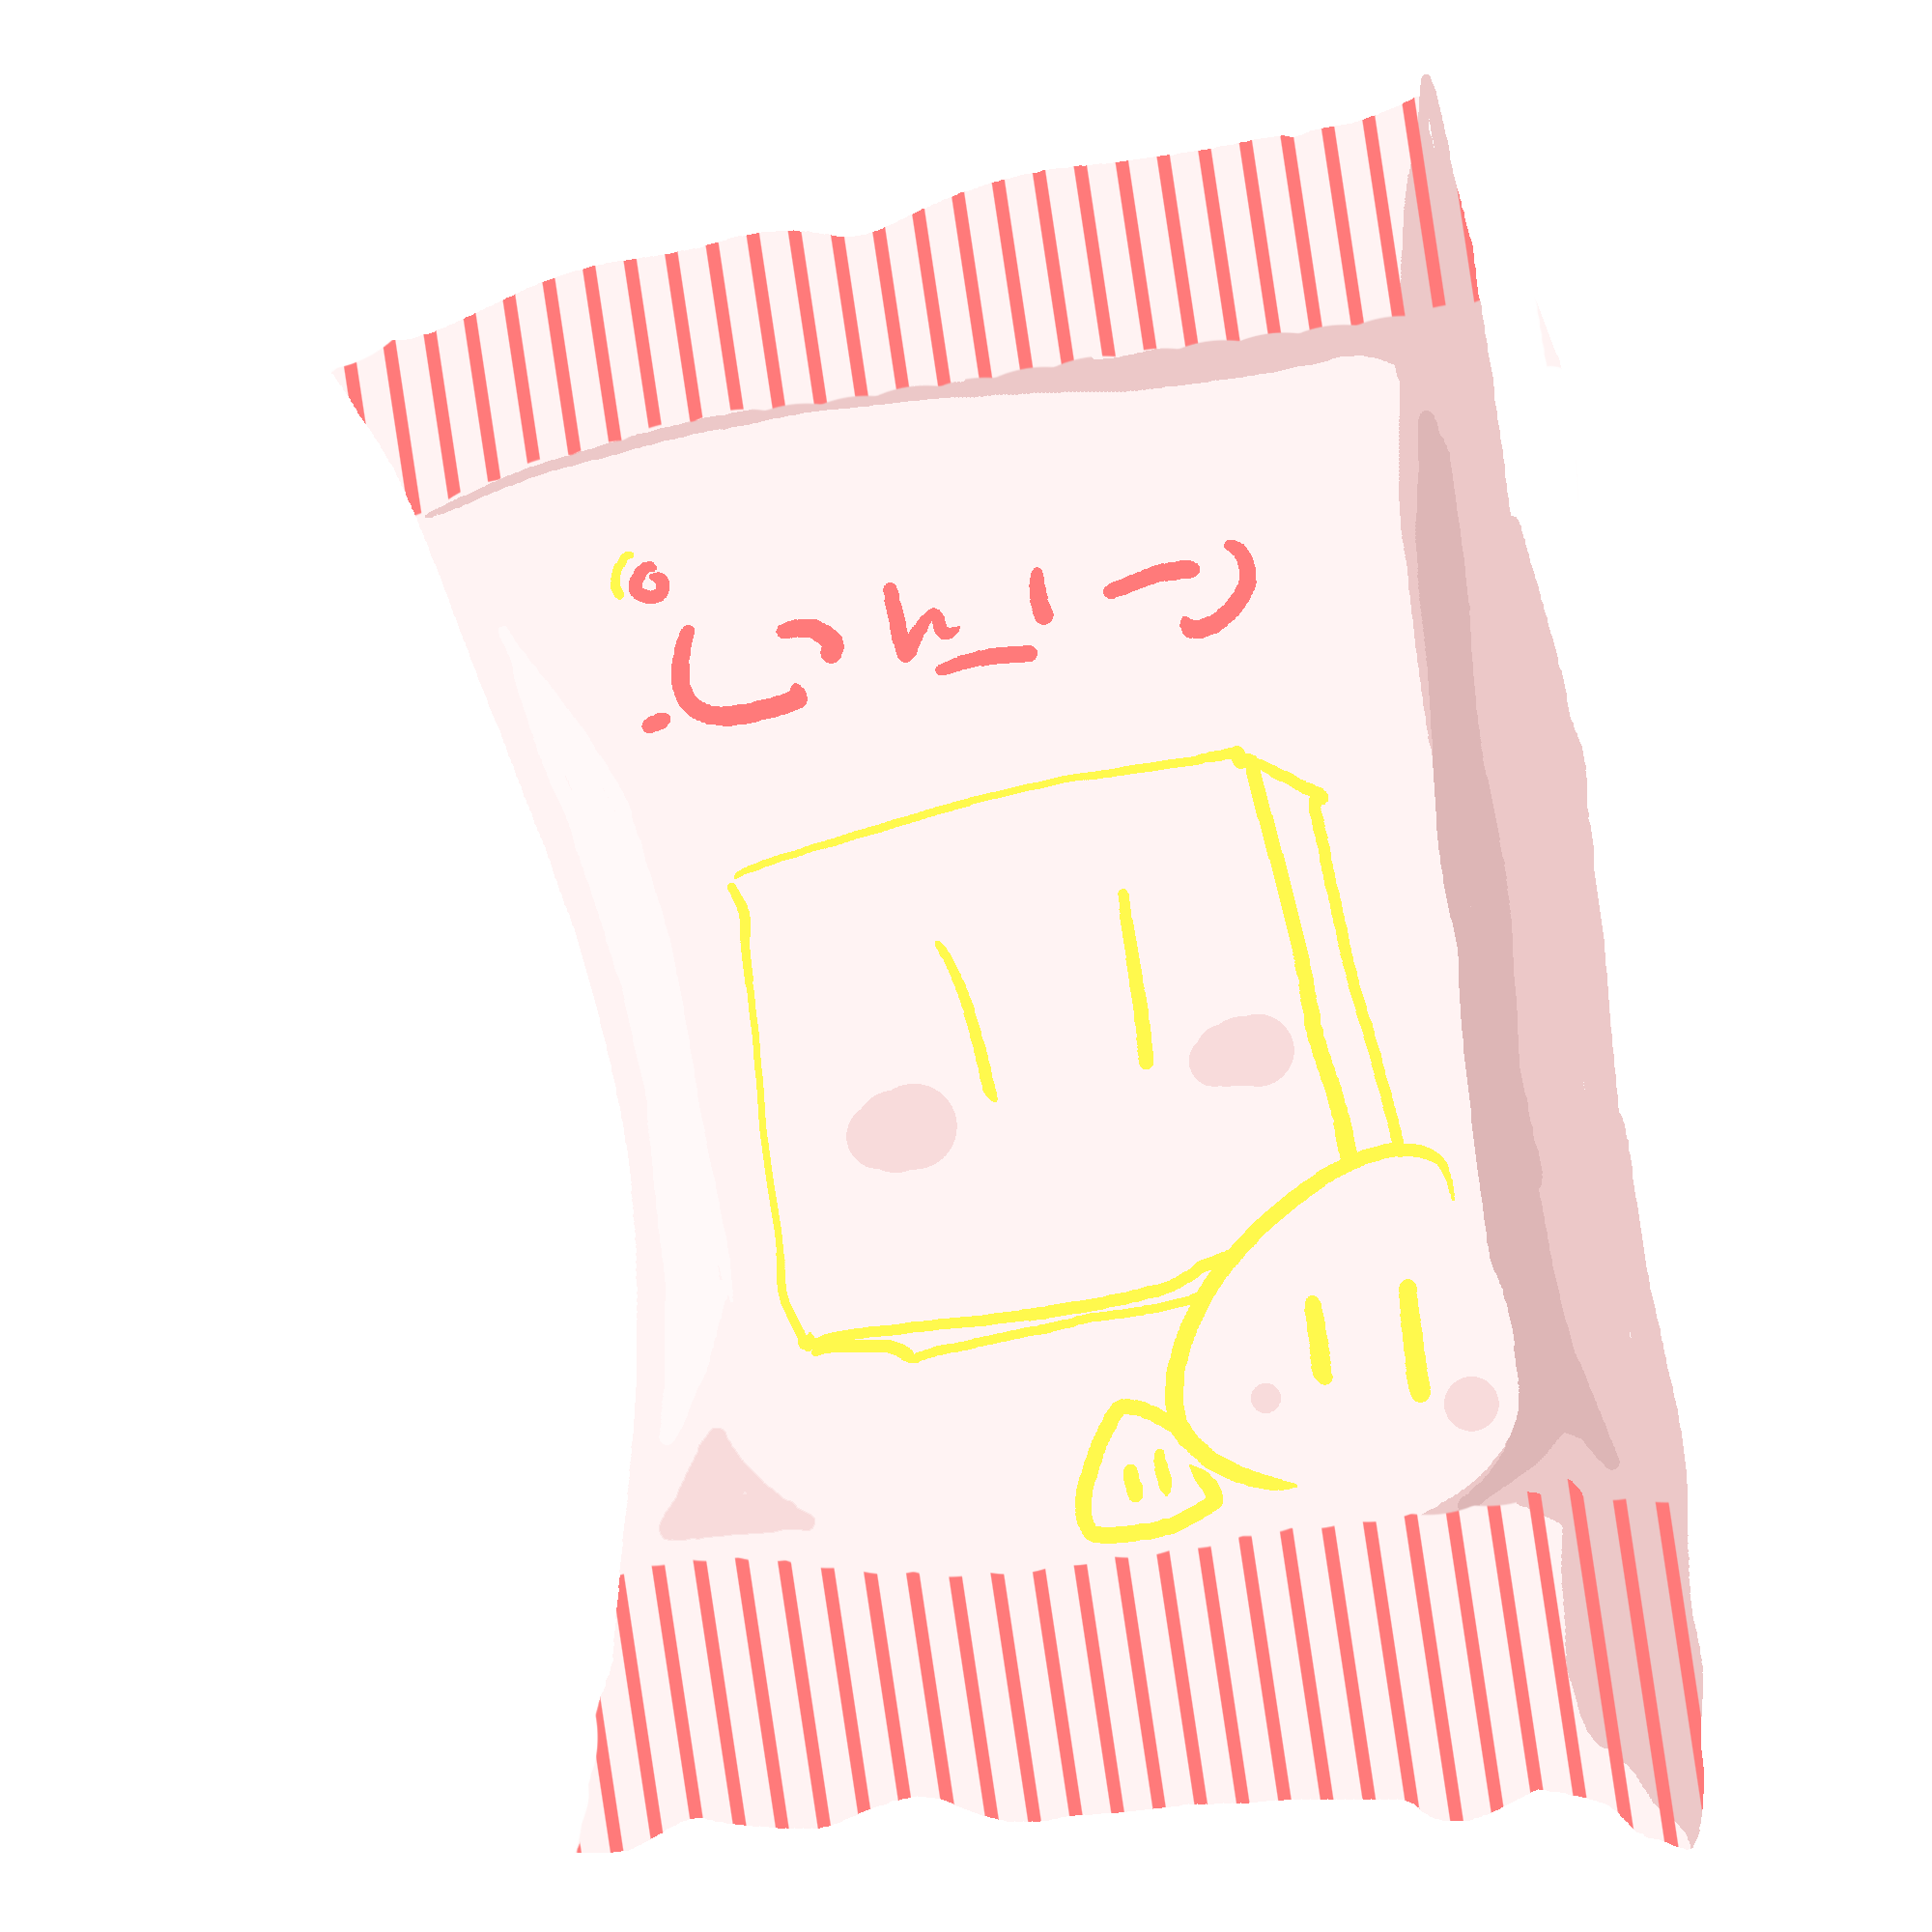 |
| Social Influence | Advertising/  Influencer Recommendations | 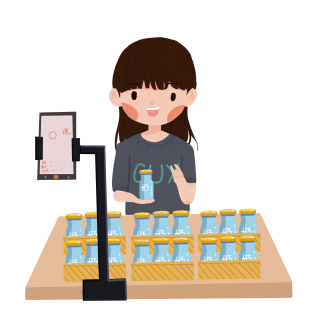 | Peer Recommendations | 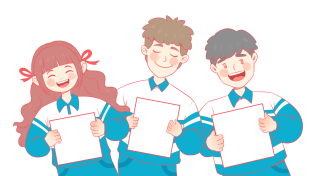 |
| Which option would you be more willing to choose | Snack A □ | | Snack B □ | |
| Considering your daily diet, would you consume this snack in real life?  Yes□ No□ | | | | |

Choice Set 2/8

| Snack Attributes | Snack A | | Snack B | |
| --- | --- | --- | --- | --- |
| Taste | Sweet Flavor | 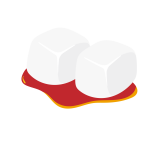 | Original Flavor | 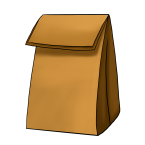 |
| Nutrient Claims | None | 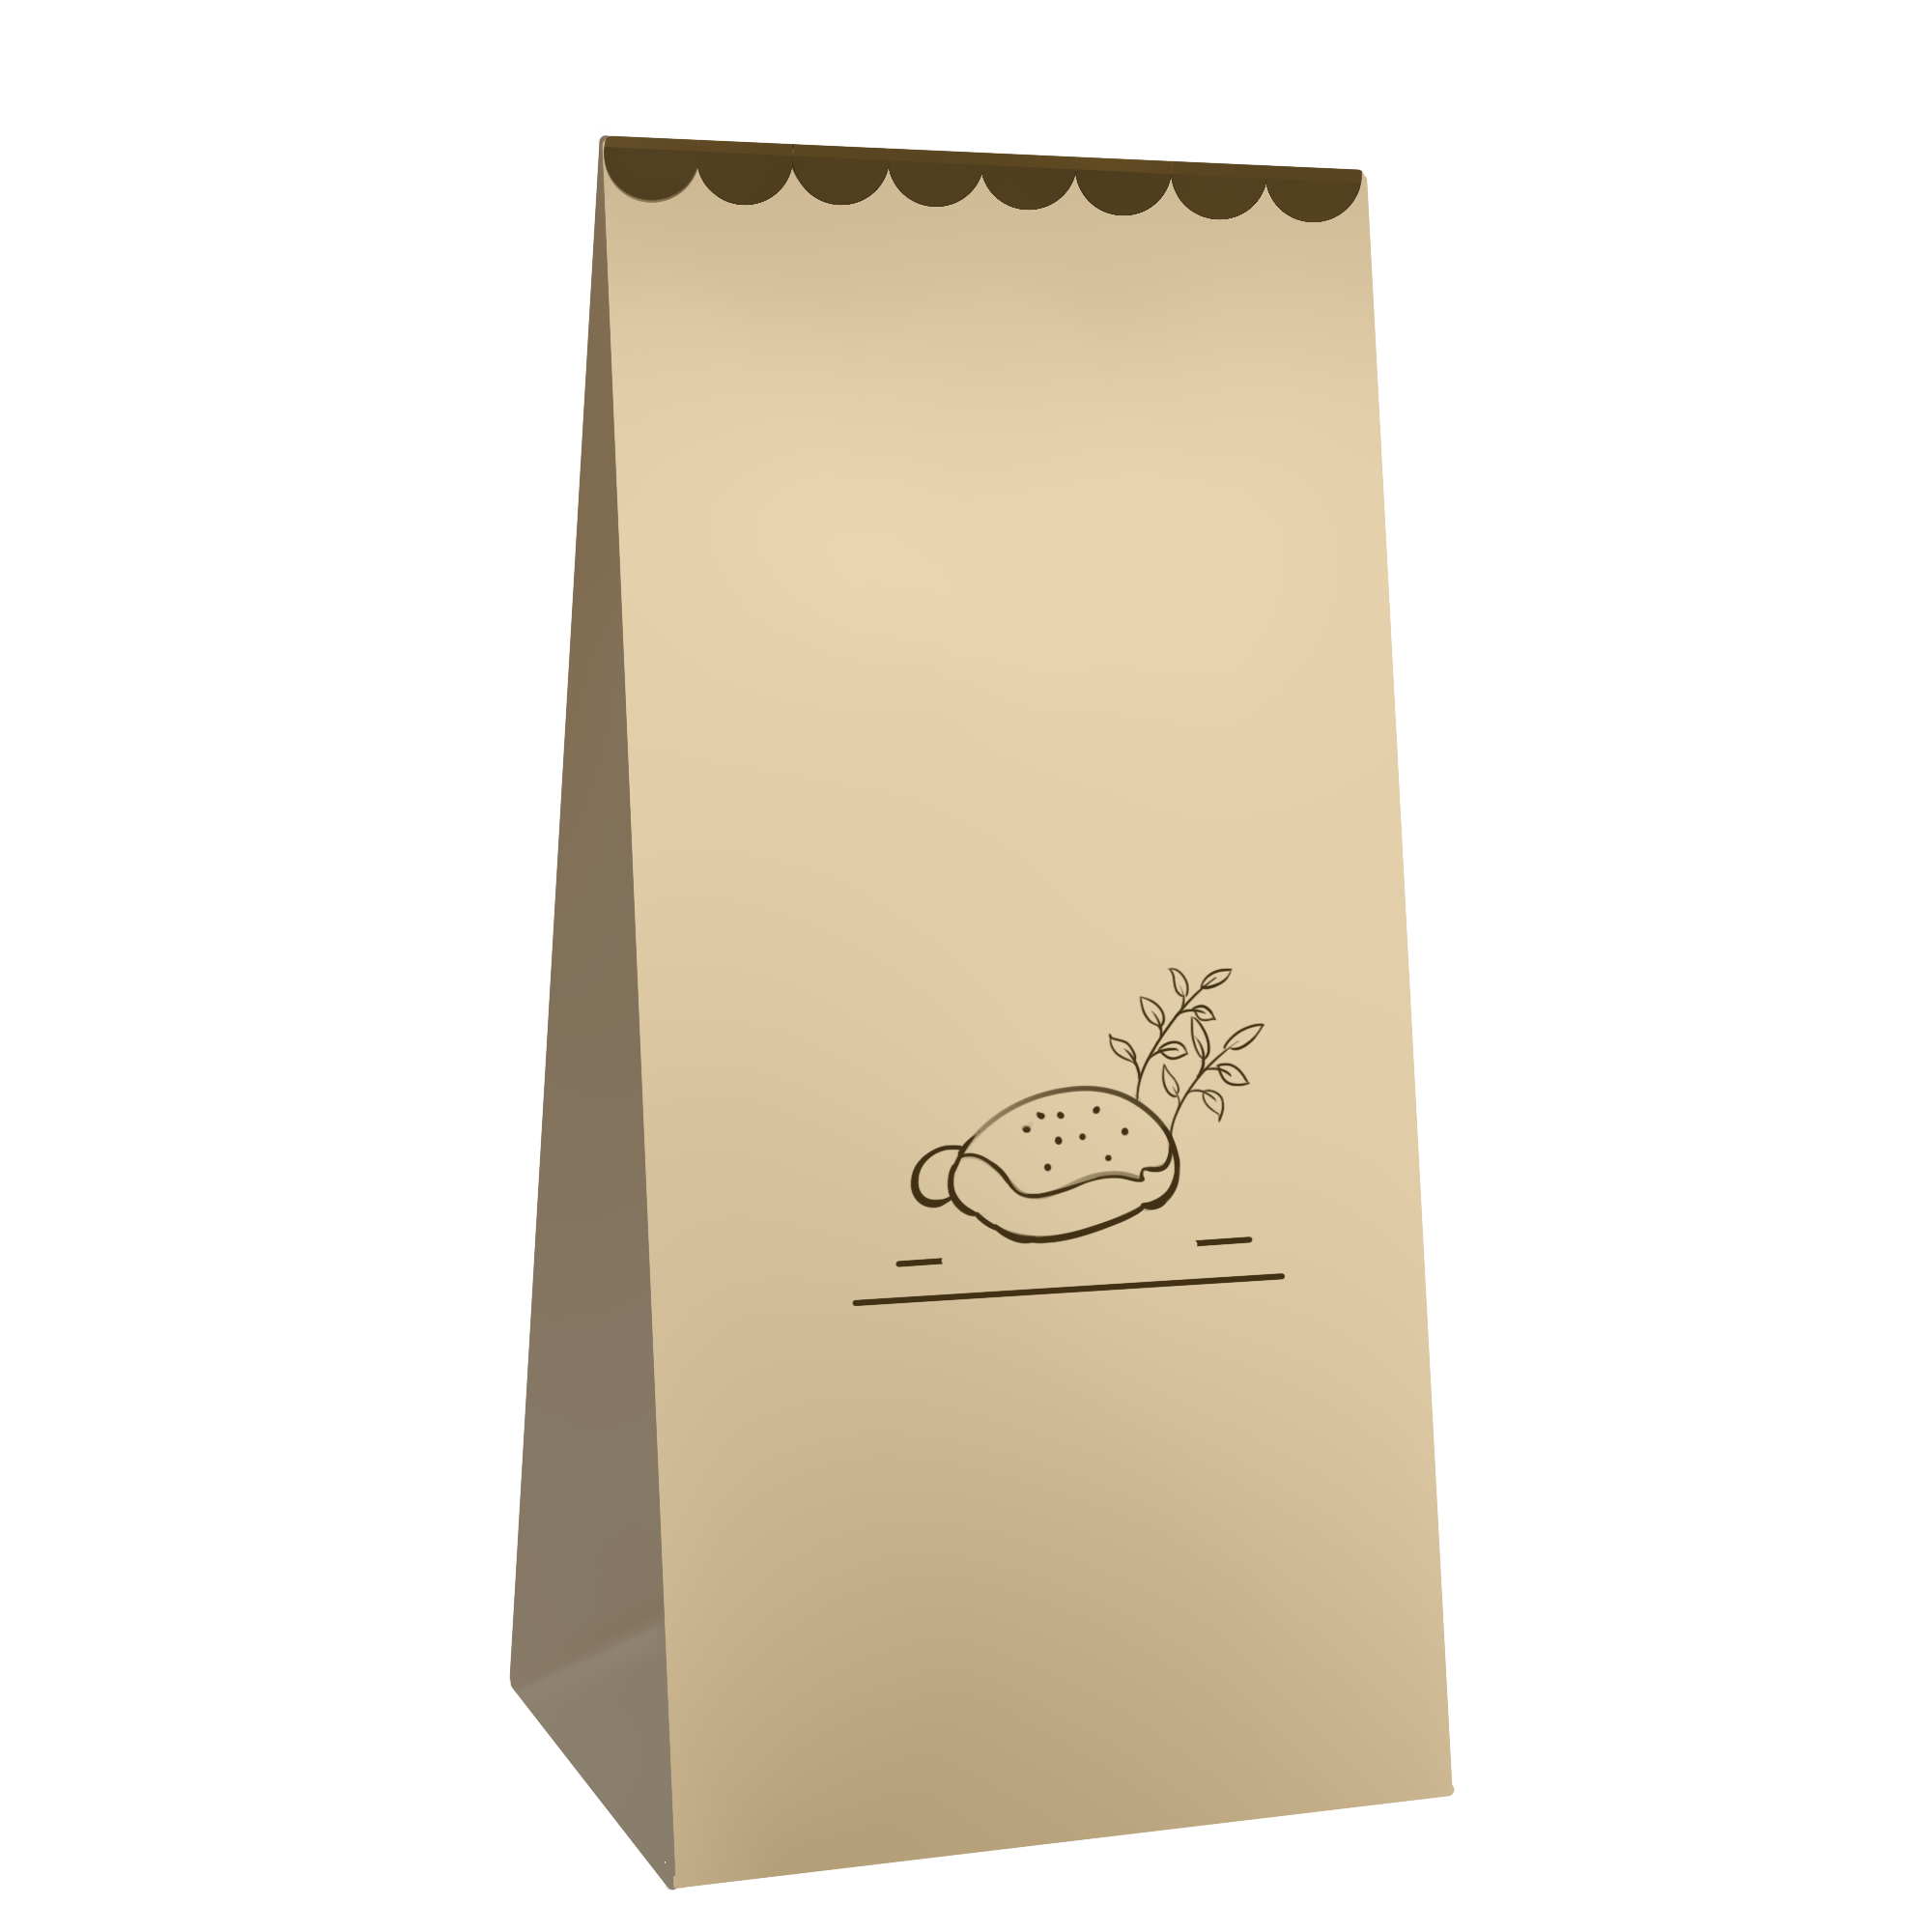 | Rich Minerals / Vitamins | 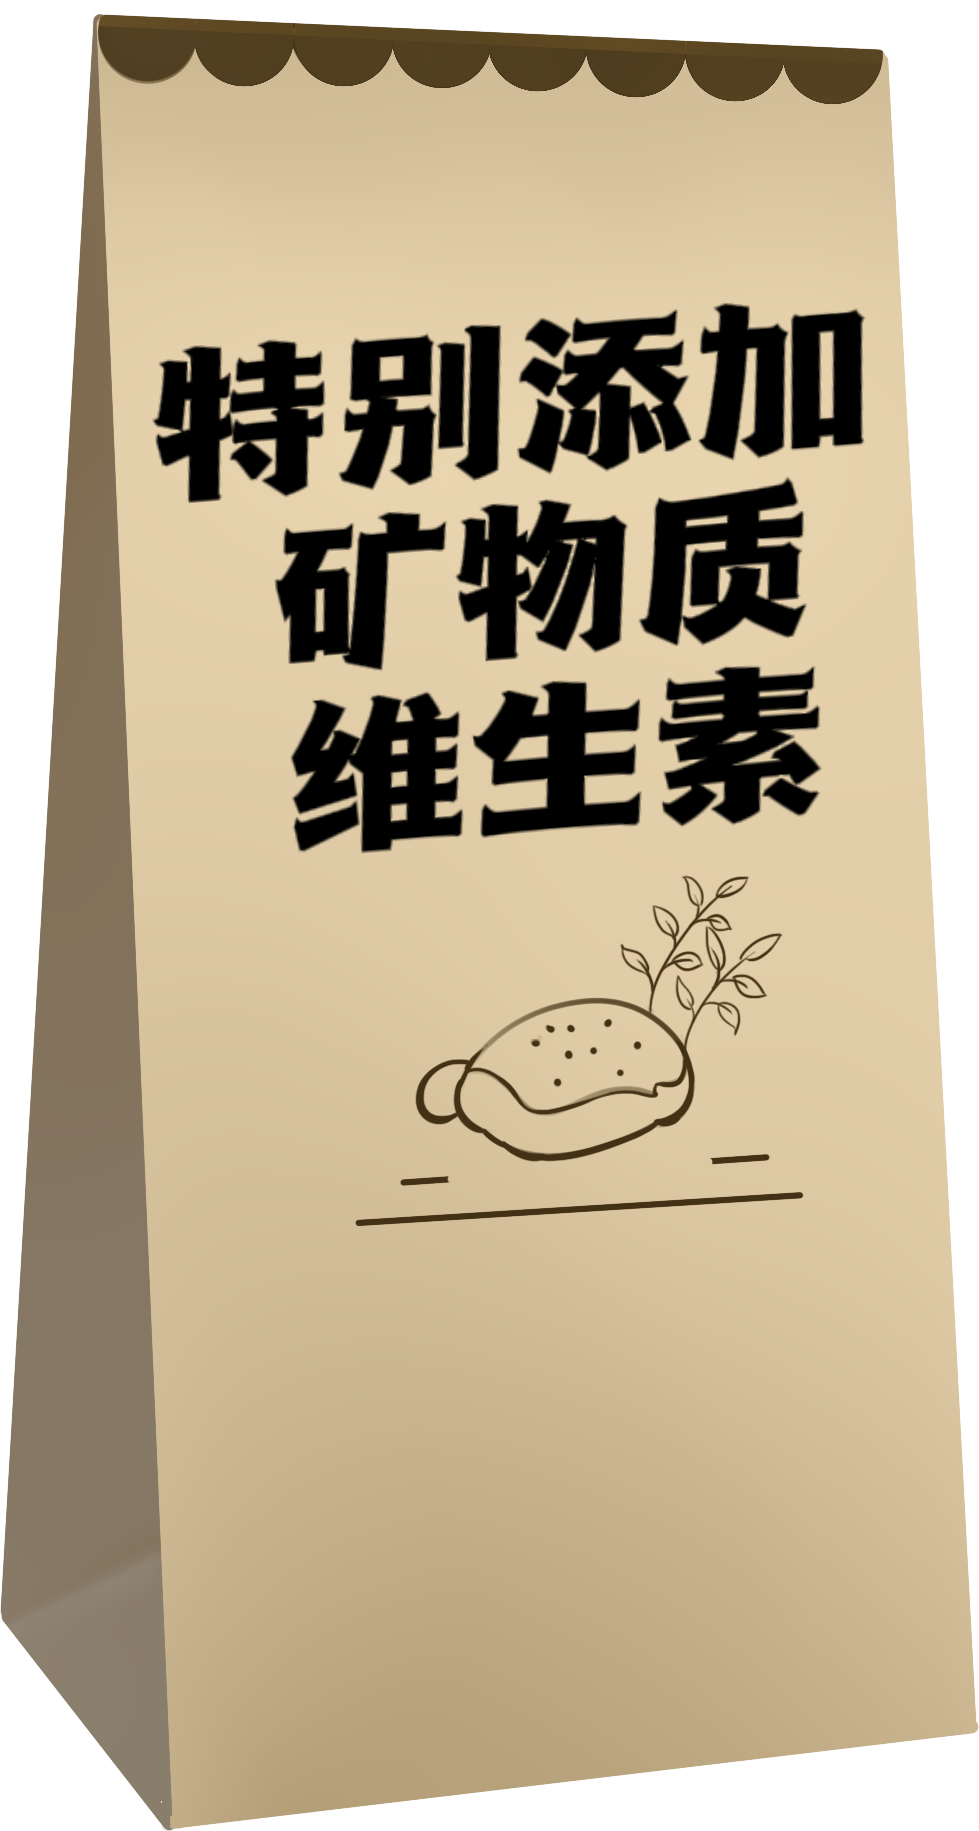 |
| Purchase Location | Near School | 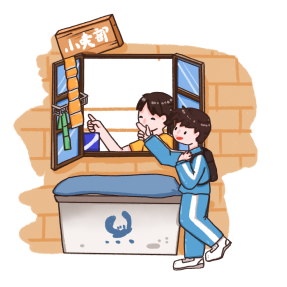 | Convenience  Store | 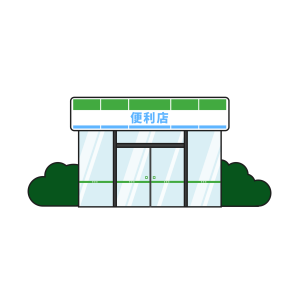 |
| Price | 5~9 ¥CNY | 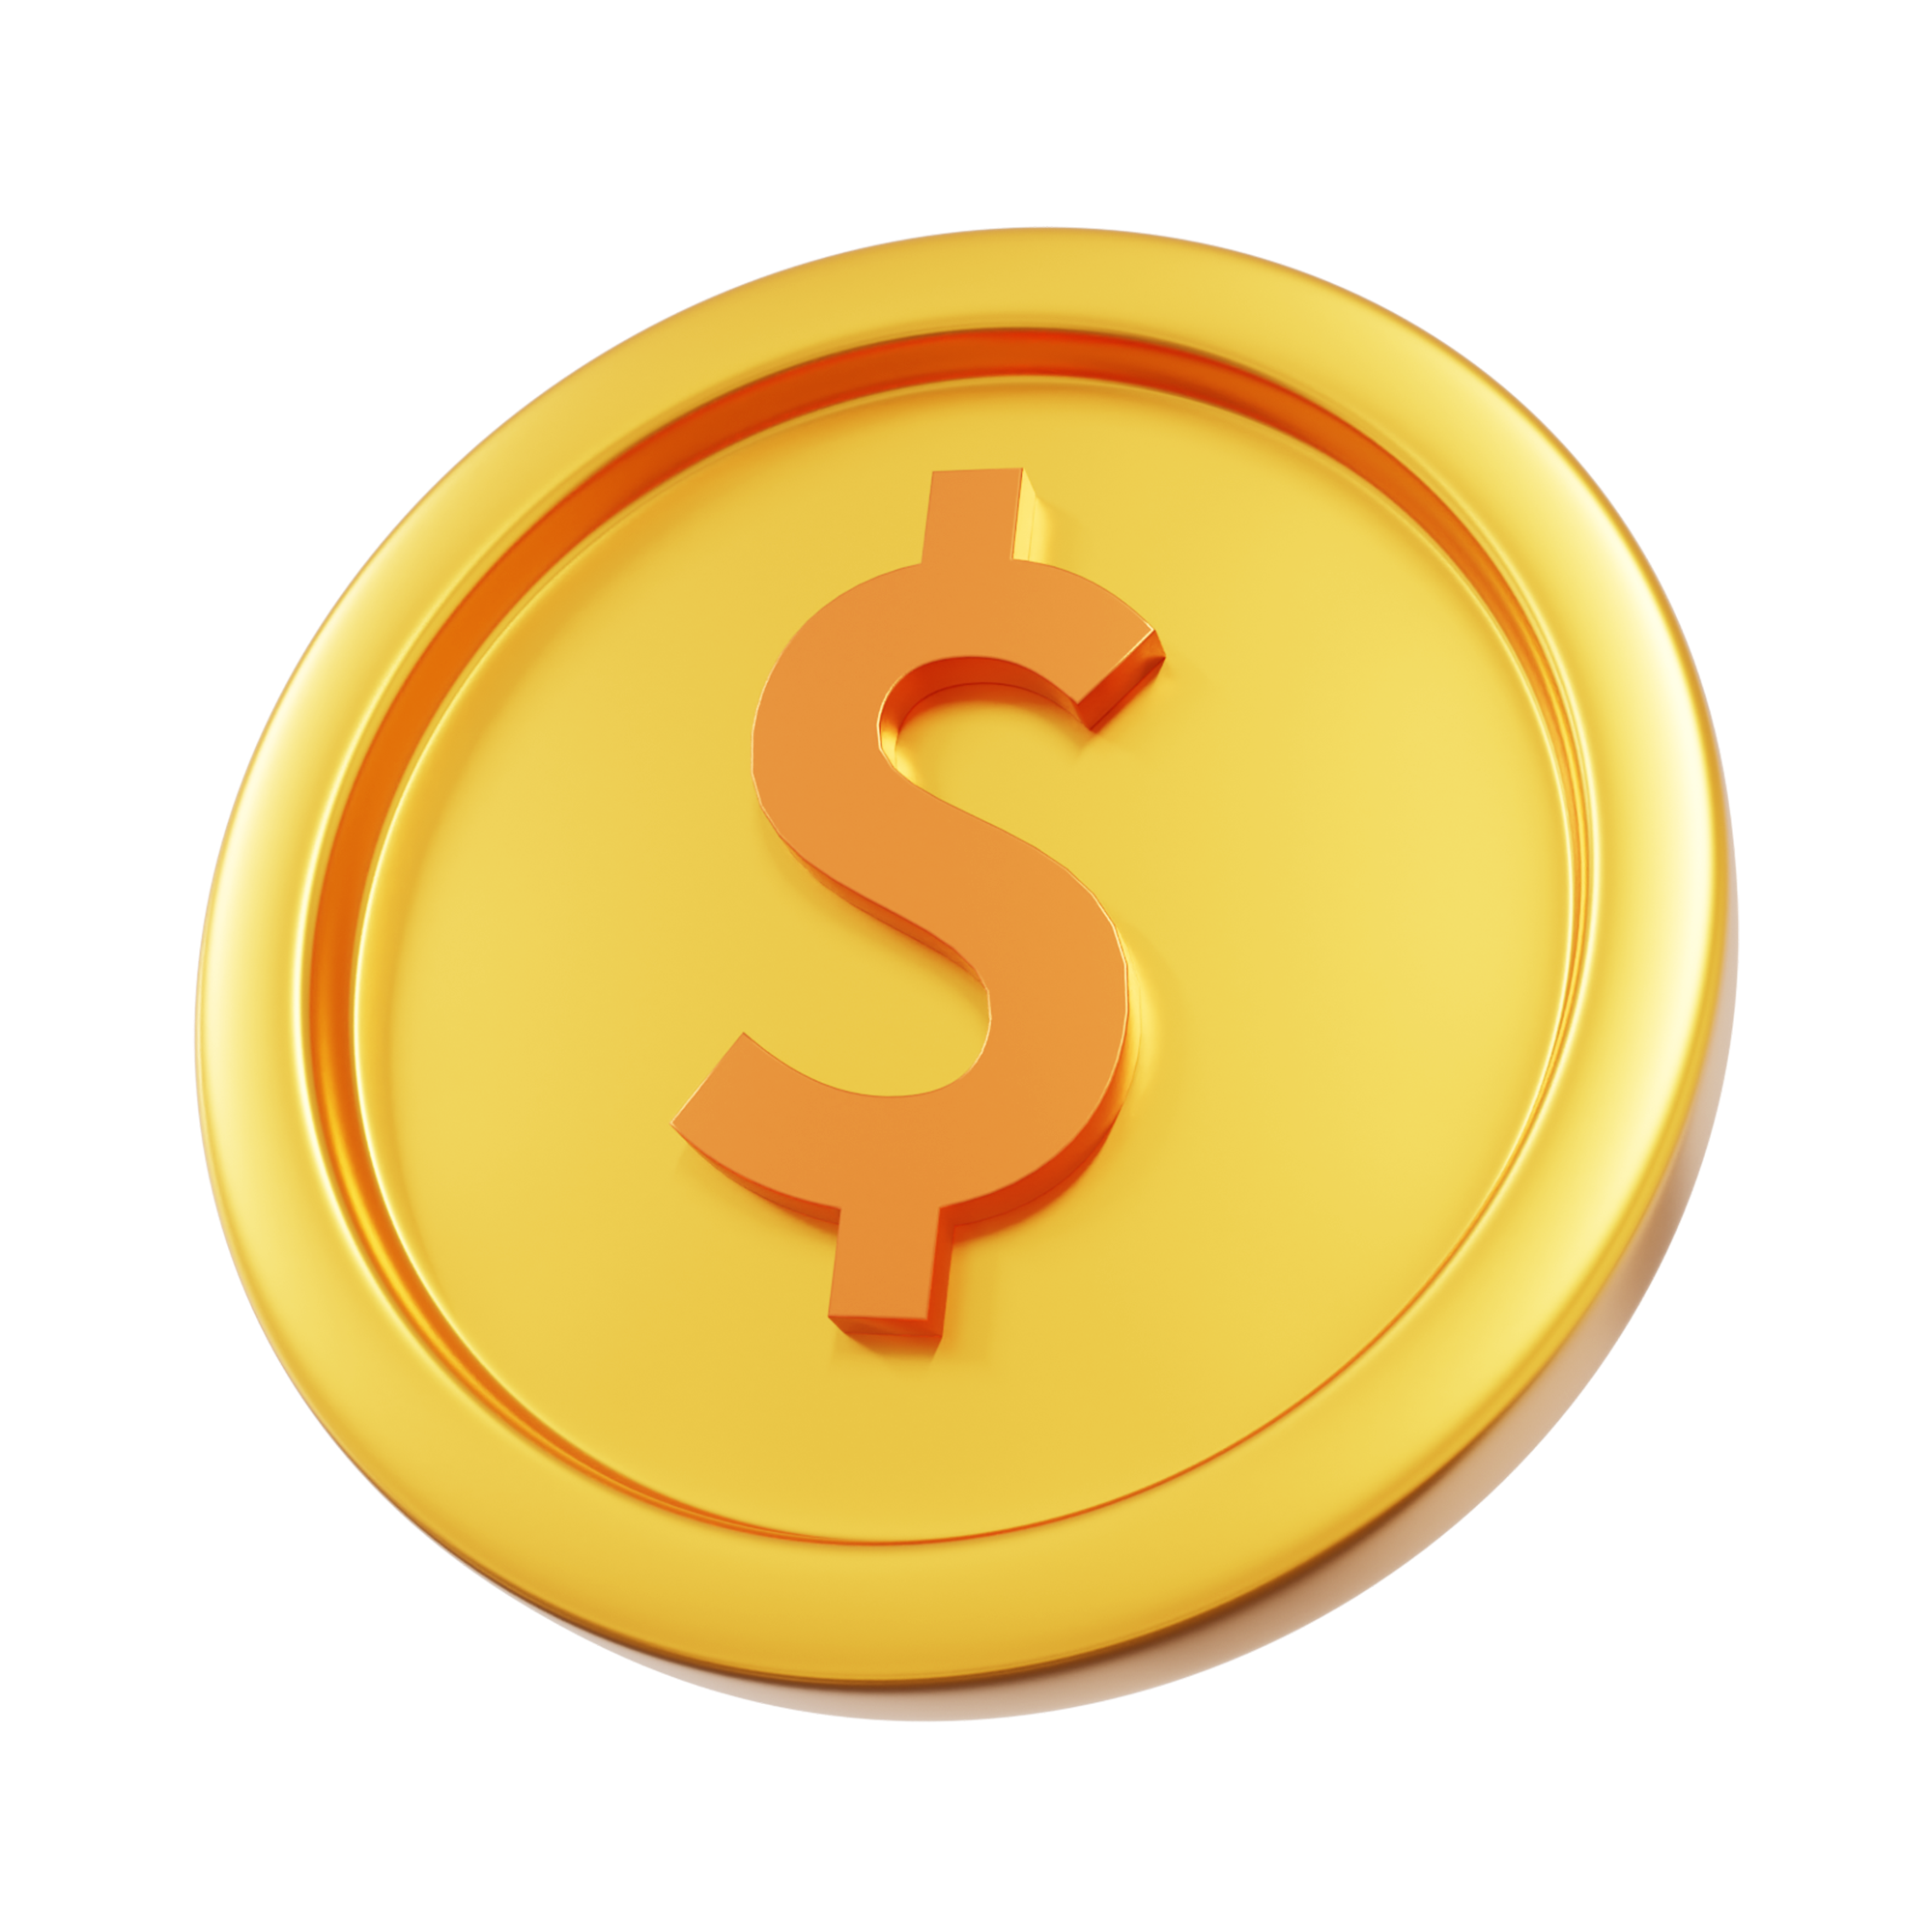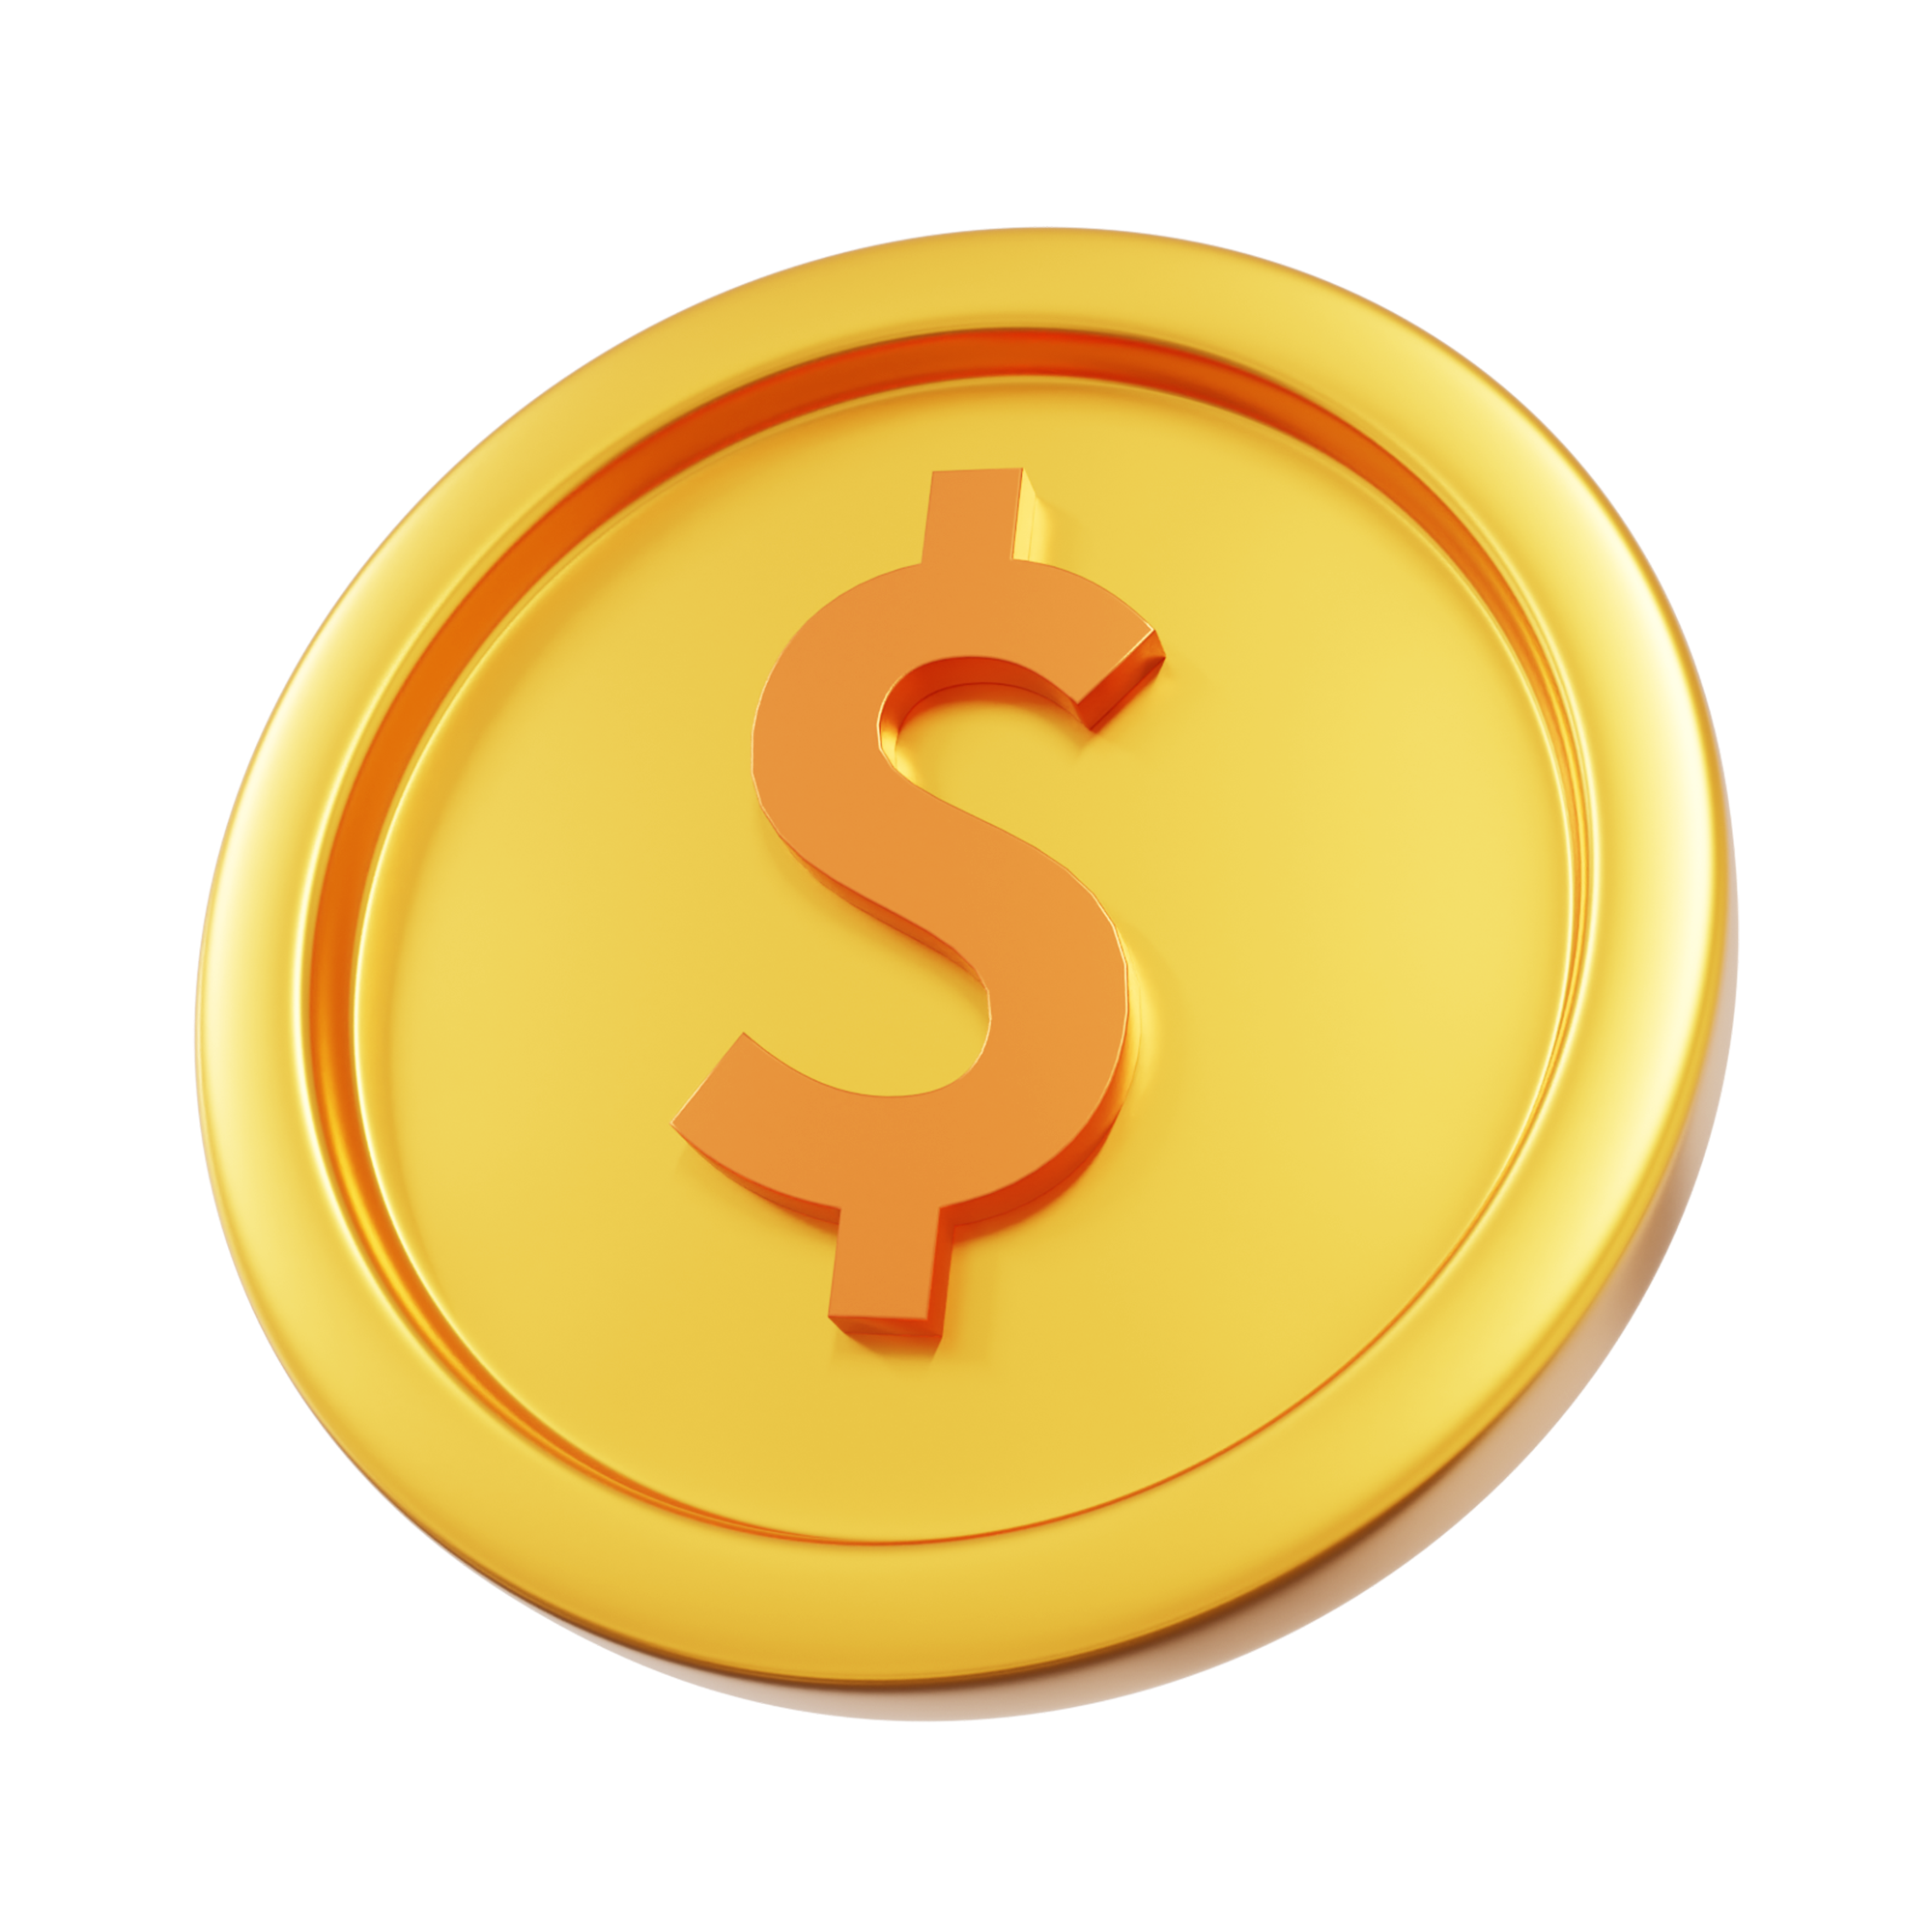 | ≥10 ¥CNY | 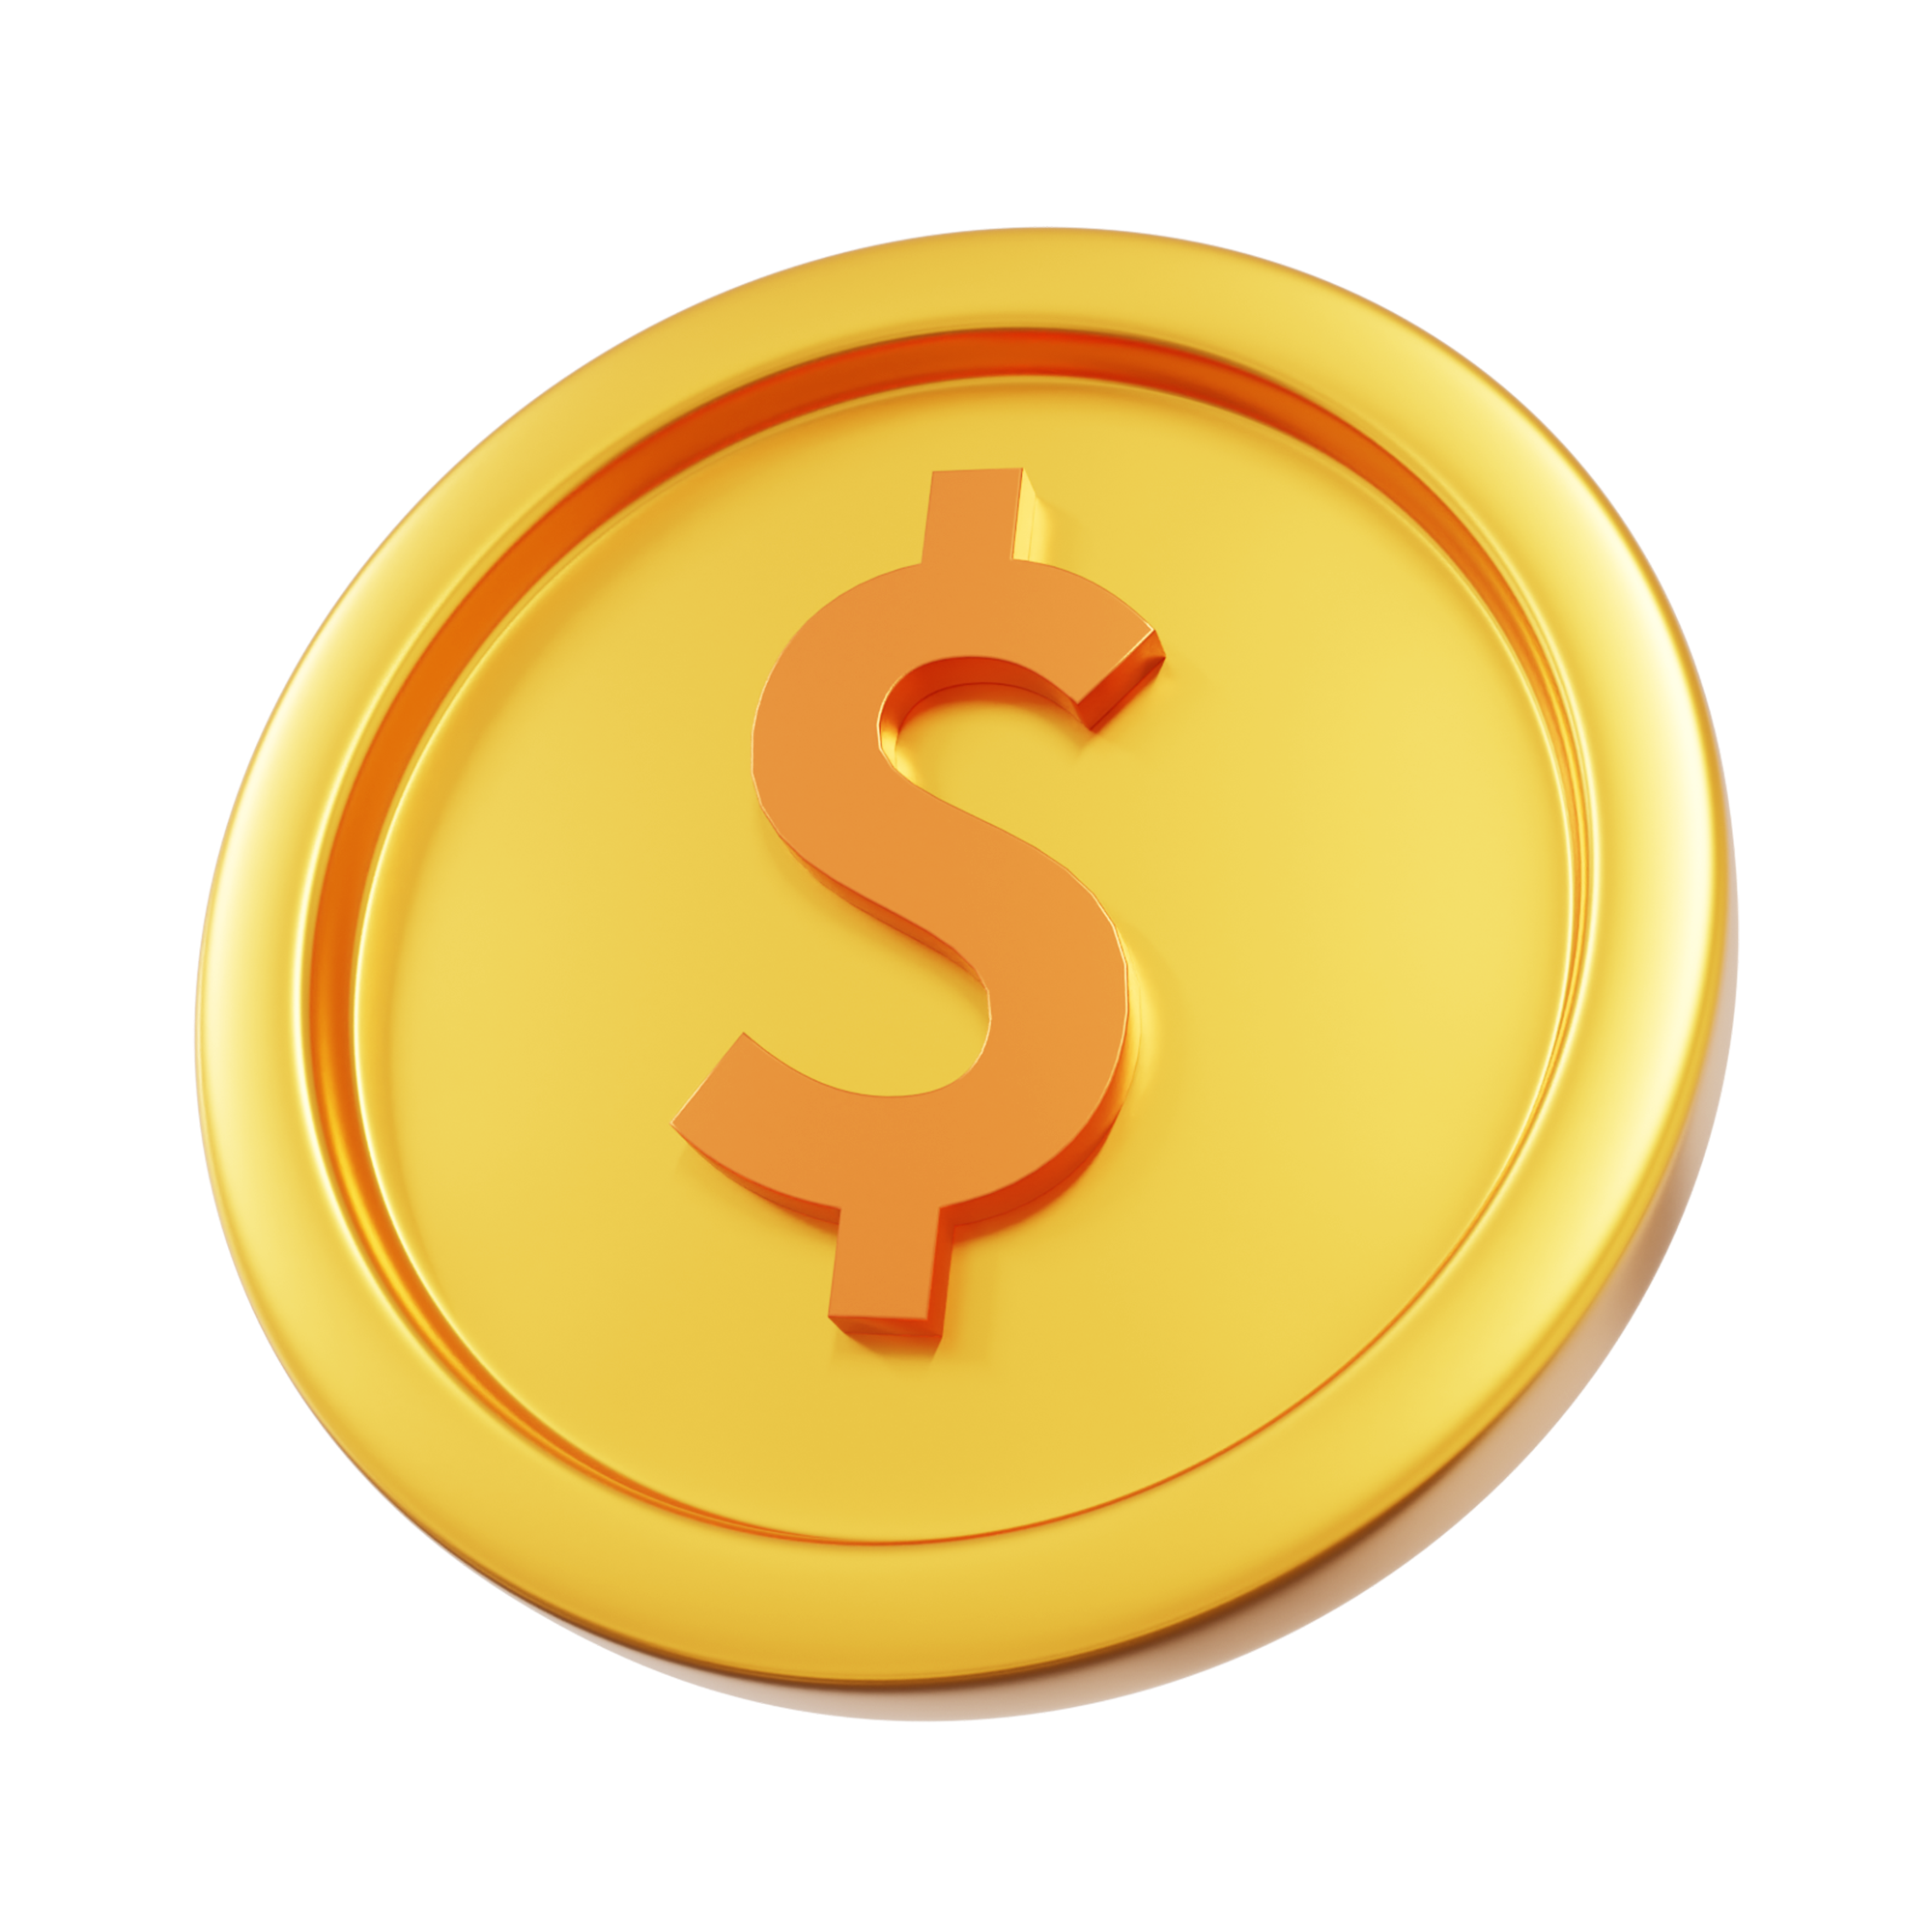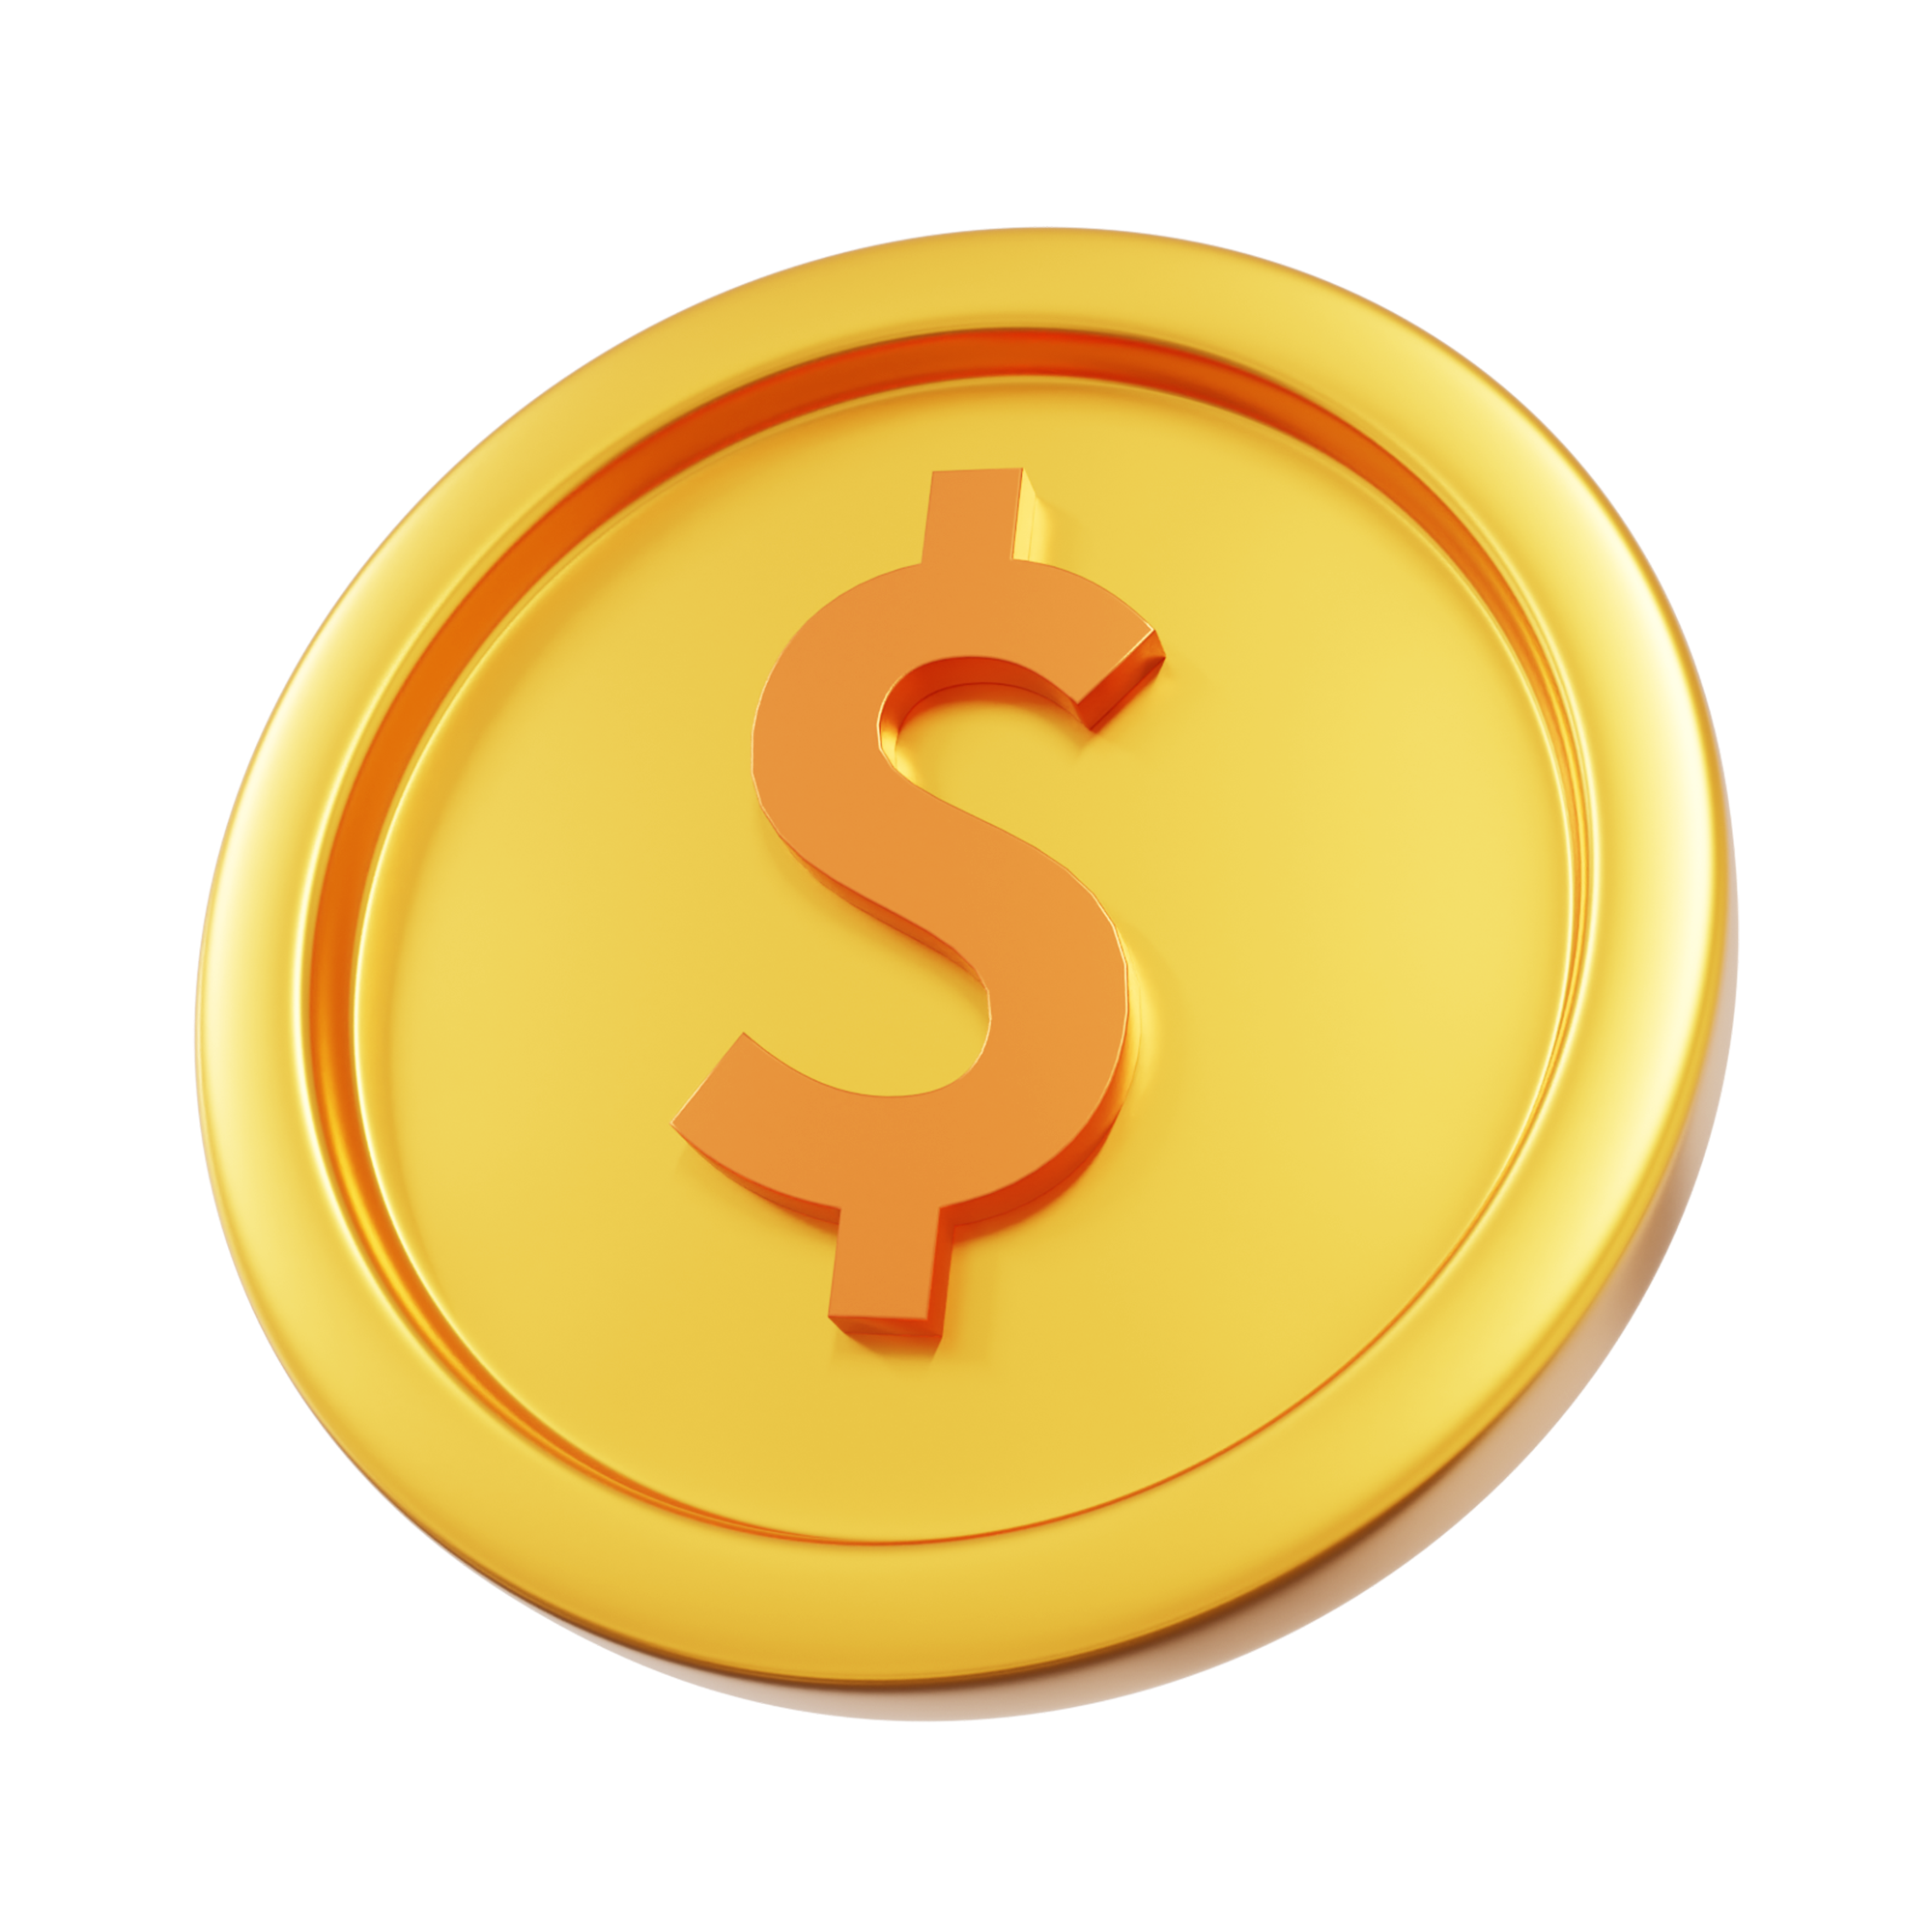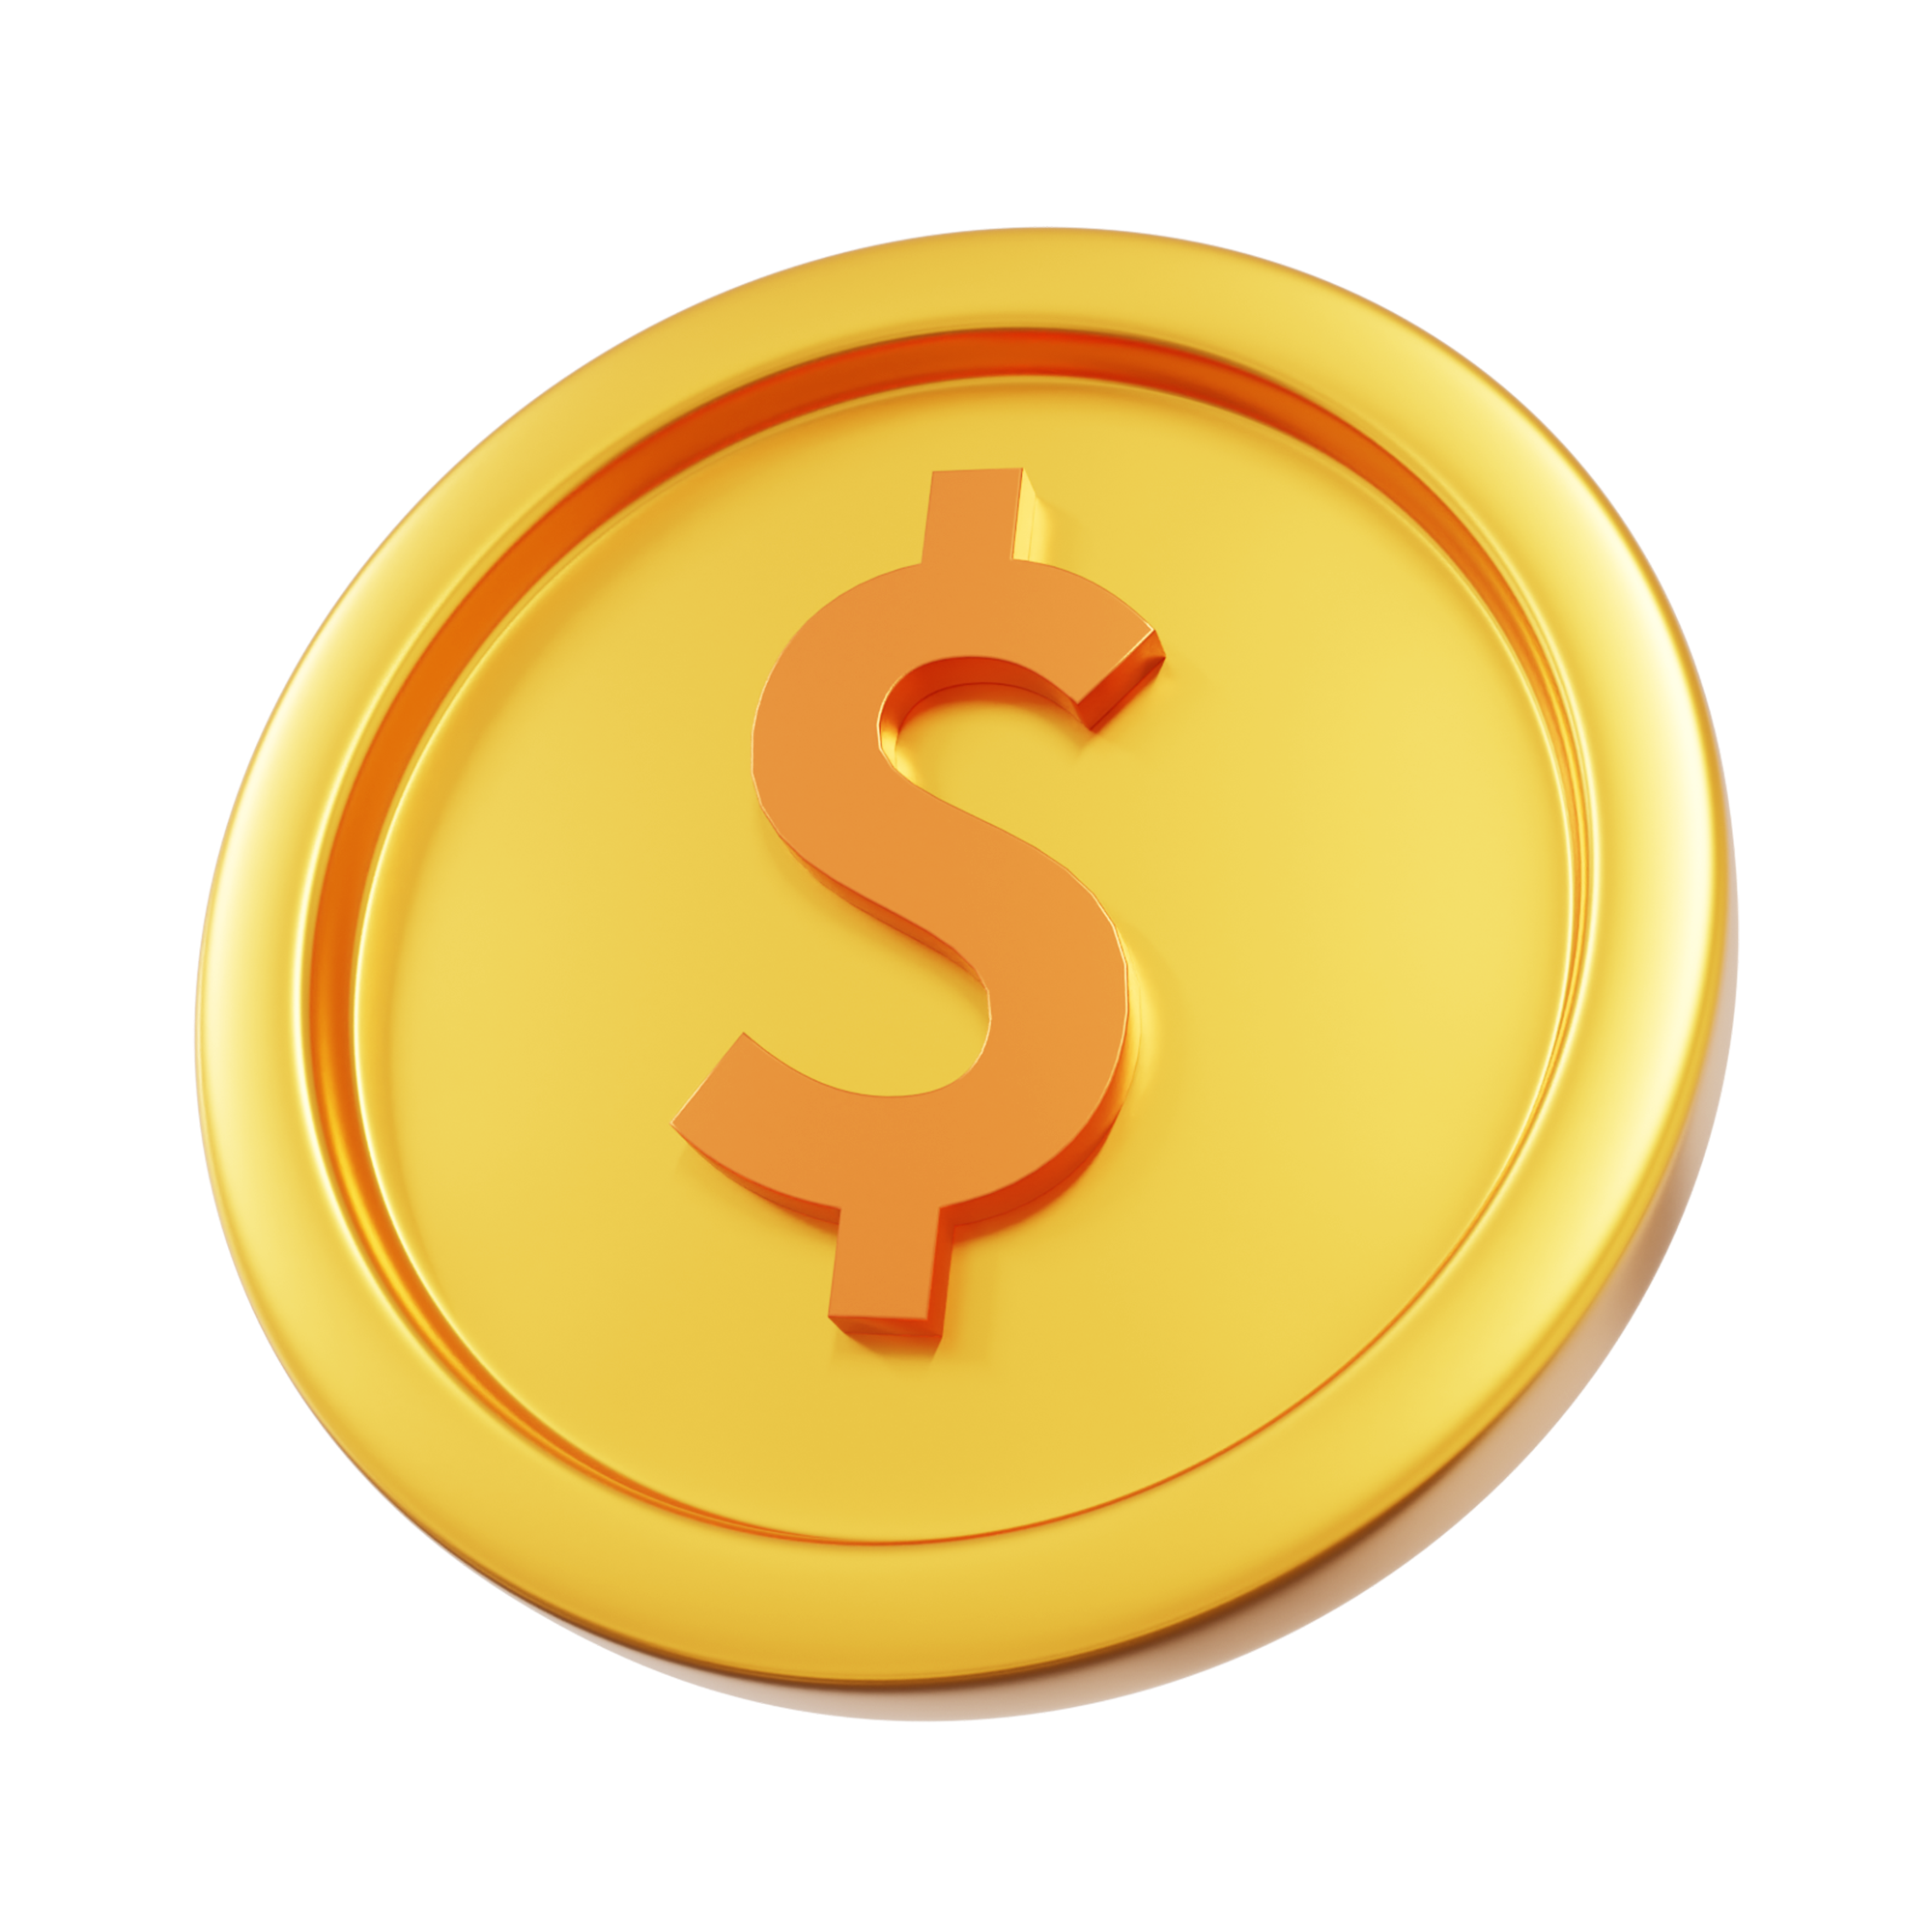 |
| Package Size | Small | 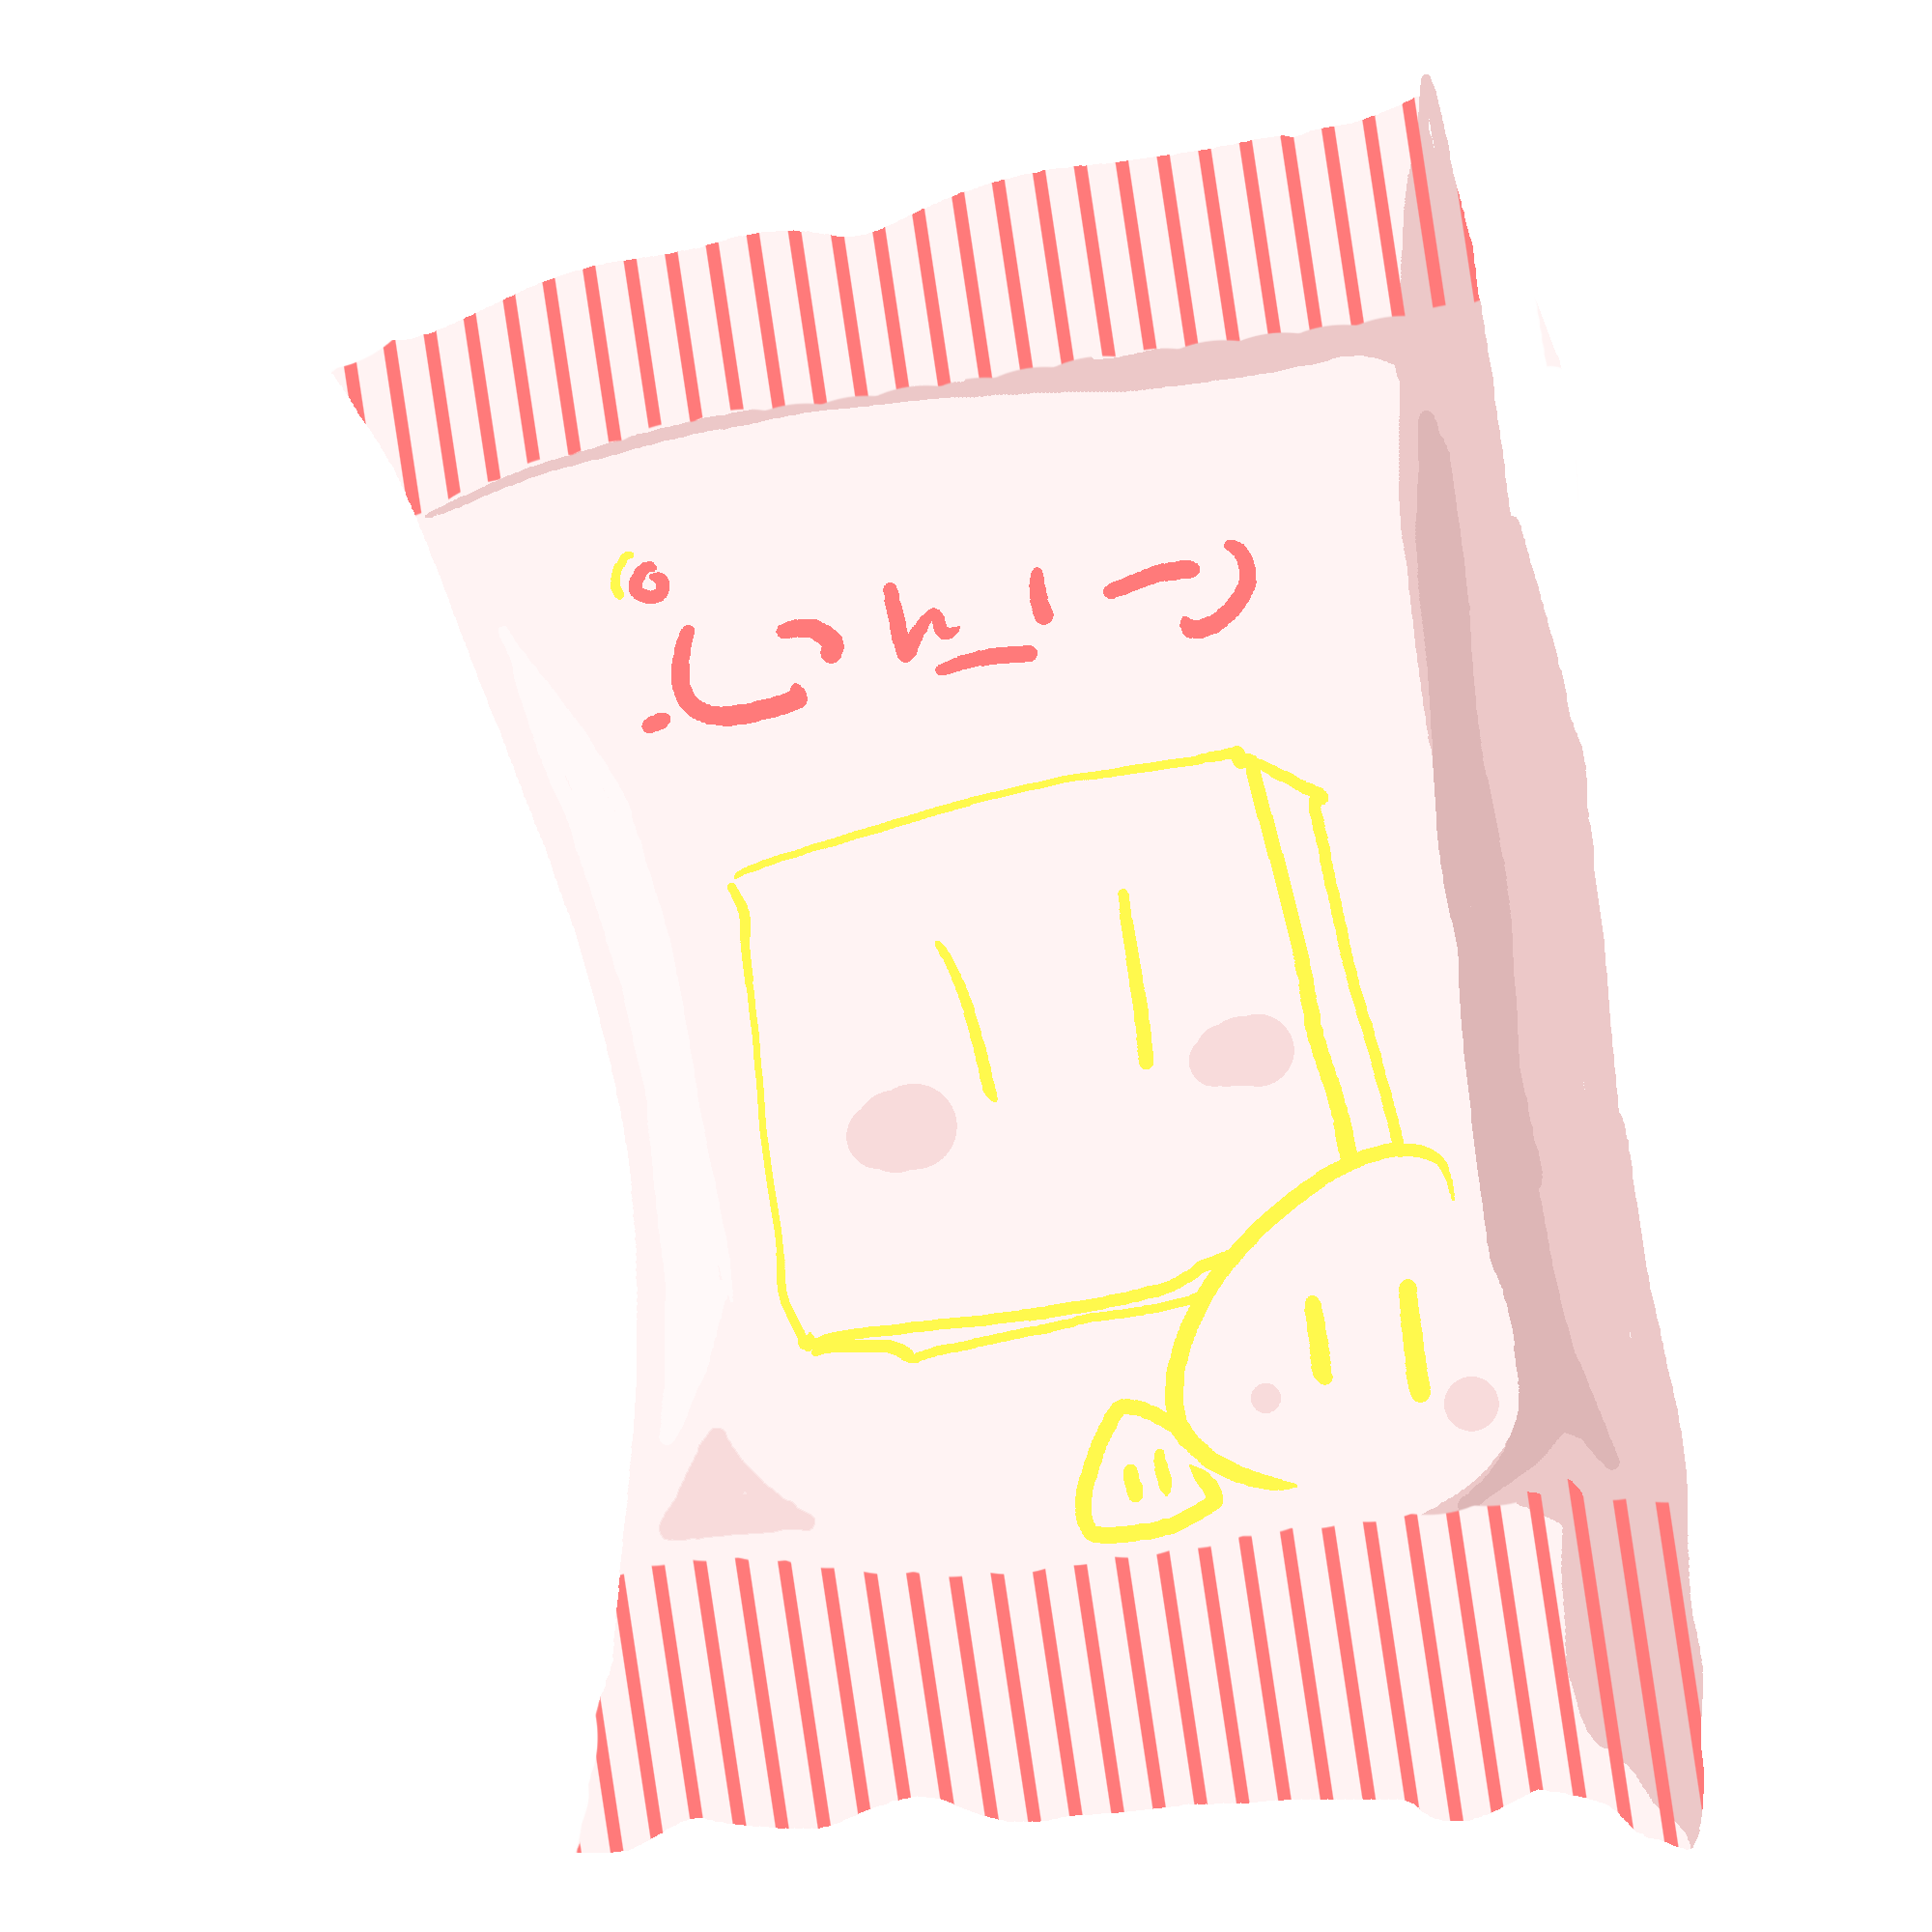 | Large | 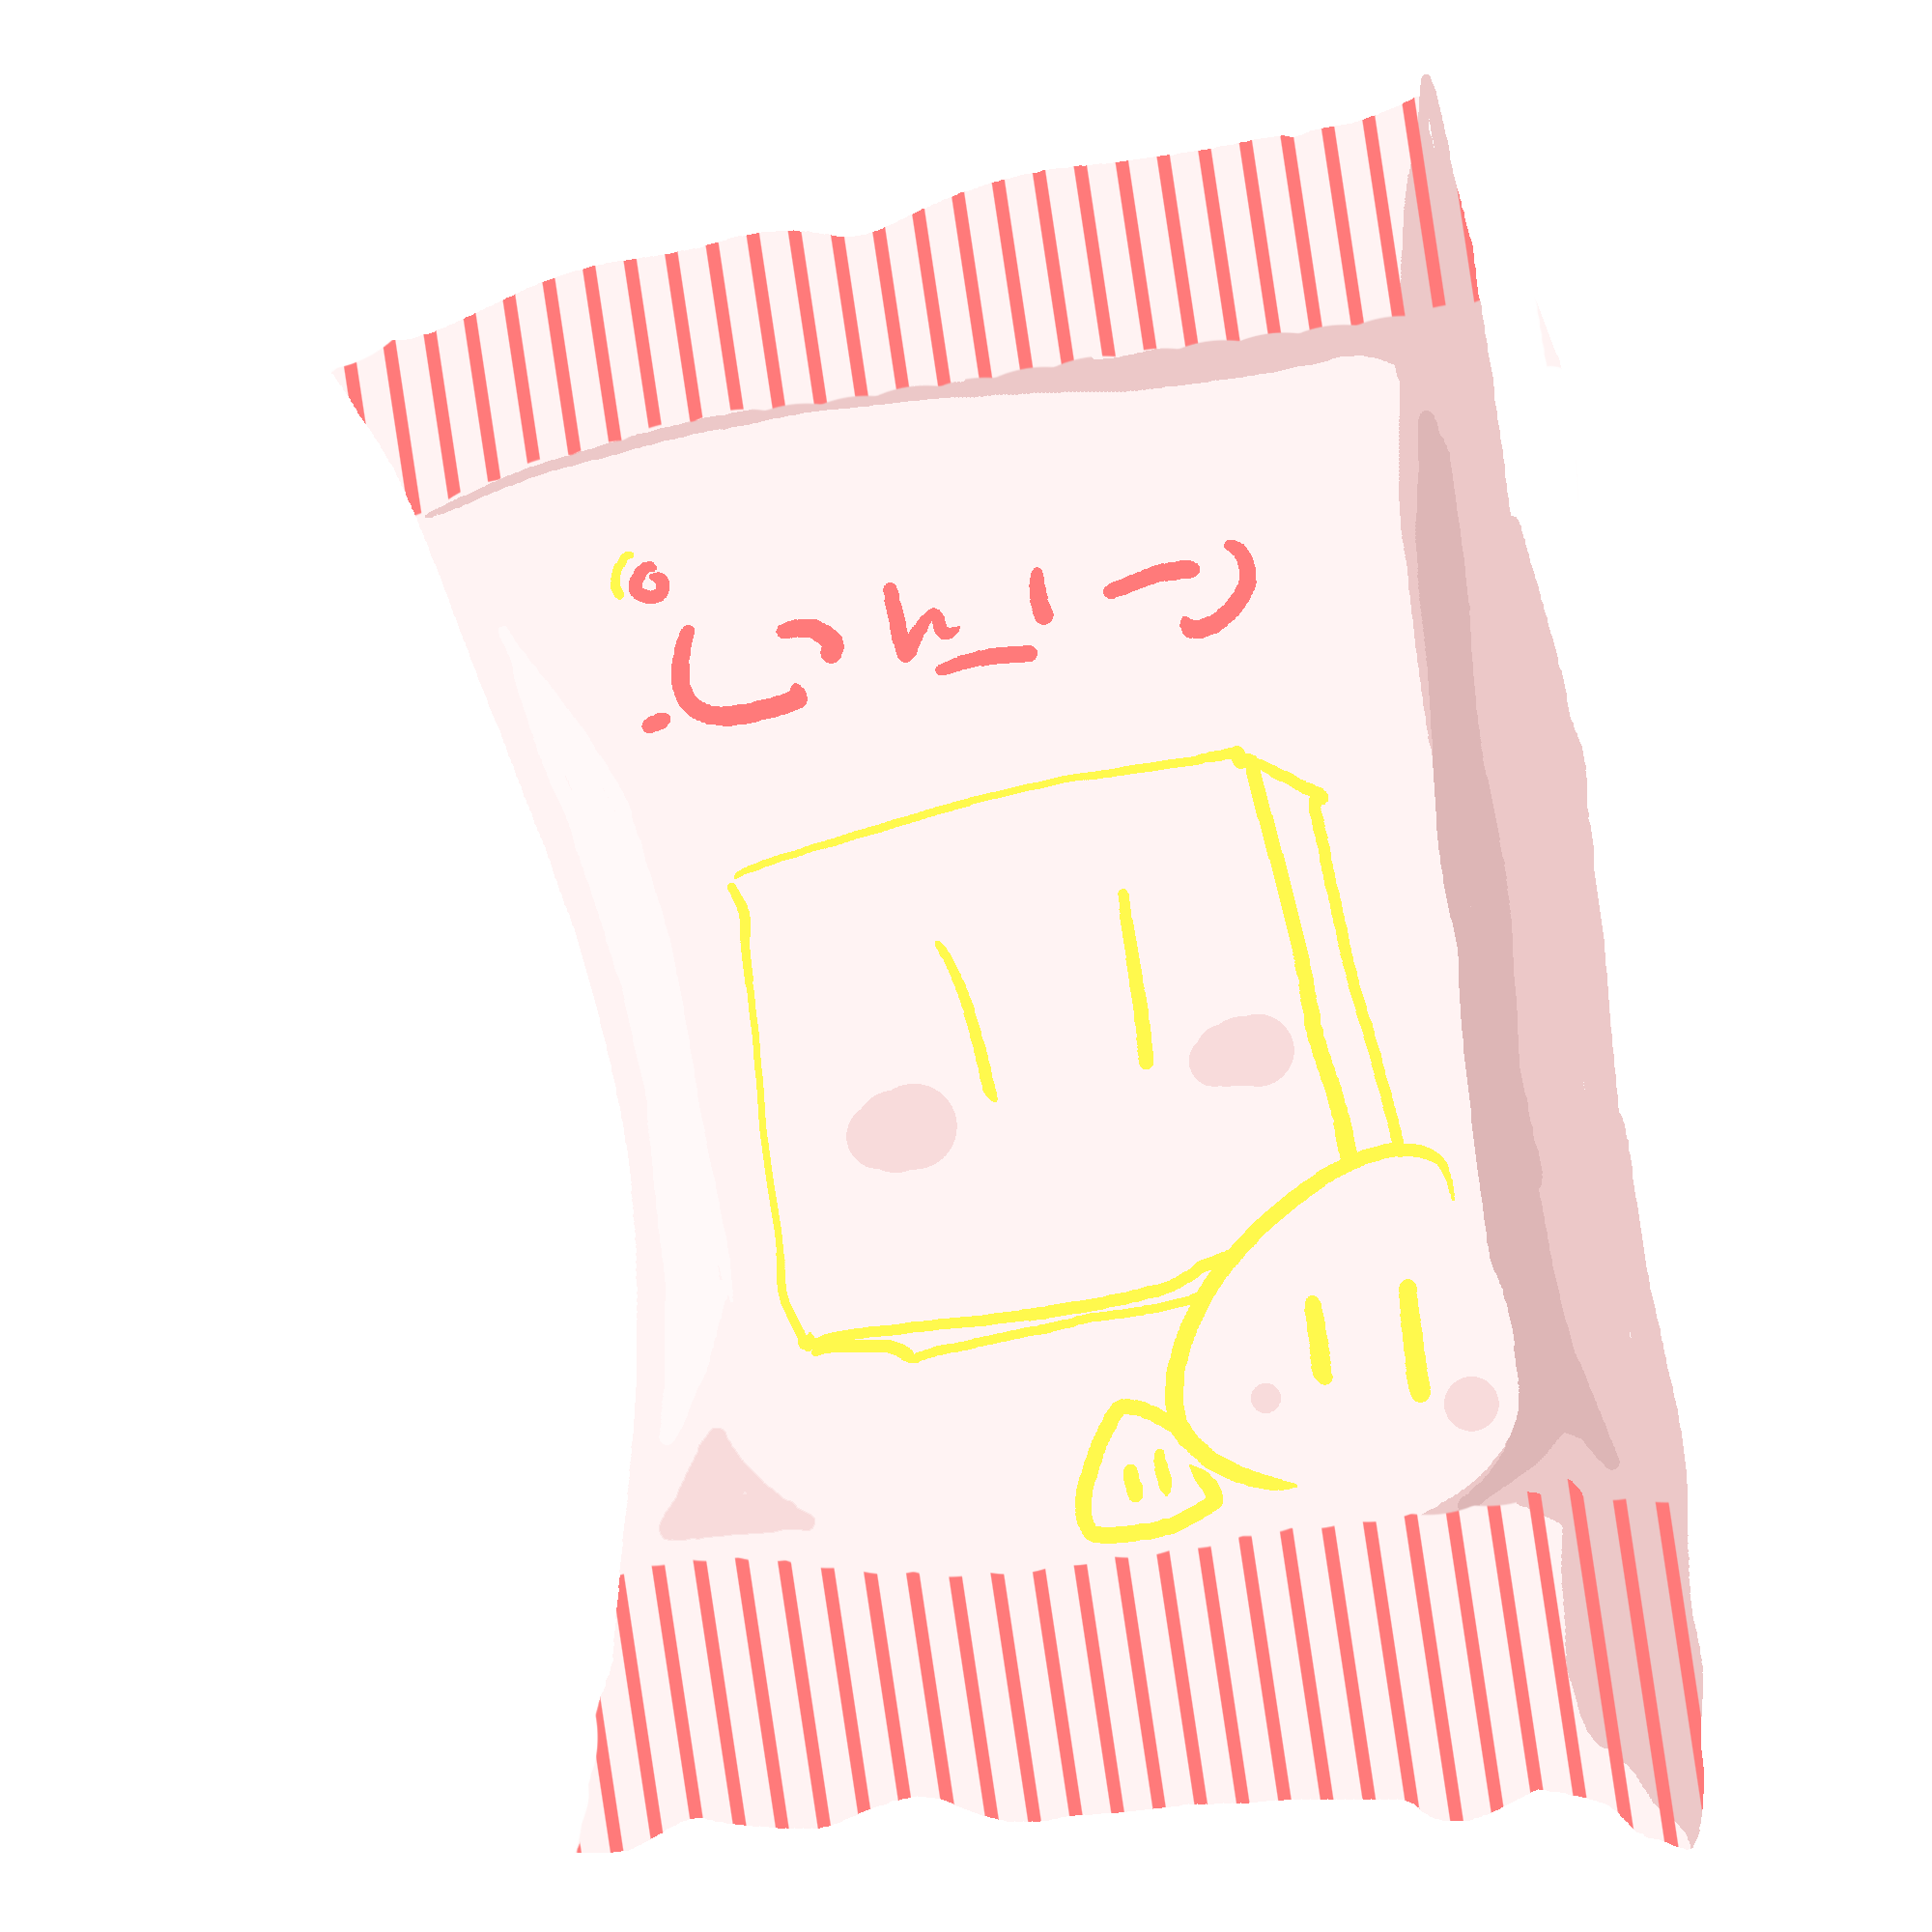 |
| Social Influence | Family Consumption Habits | 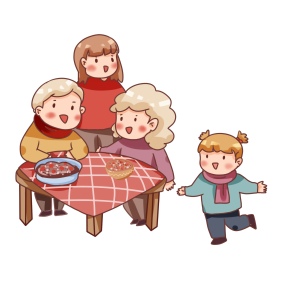 | Advertising/ Influencer Recommendations | 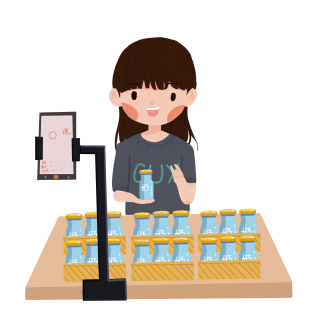 |
| Which option would you be more willing to choose | Snack A □ | | Snack B □ | |
| Considering your daily diet, would you consume this snack in real life?  Yes□ No□ | | | | |

Choice Set 3/8

| Snack Attributes | SnackA | | SnackB | |
| --- | --- | --- | --- | --- |
| Taste | Spicy  Flavor | 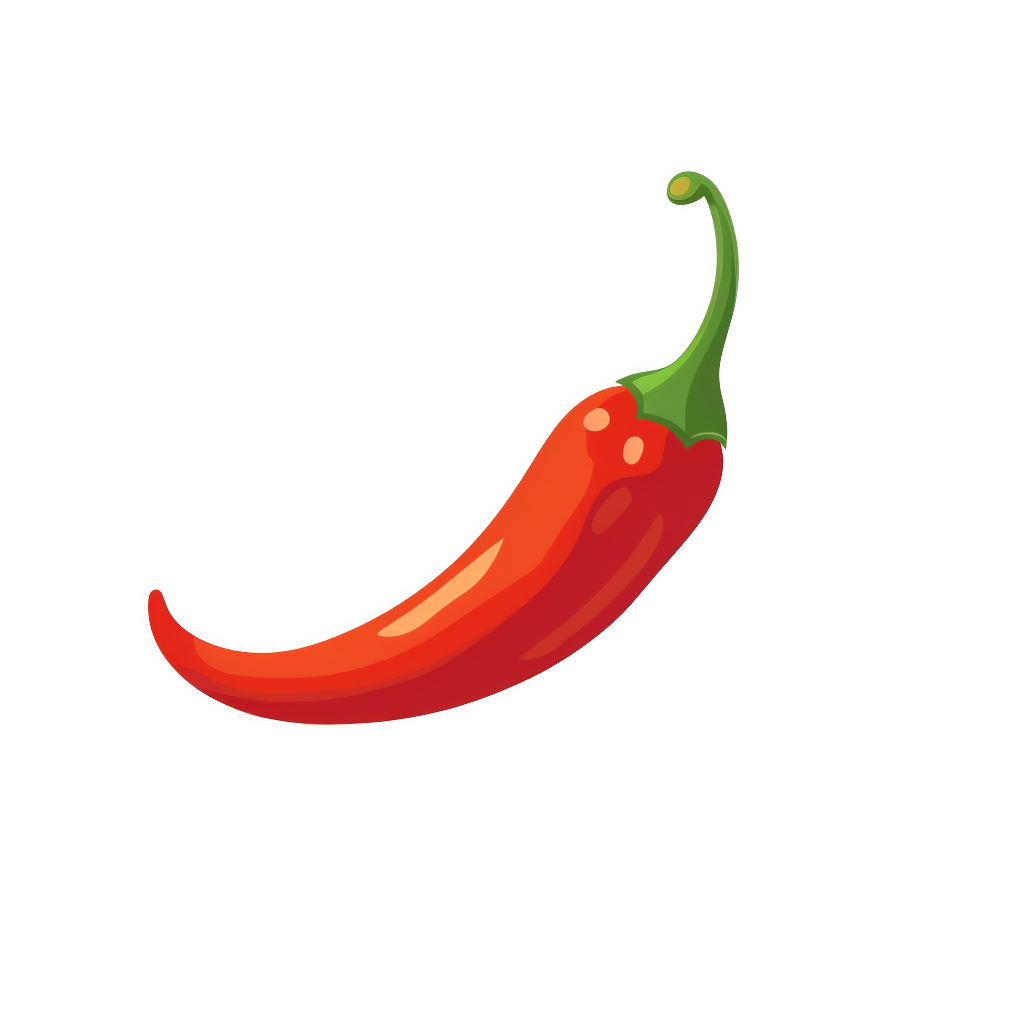 | Original Flavor | 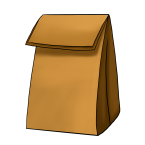 |
| Nutrient Claims | Low Fat | 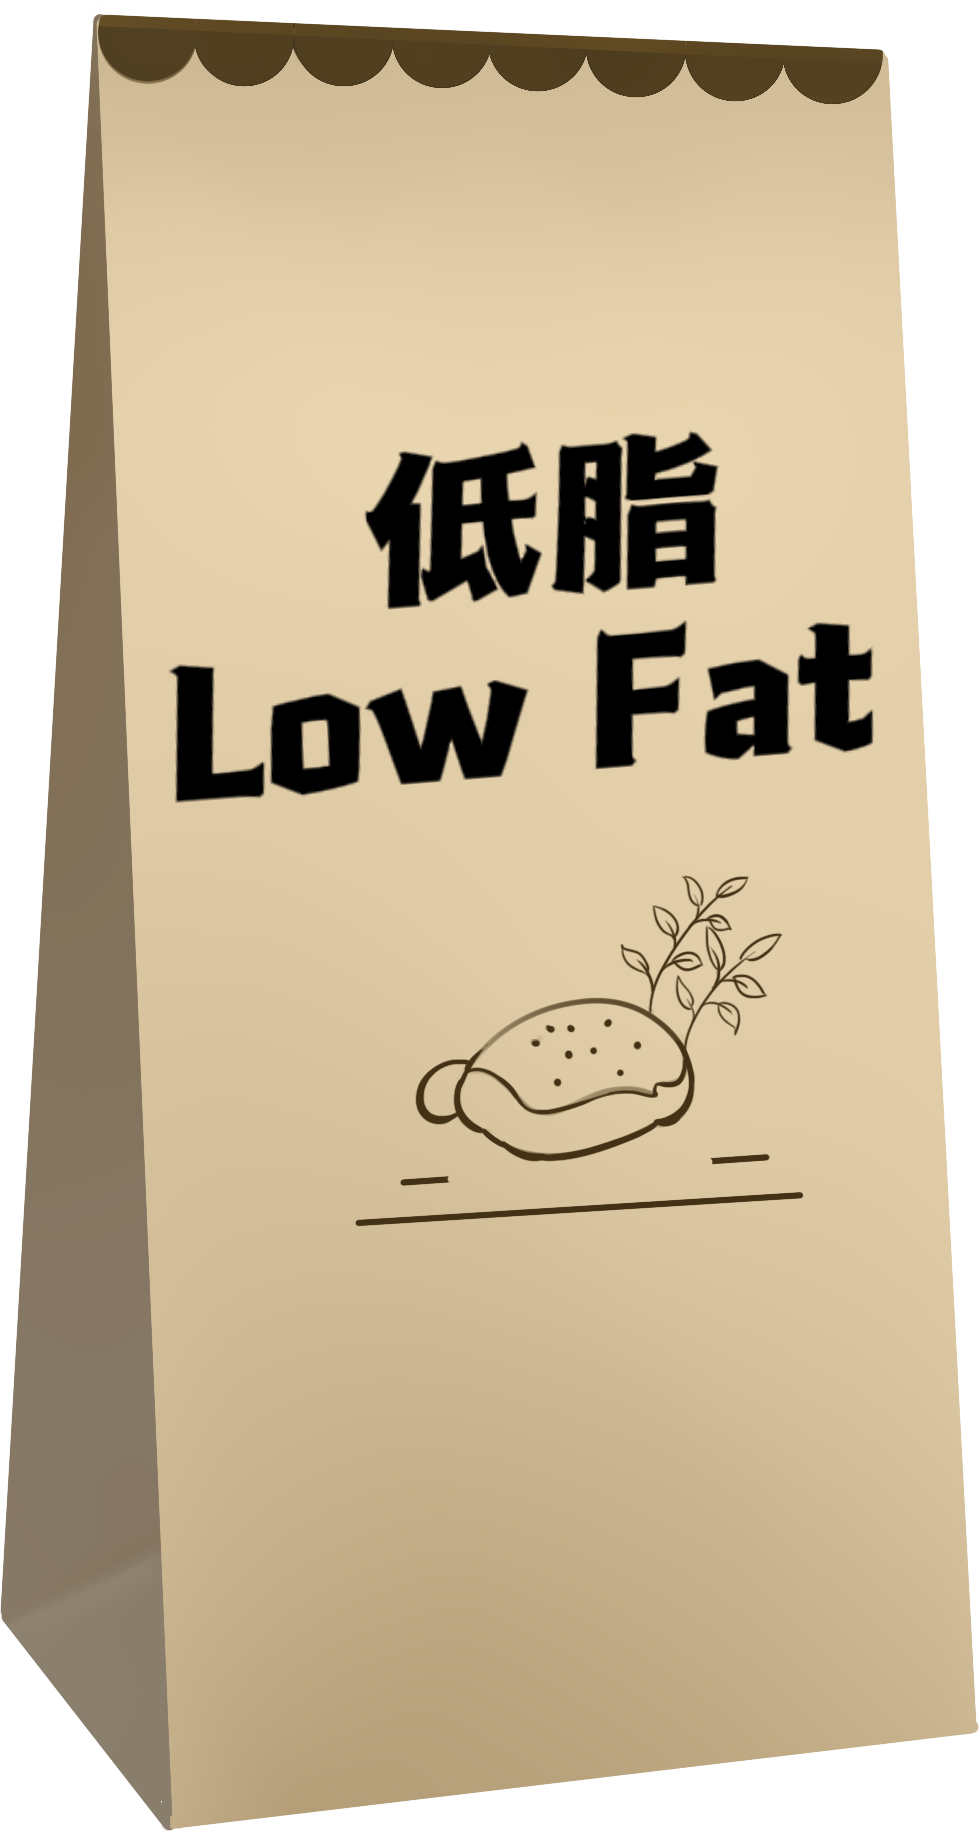 | None | 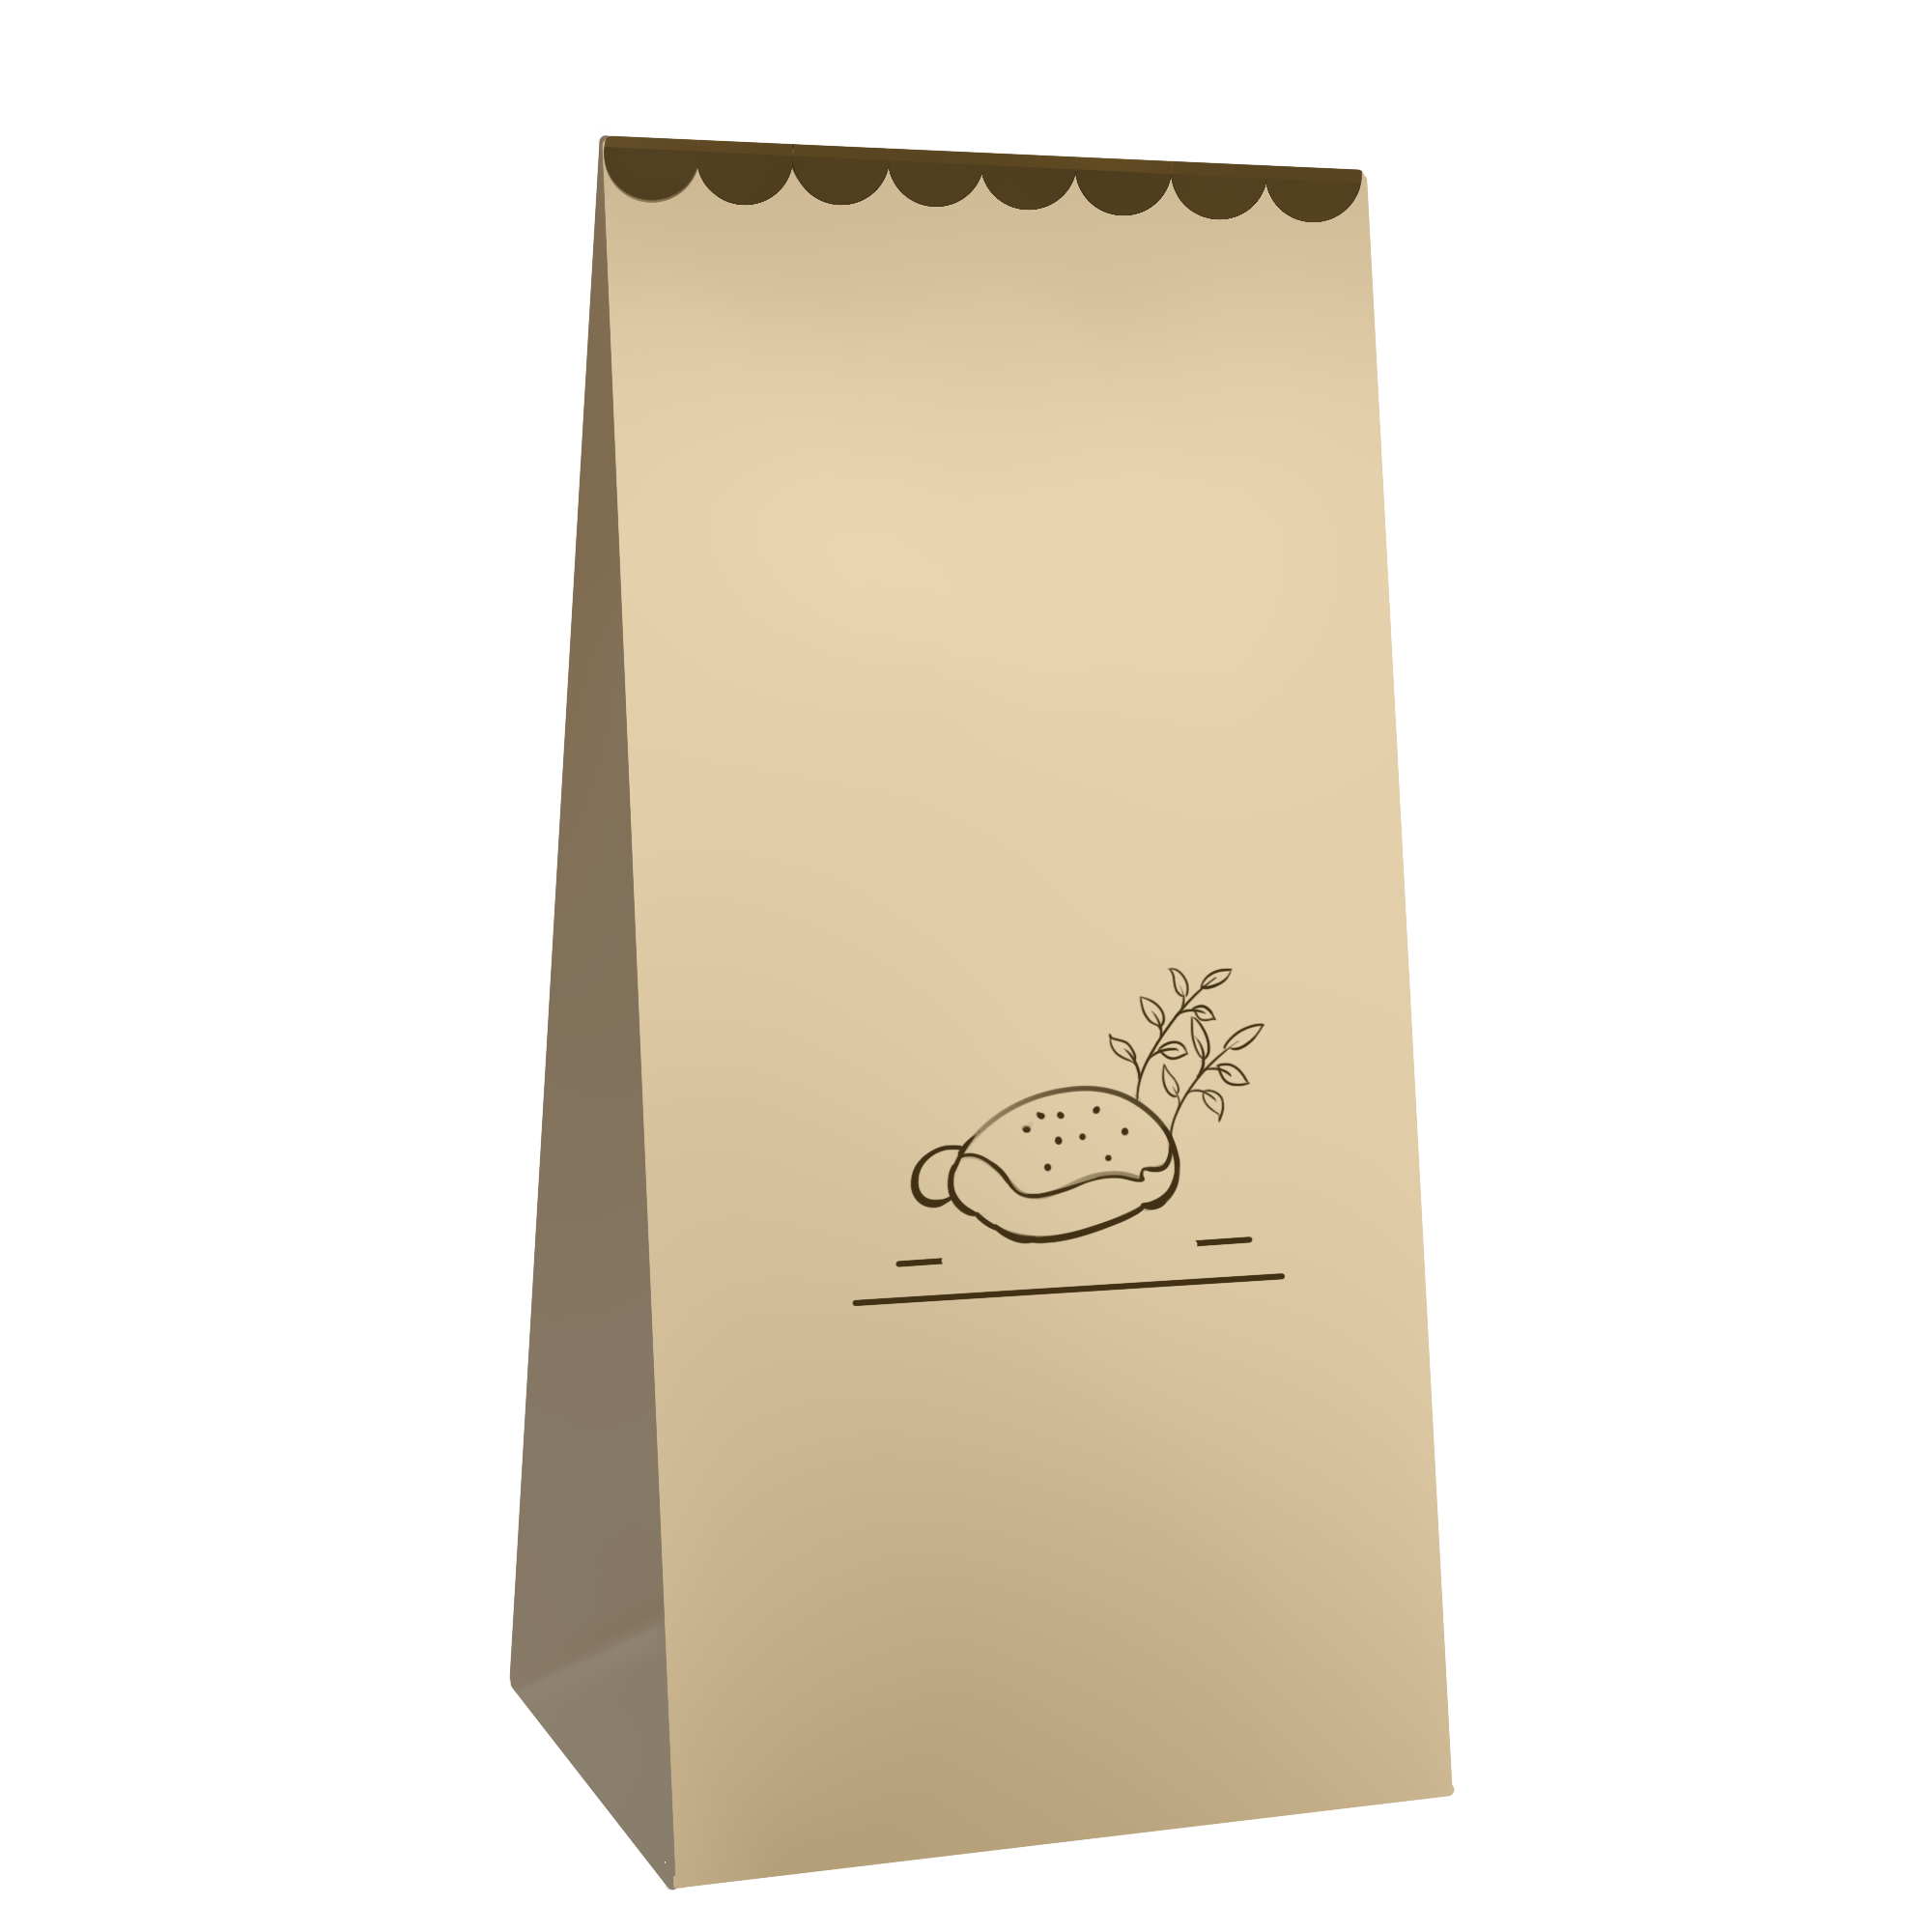 |
| Purchase Location | Supermarket/ Hypermarket | 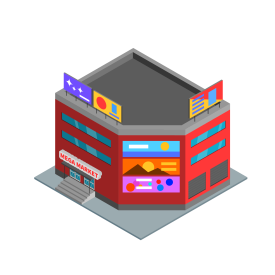 | Near School | 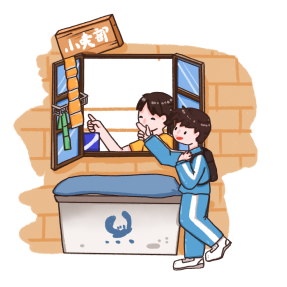 |
| Price | ≥10 ¥CNY | 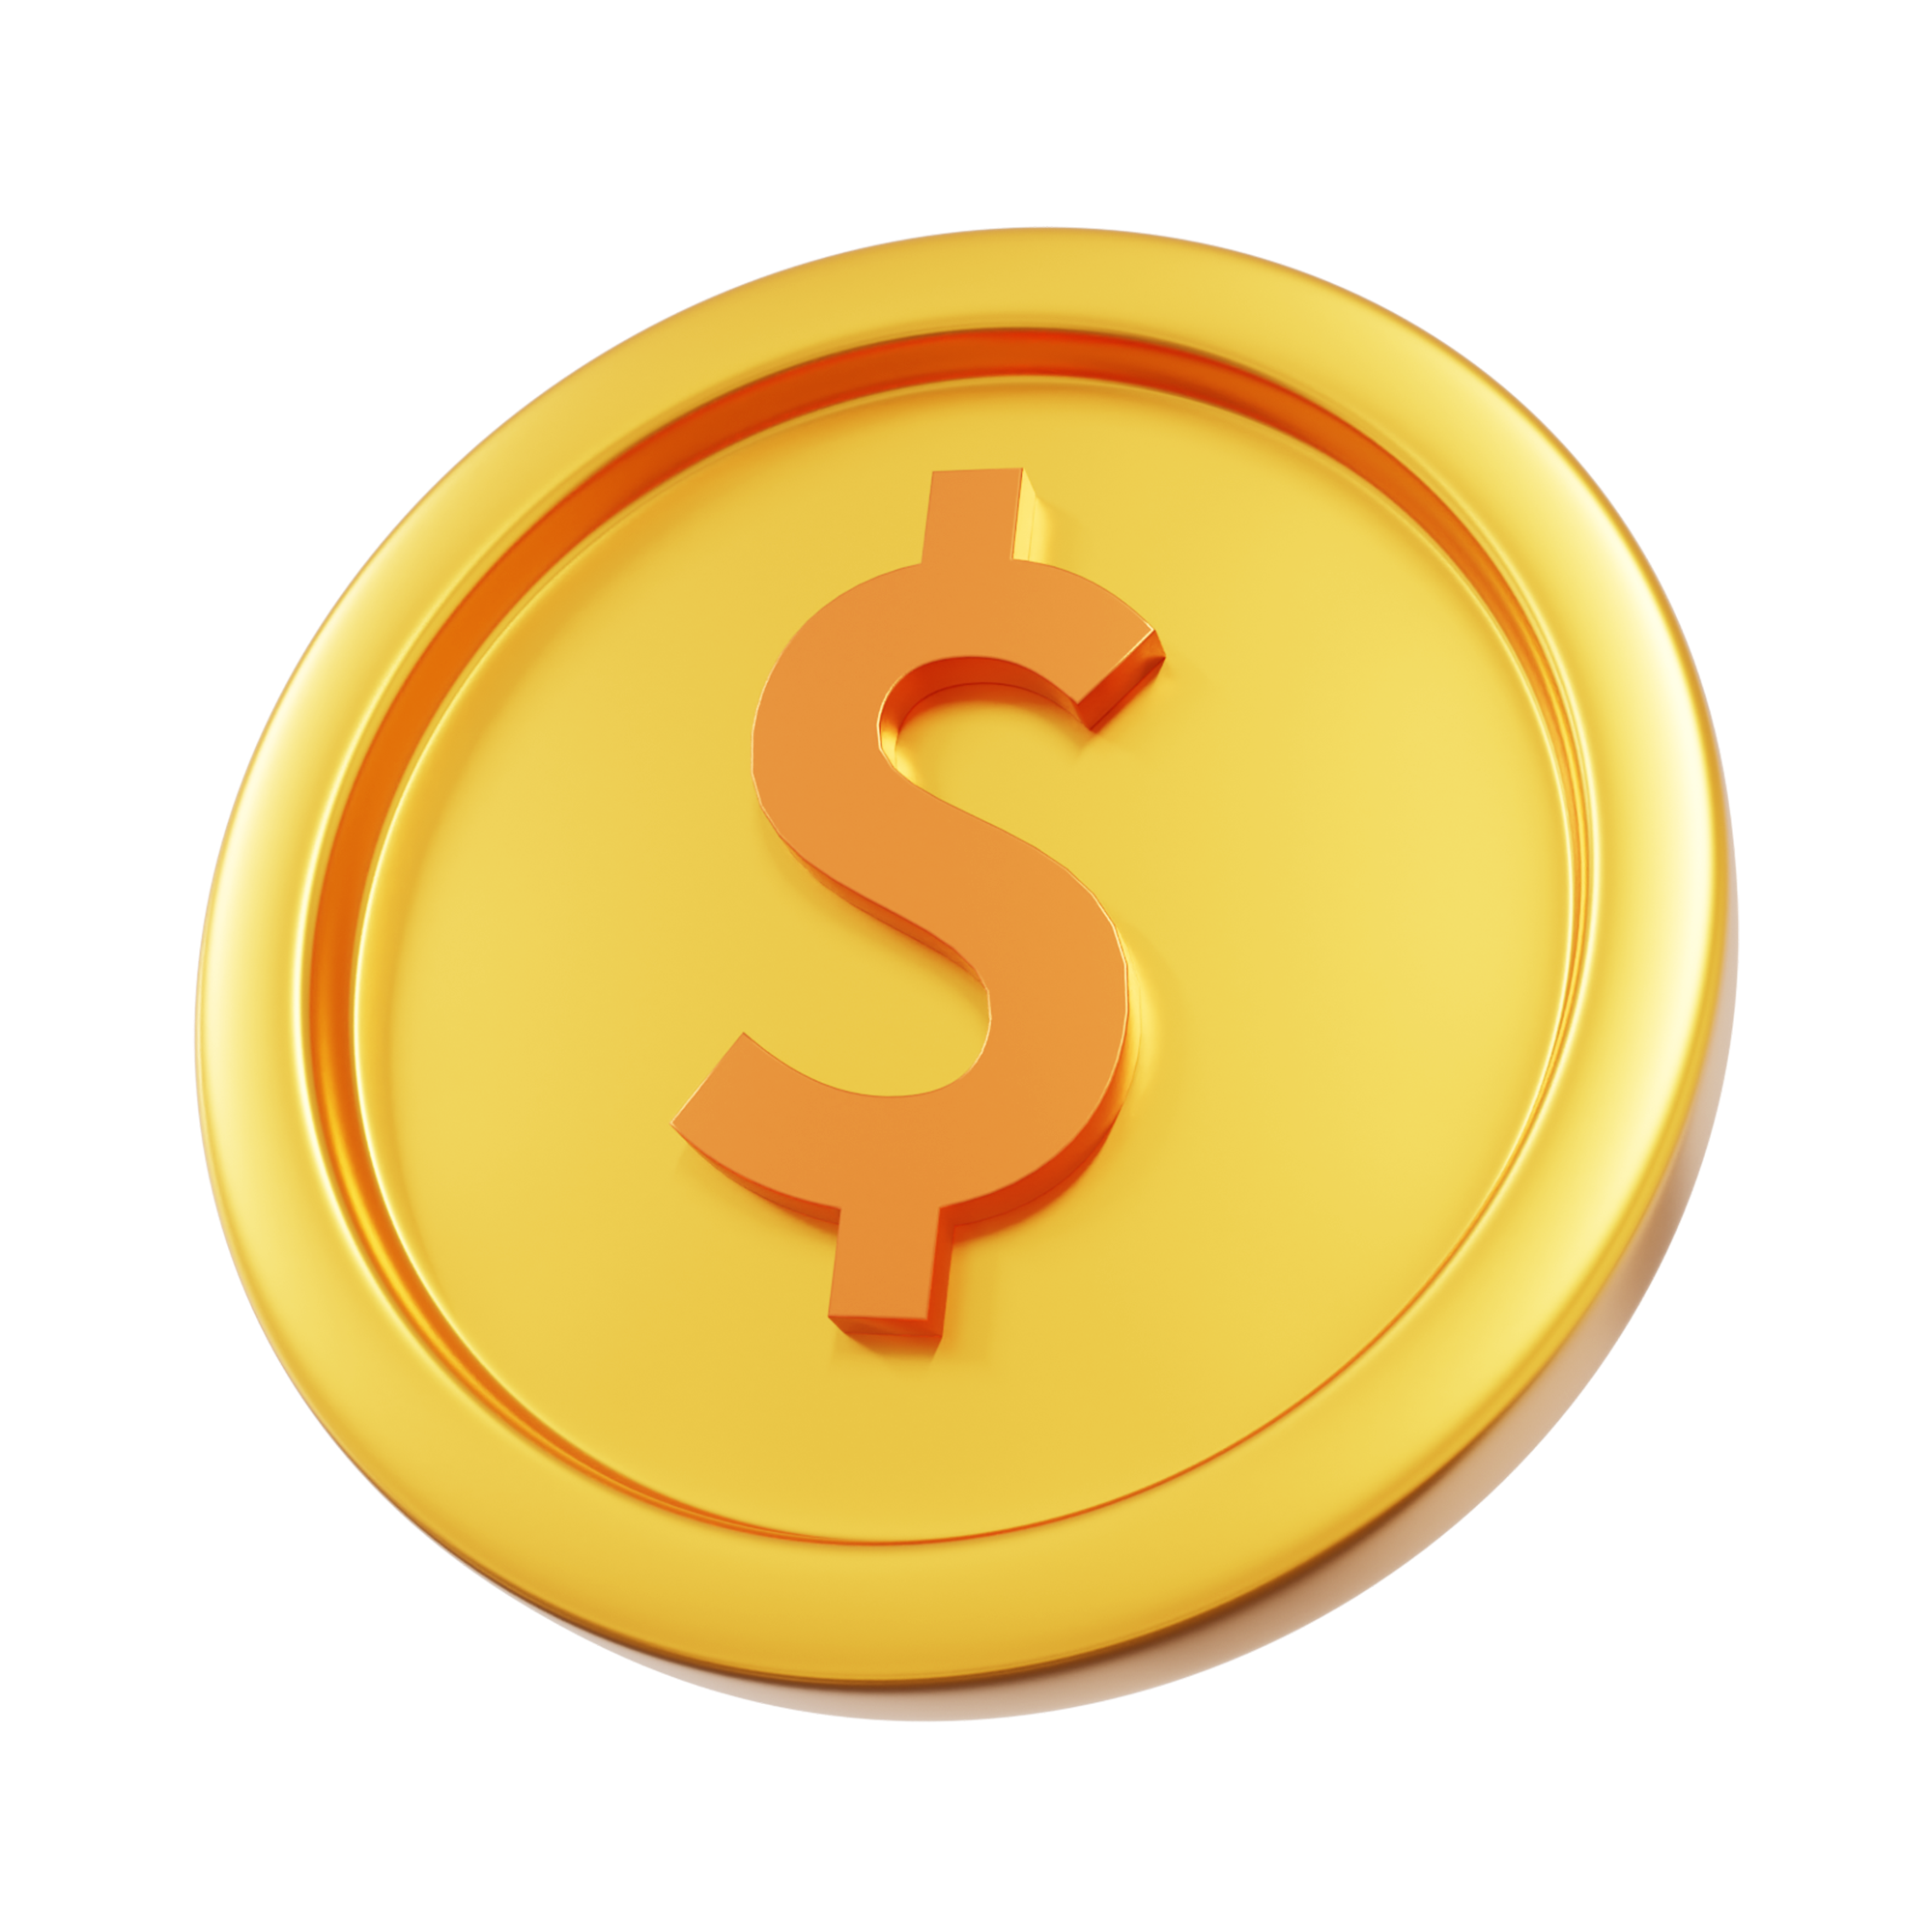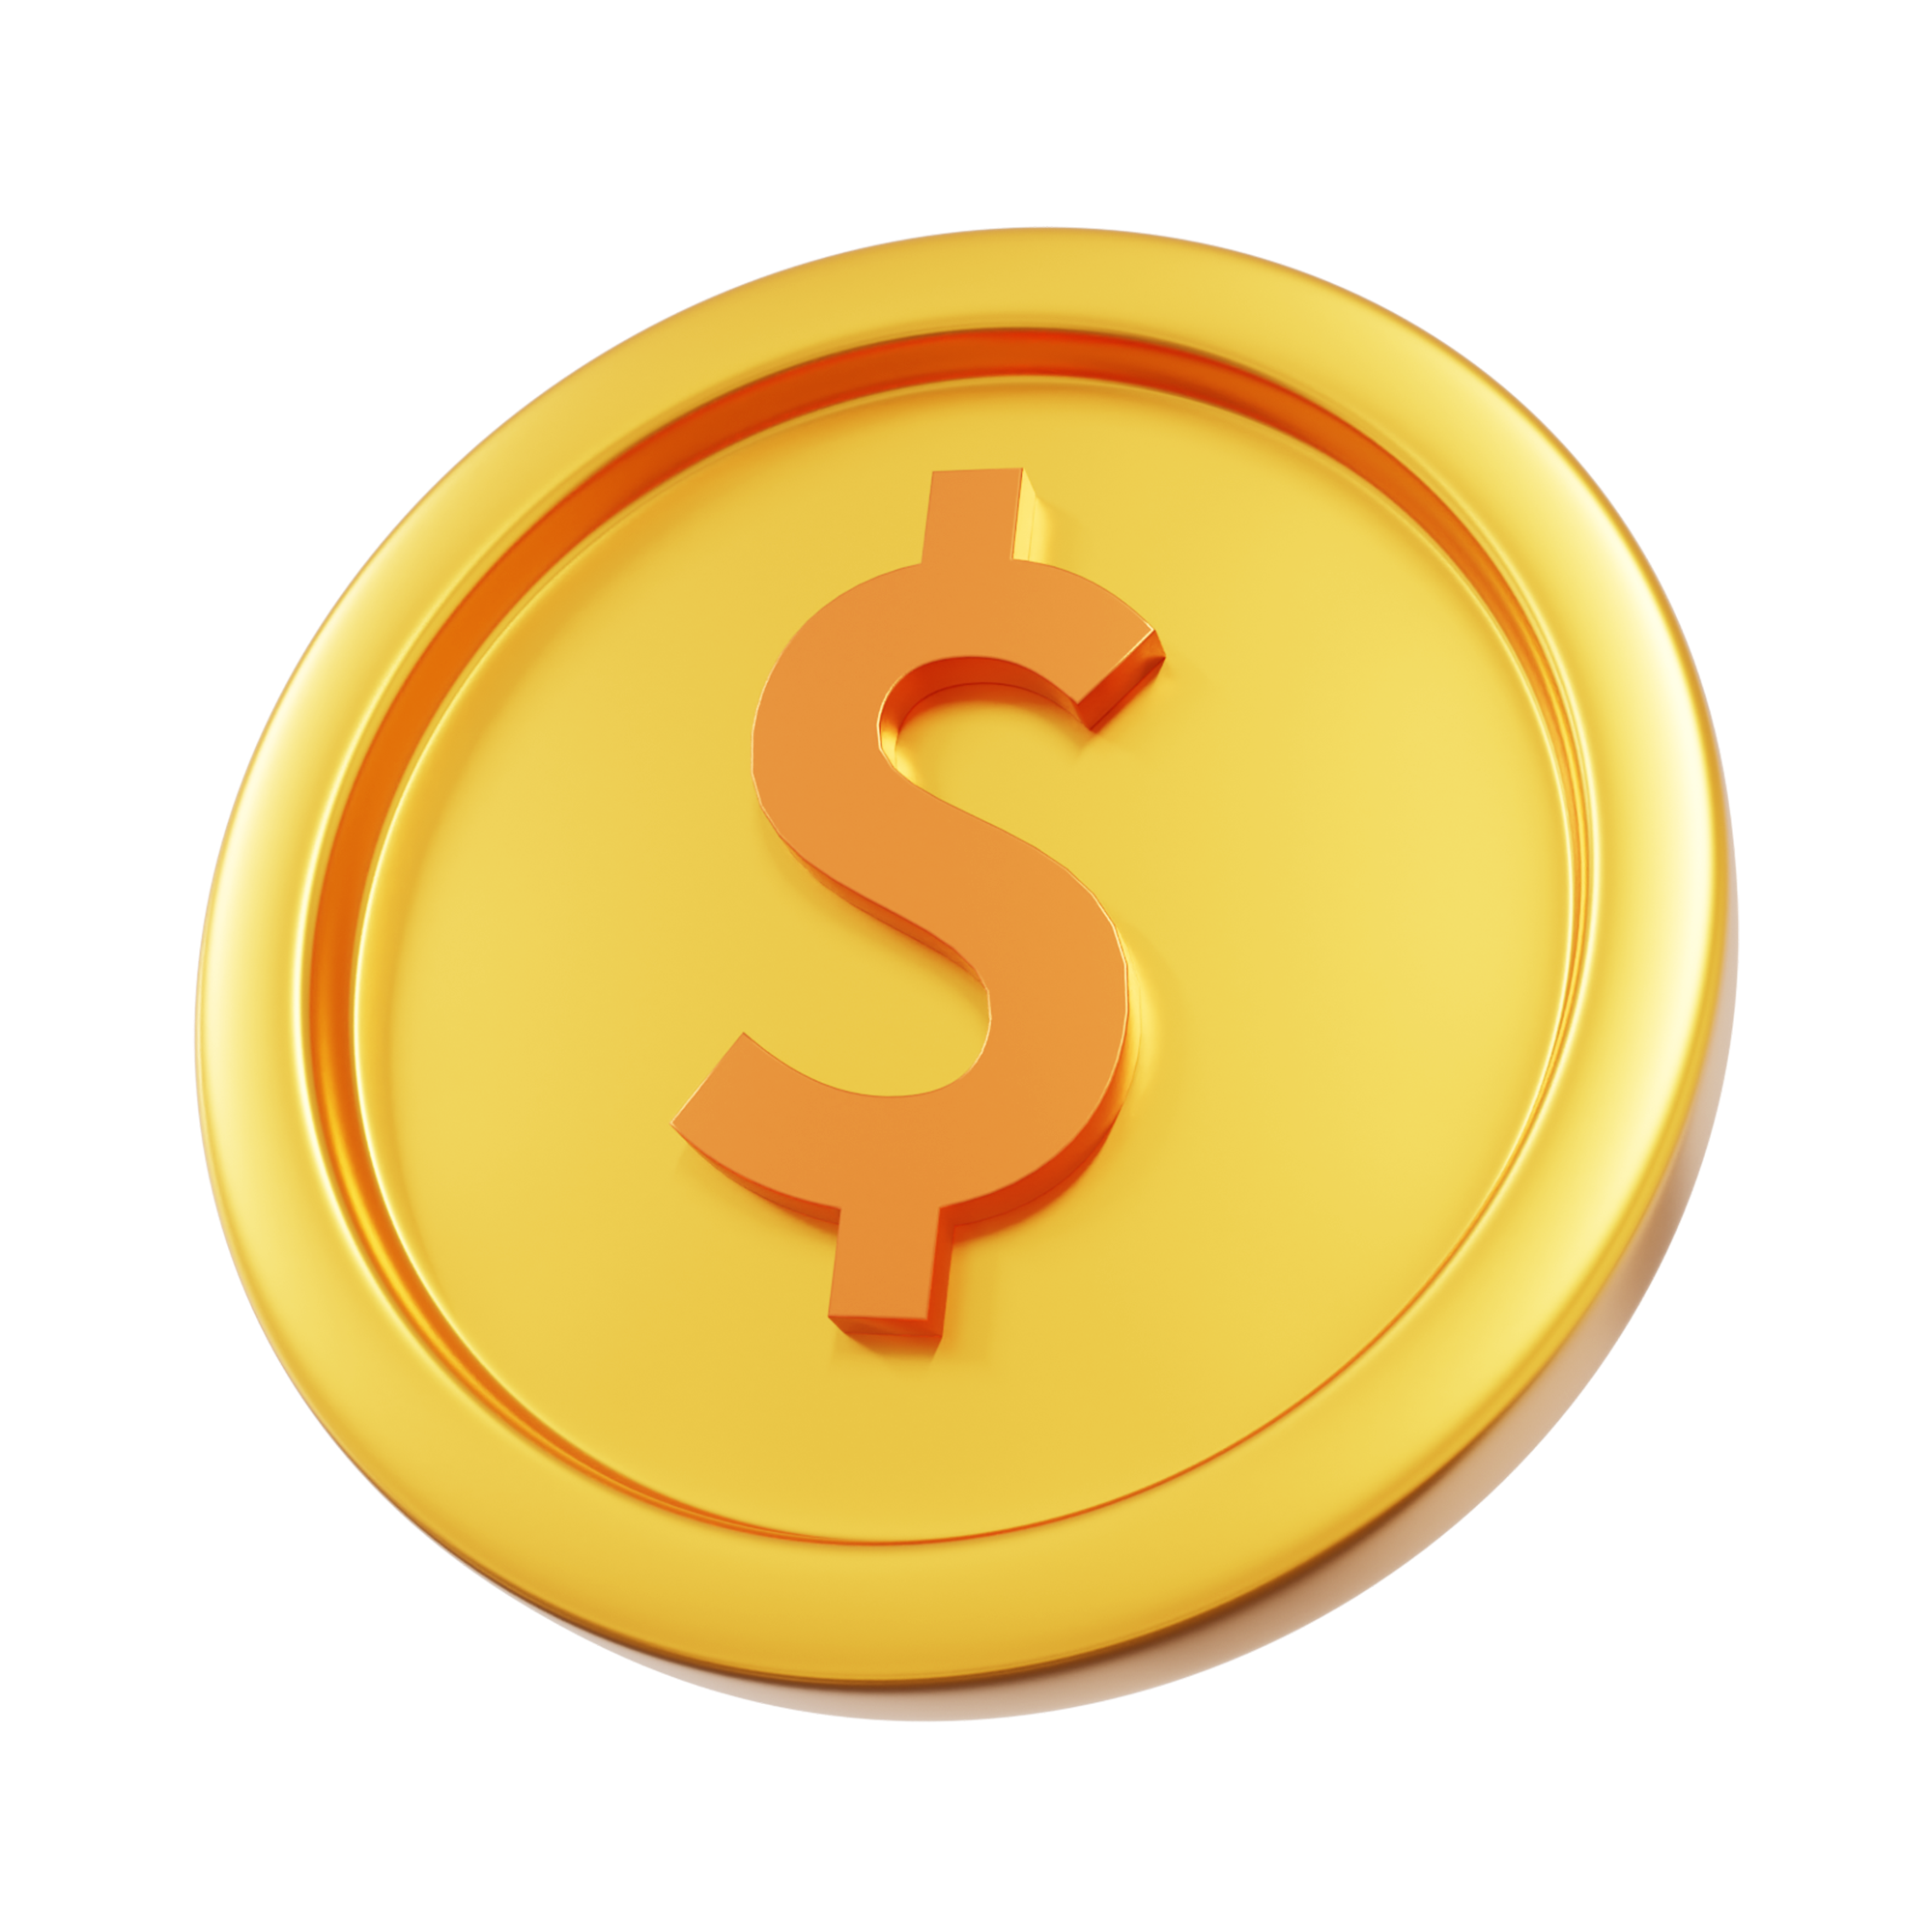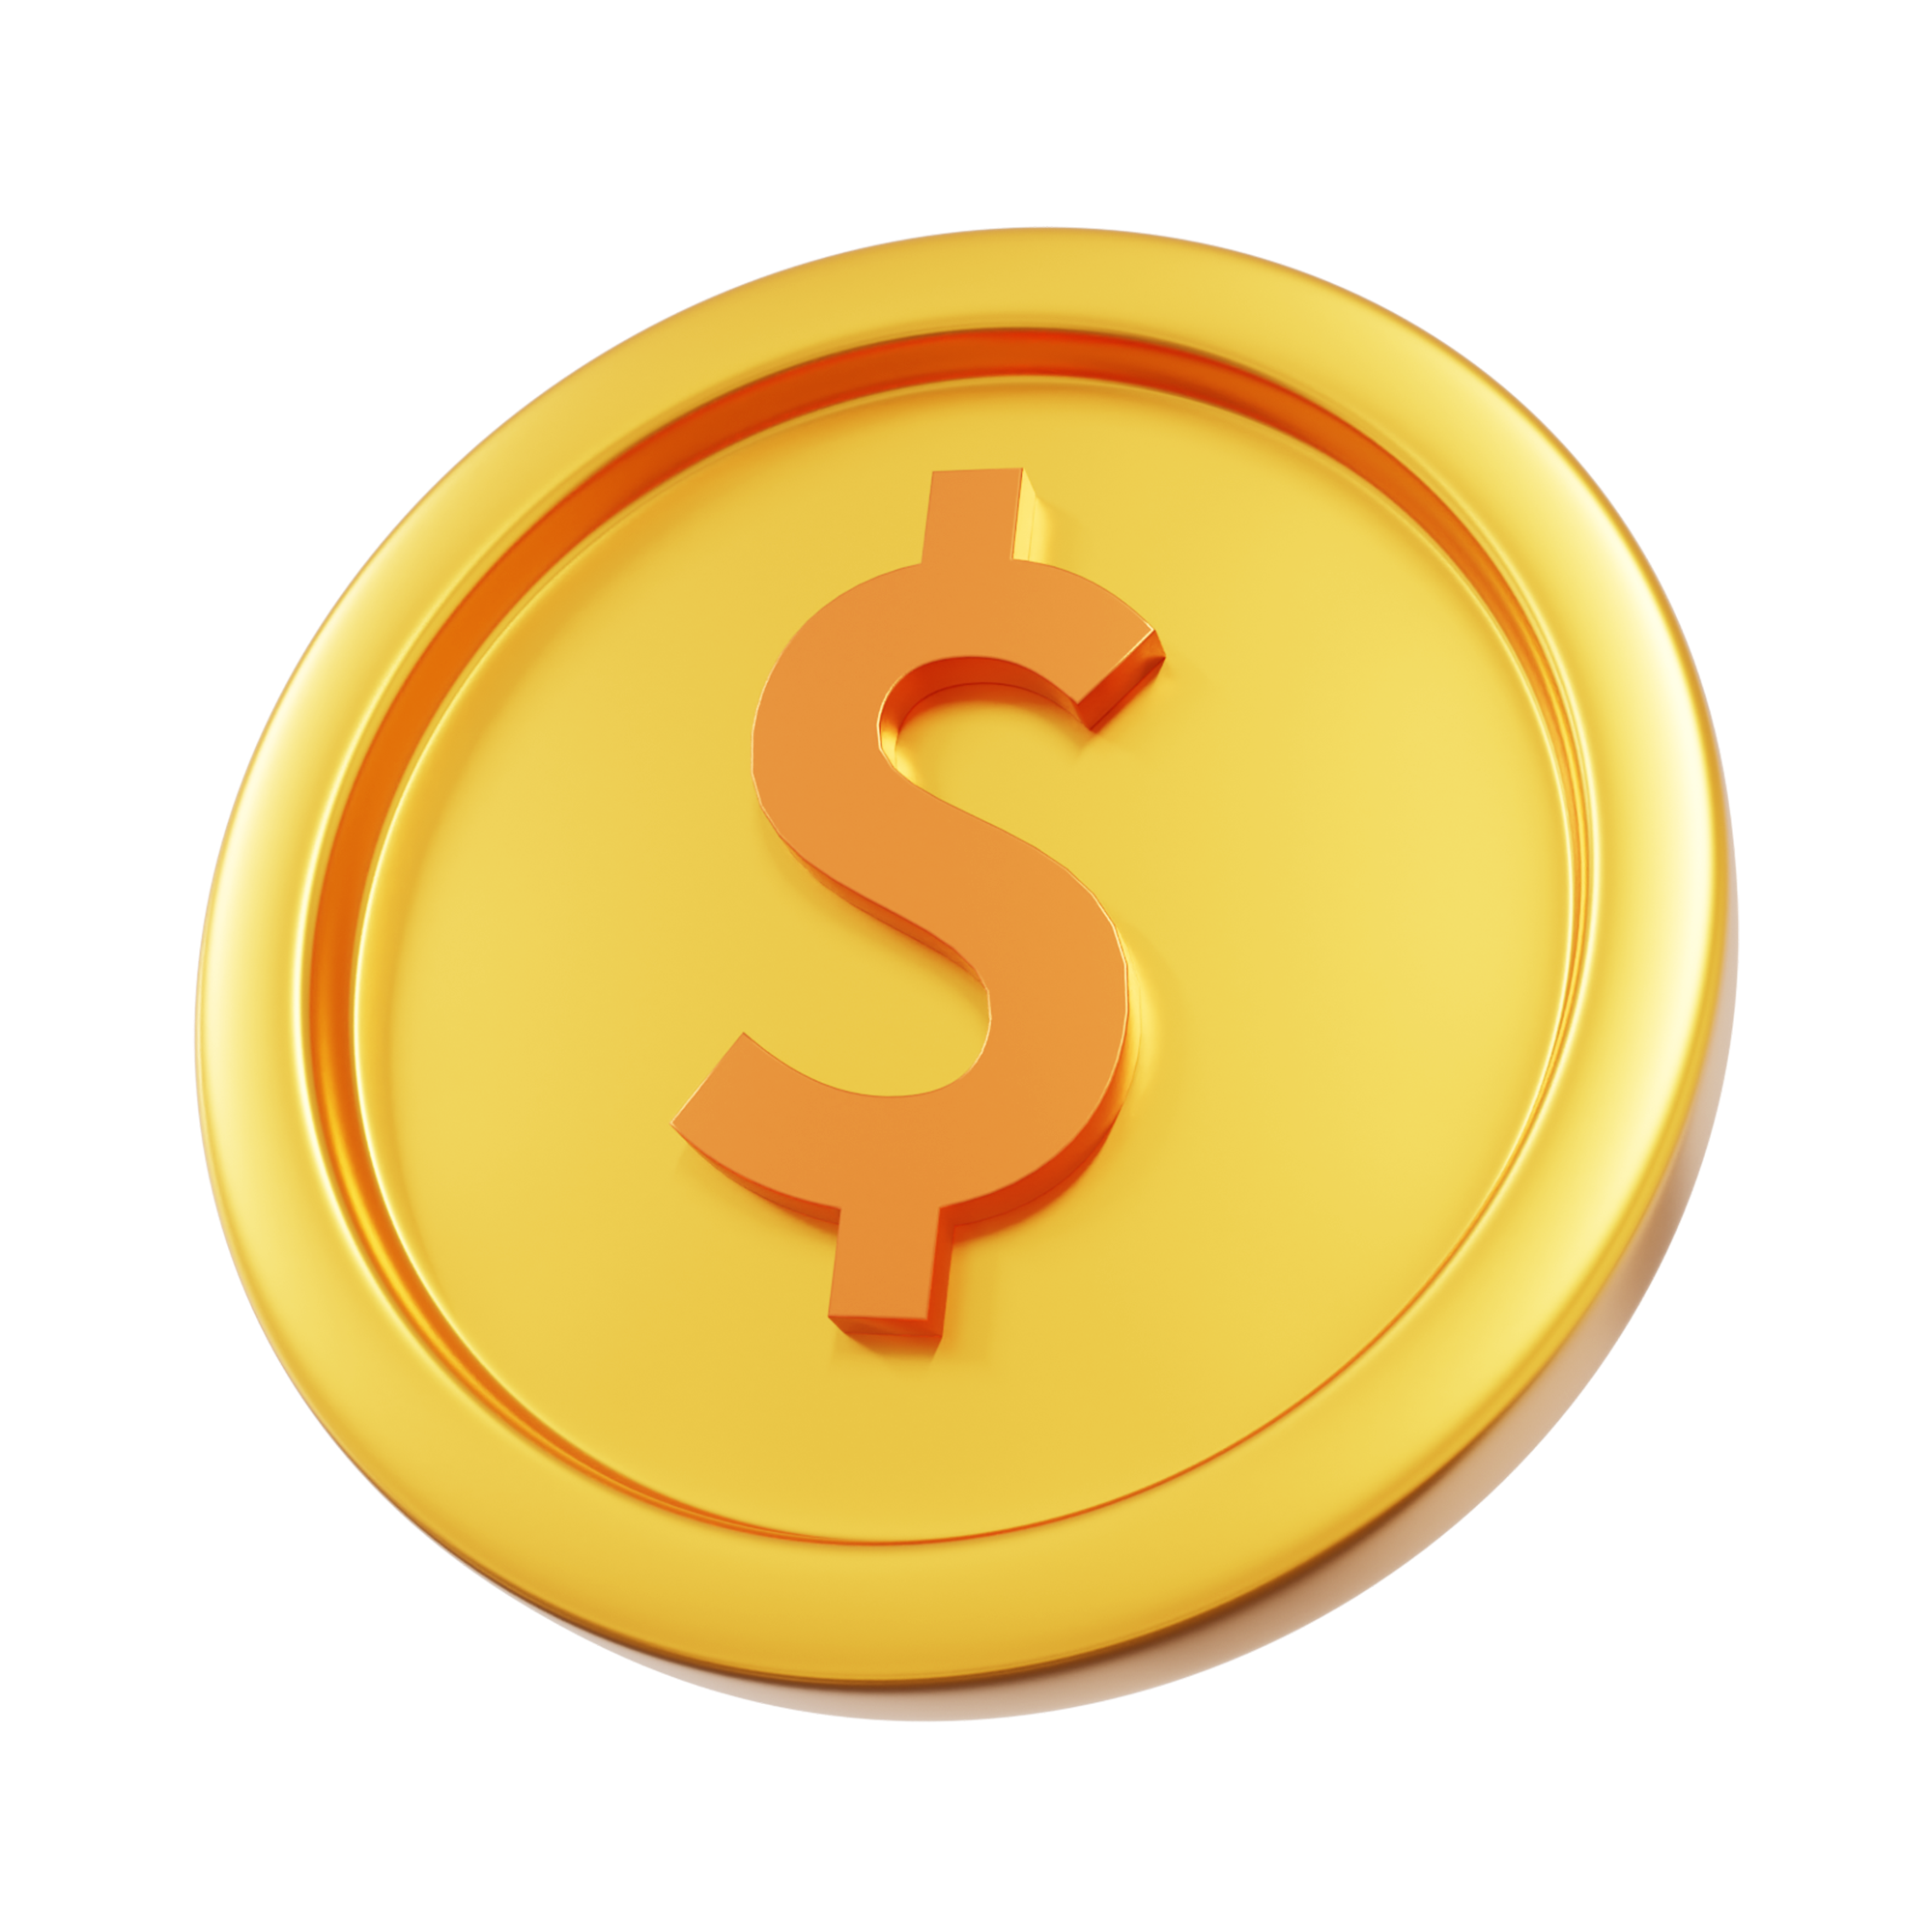 | <5 ¥CNY | 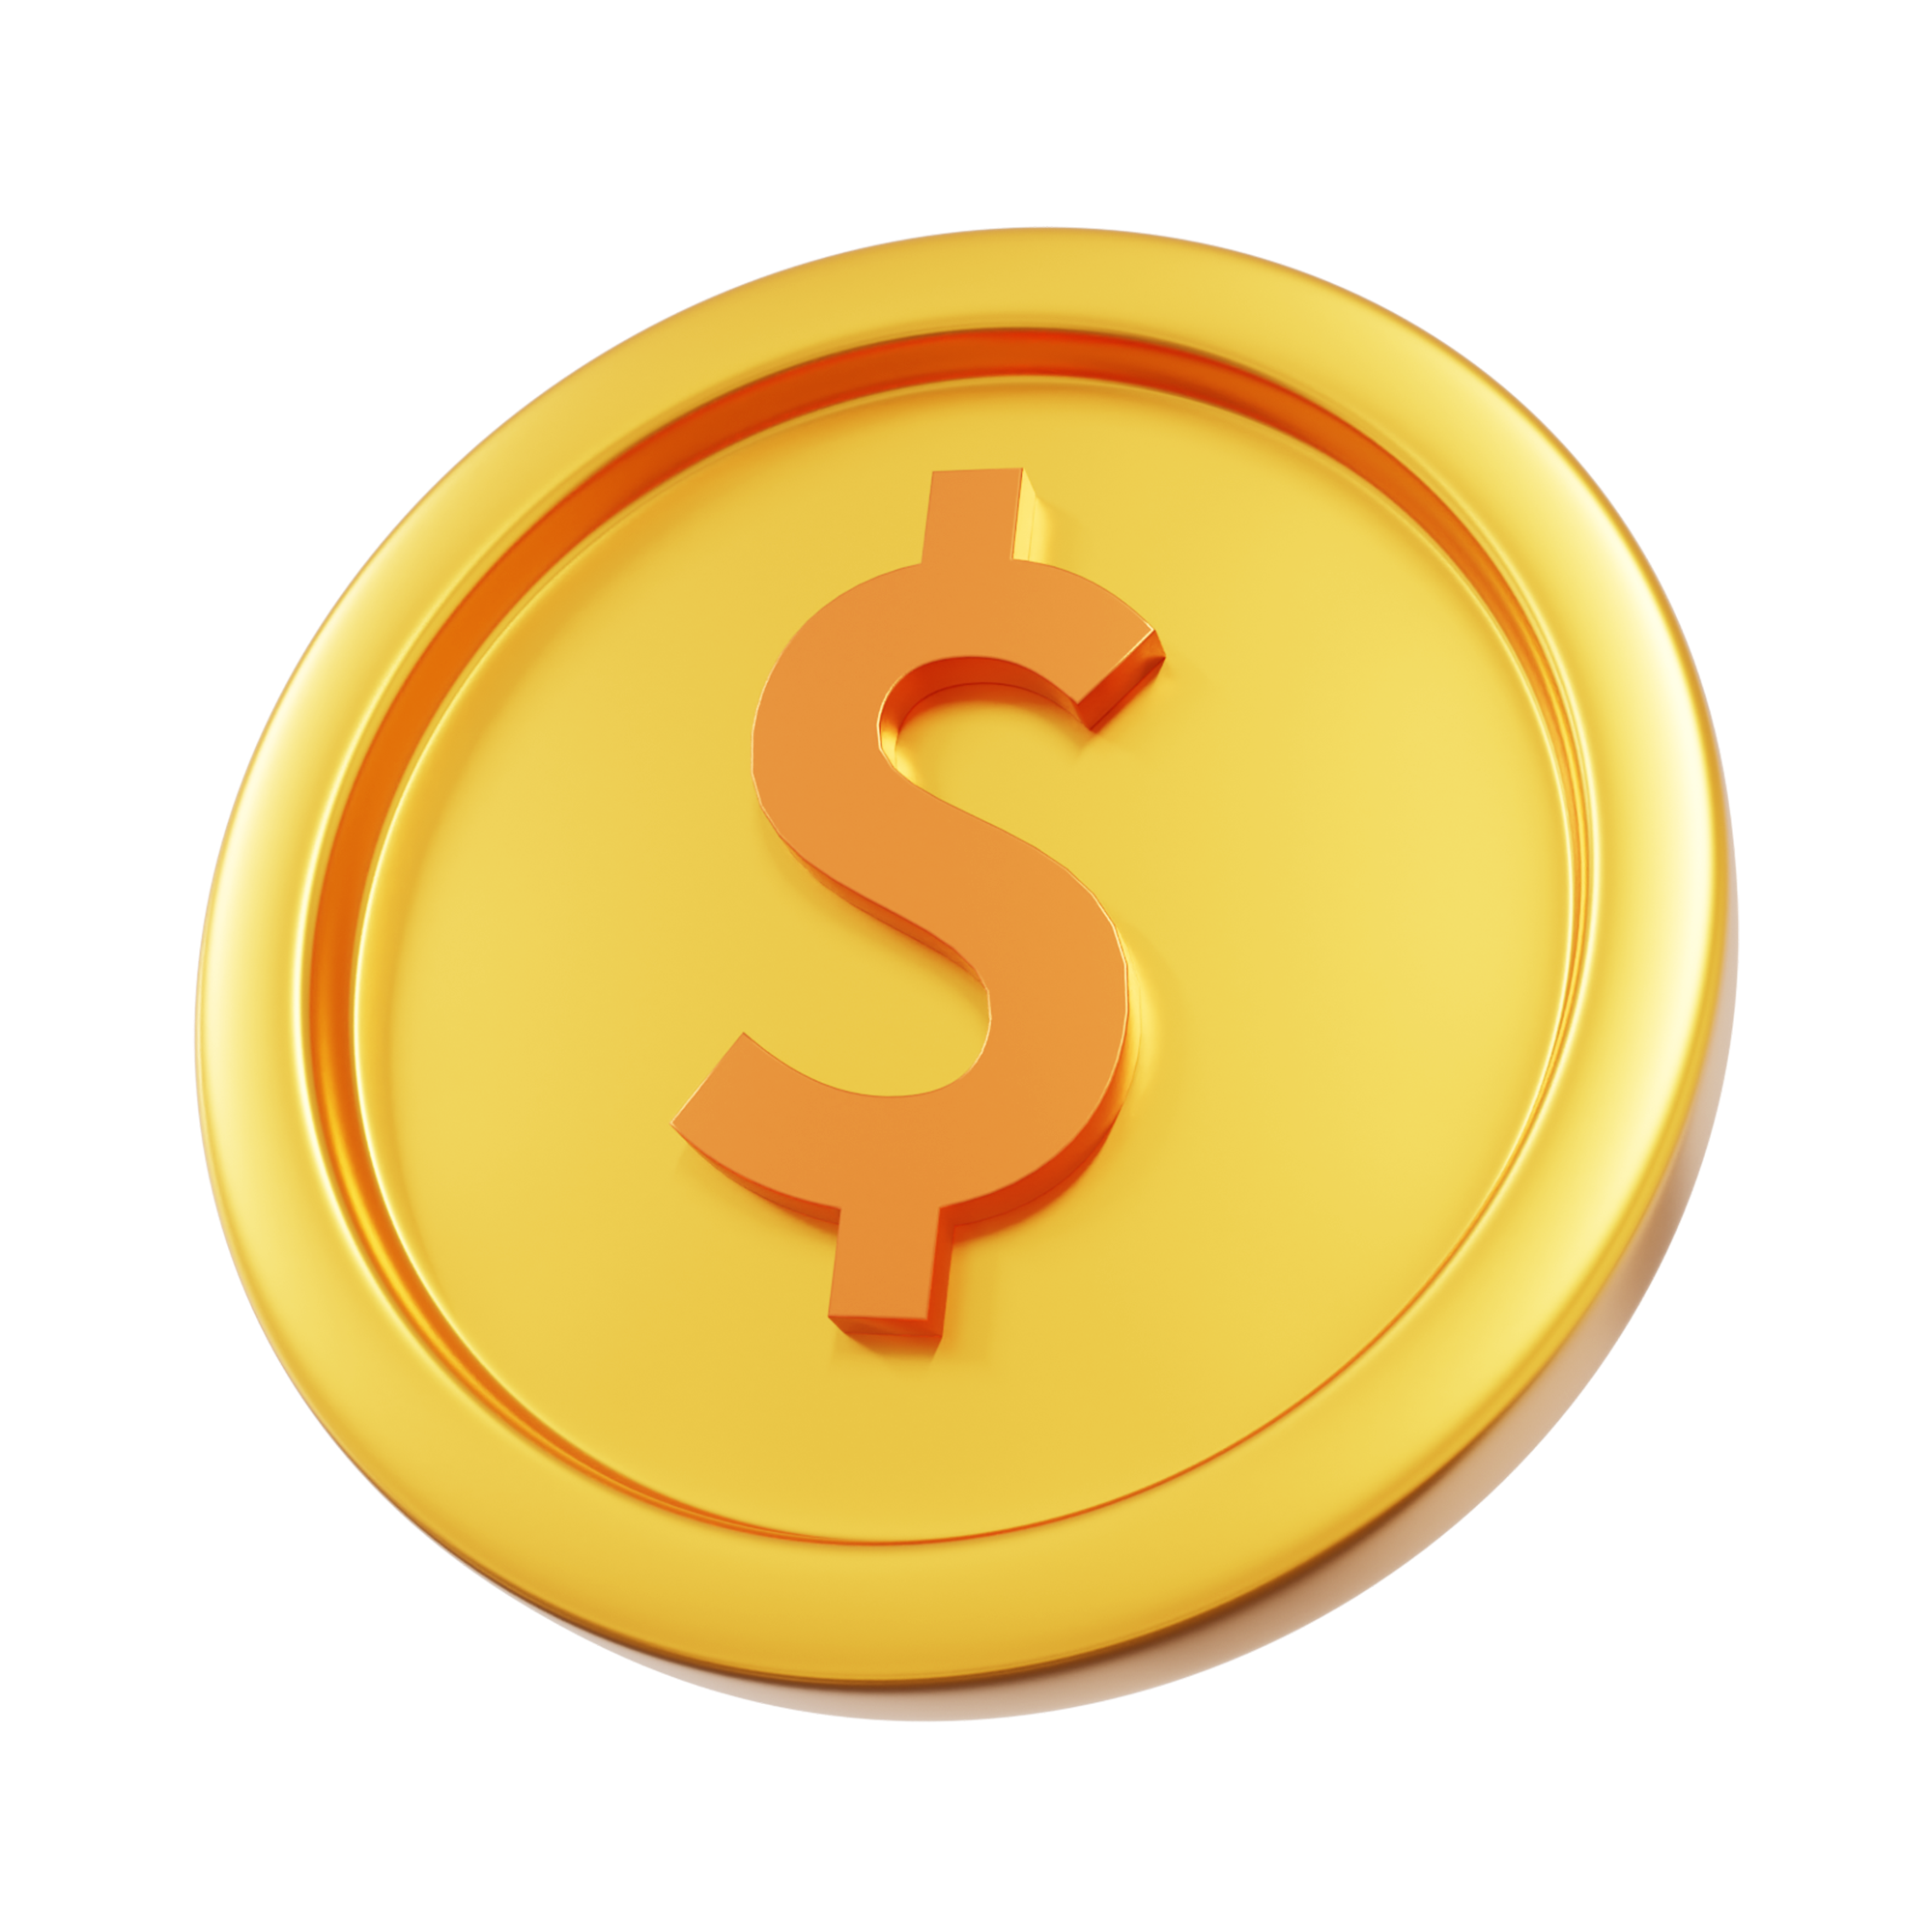 |
| Package Size | Small | 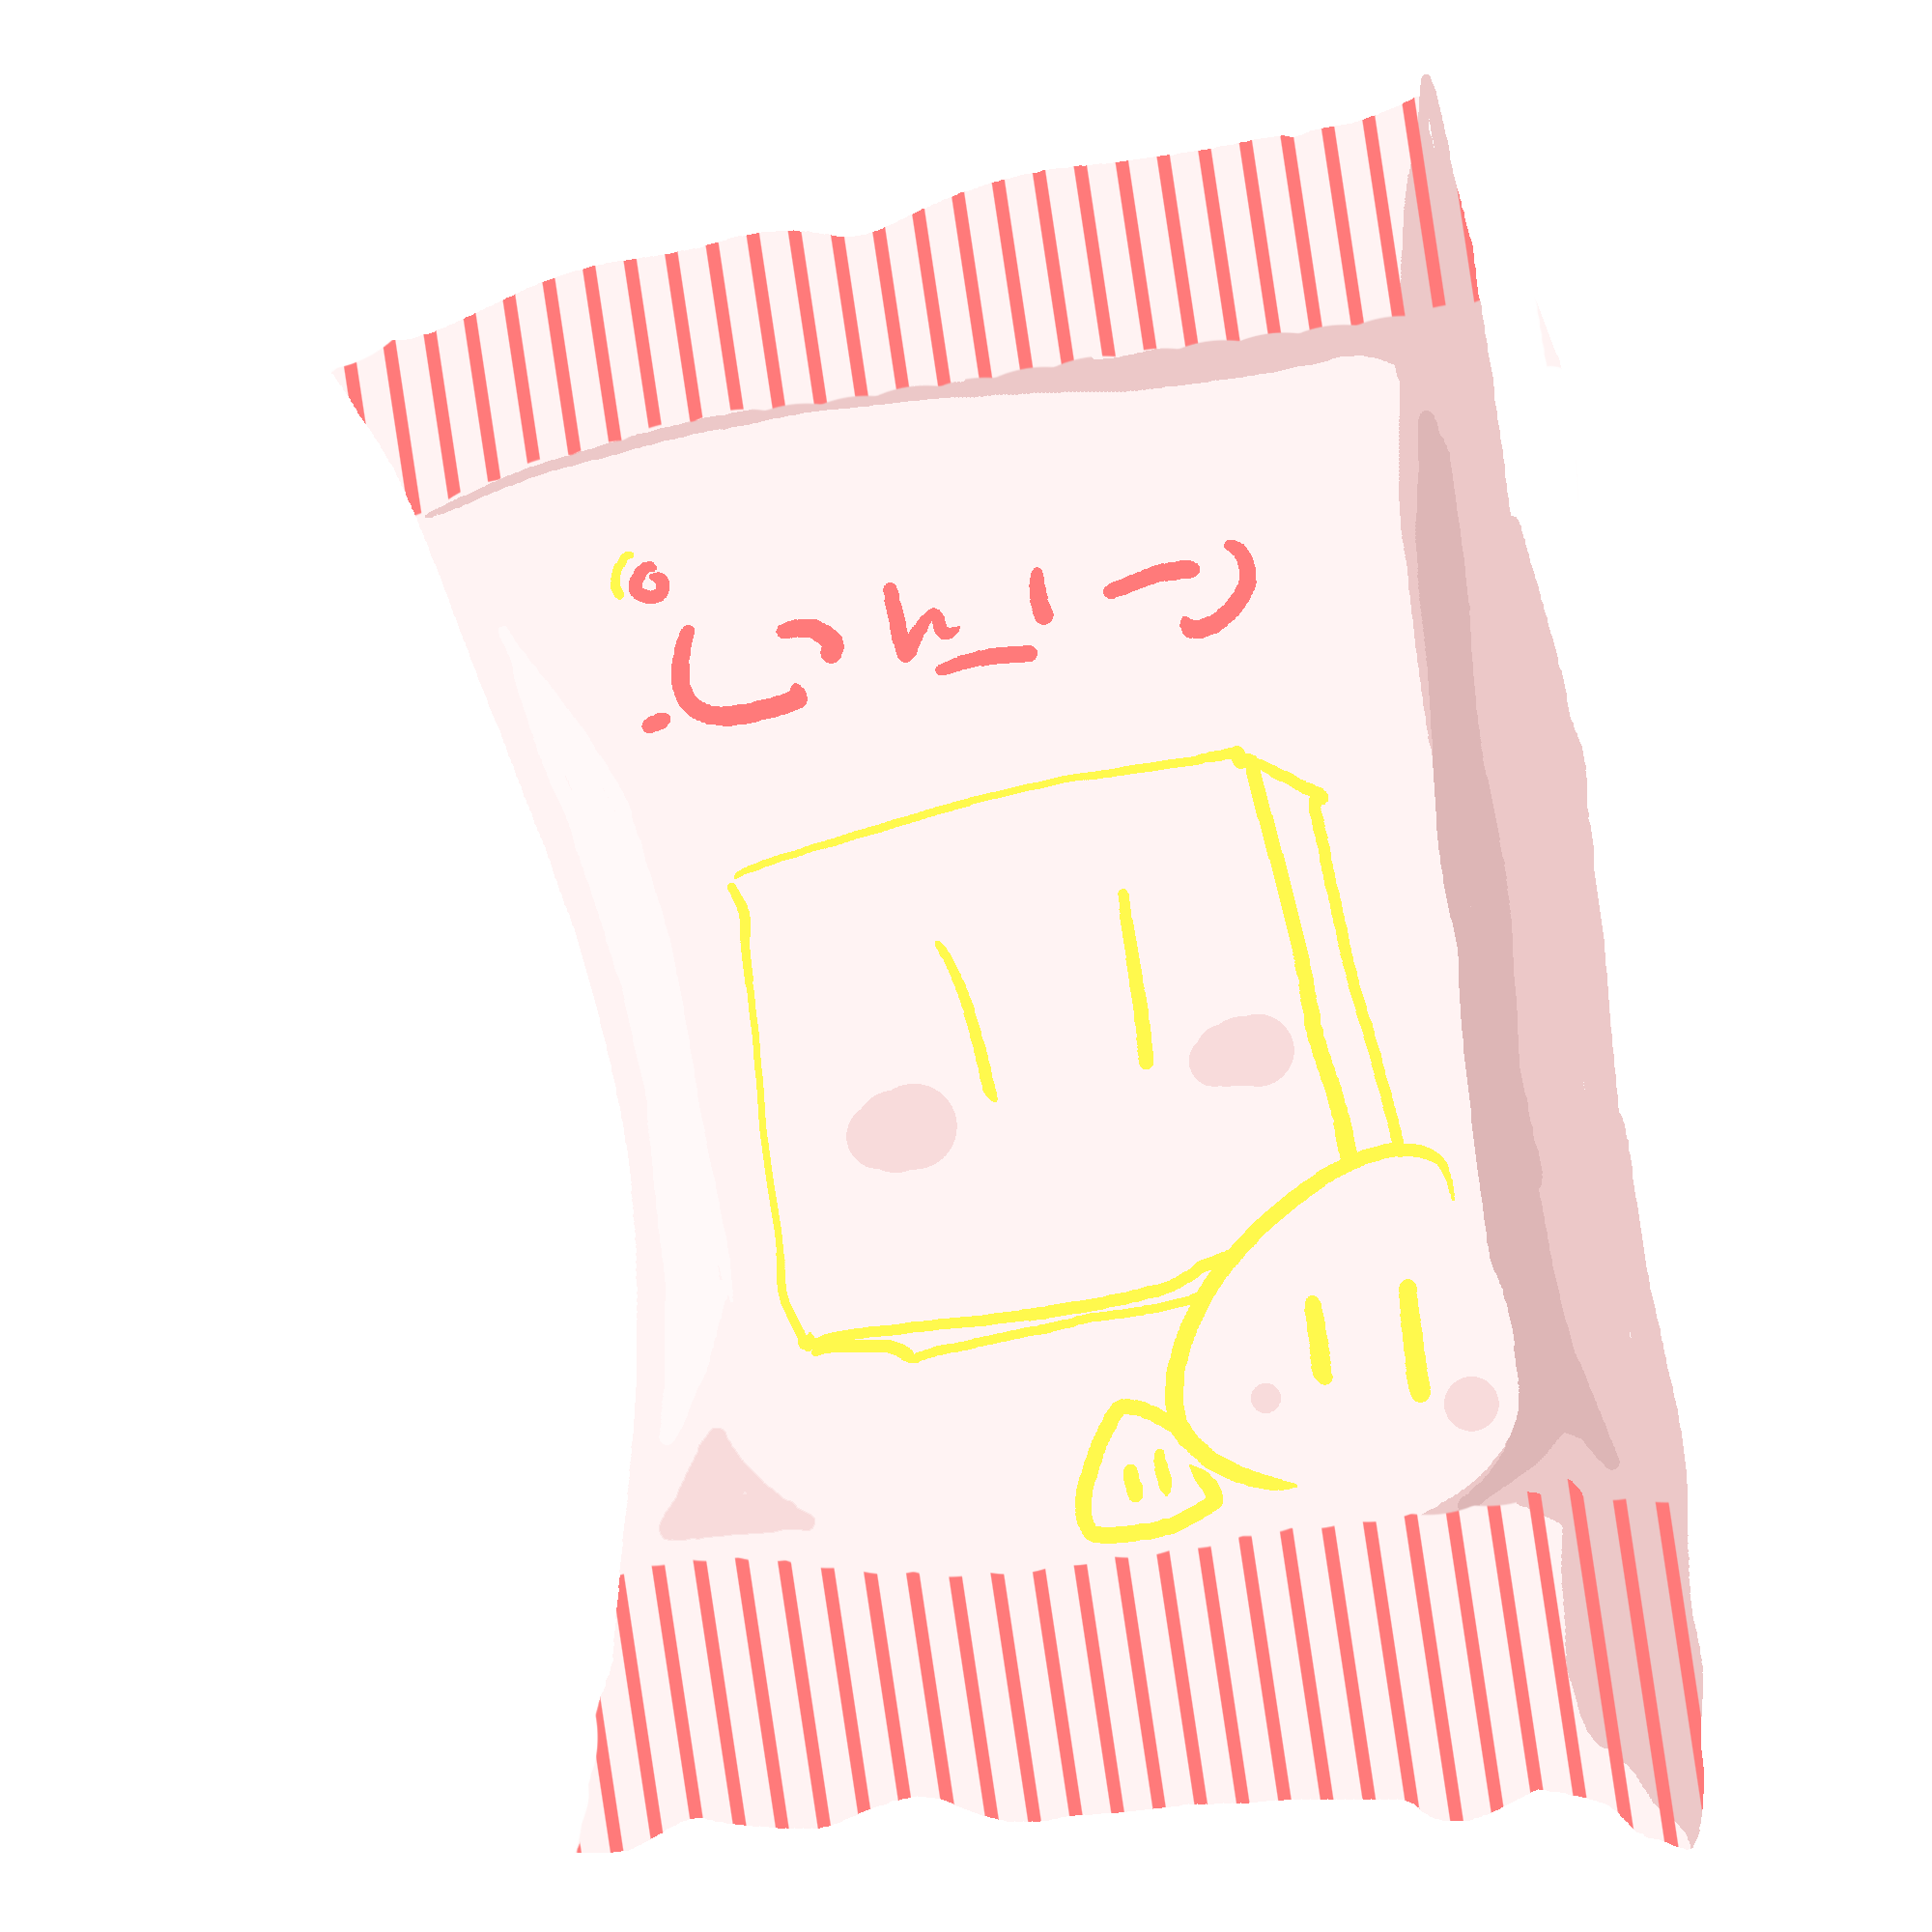 | Medium | 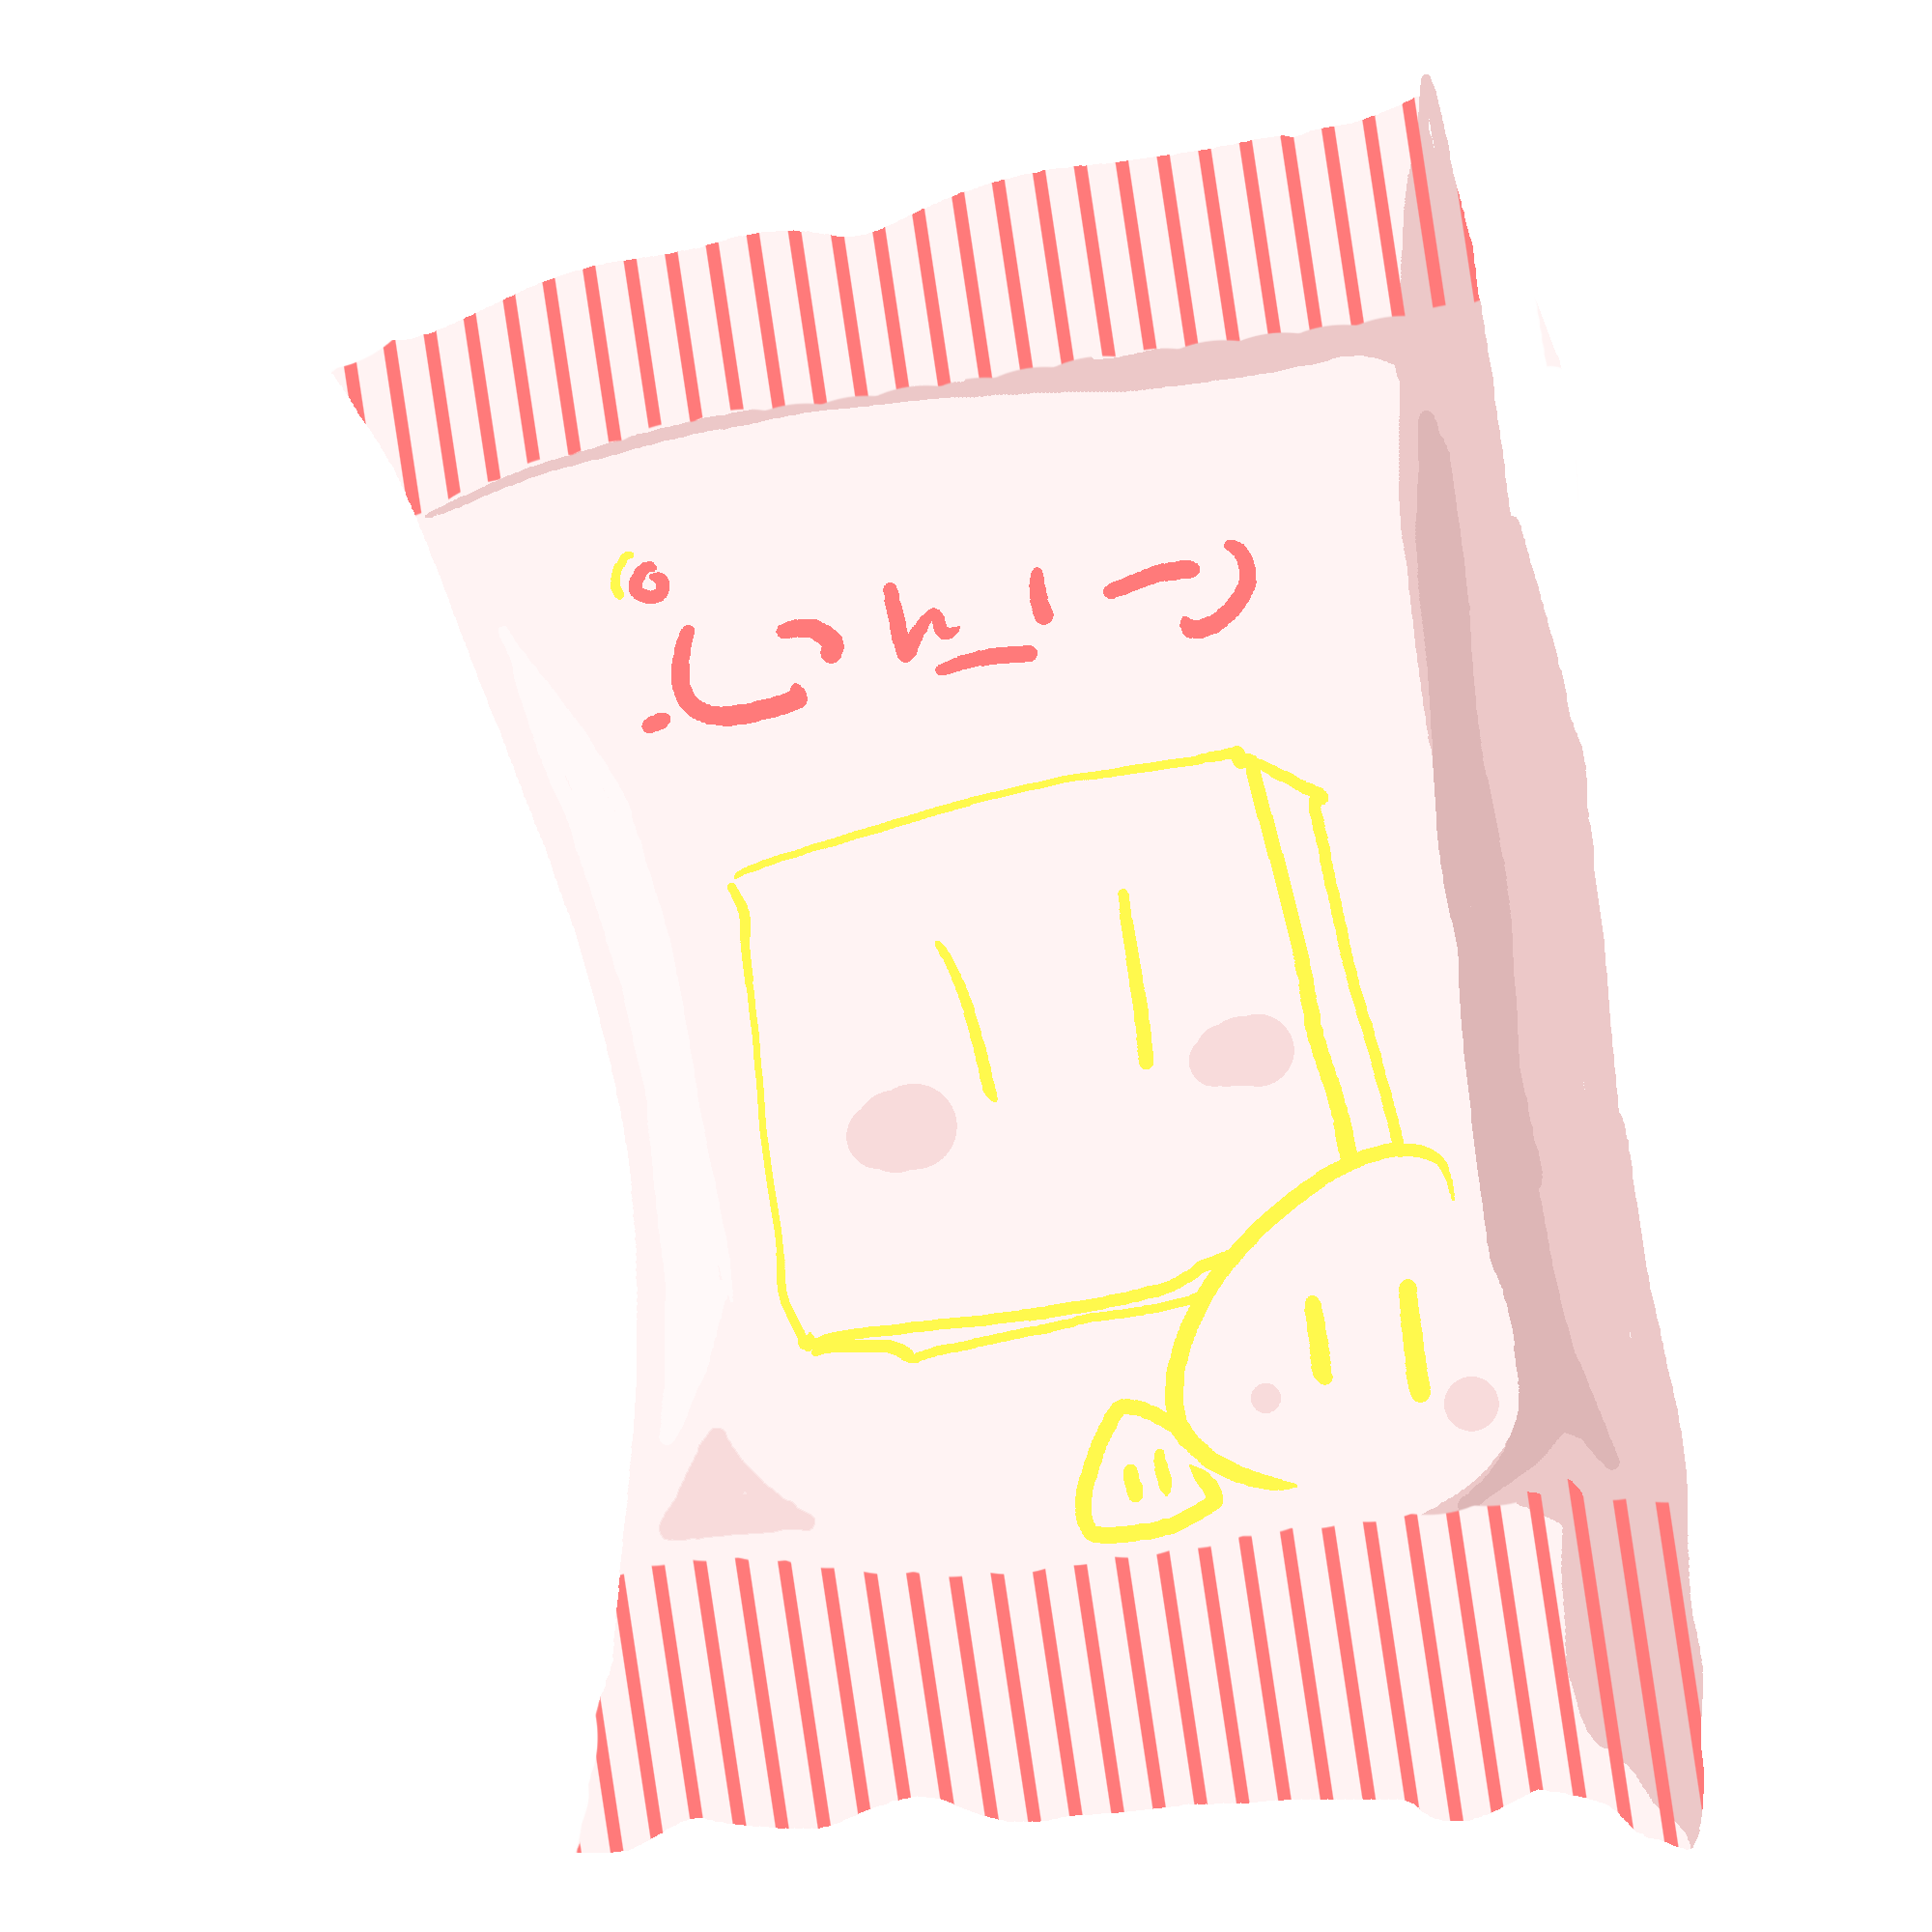 |
| Social Influence | Family Consumption Habits | 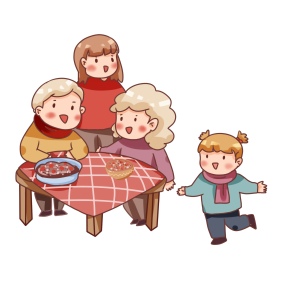 | Peer Recommendations | 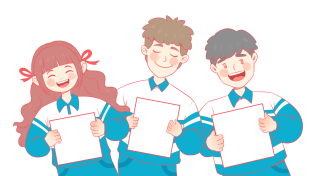 |
| Which option would you be more willing to choose | Snack A □ | | Snack B □ | |
| Considering your daily diet, would you consume this snack in real life?  Yes□ No□ | | | | |

Choice Set 4/8

| Snack Attributes | Snack A | | Snack B | |
| --- | --- | --- | --- | --- |
| Taste | Original Flavor | 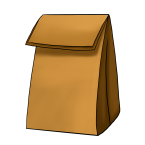 | Spicy  Flavor | 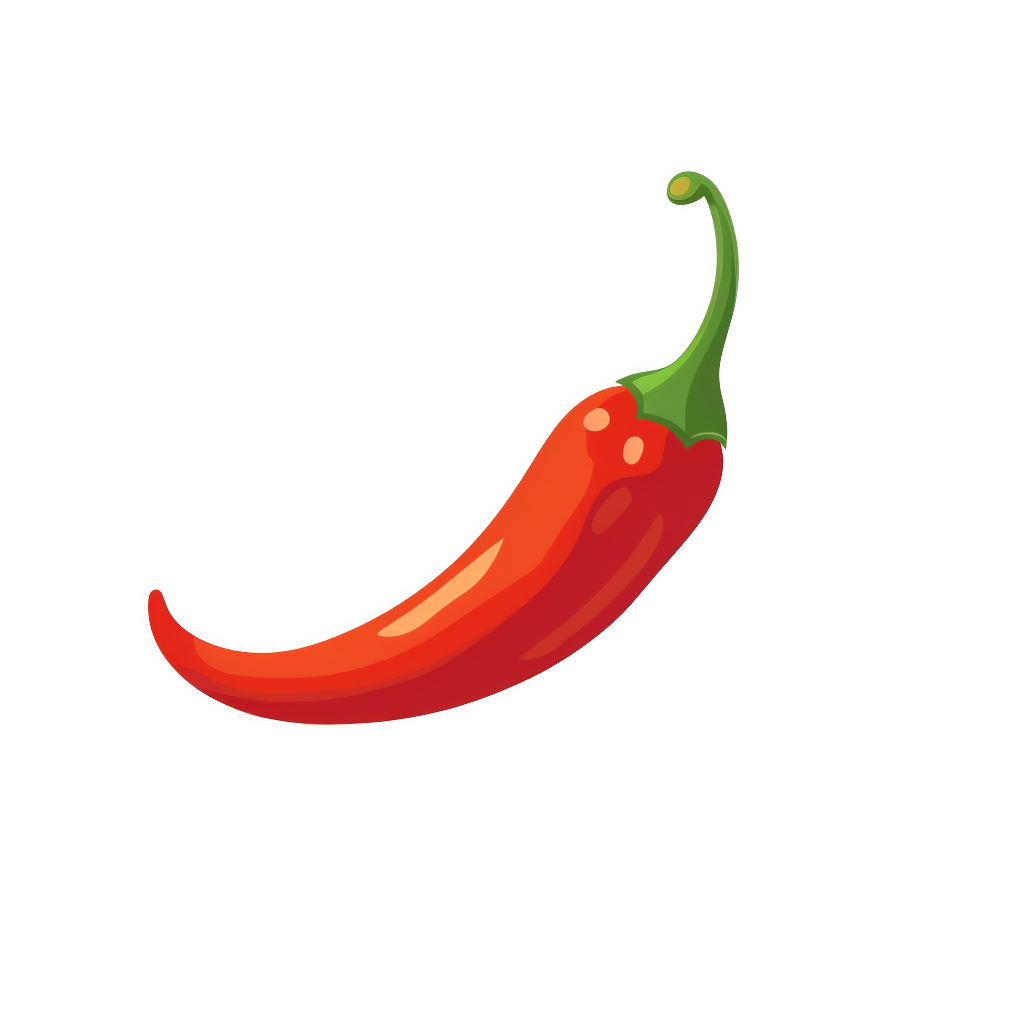 |
| Nutrient Claims | Rich Minerals / Vitamins | 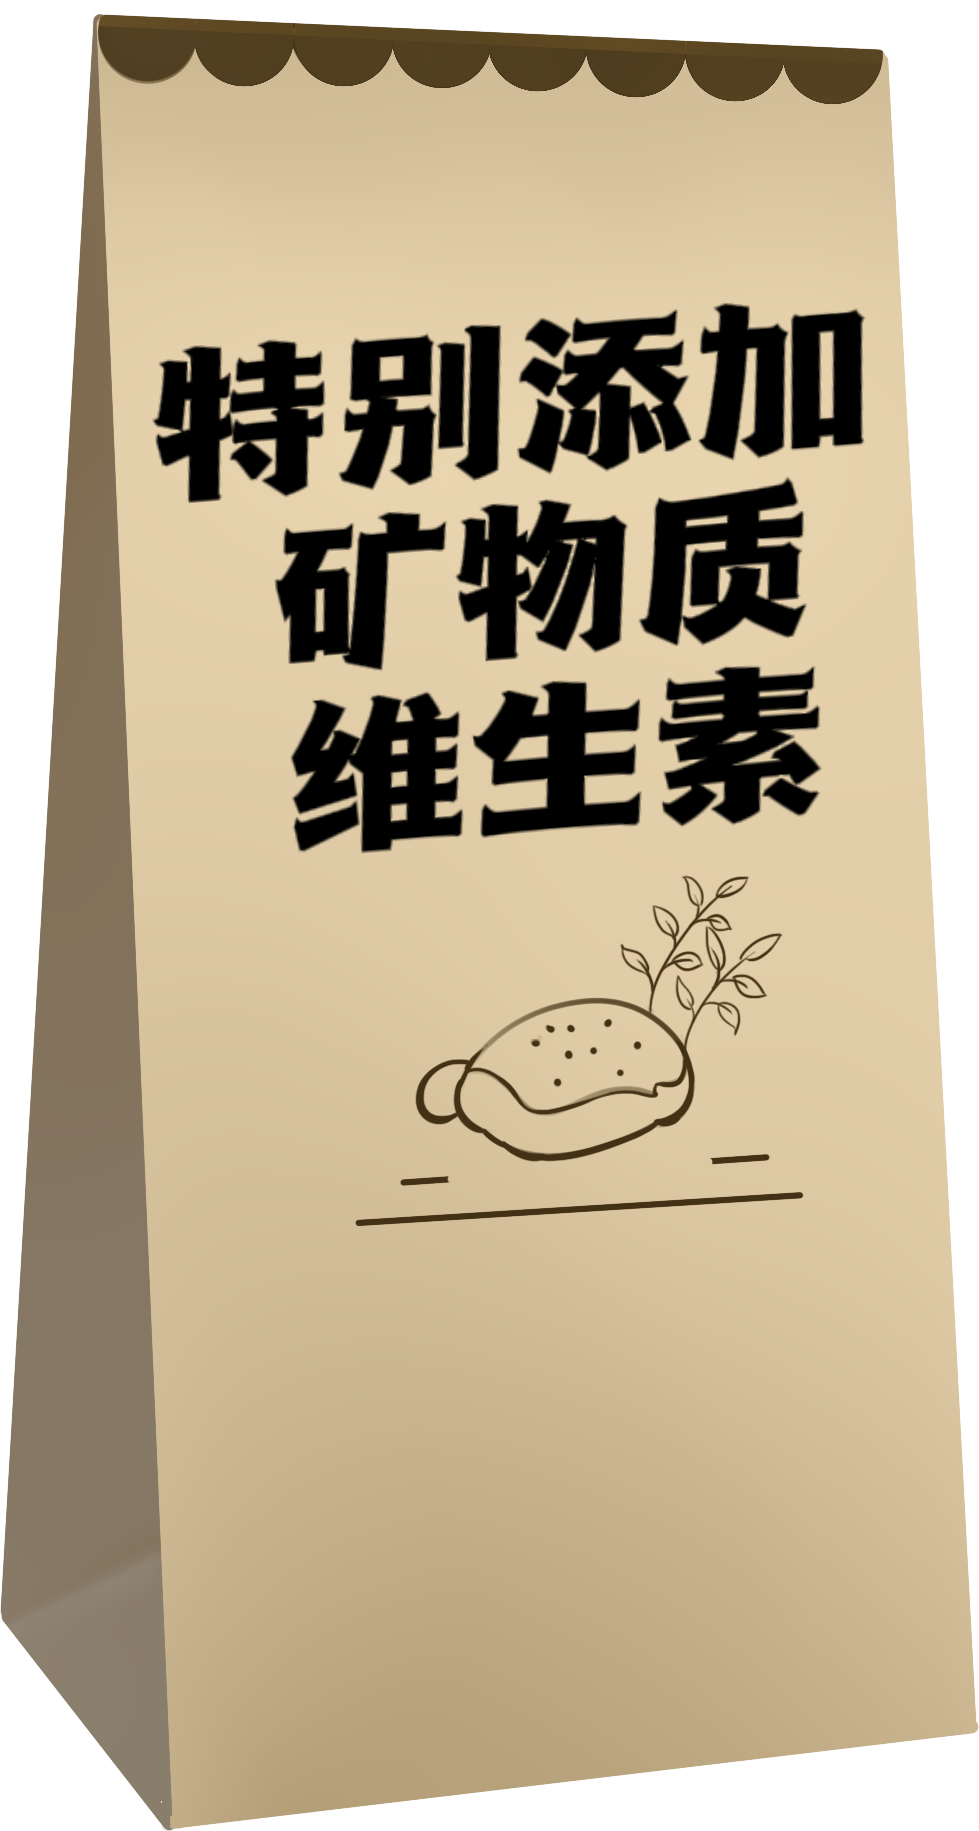 | High Dietary Fiber | 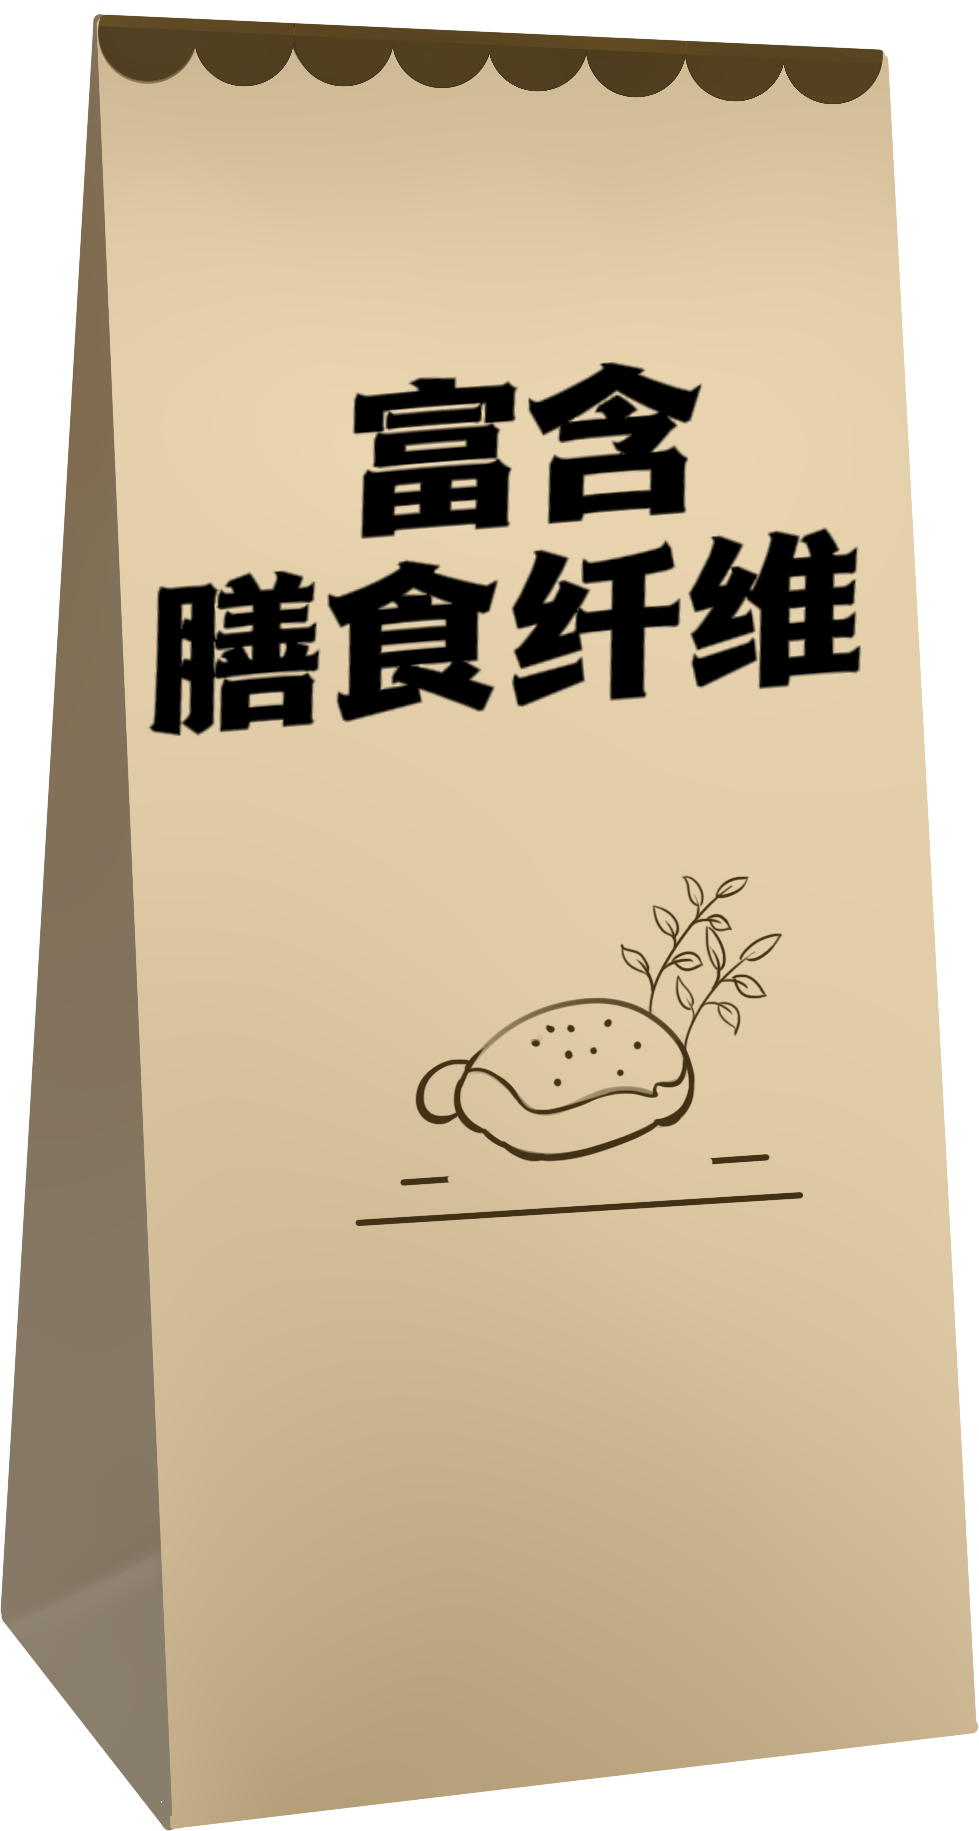 |
| Purchase Location | Supermarket/ Hypermarket | 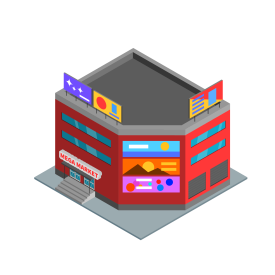 | Near School | 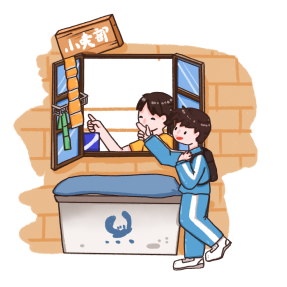 |
| Price | <5 ¥CNY | 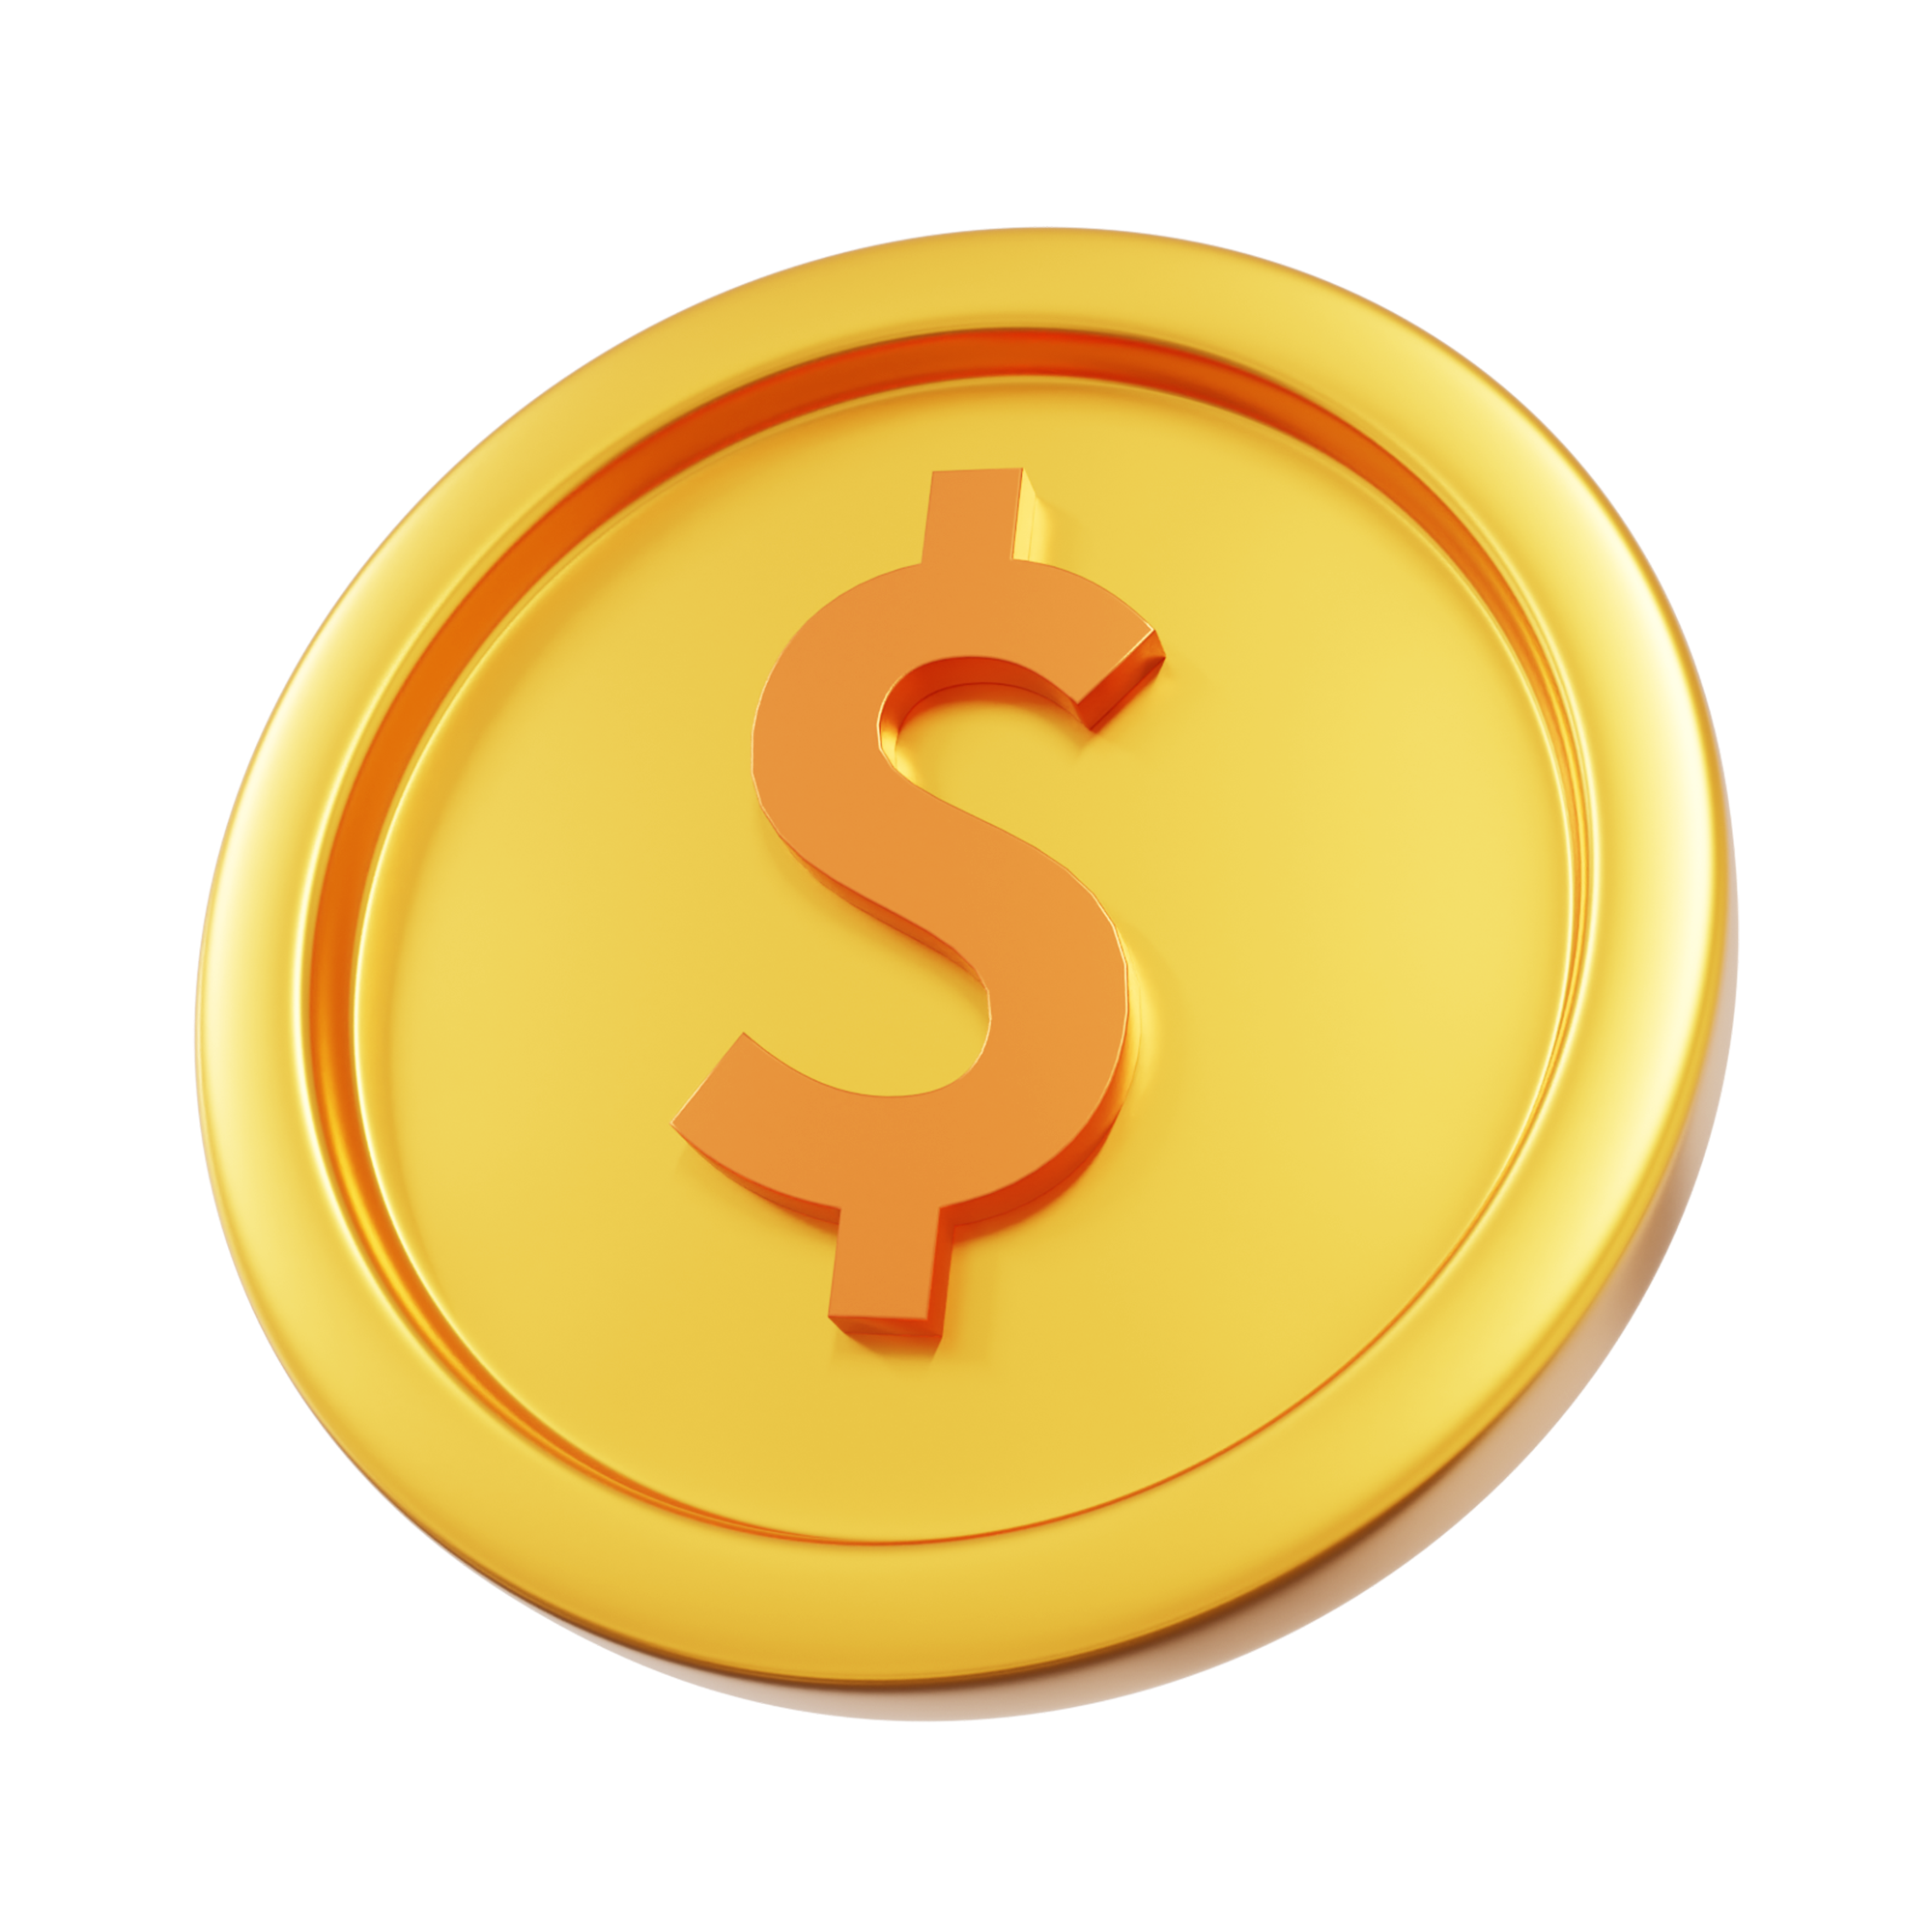 | ≥10 ¥CNY | 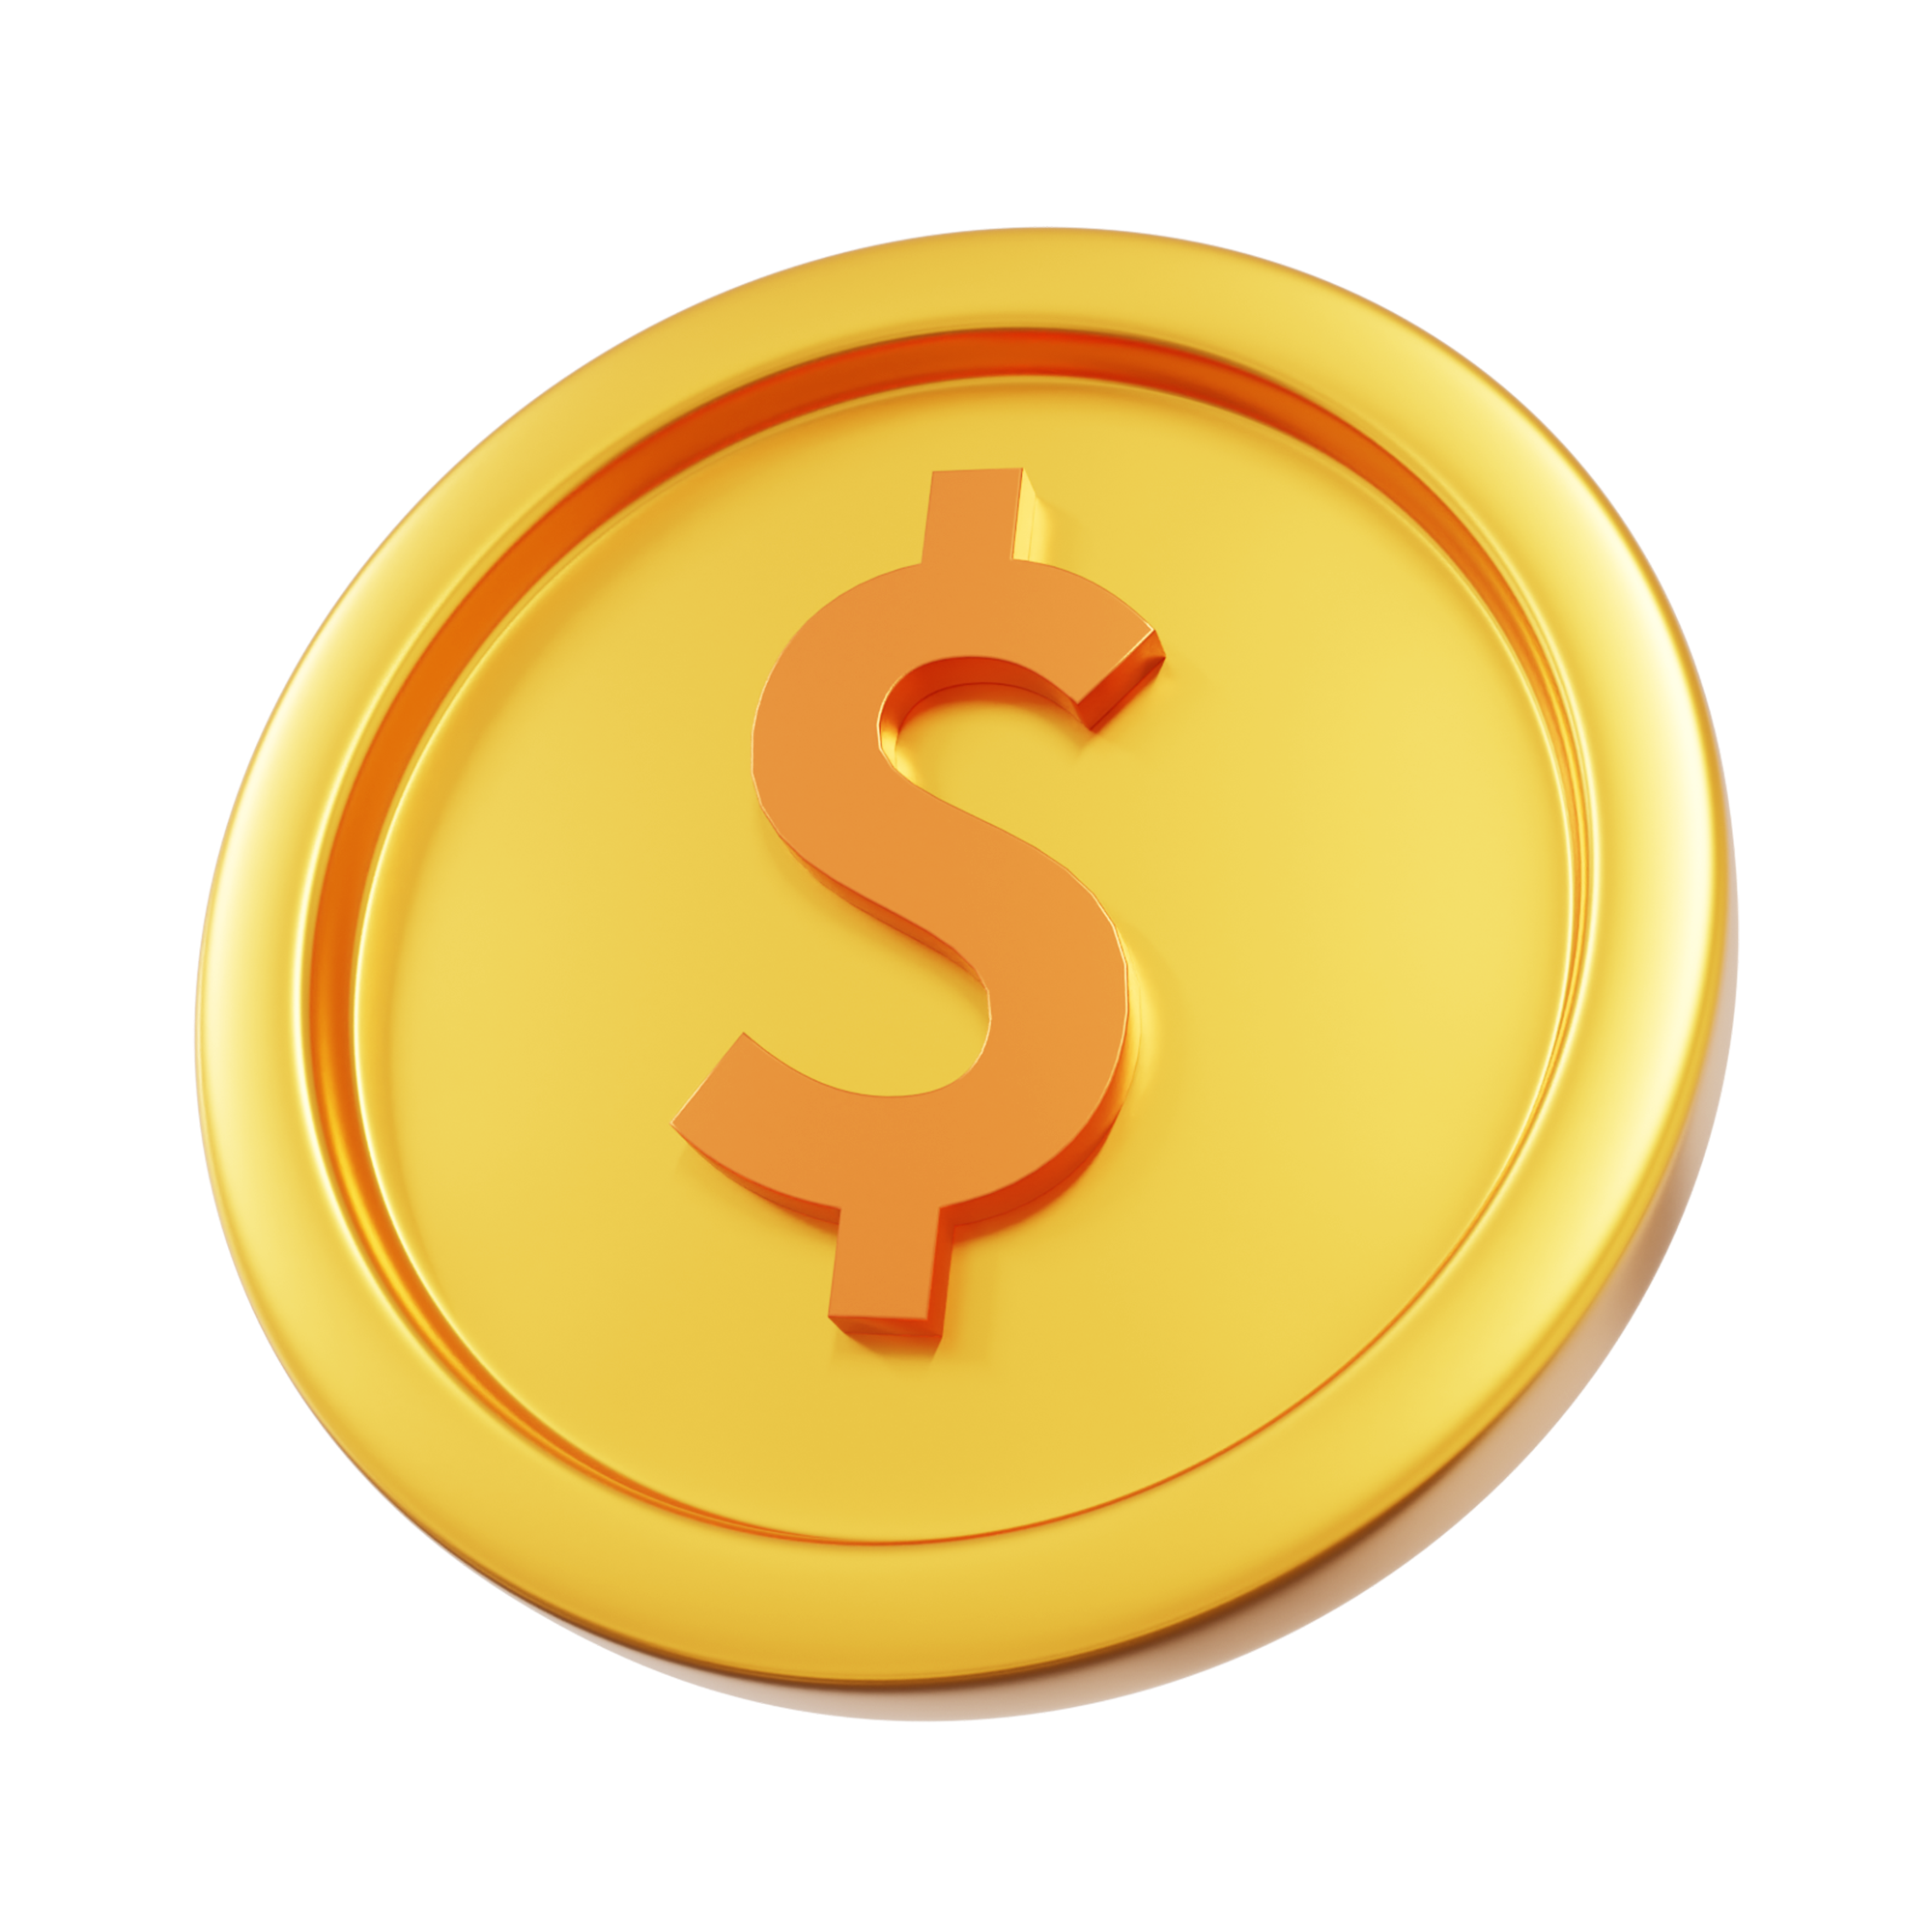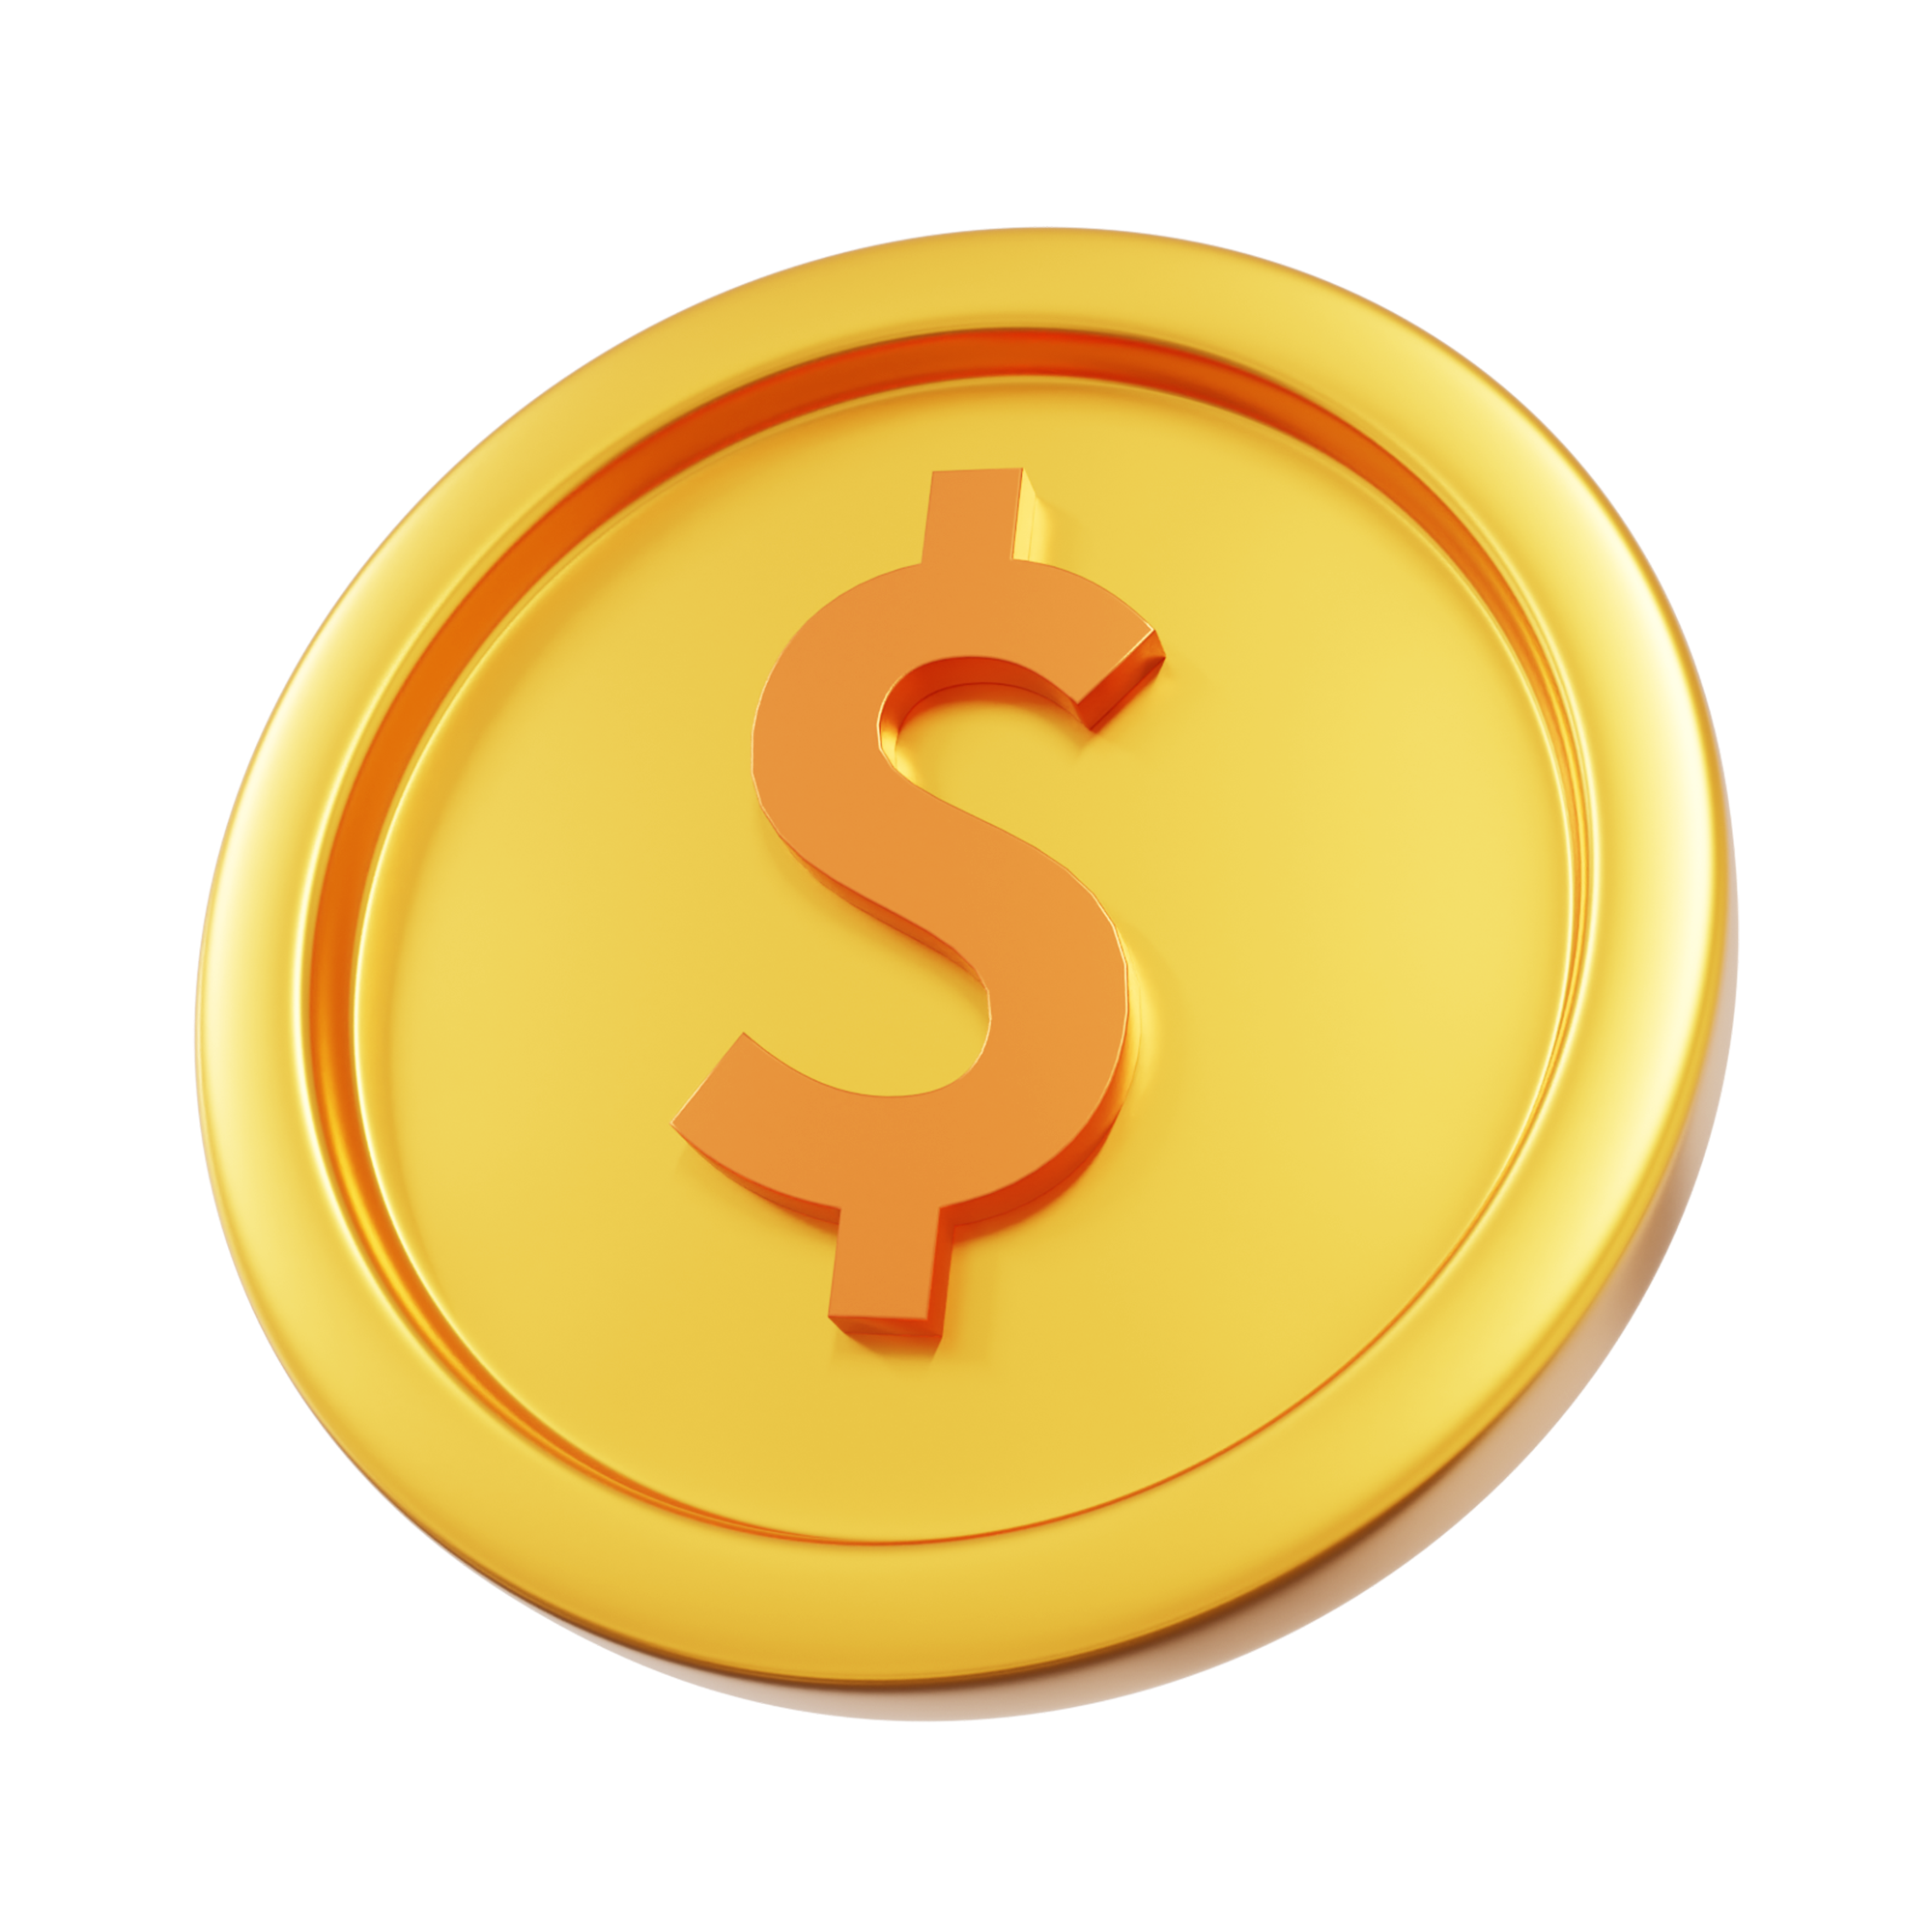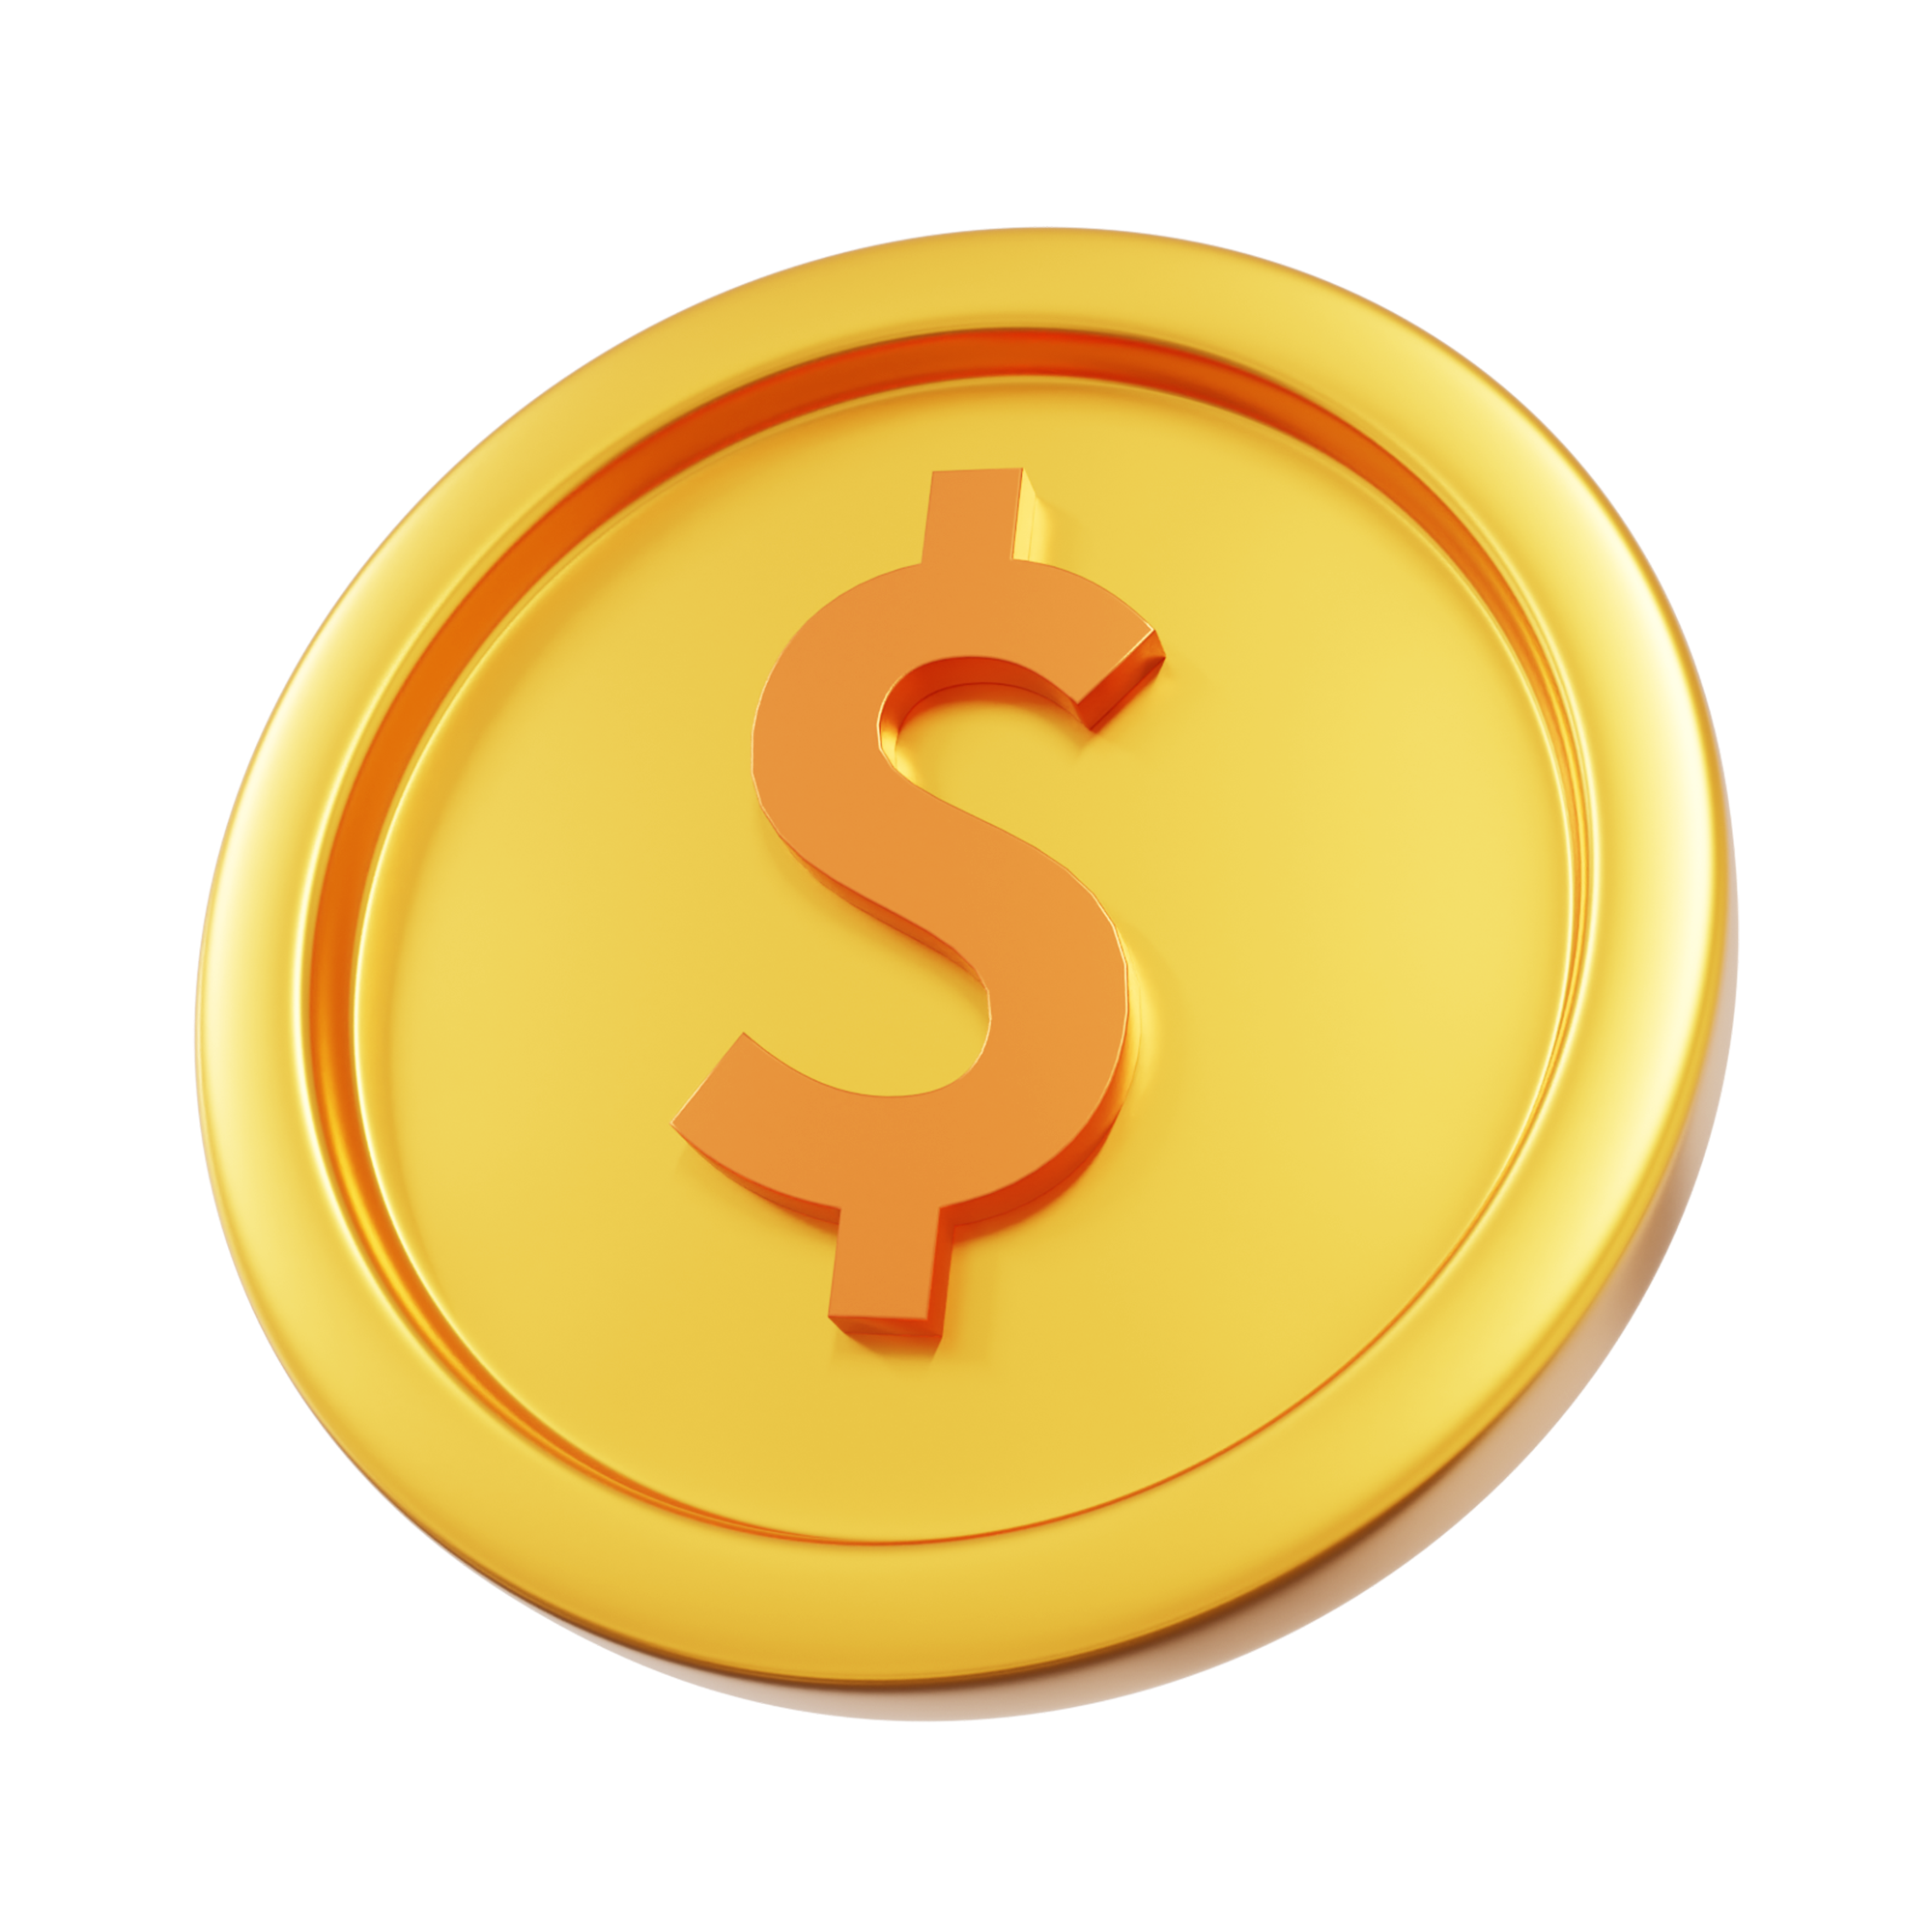 |
| Package Size | Small | 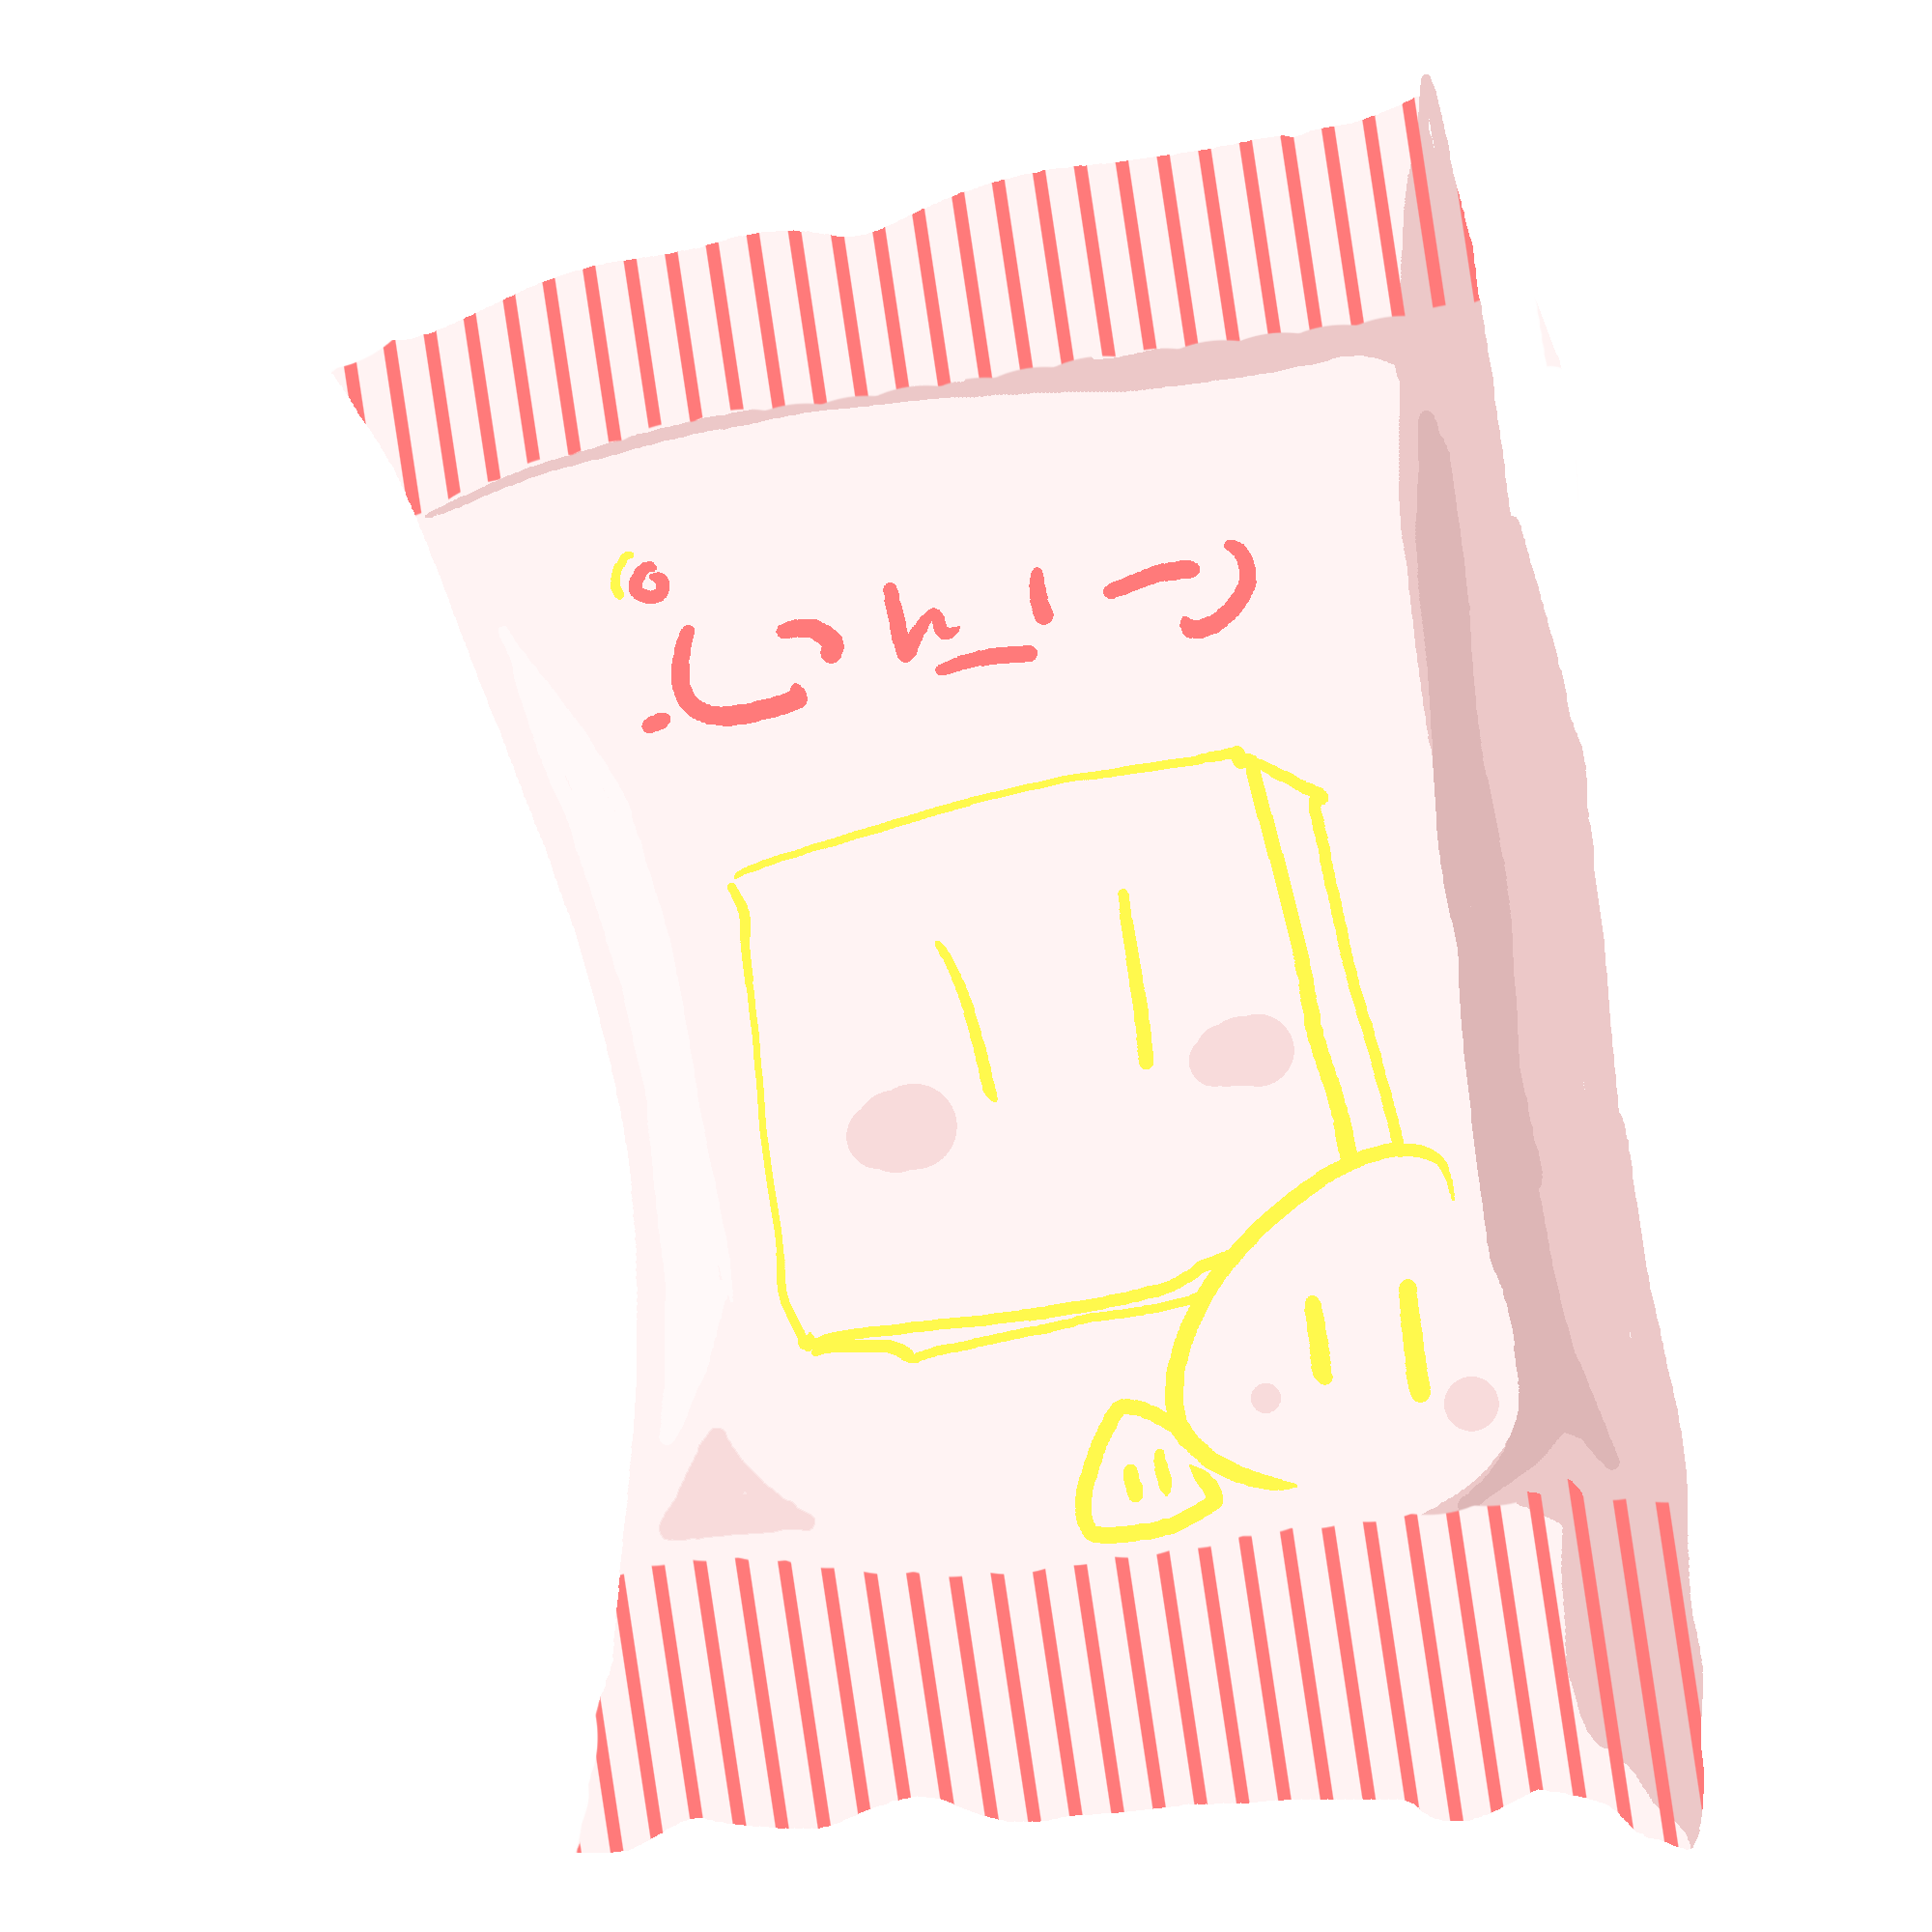 | Medium | 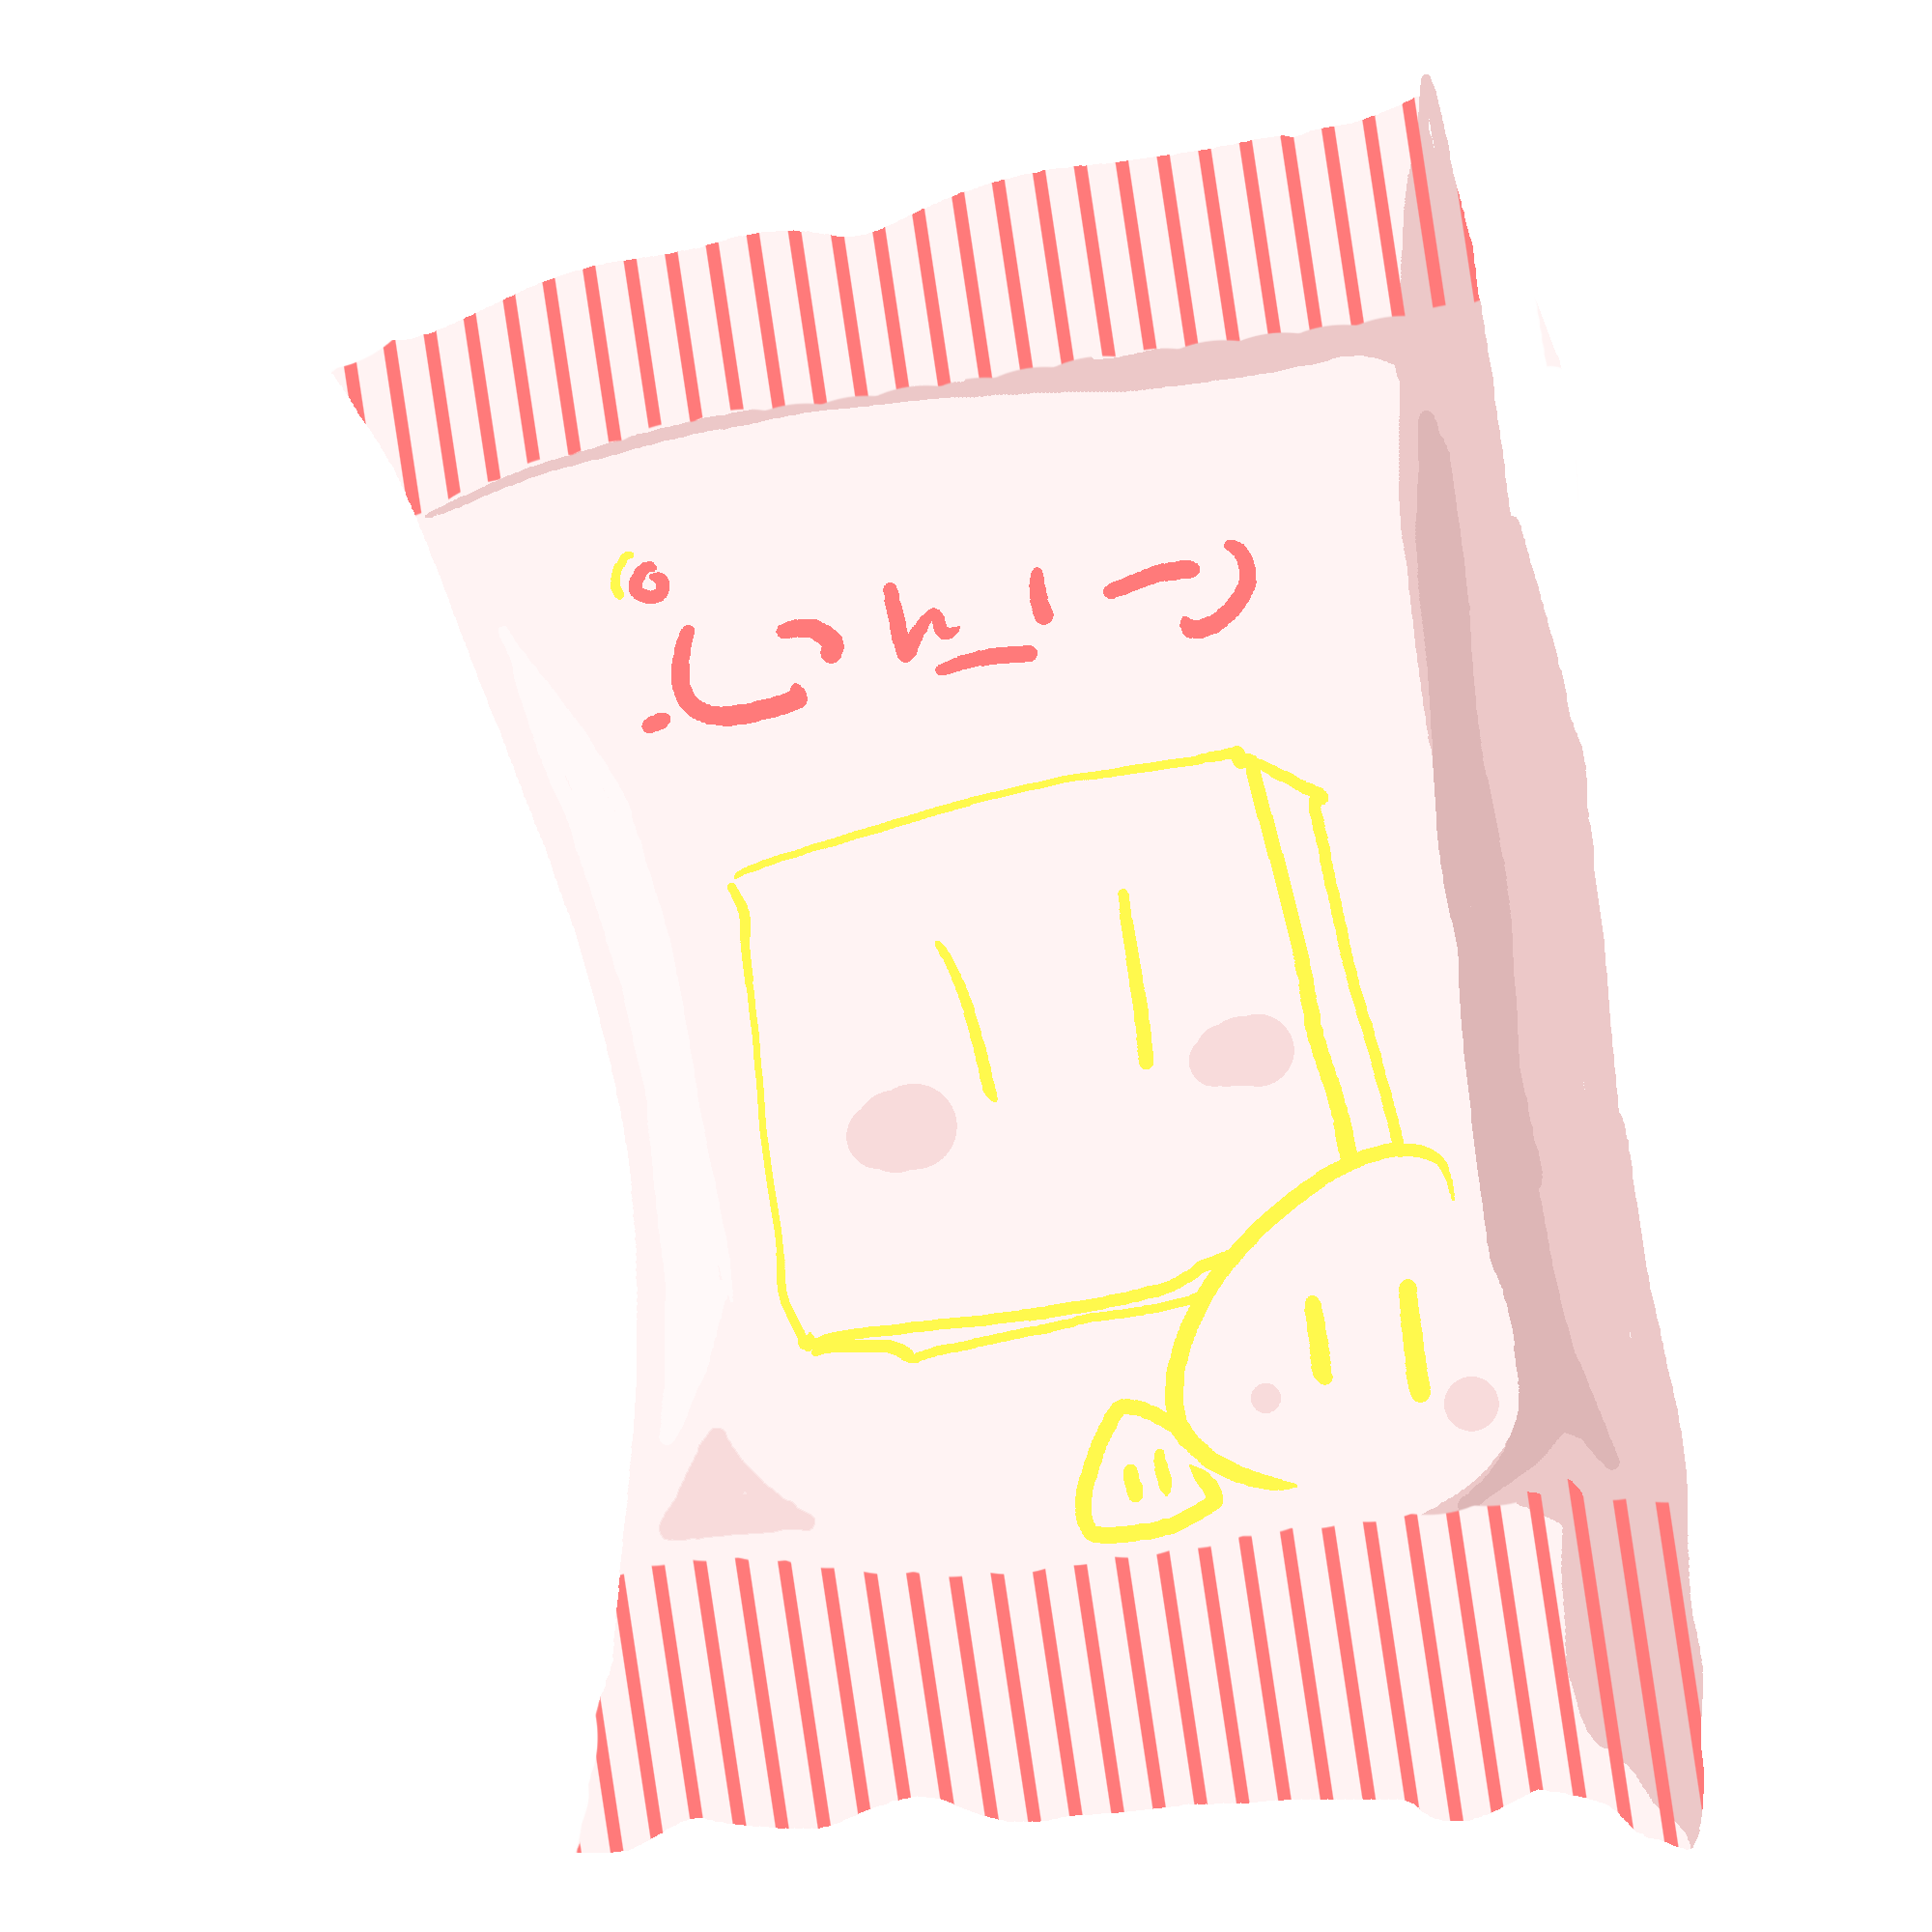 |
| Social Influence | Family Consumption Habits | 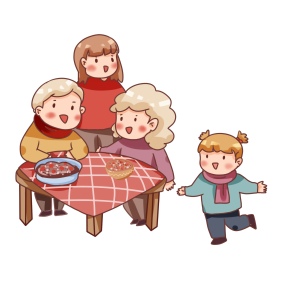 | Advertising/ Influencer Recommendations | 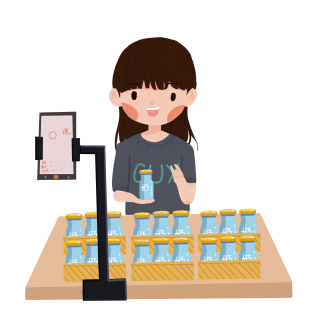 |
| Which option would you be more willing to choose | SnackA □ | | SnackB □ | |
| Considering your daily diet, would you consume this snack in real life?  Yes□ No□ | | | | |

Choice Set 5/8

| Snack Attributes | Snack A | | Snack B | |
| --- | --- | --- | --- | --- |
| Taste | Sweet Flavor | 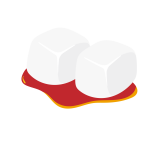 | Spicy  Flavor | 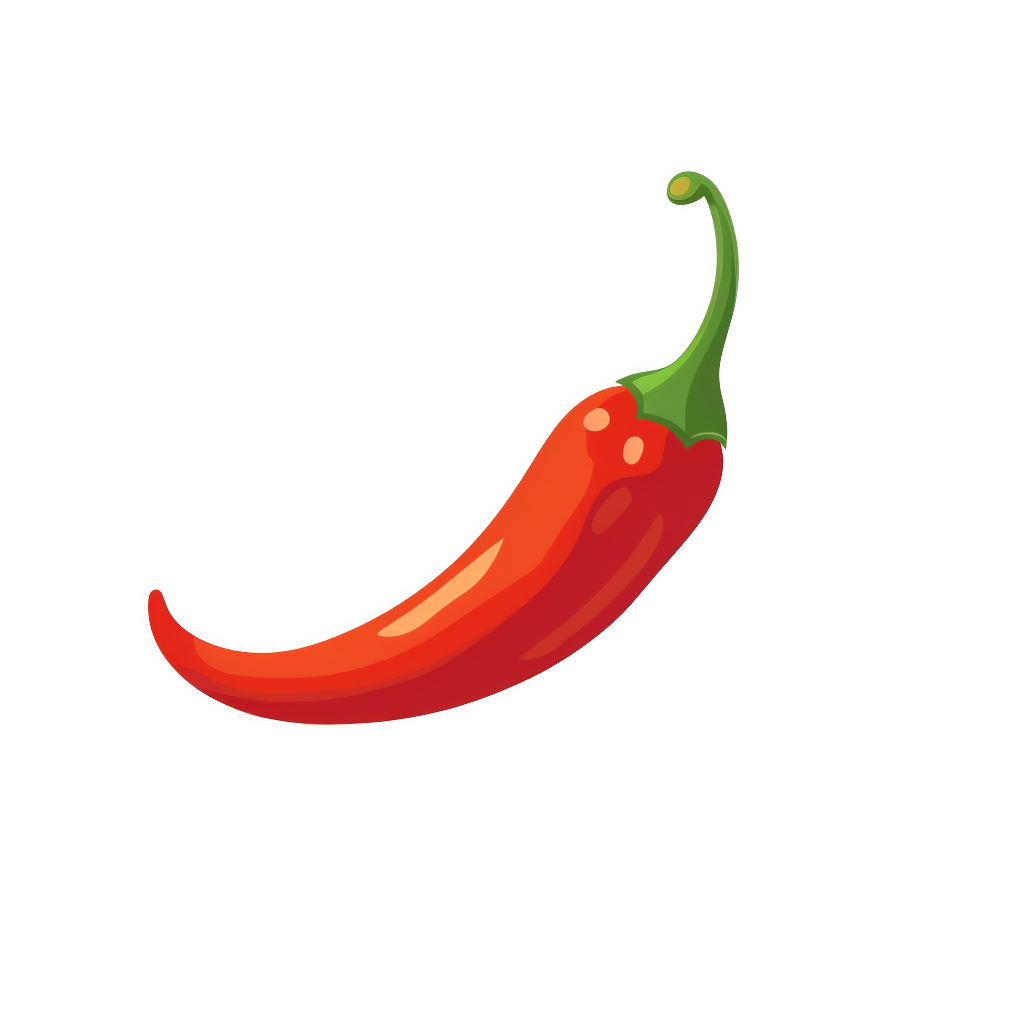 |
| Nutrient Claims | High Dietary Fiber | 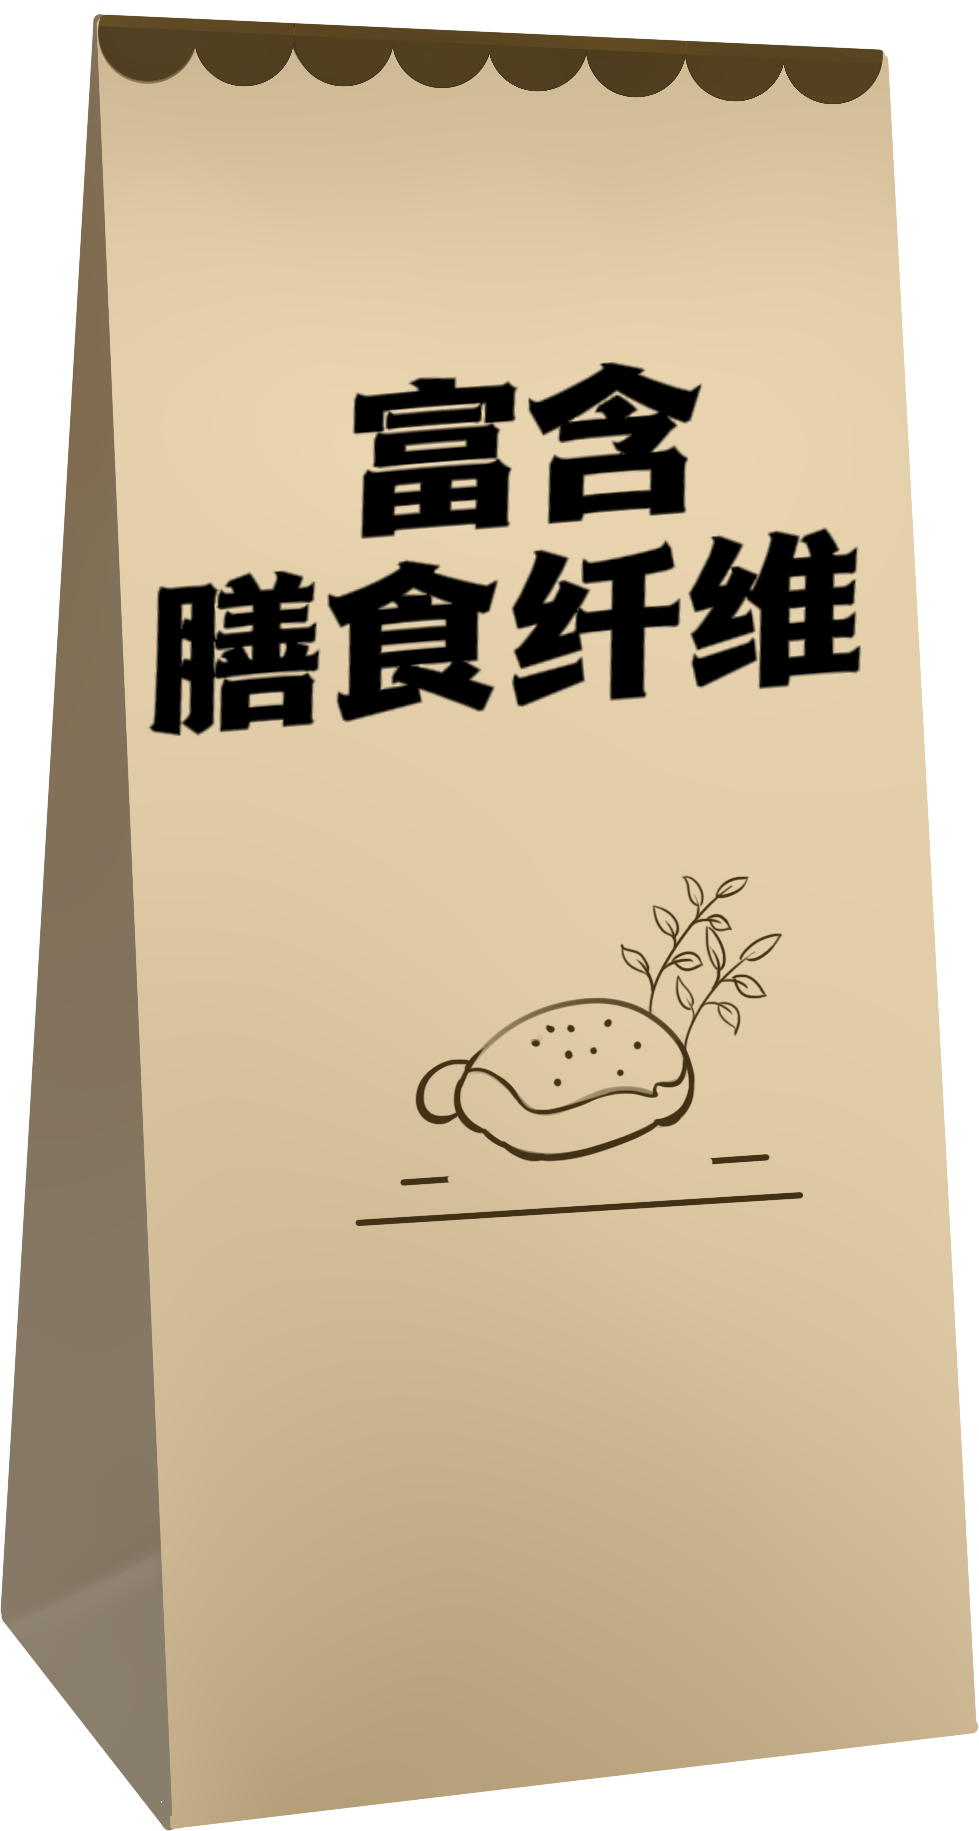 | Rich Minerals / Vitamins | 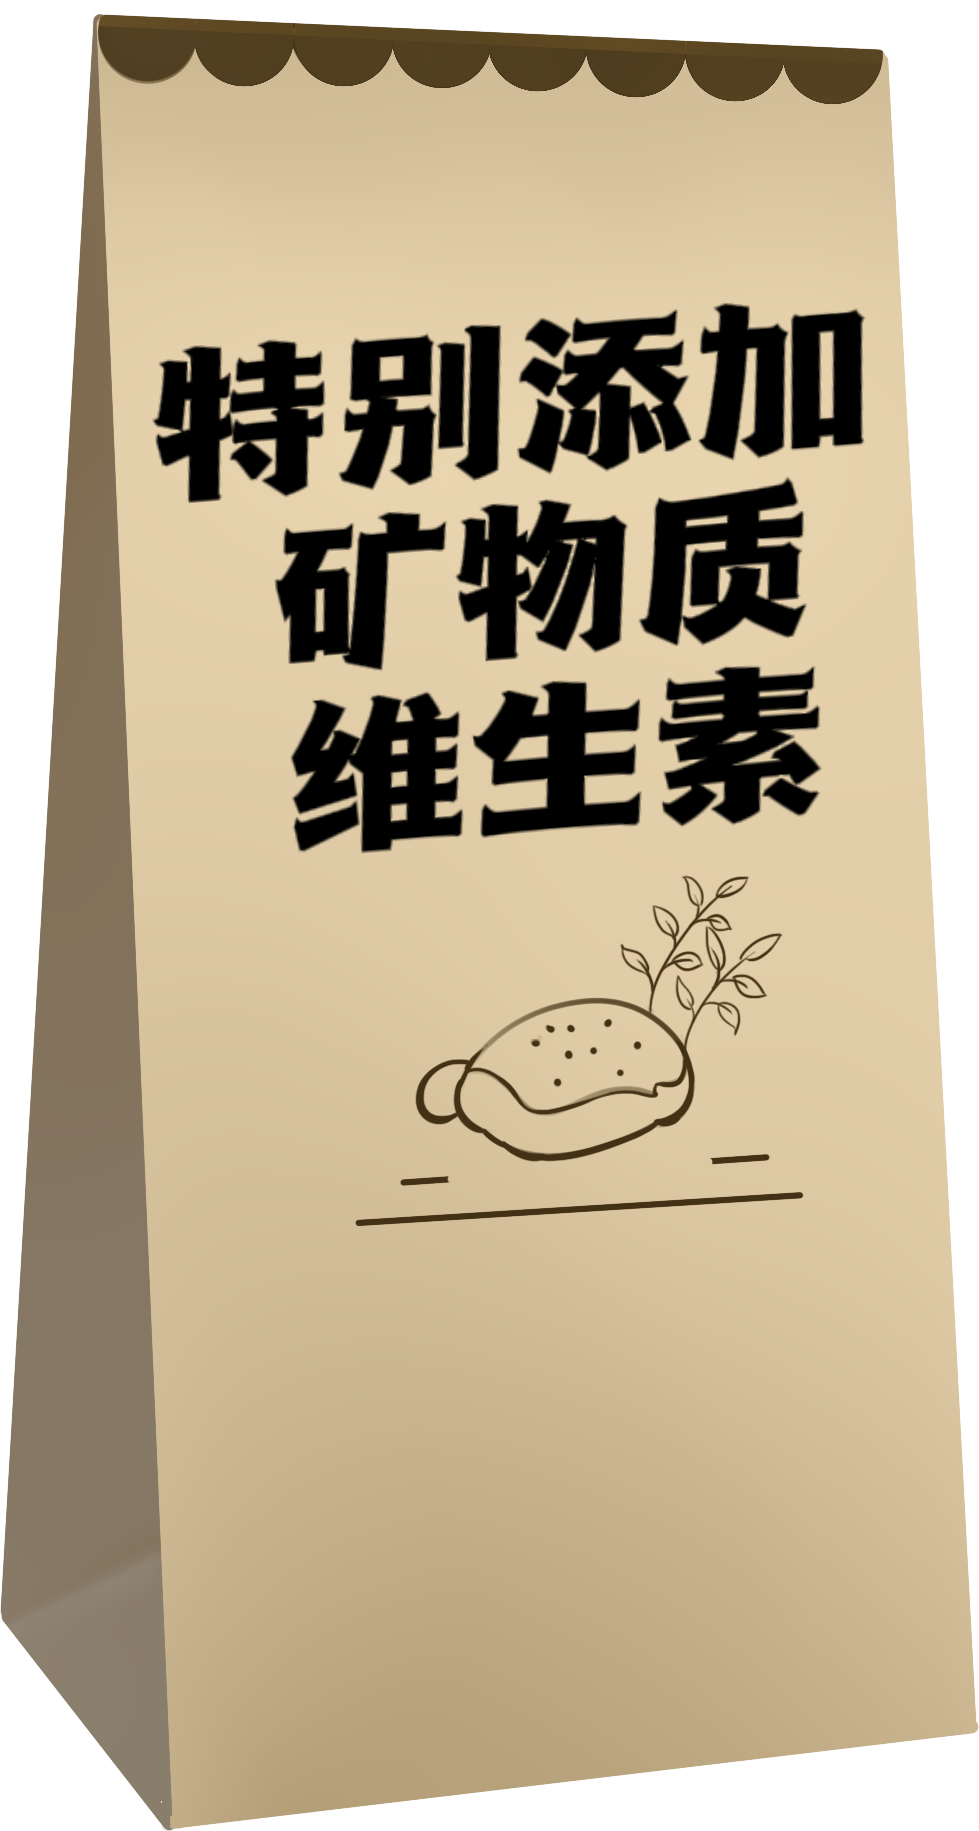 |
| Purchase Location | Supermarket/ Hypermarket | 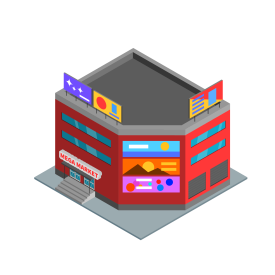 | Online | 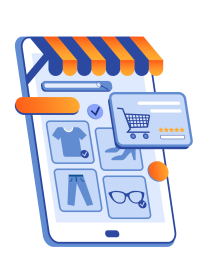 |
| Price | ≥10 ¥CNY | 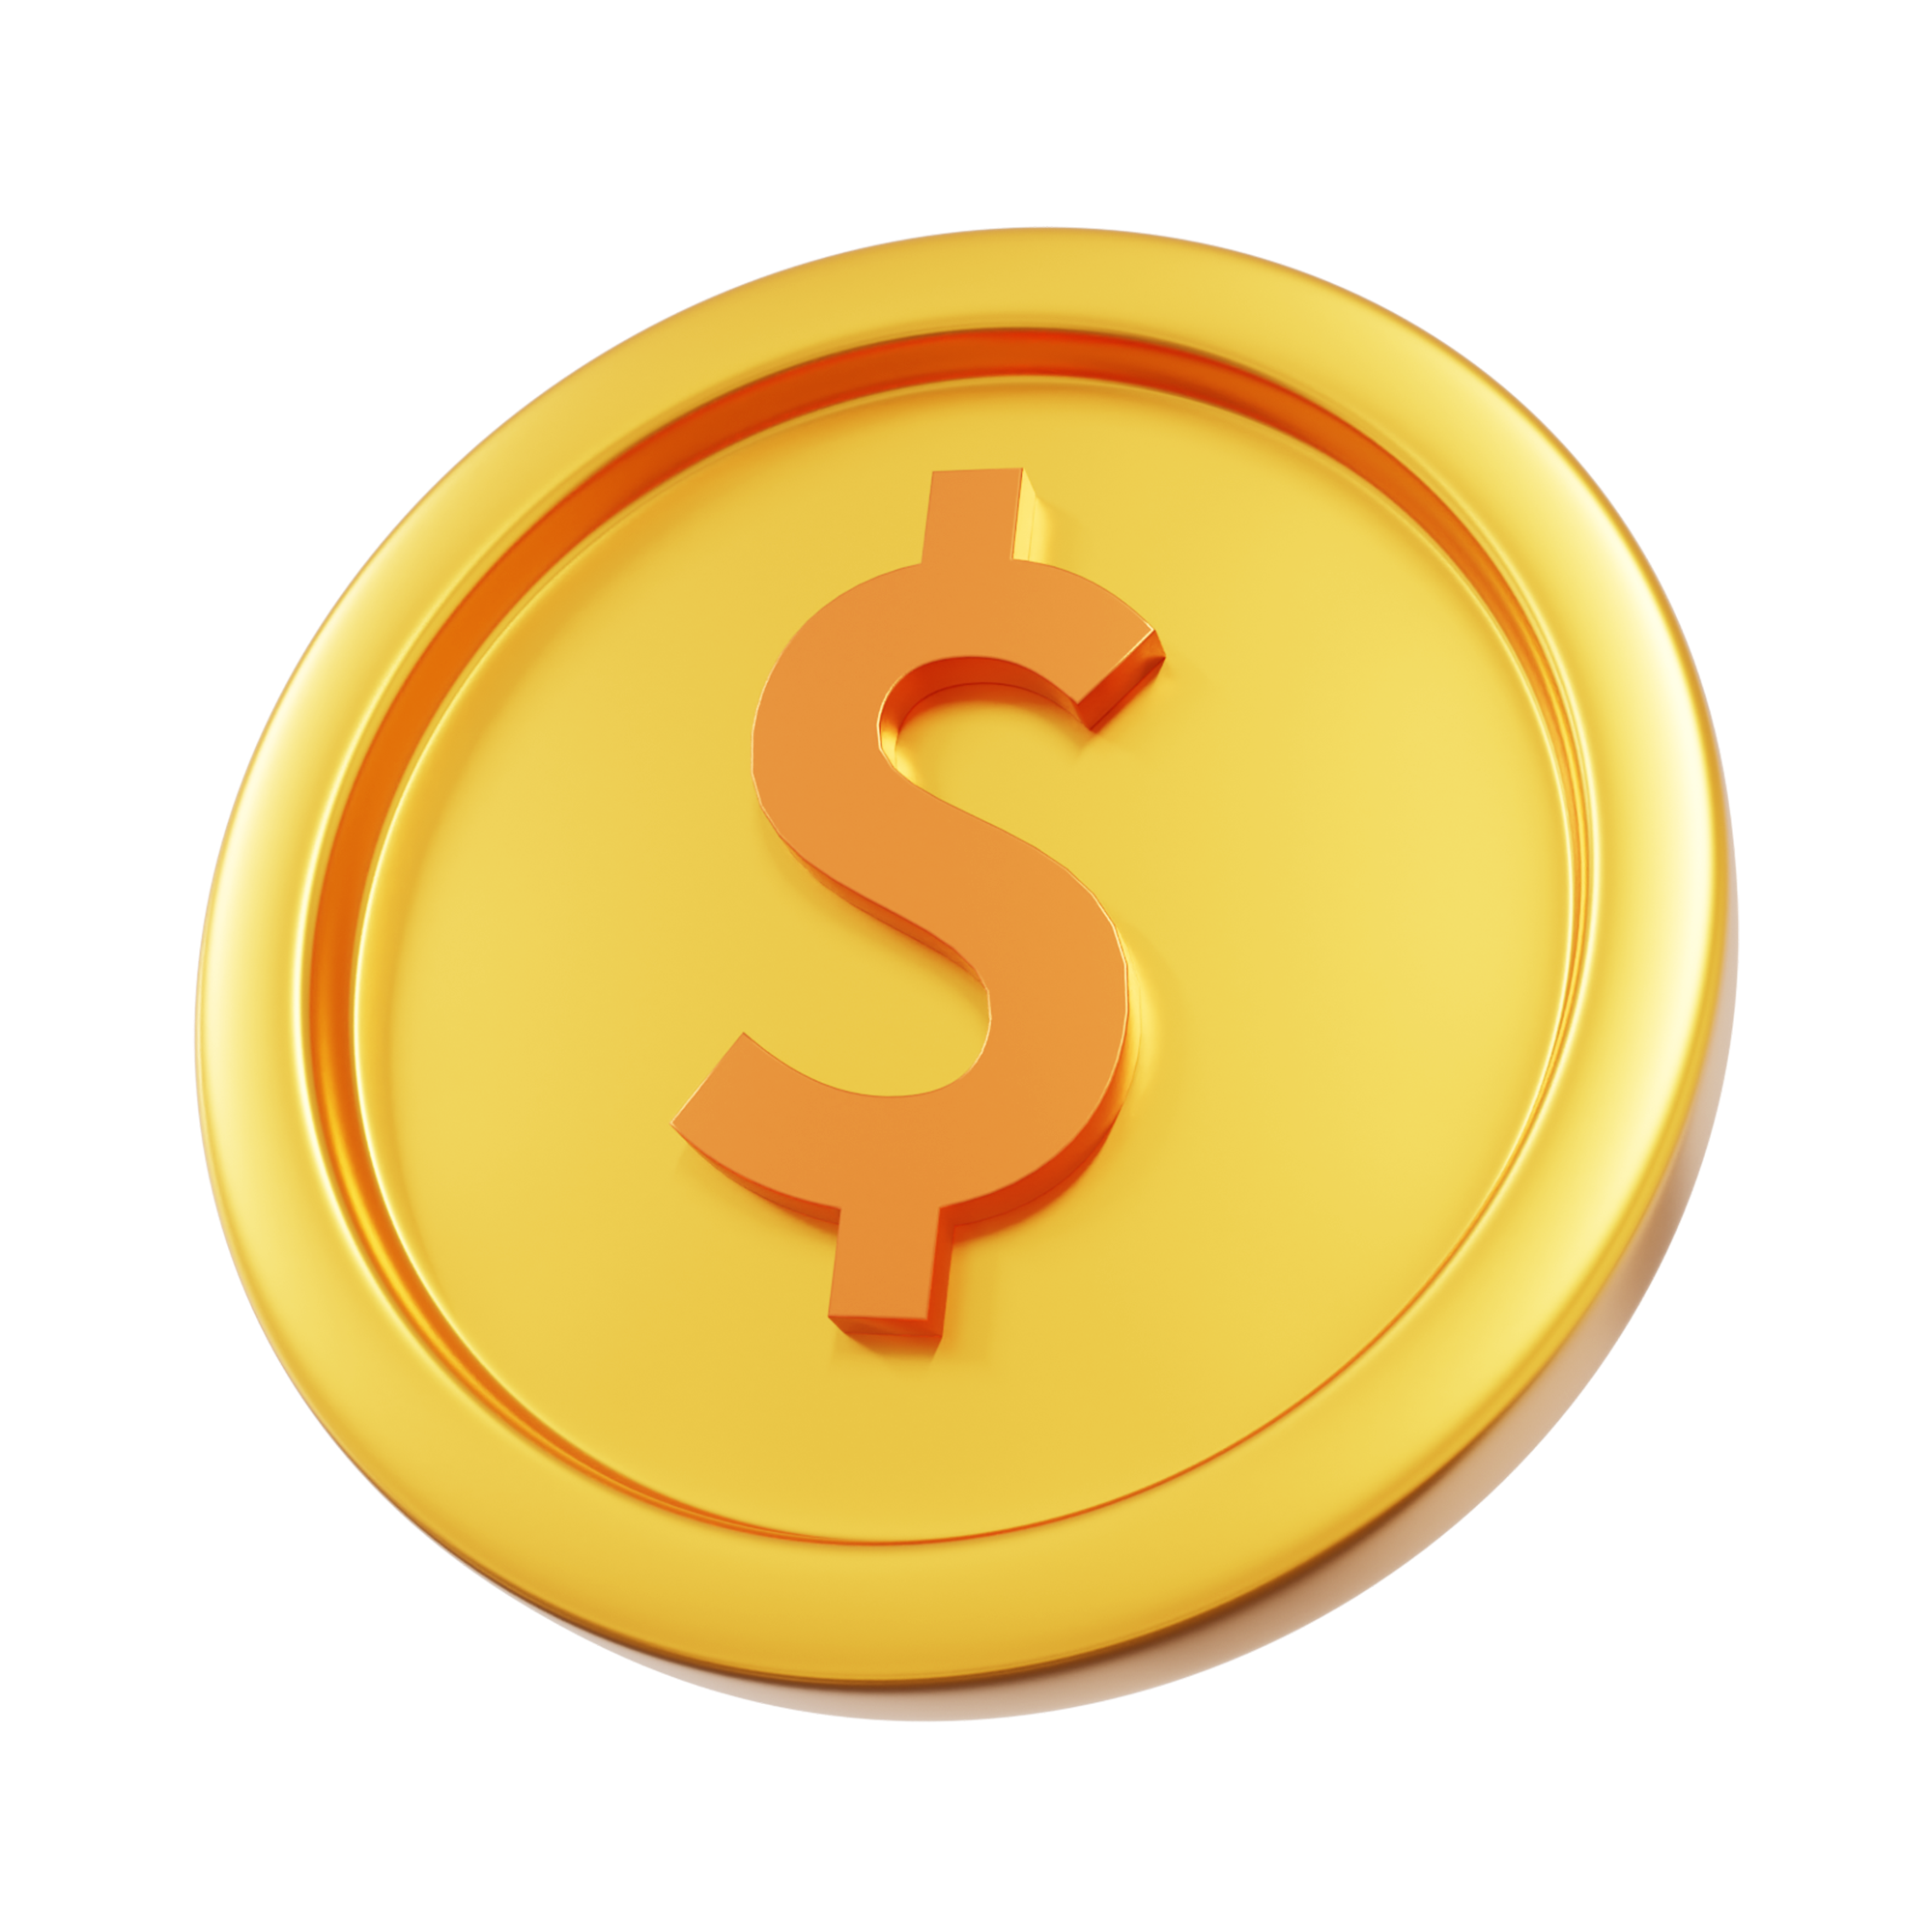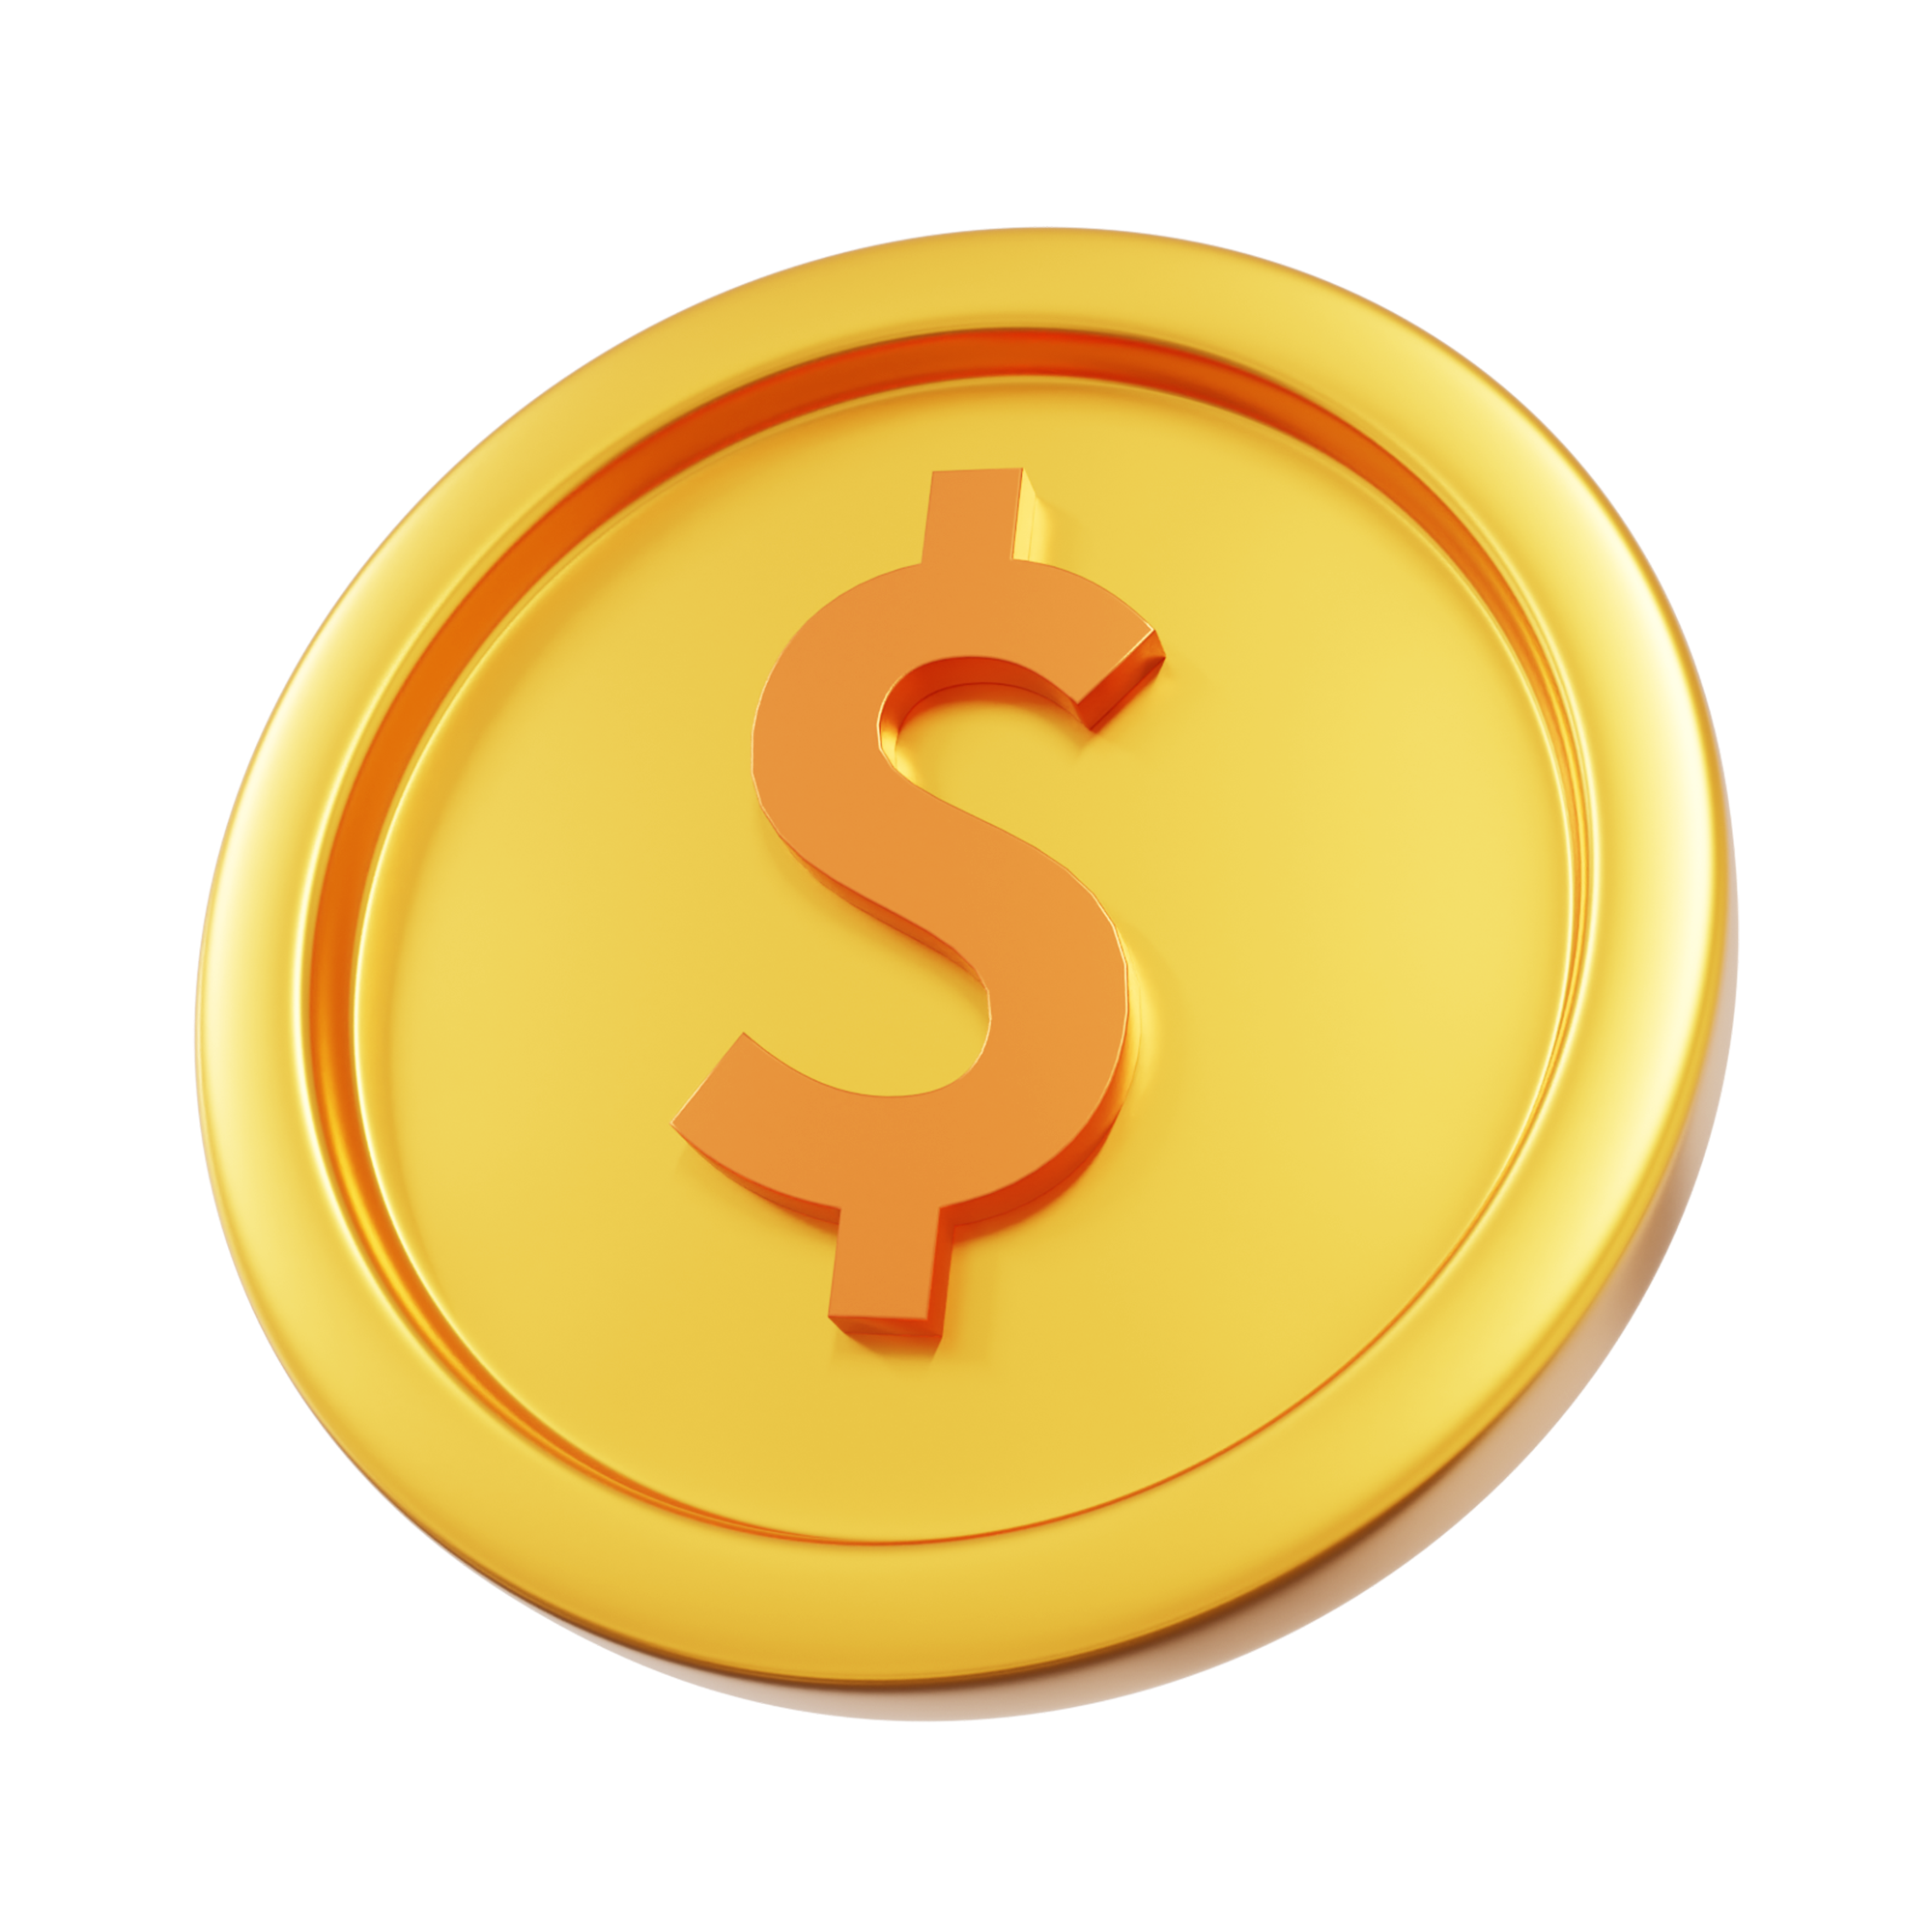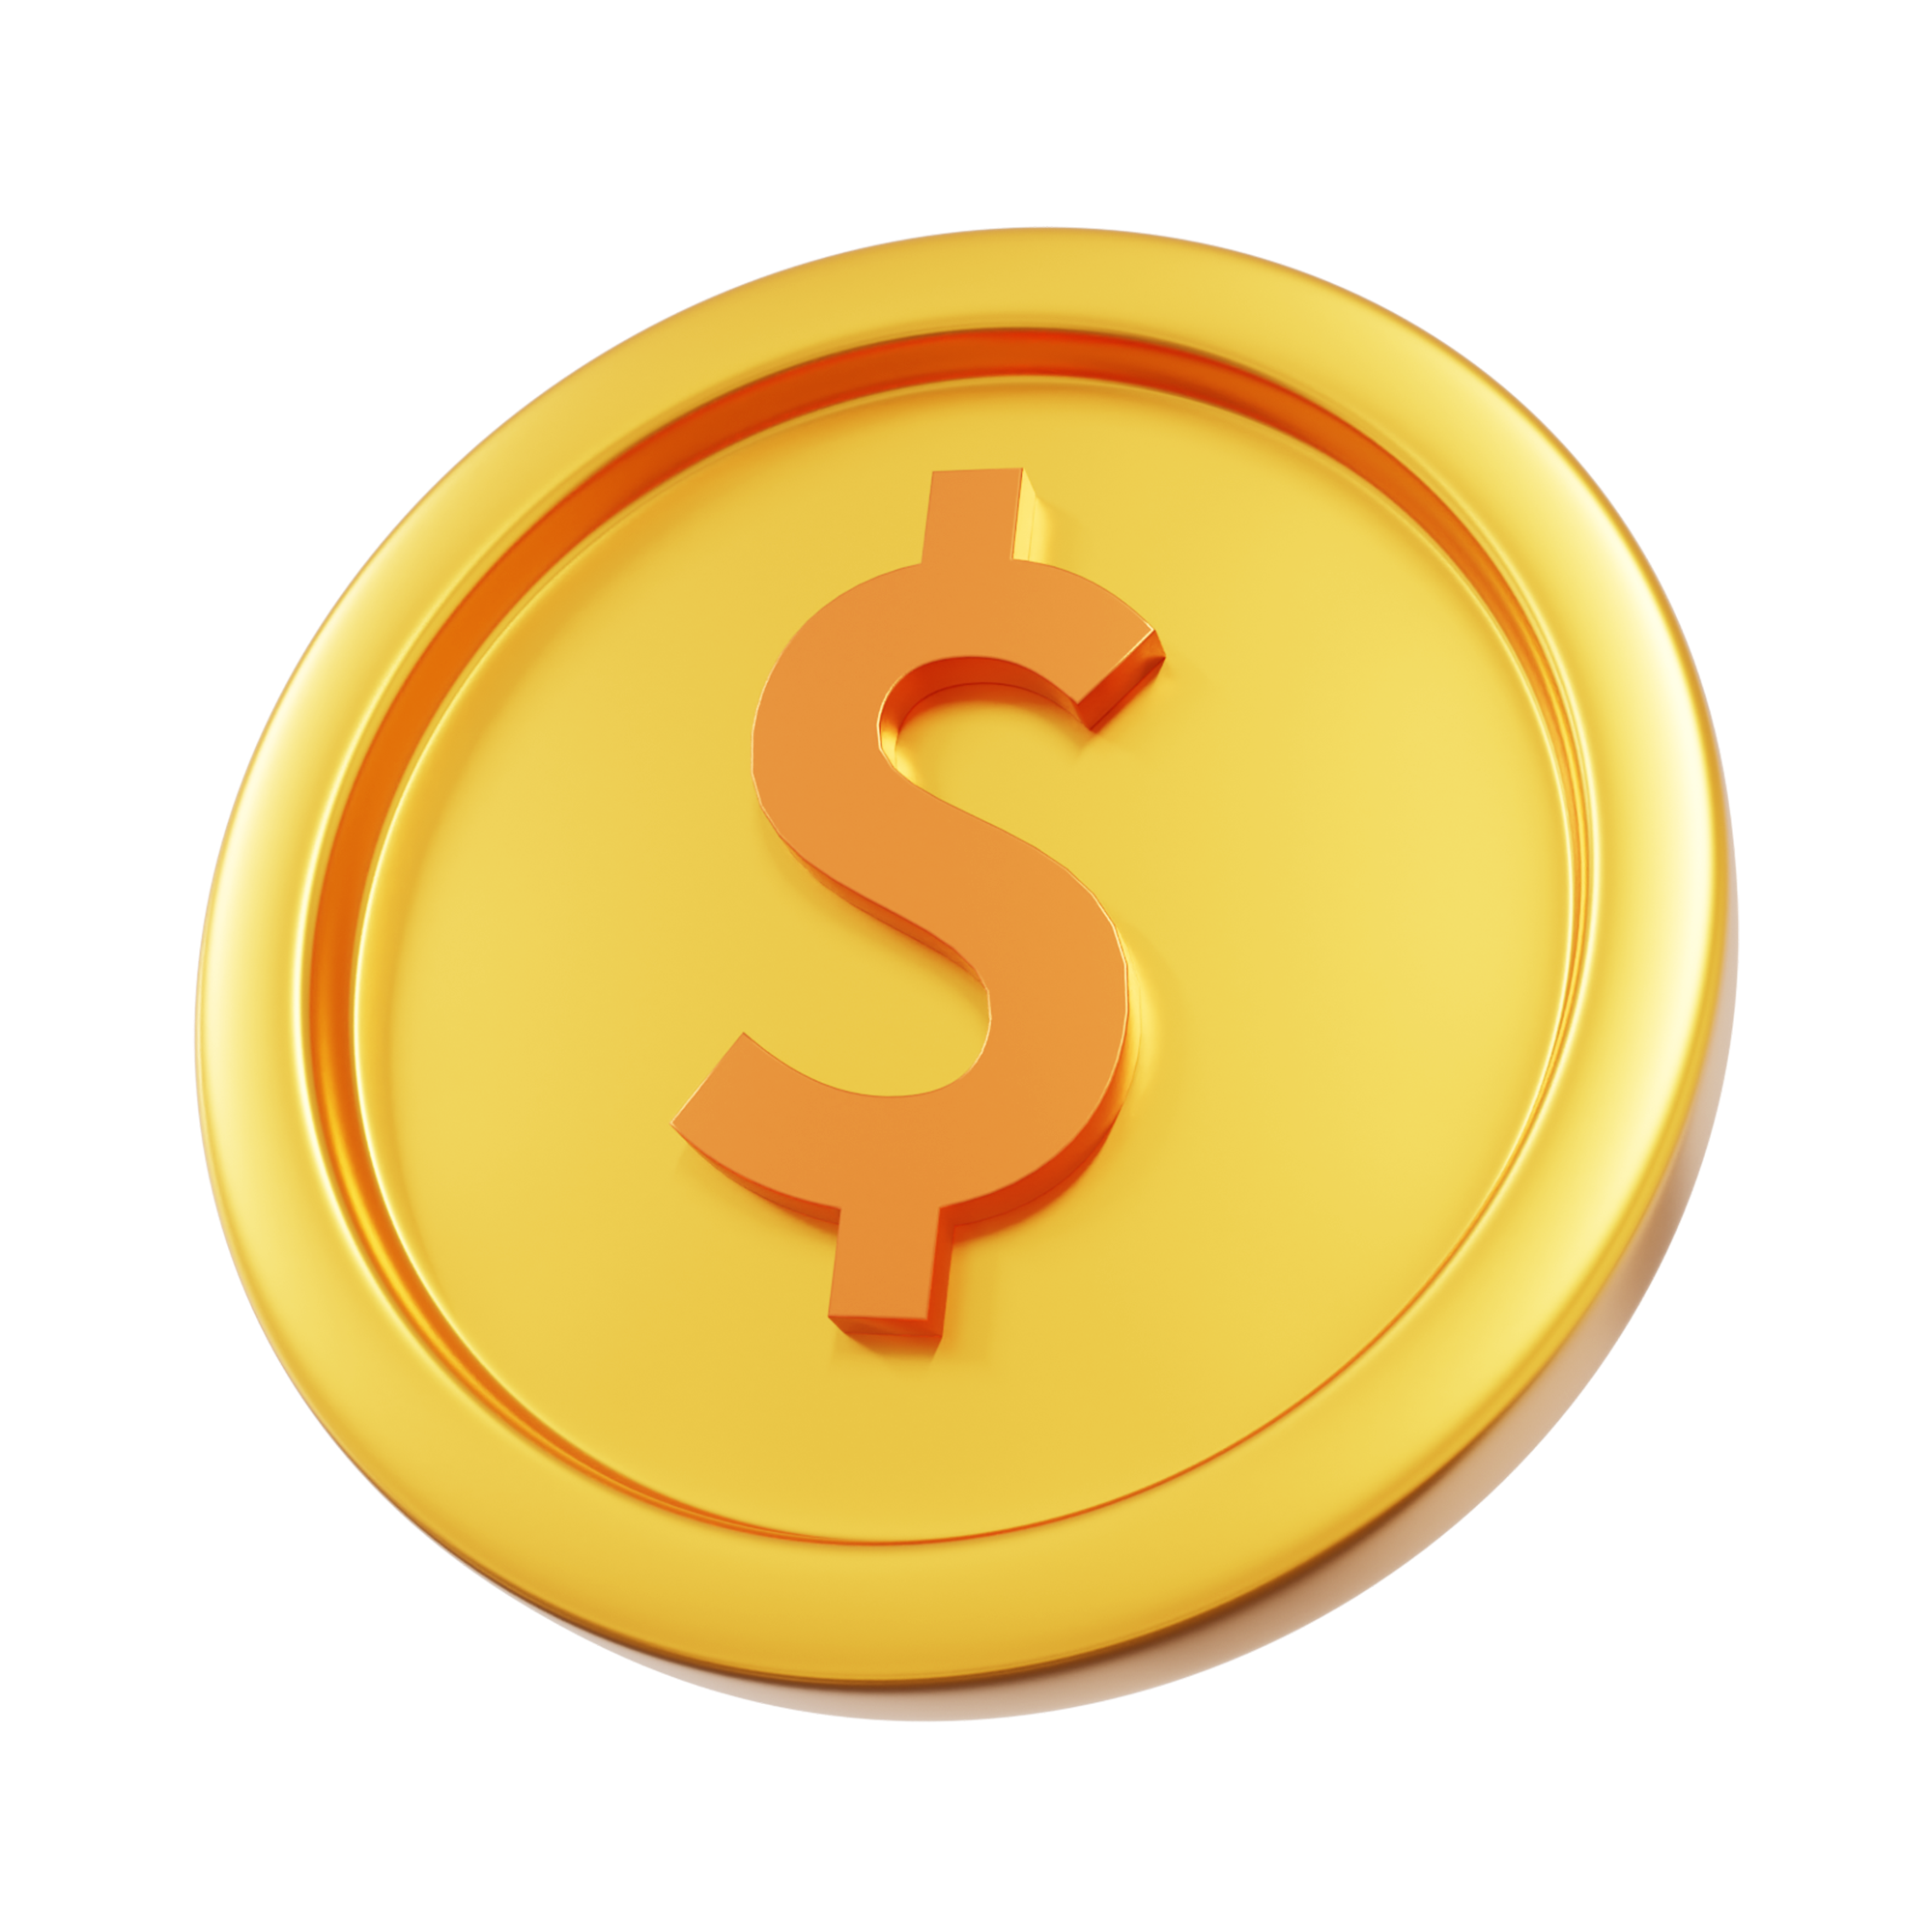 | 5~9 ¥CNY | 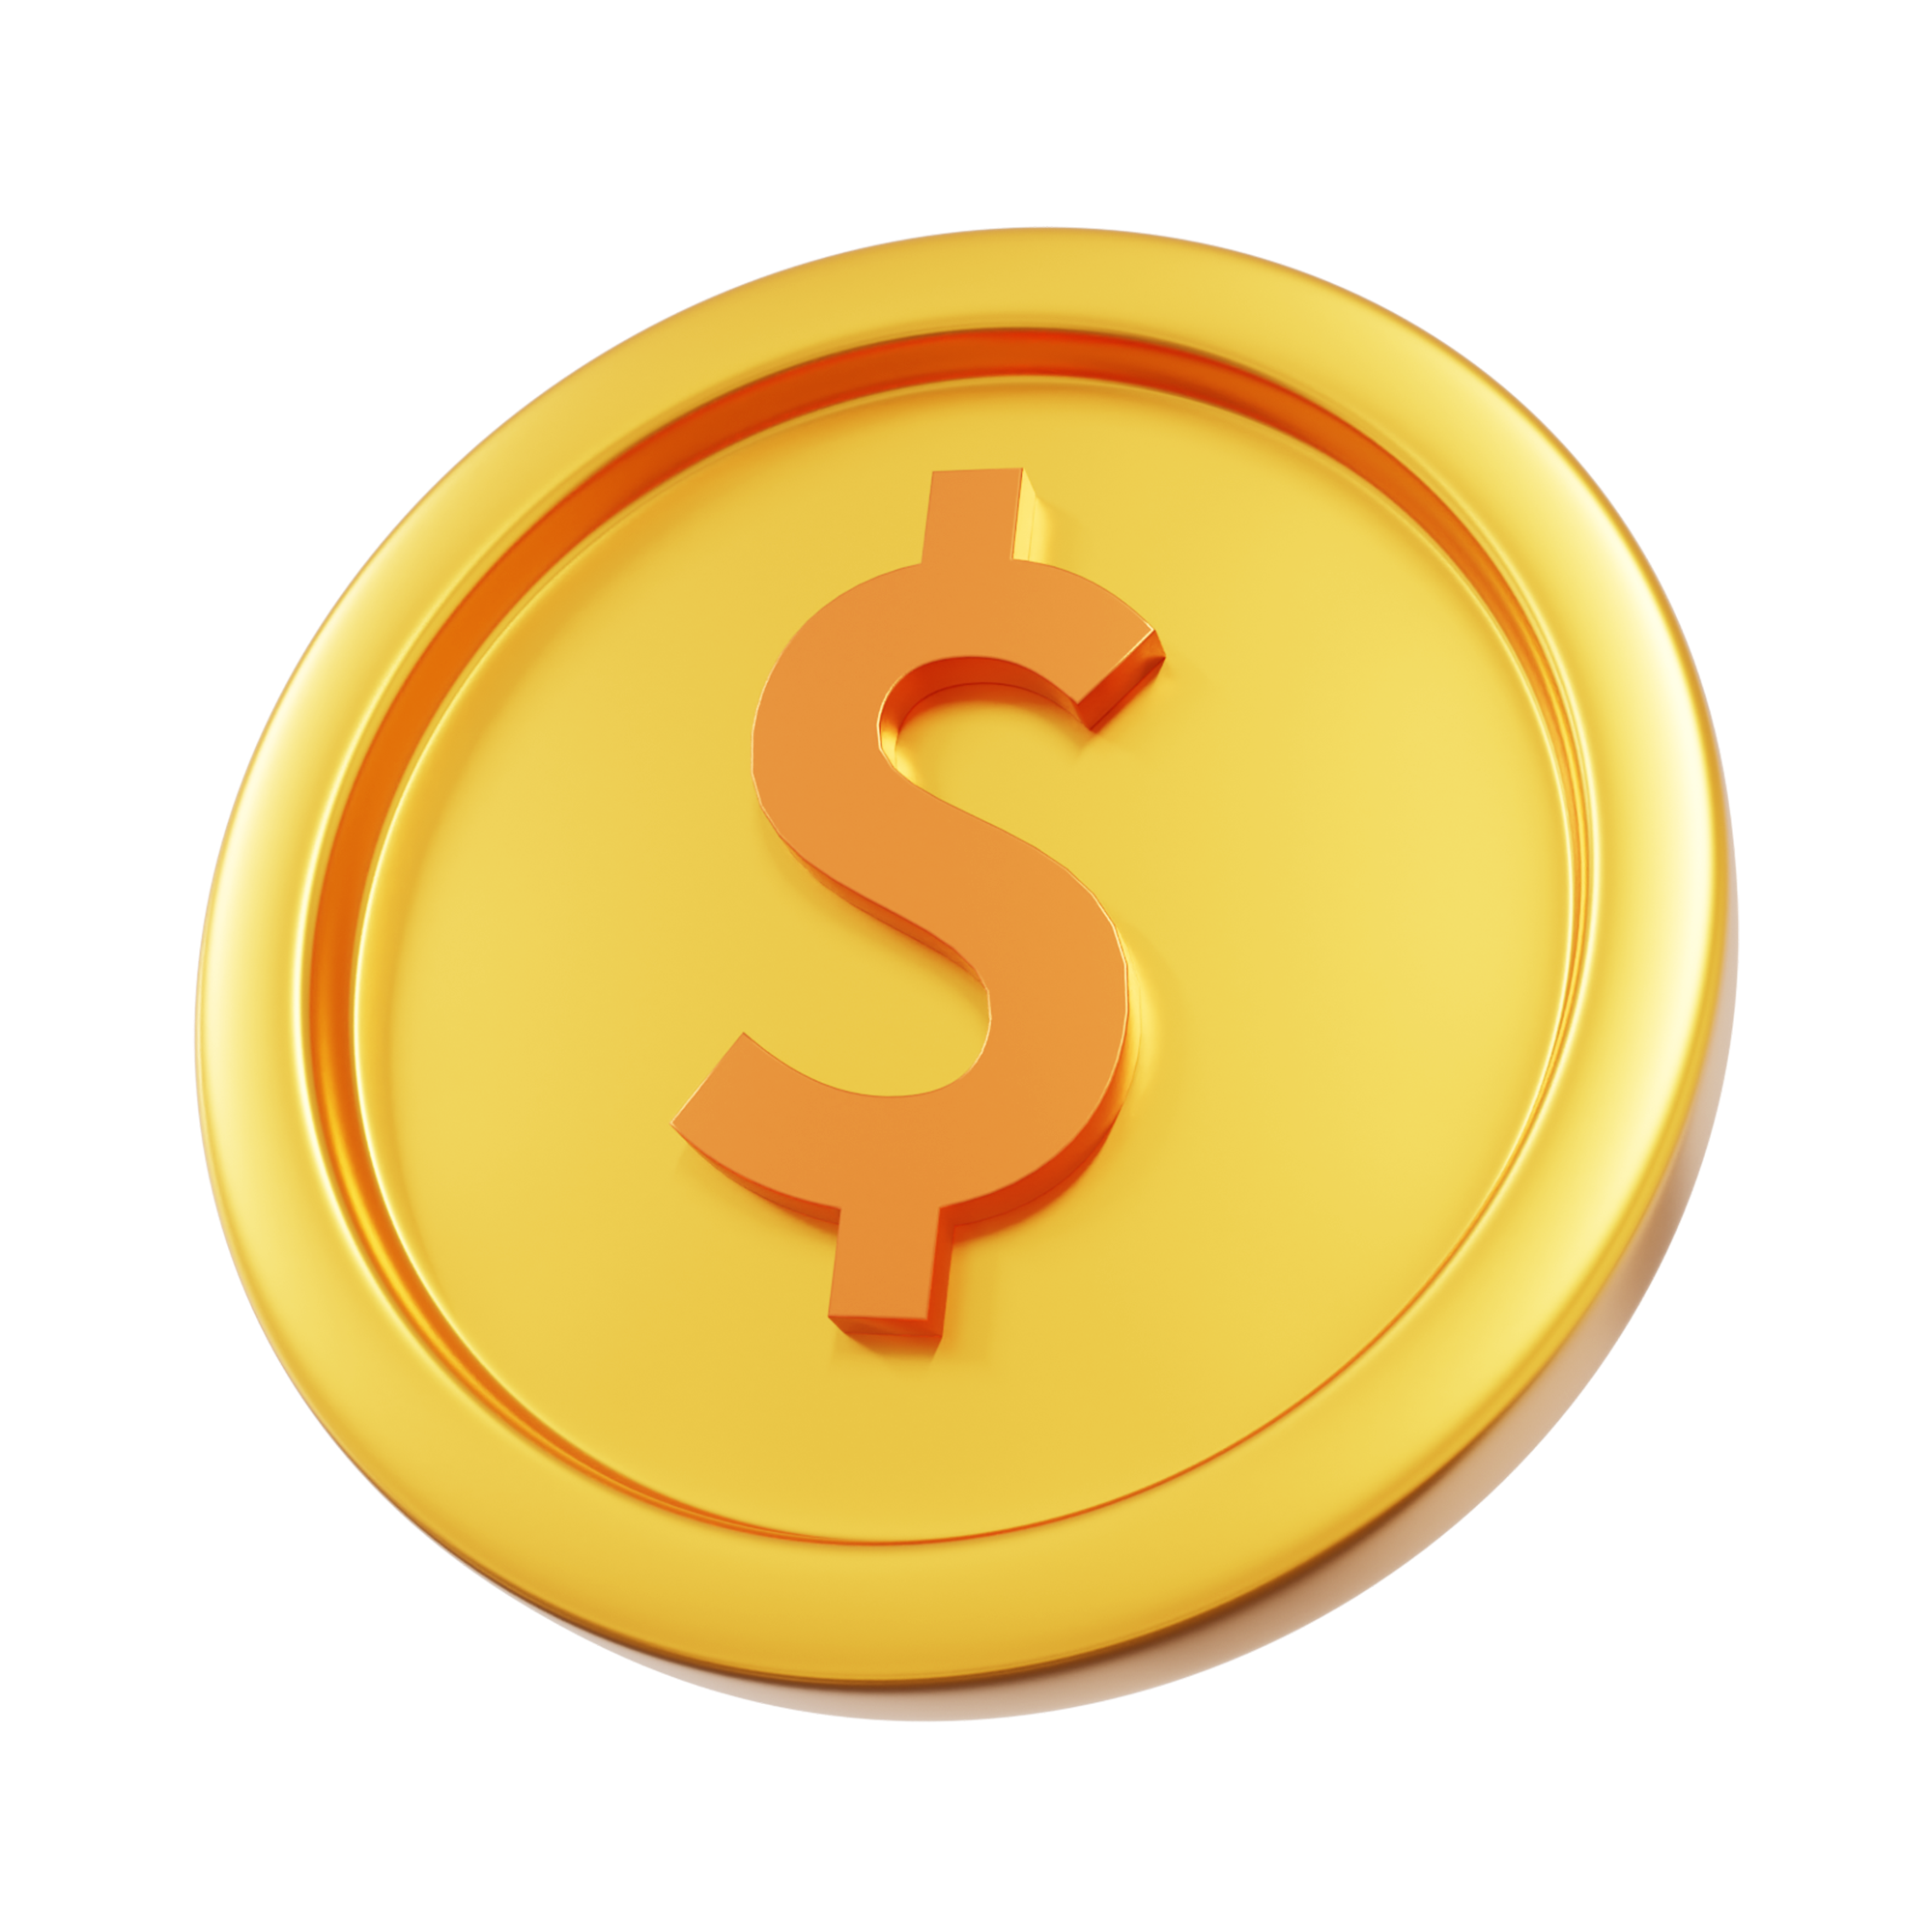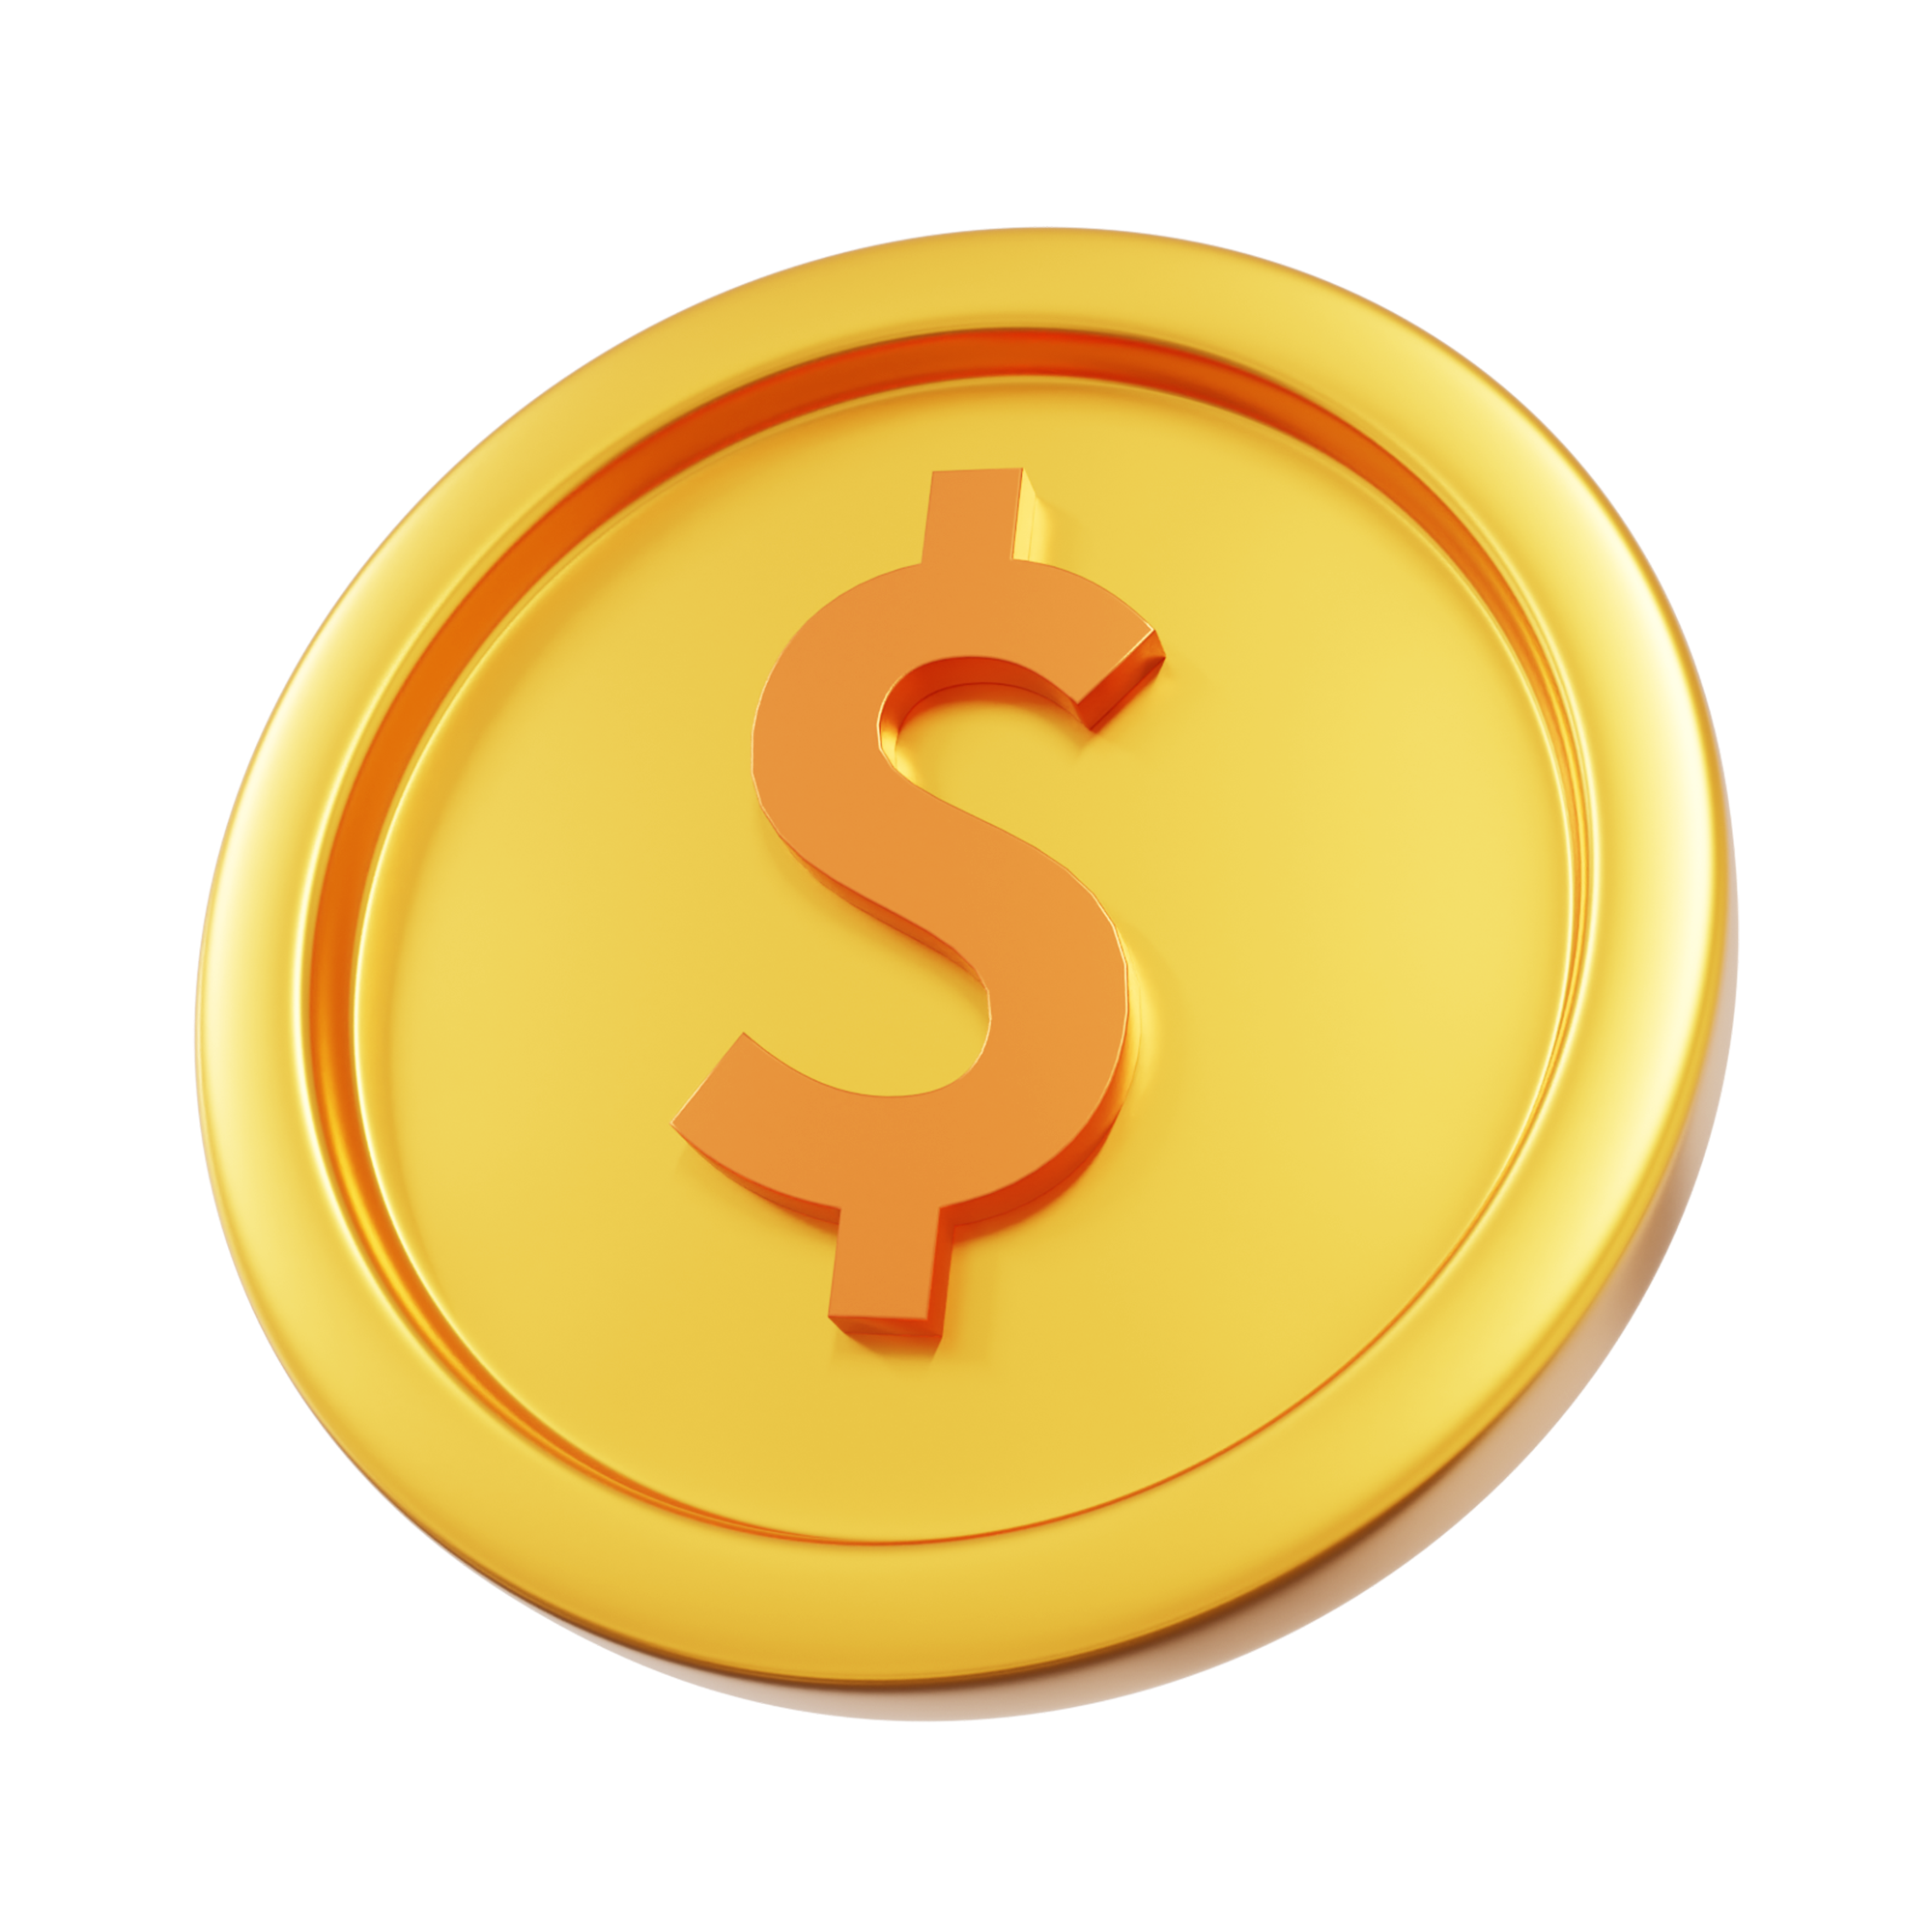 |
| Package Size | Small | 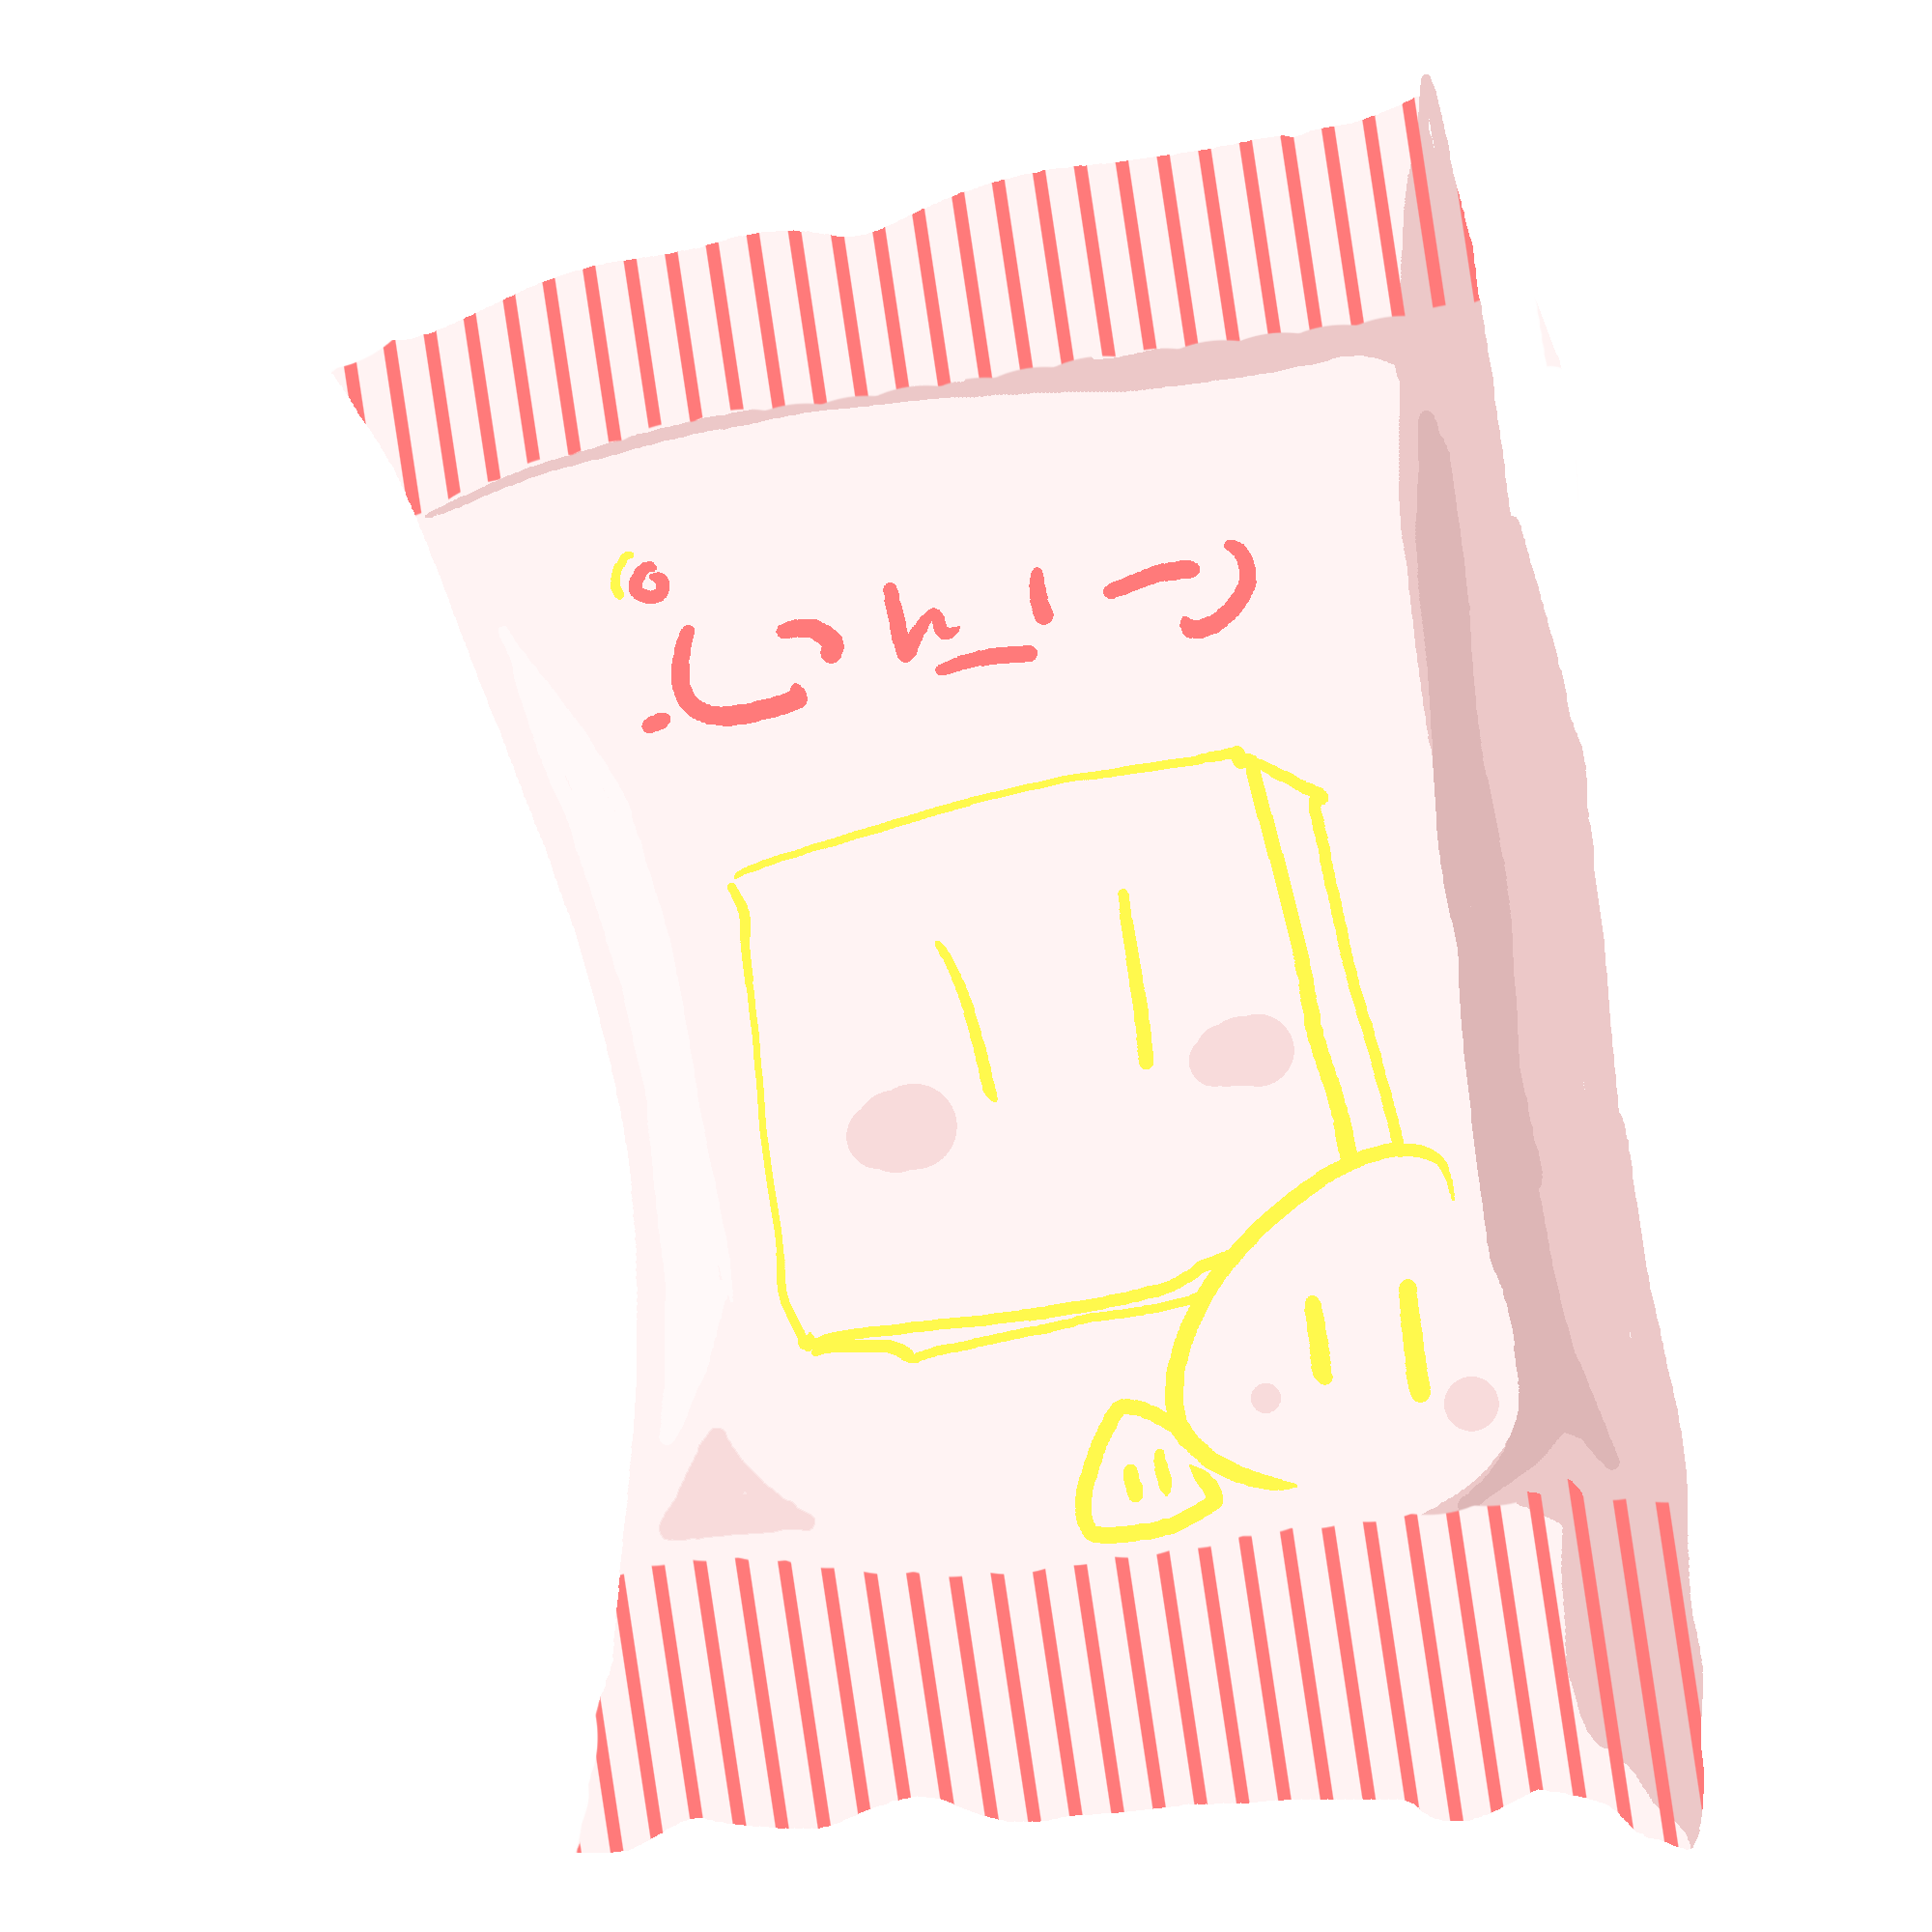 | Medium | 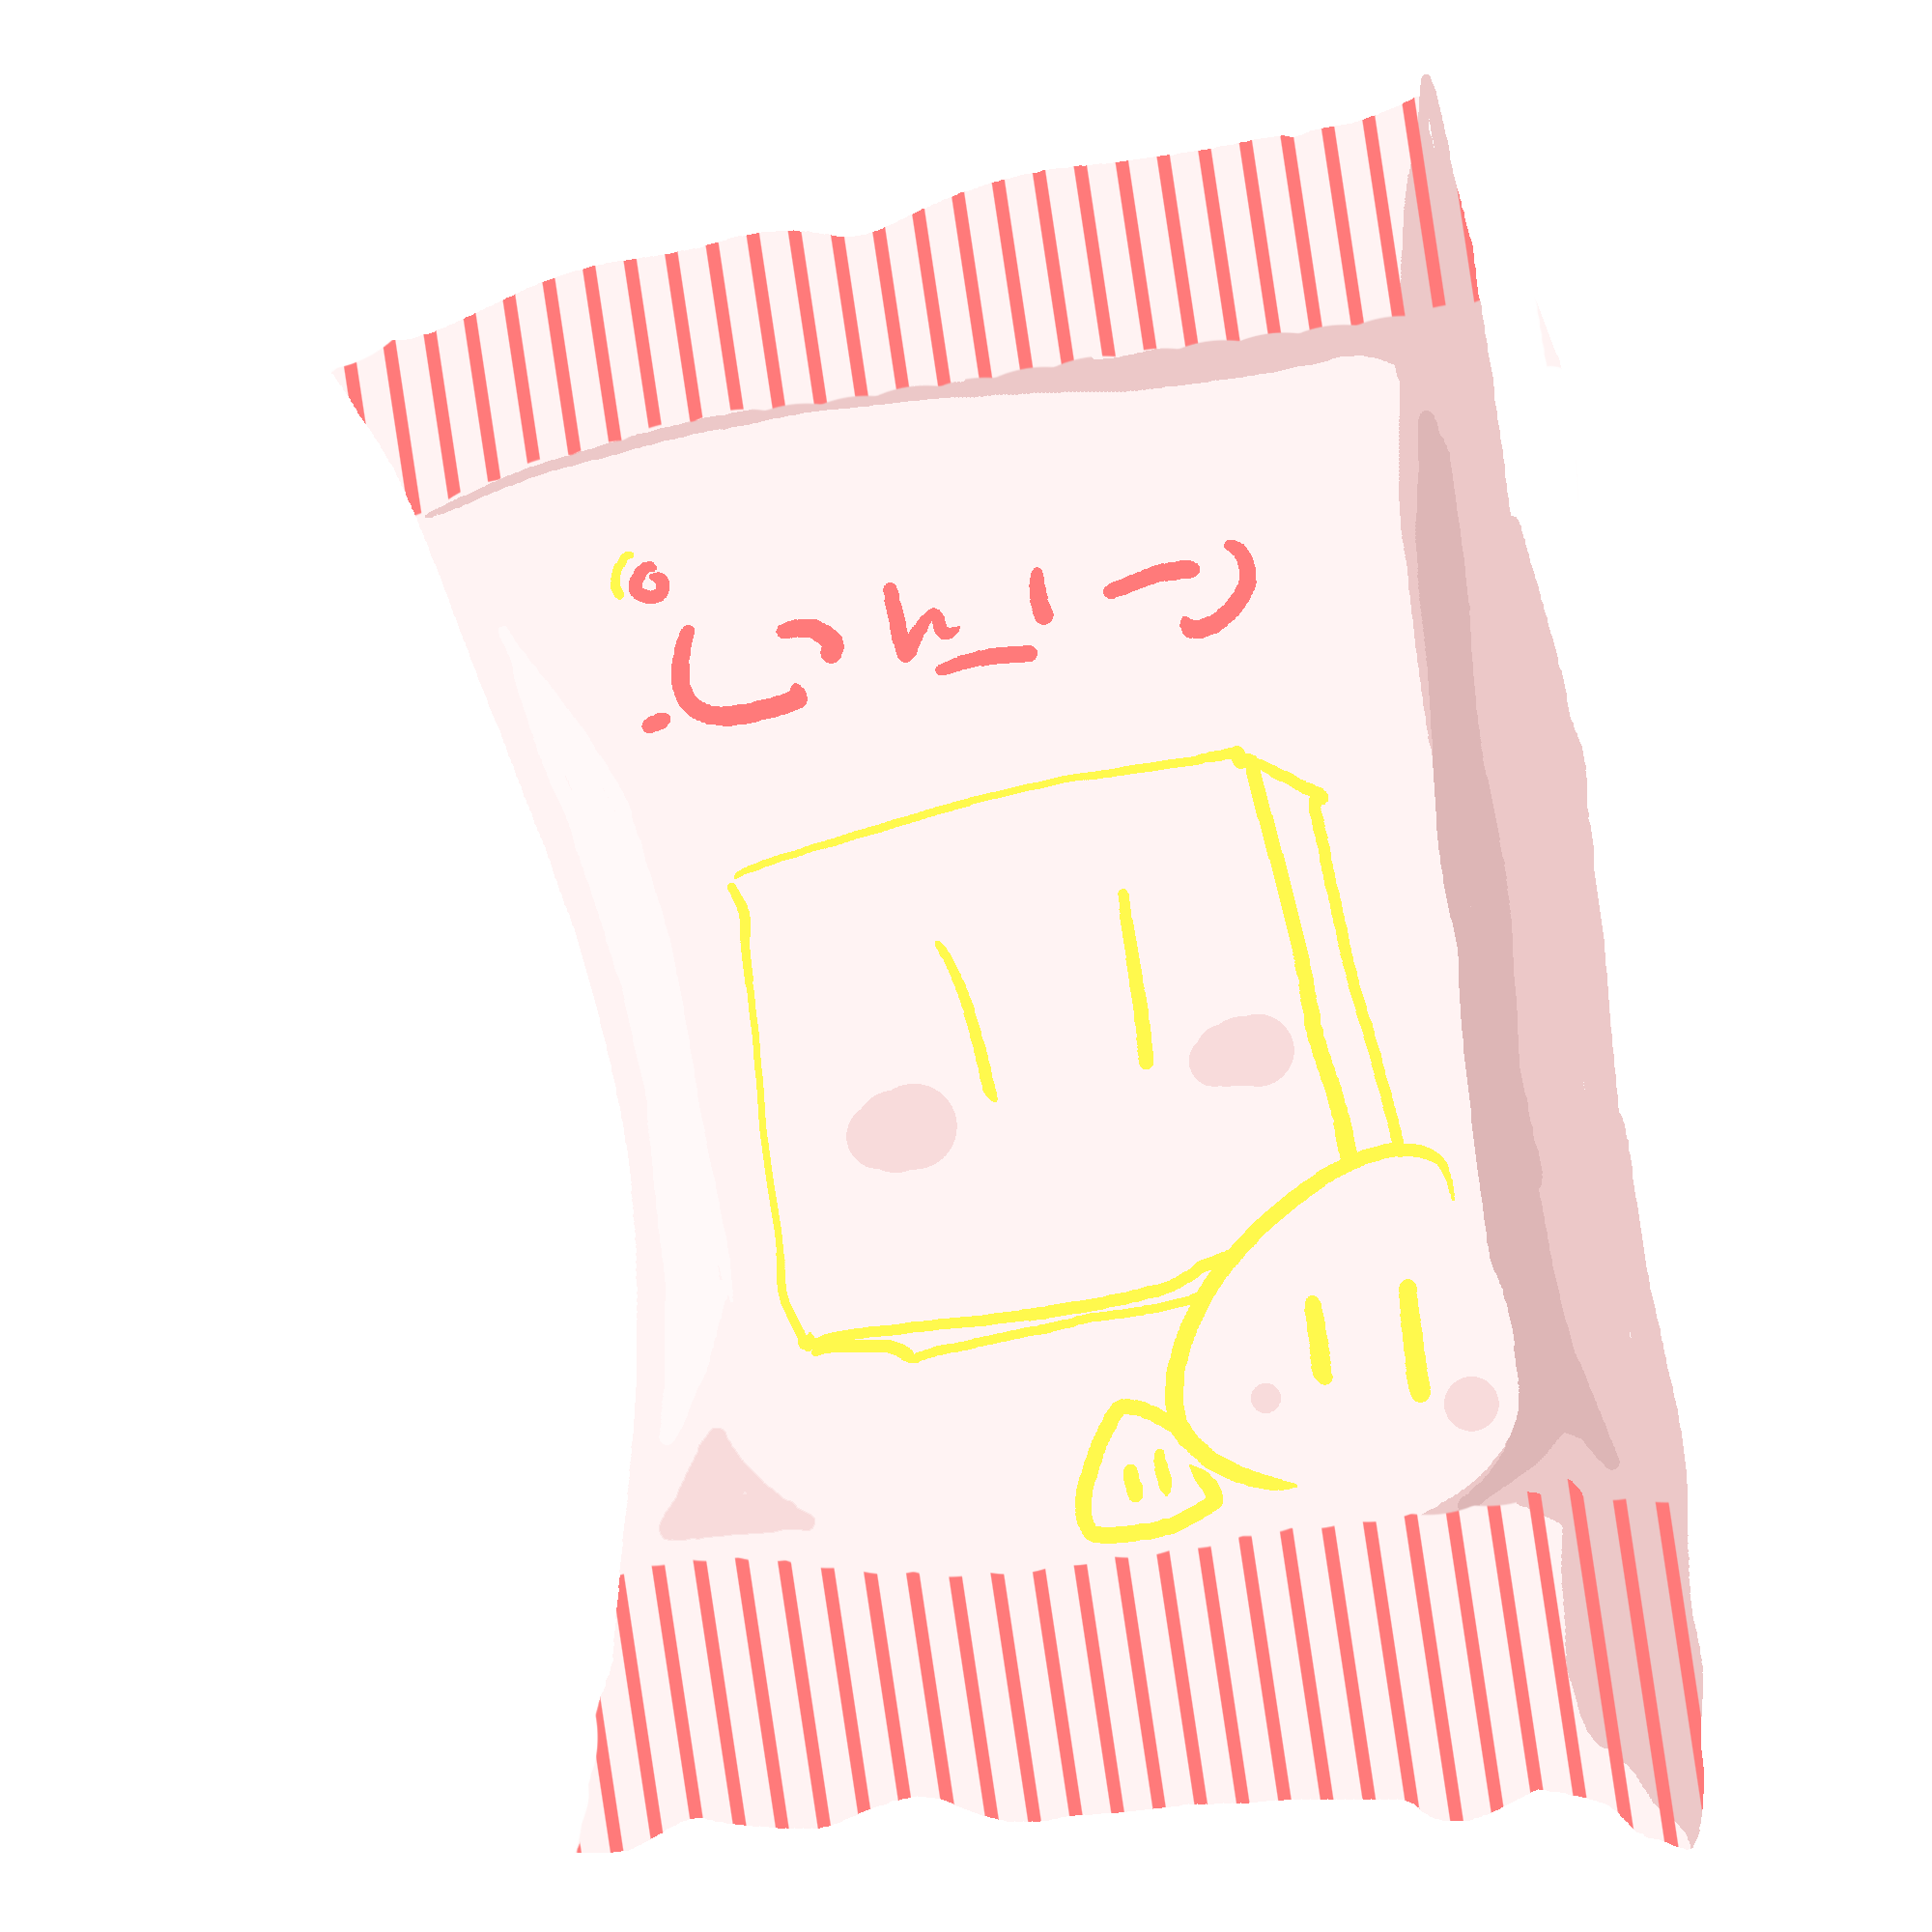 |
| Social Influence | Peer Recommendations | 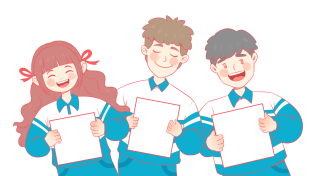 | Family Consumption Habits | 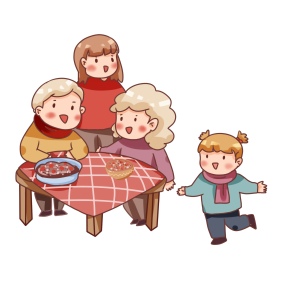 |
| Which option would you be more willing to choose | SnackA □ | | SnackB □ | |
| Considering your daily diet, would you consume this snack in real life?  Yes□ No□ | | | | |

Choice Set 6/8

| Snack Attributes | Snack A | | Snack B | |
| --- | --- | --- | --- | --- |
| Taste | Savory  Flavor | 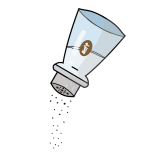 | Sweet  Flavor | 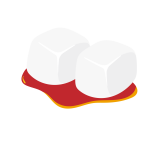 |
| Nutrient Claims | None | 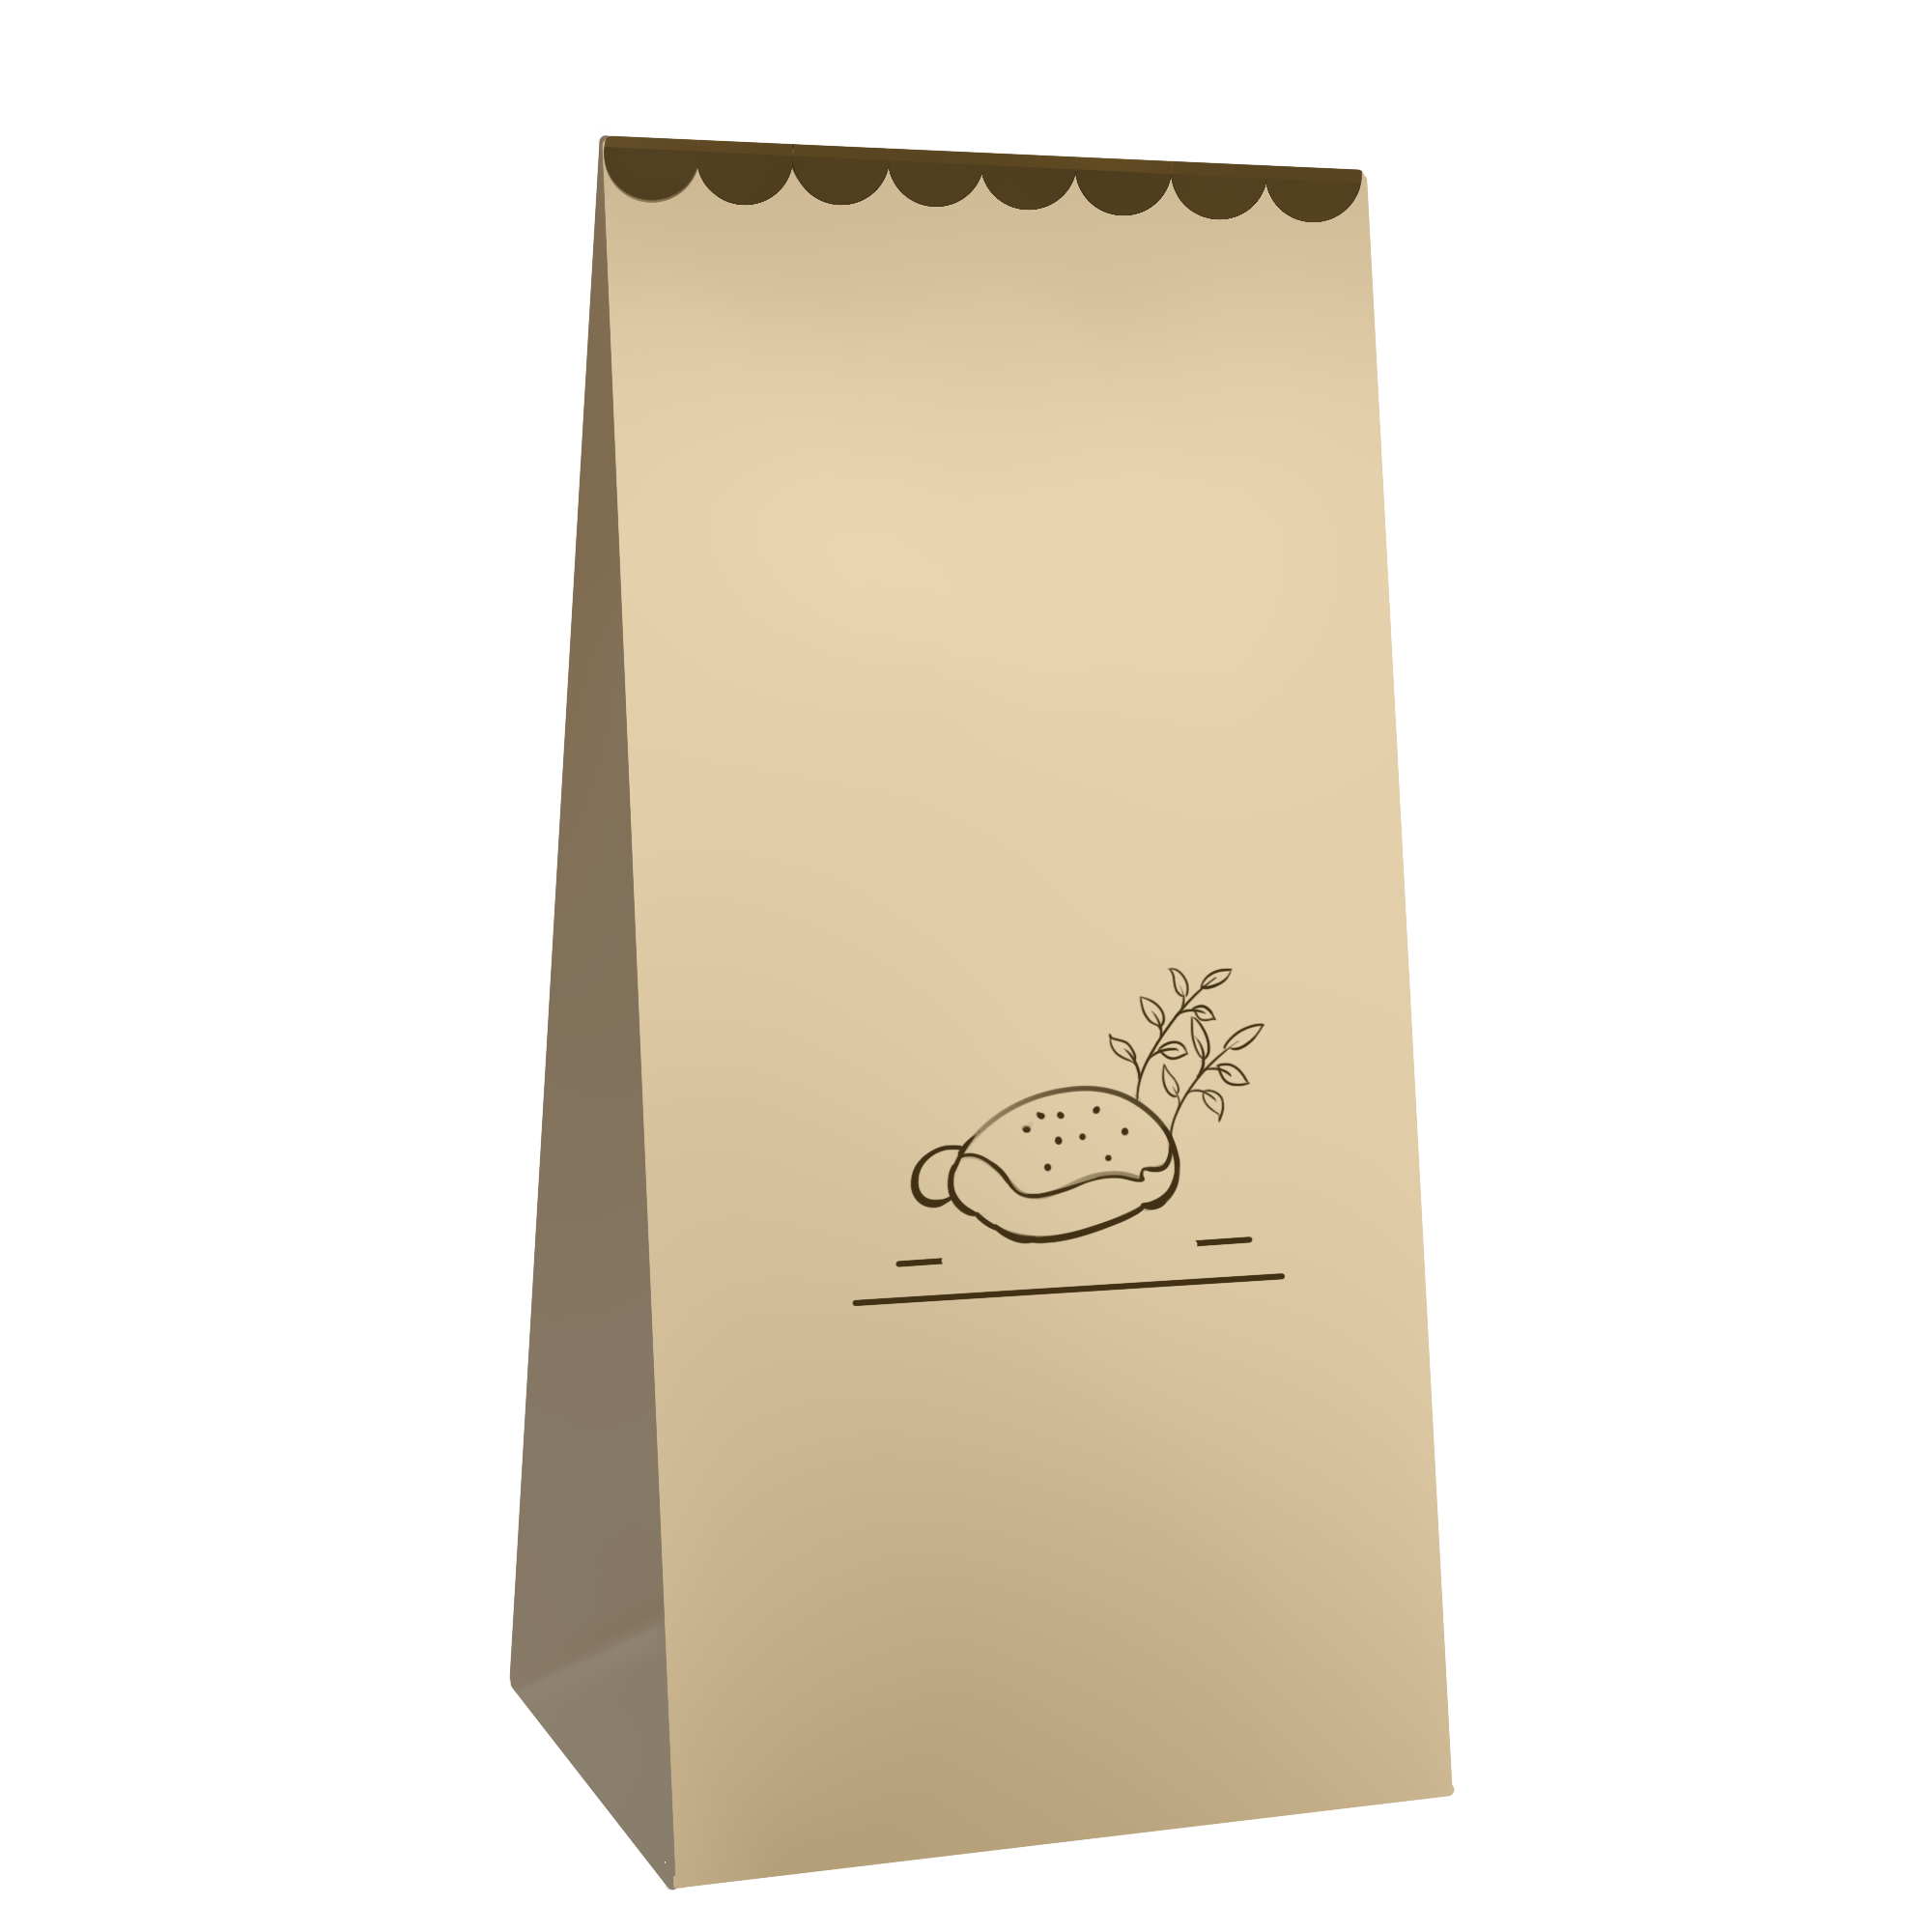 | Rich Minerals / Vitamins | 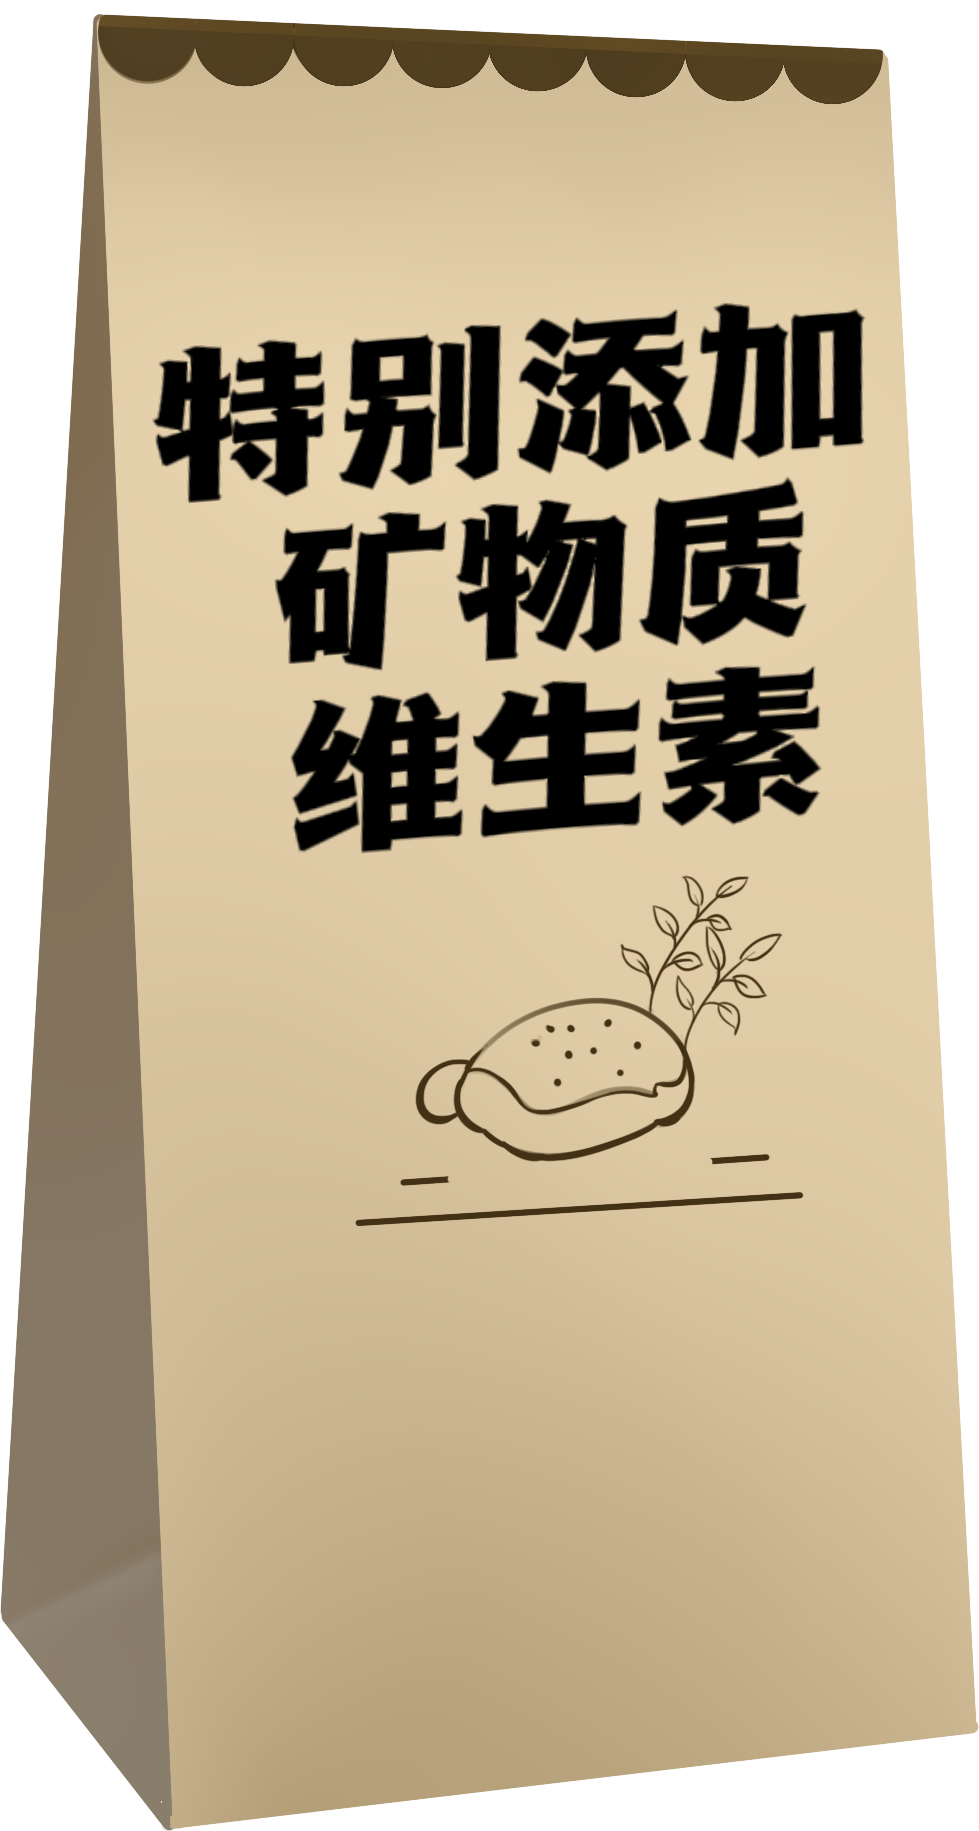 |
| Purchase Location | Supermarket/ Hypermarket | 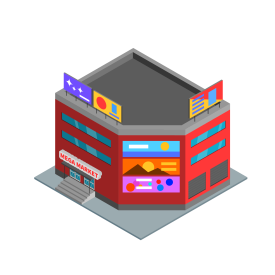 | Near School | 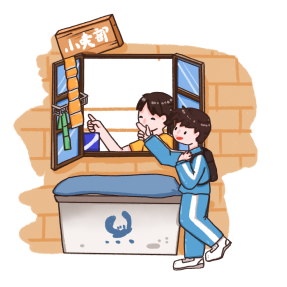 |
| Price | <5 ¥CNY | 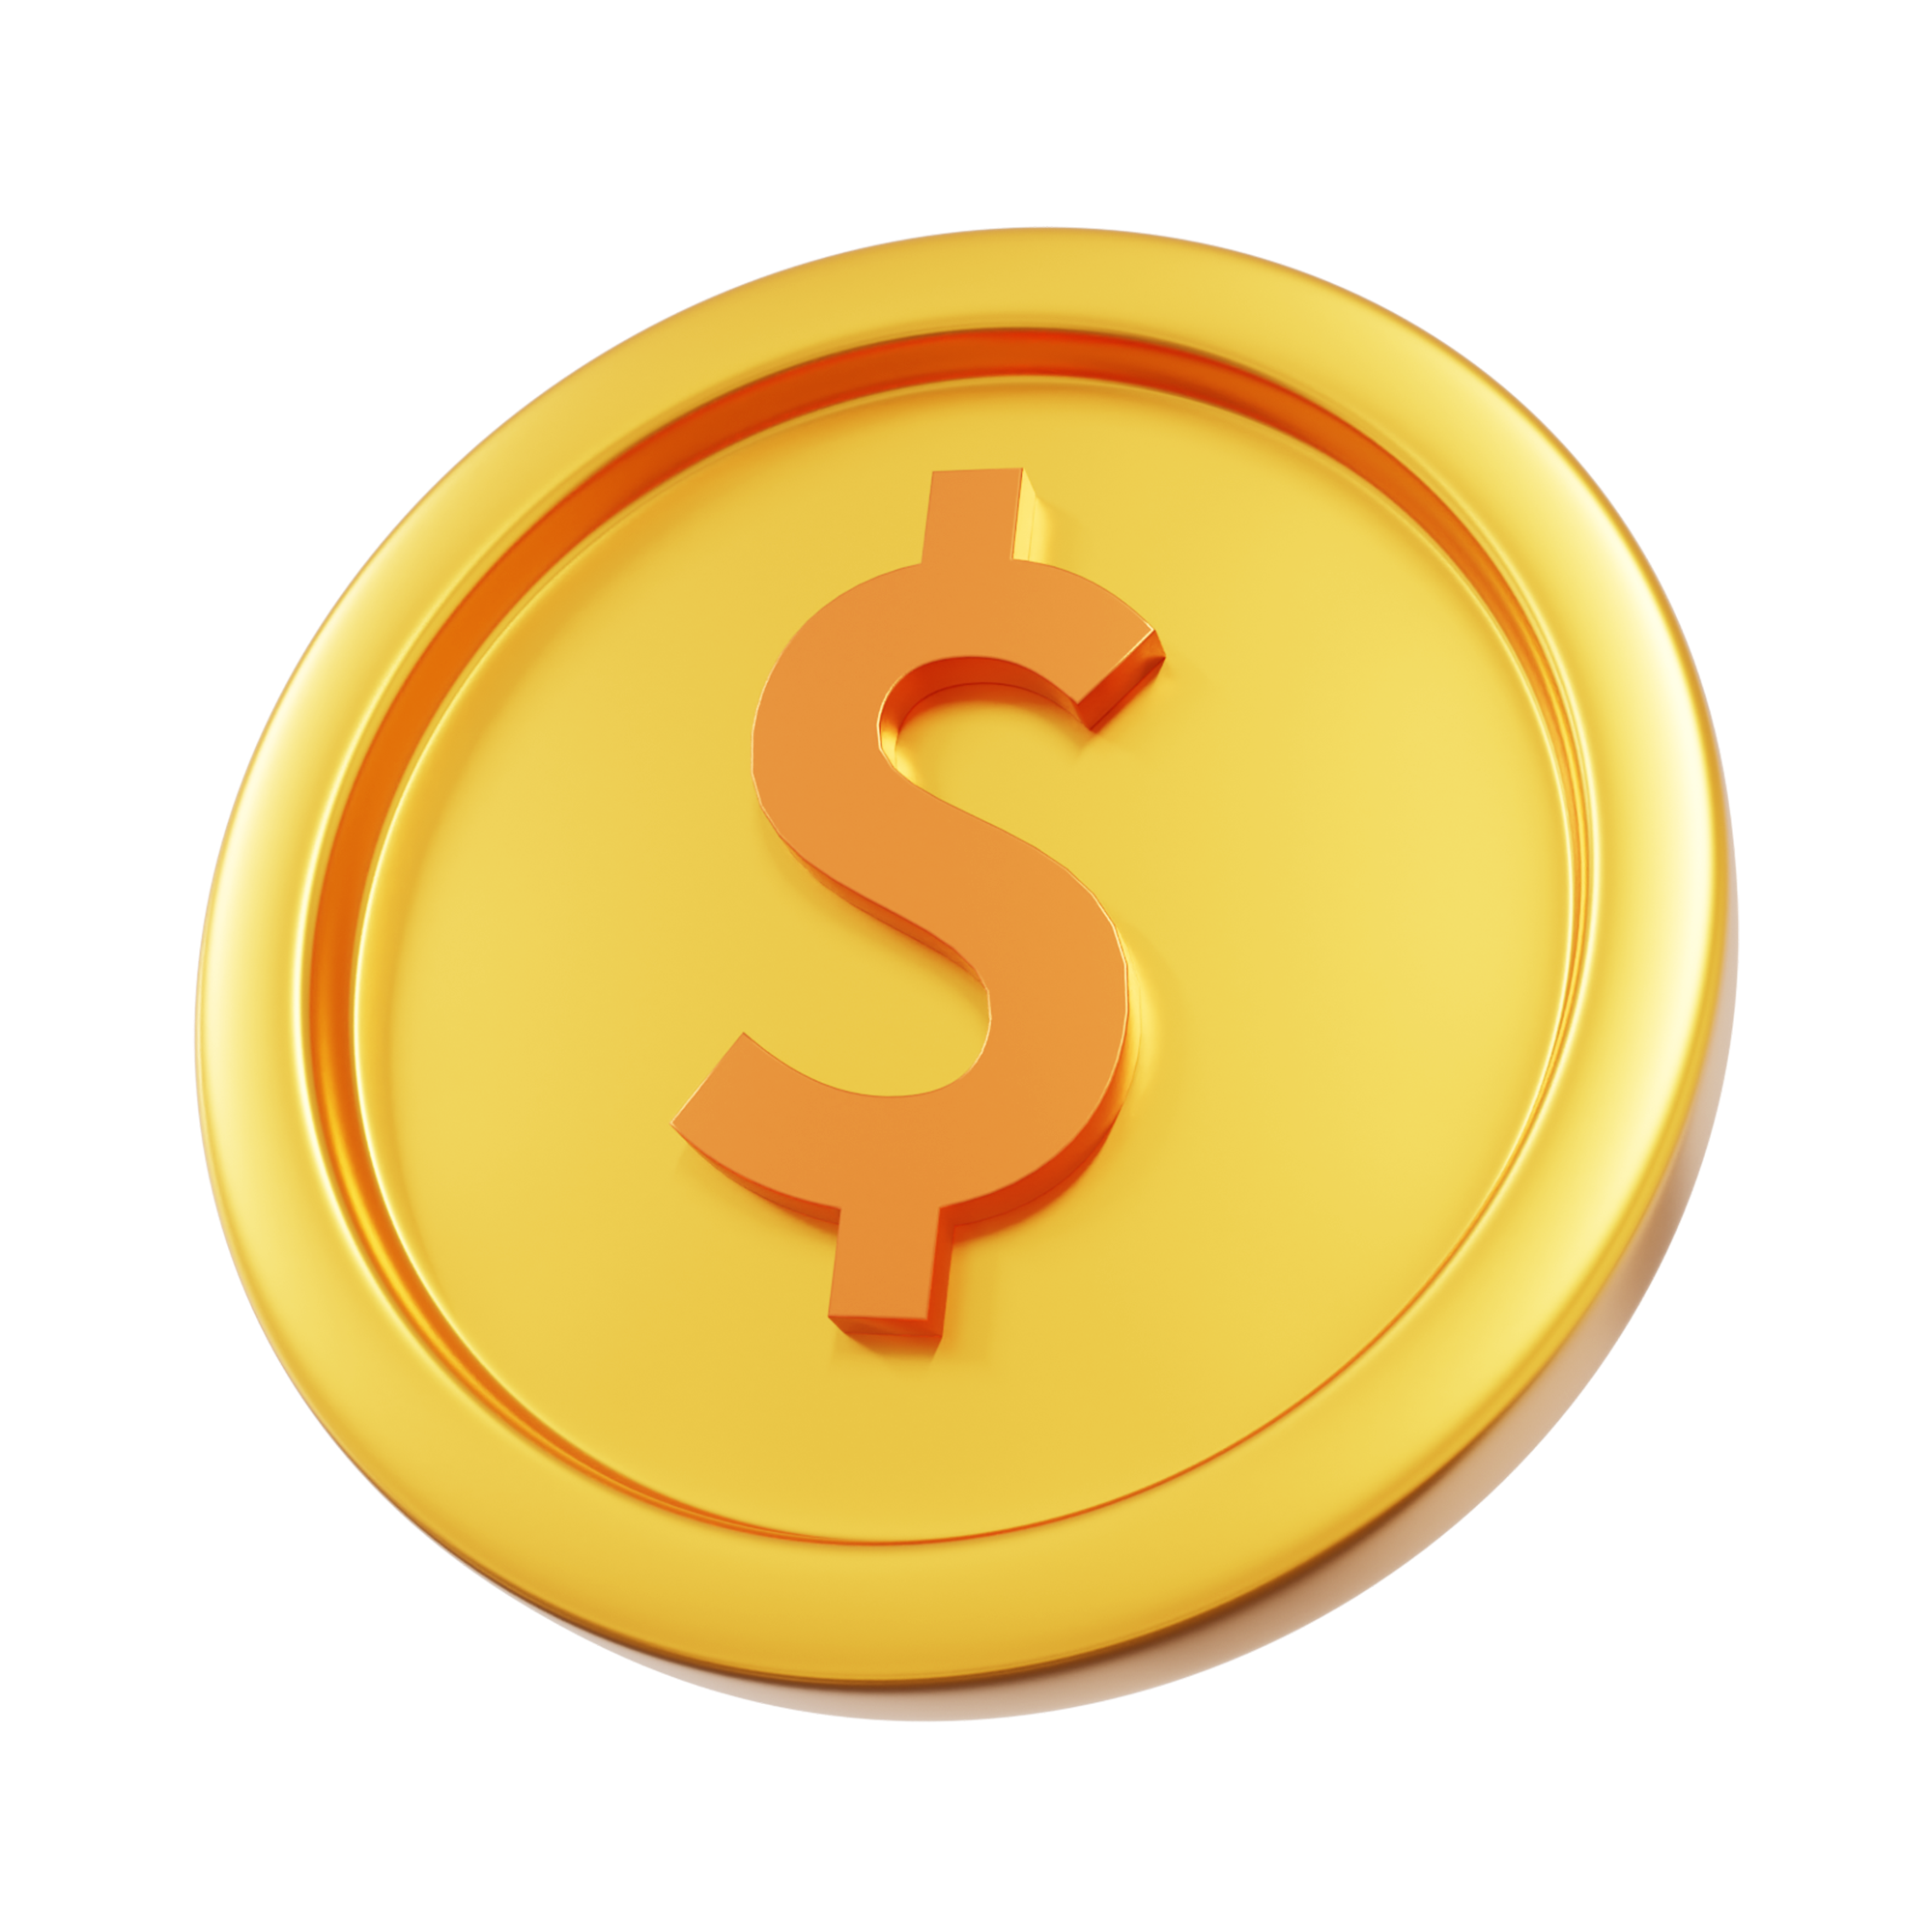 | ≥10 ¥CNY | 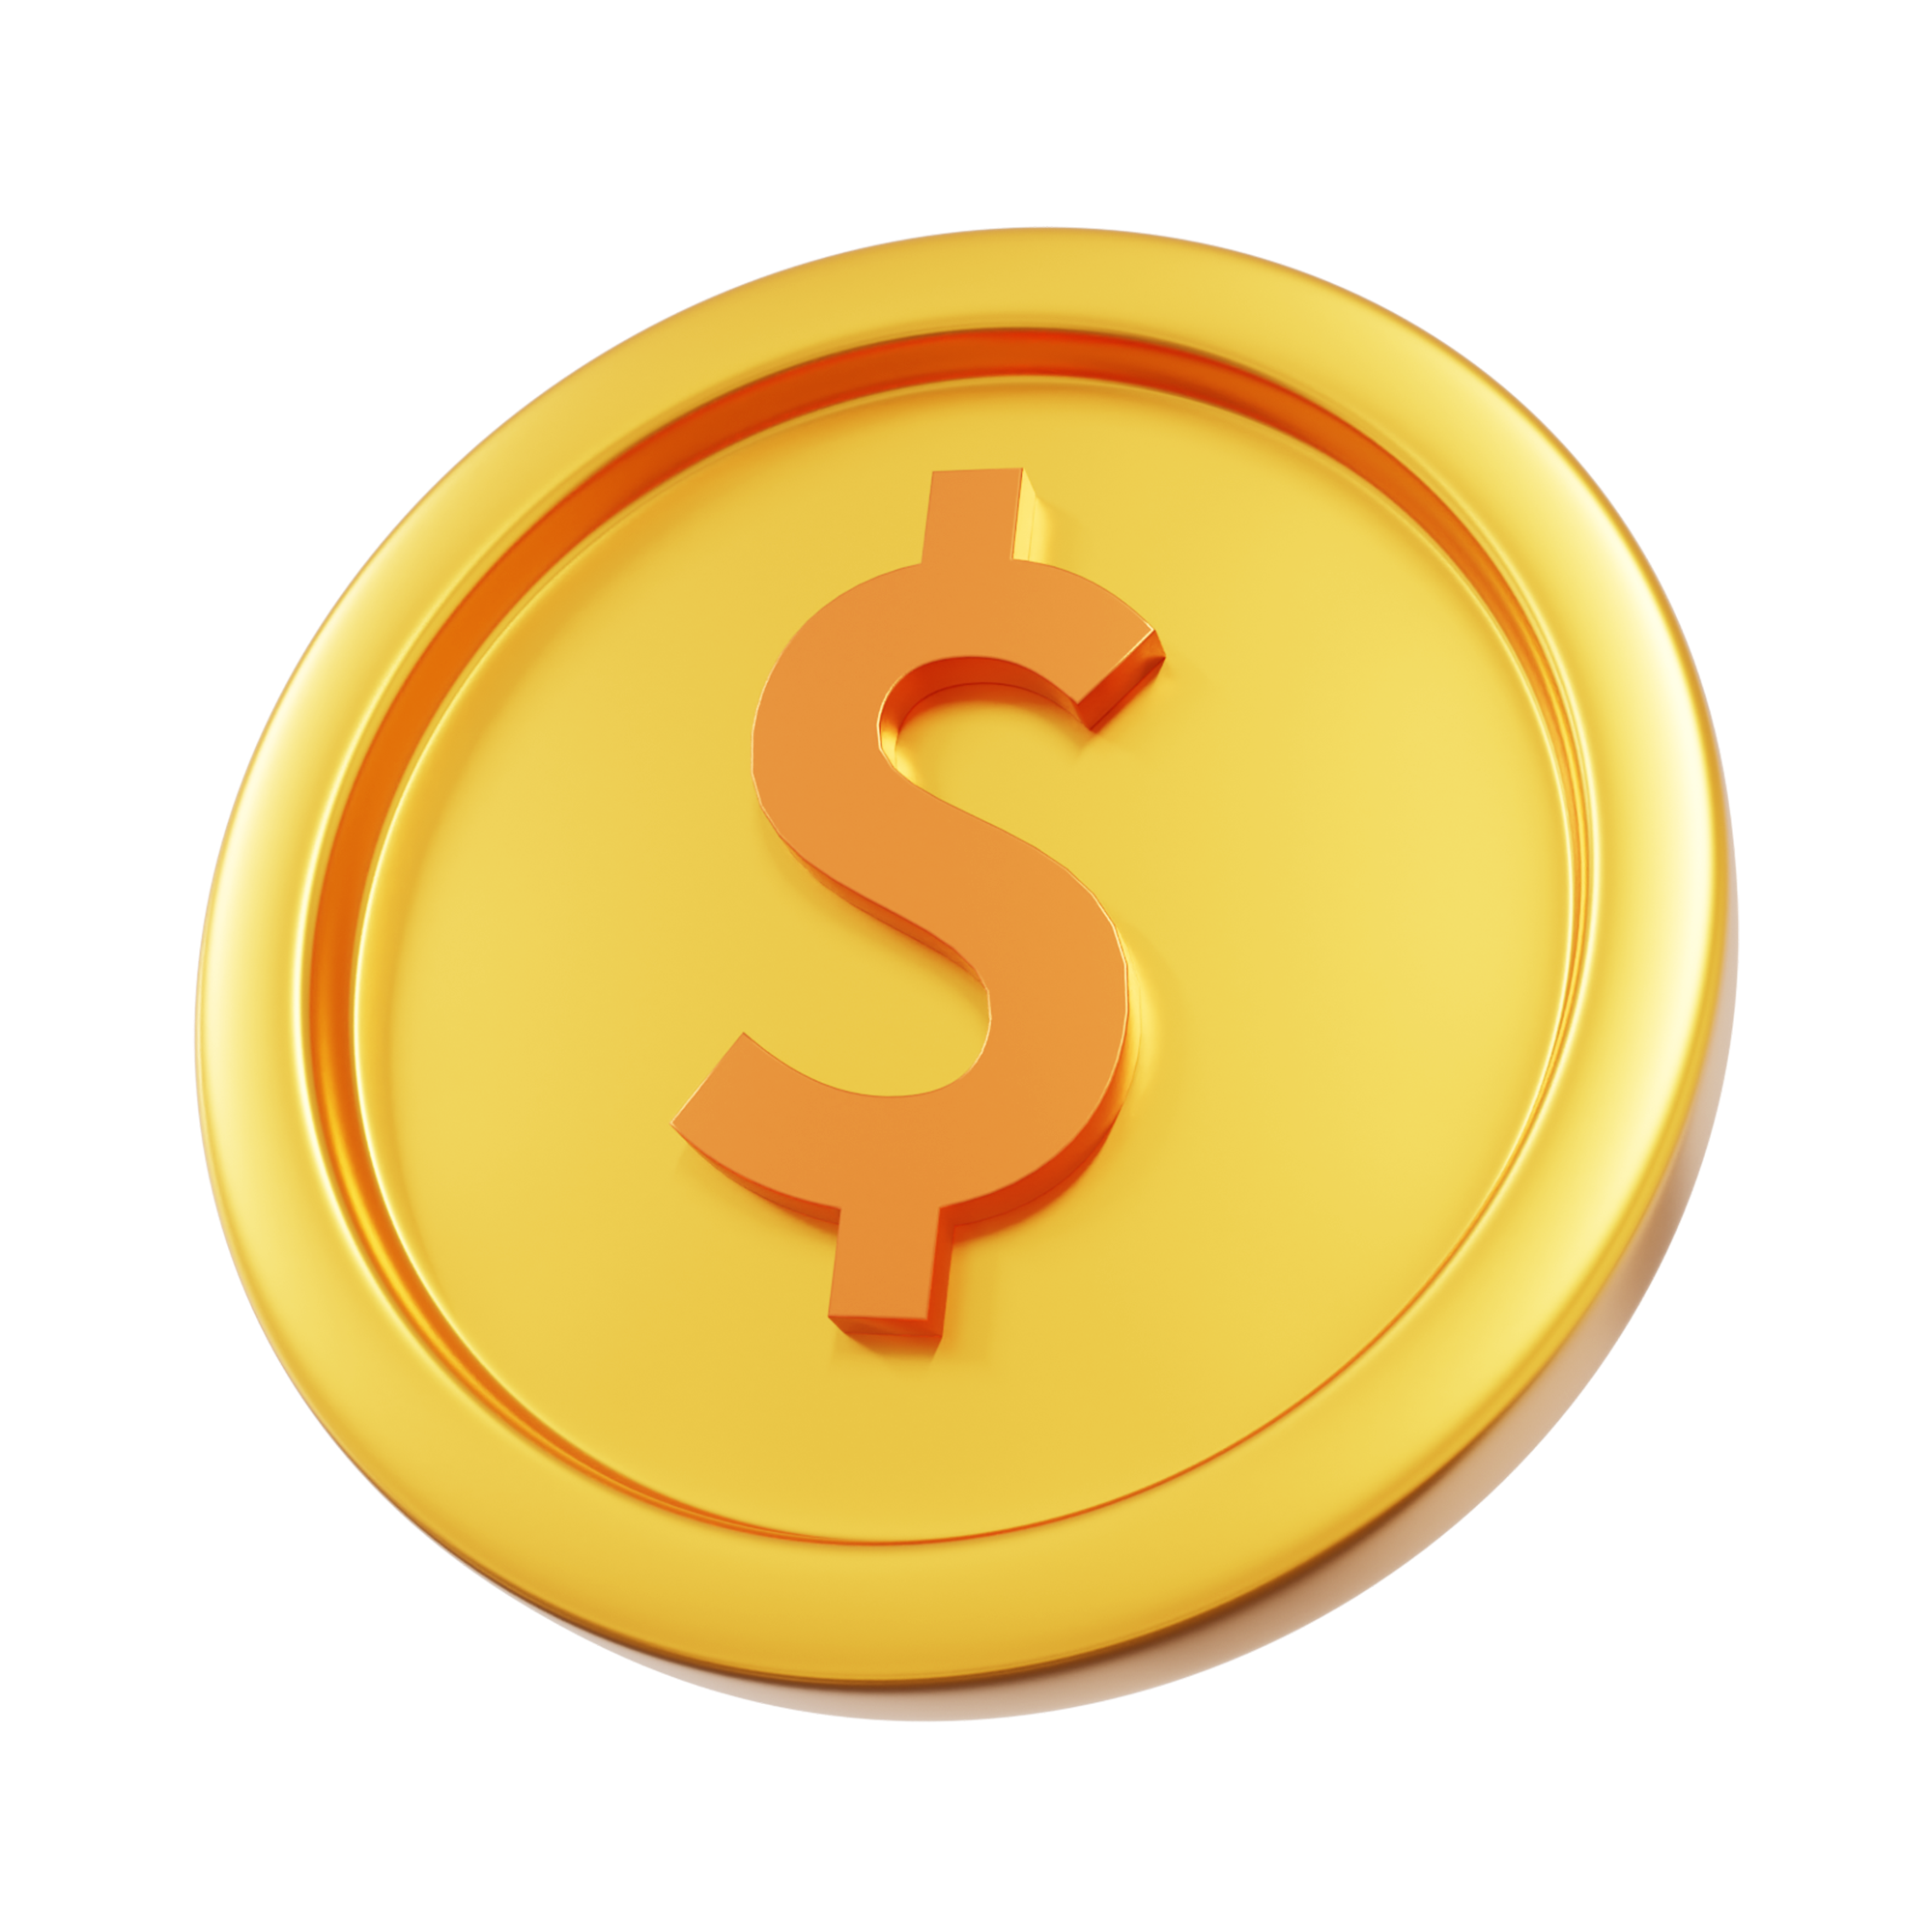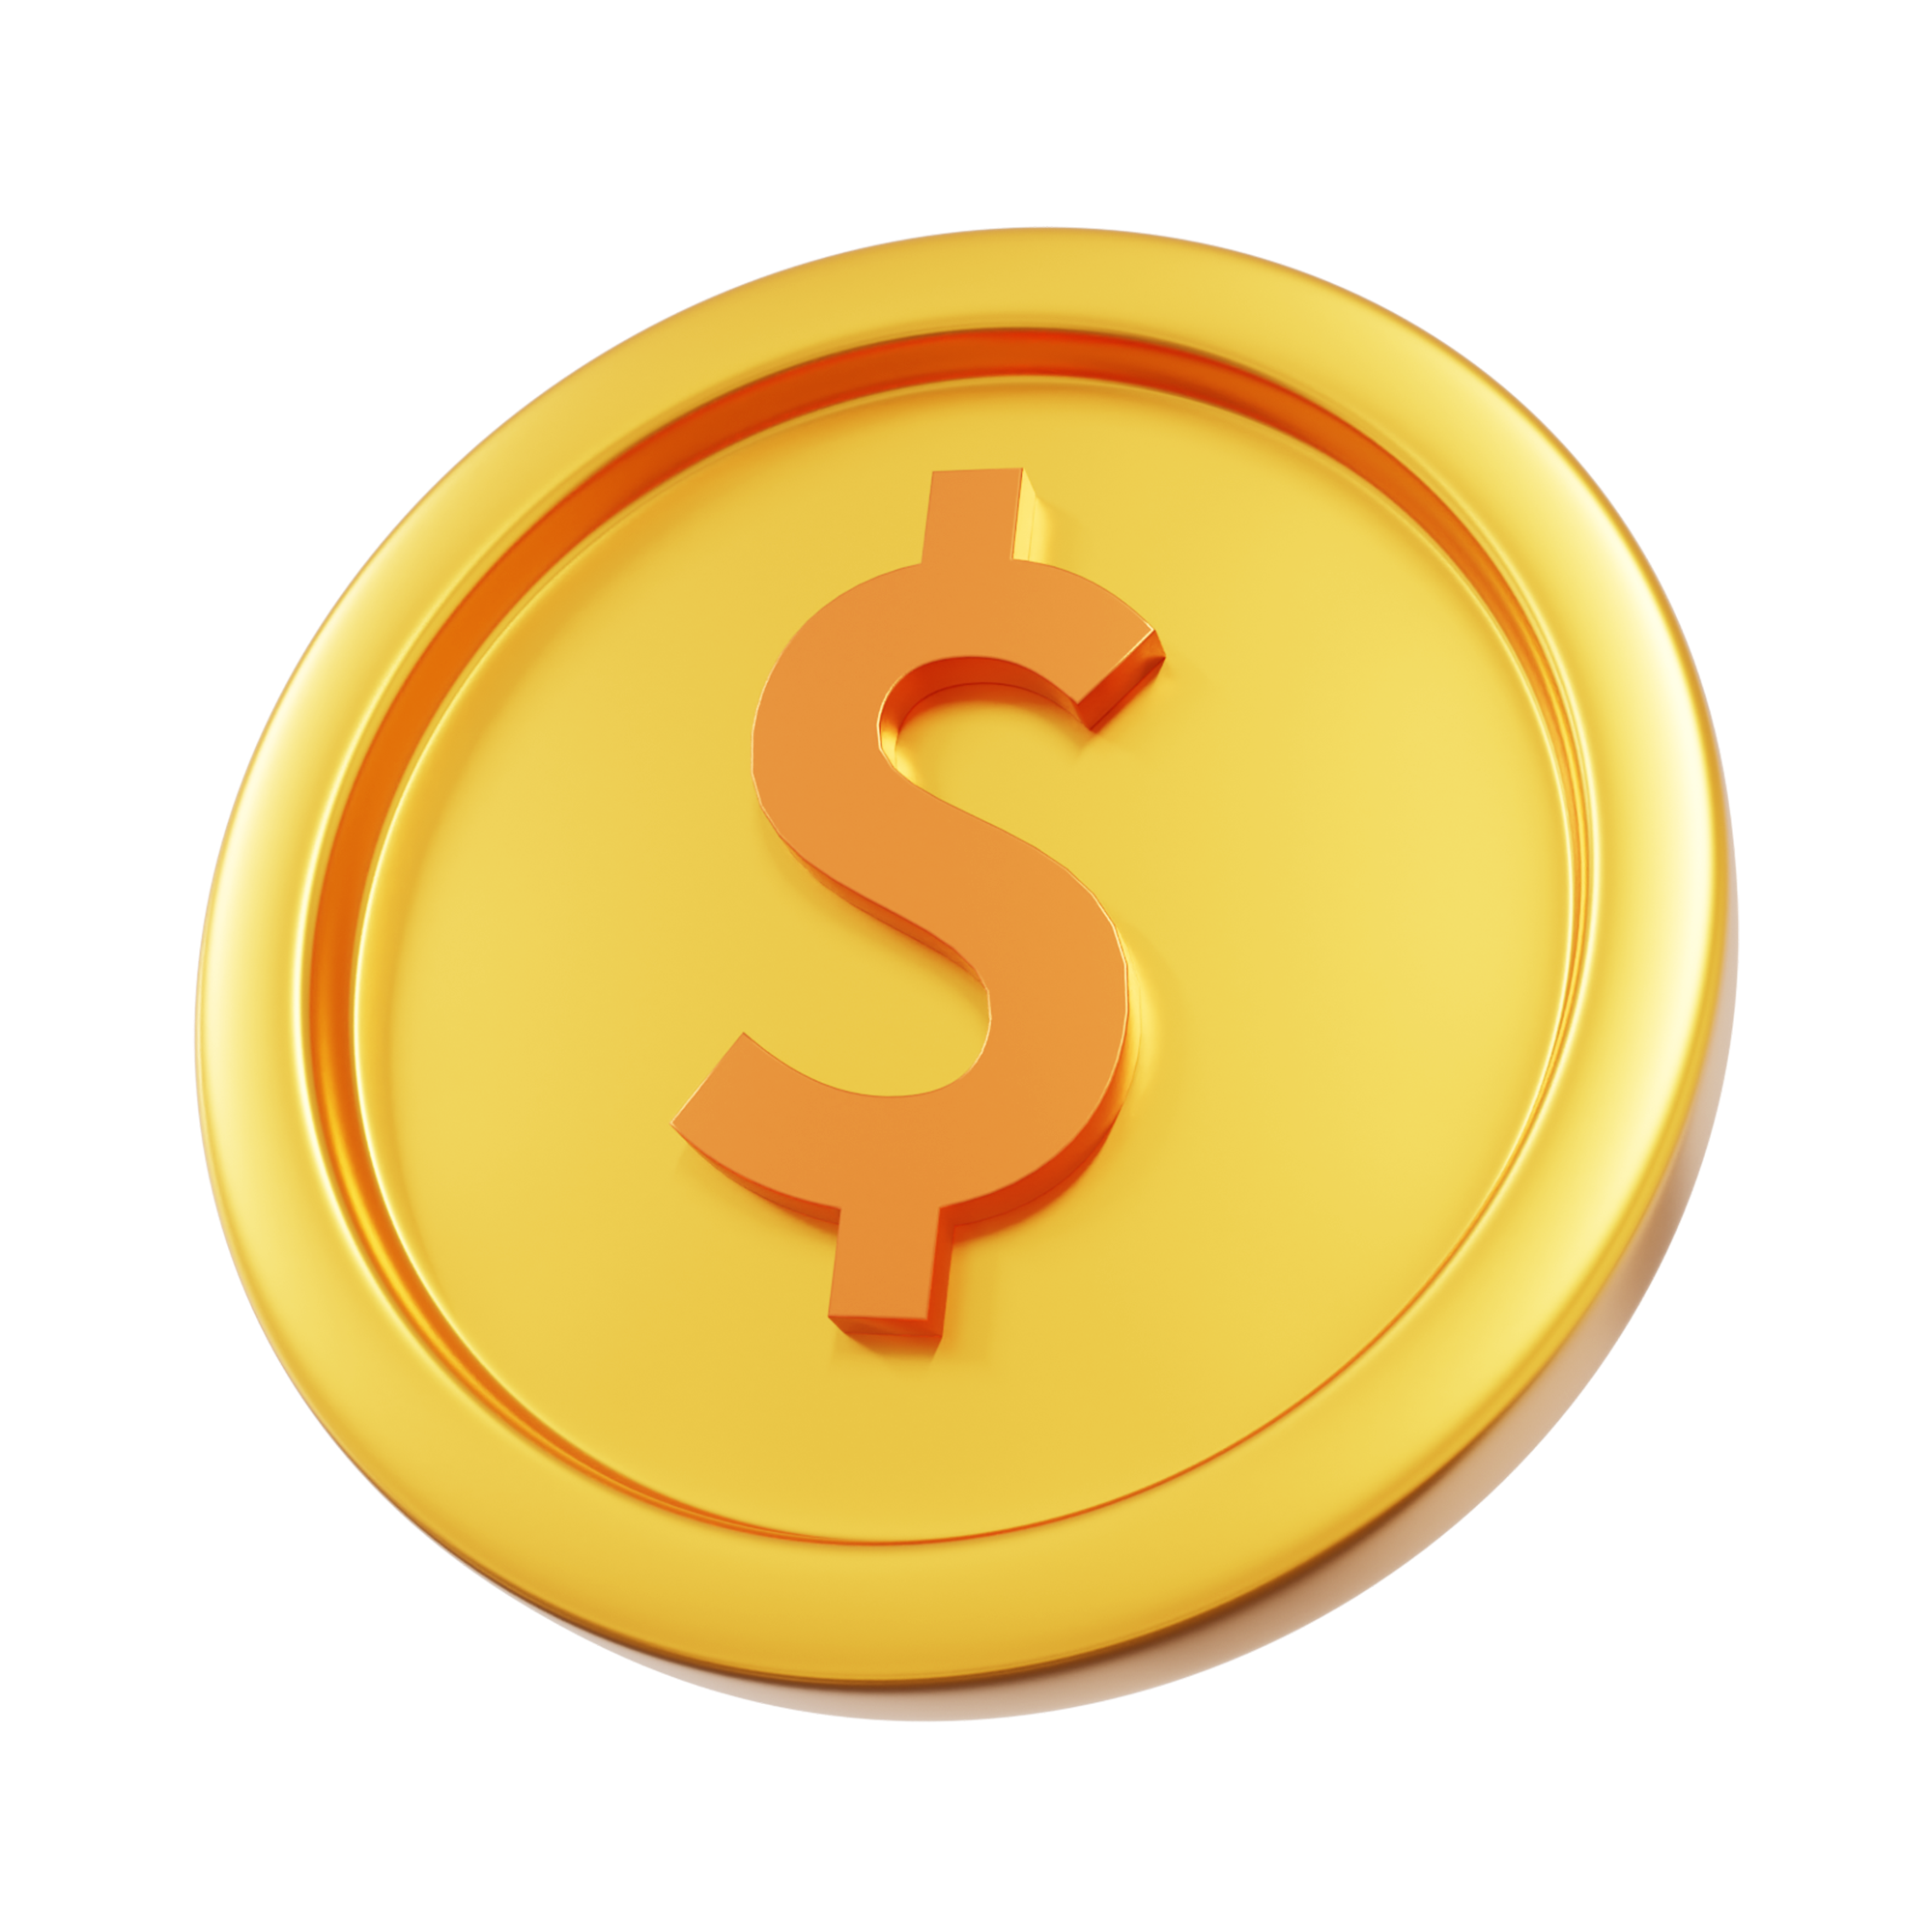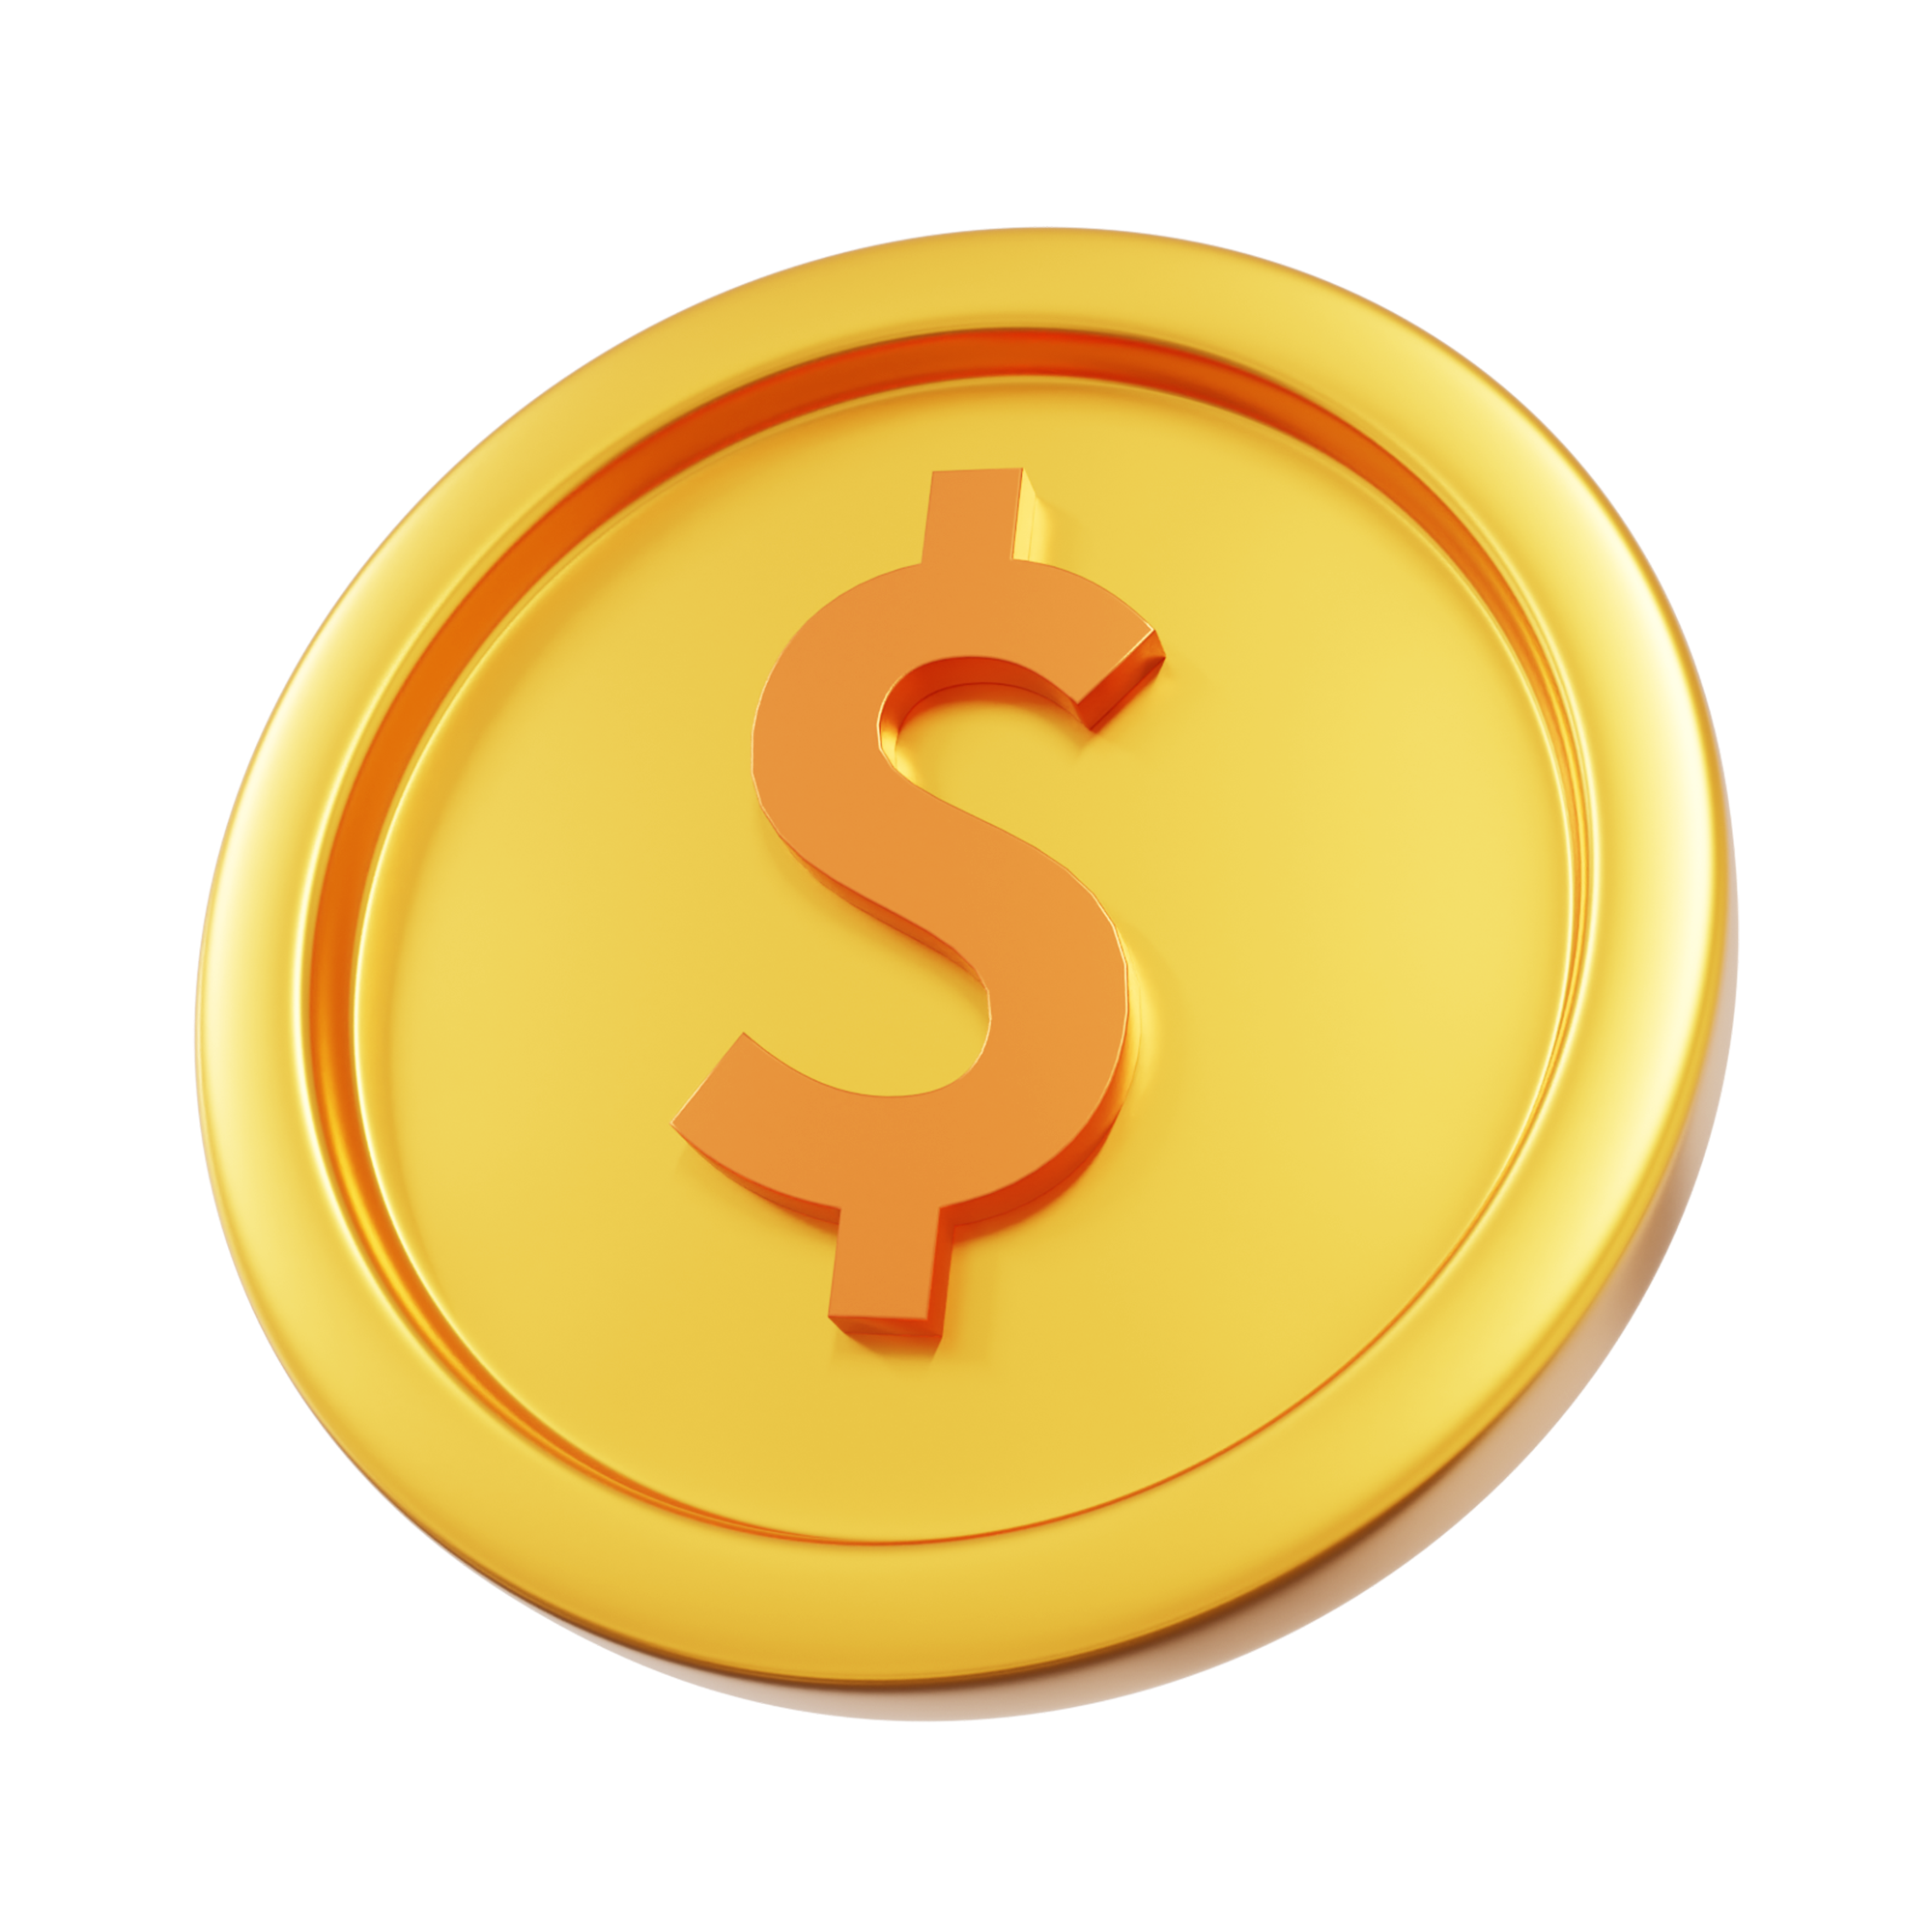 |
| Package Size | Medium | 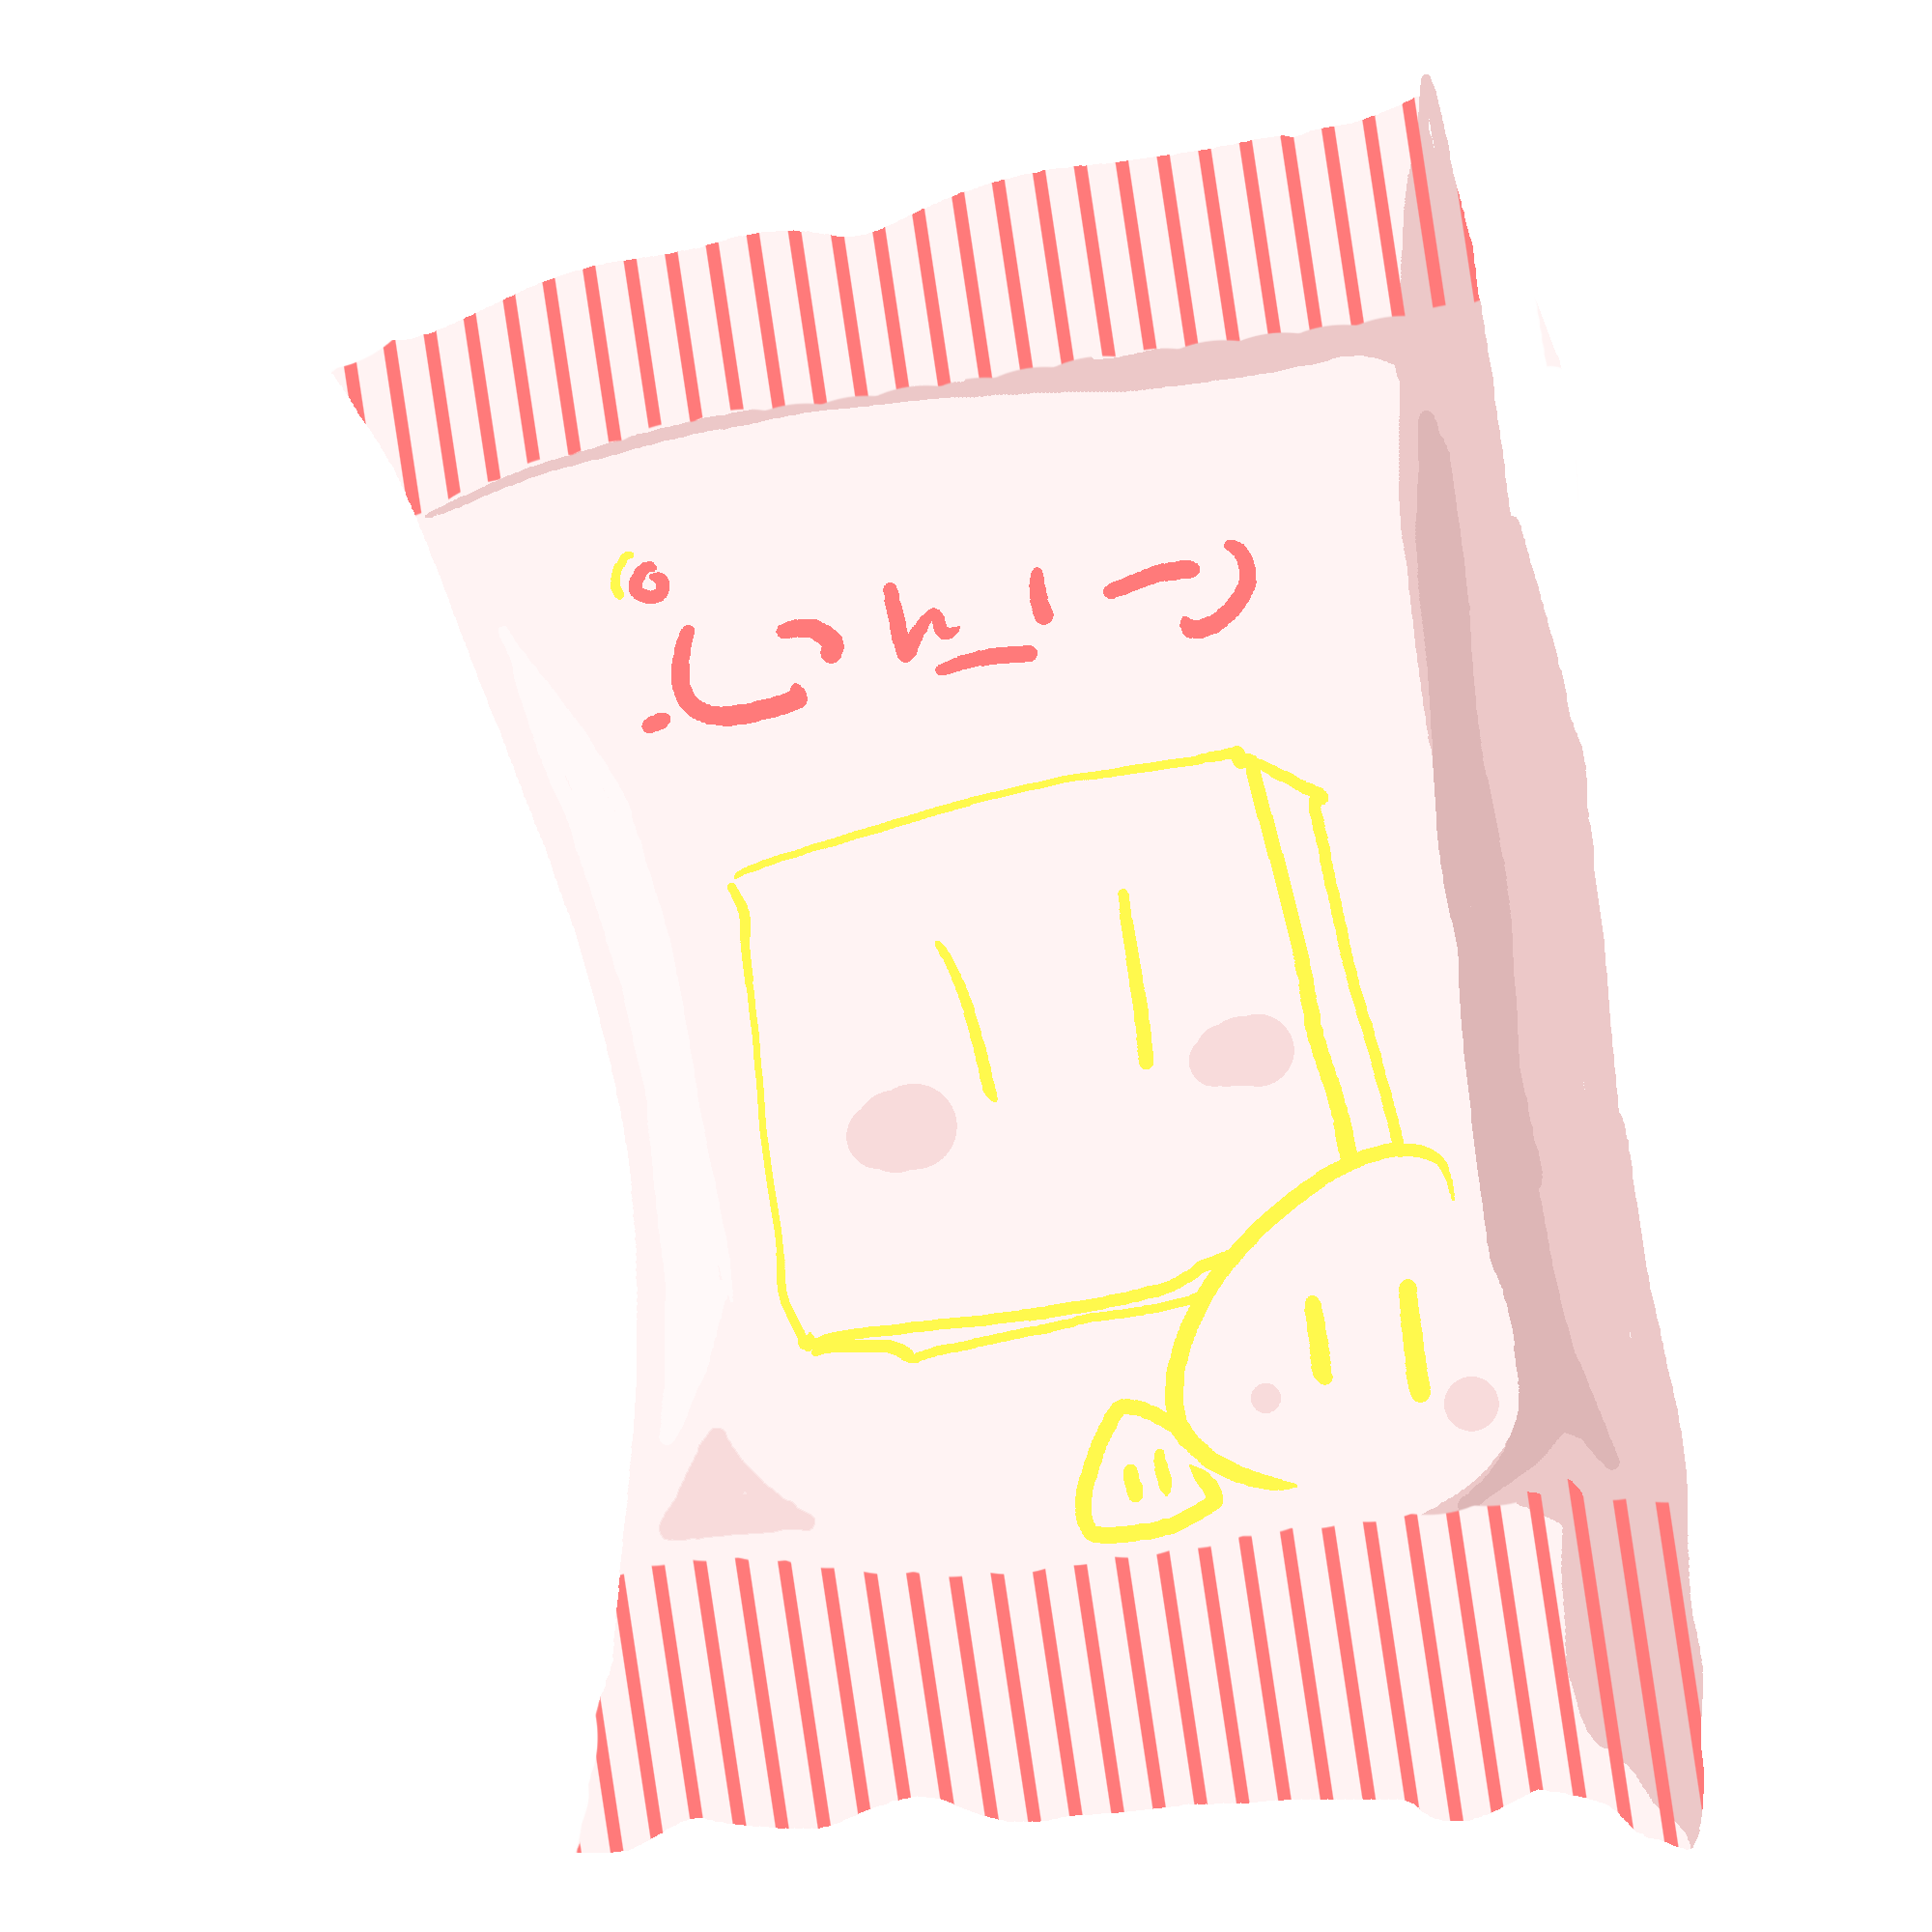 | Large | 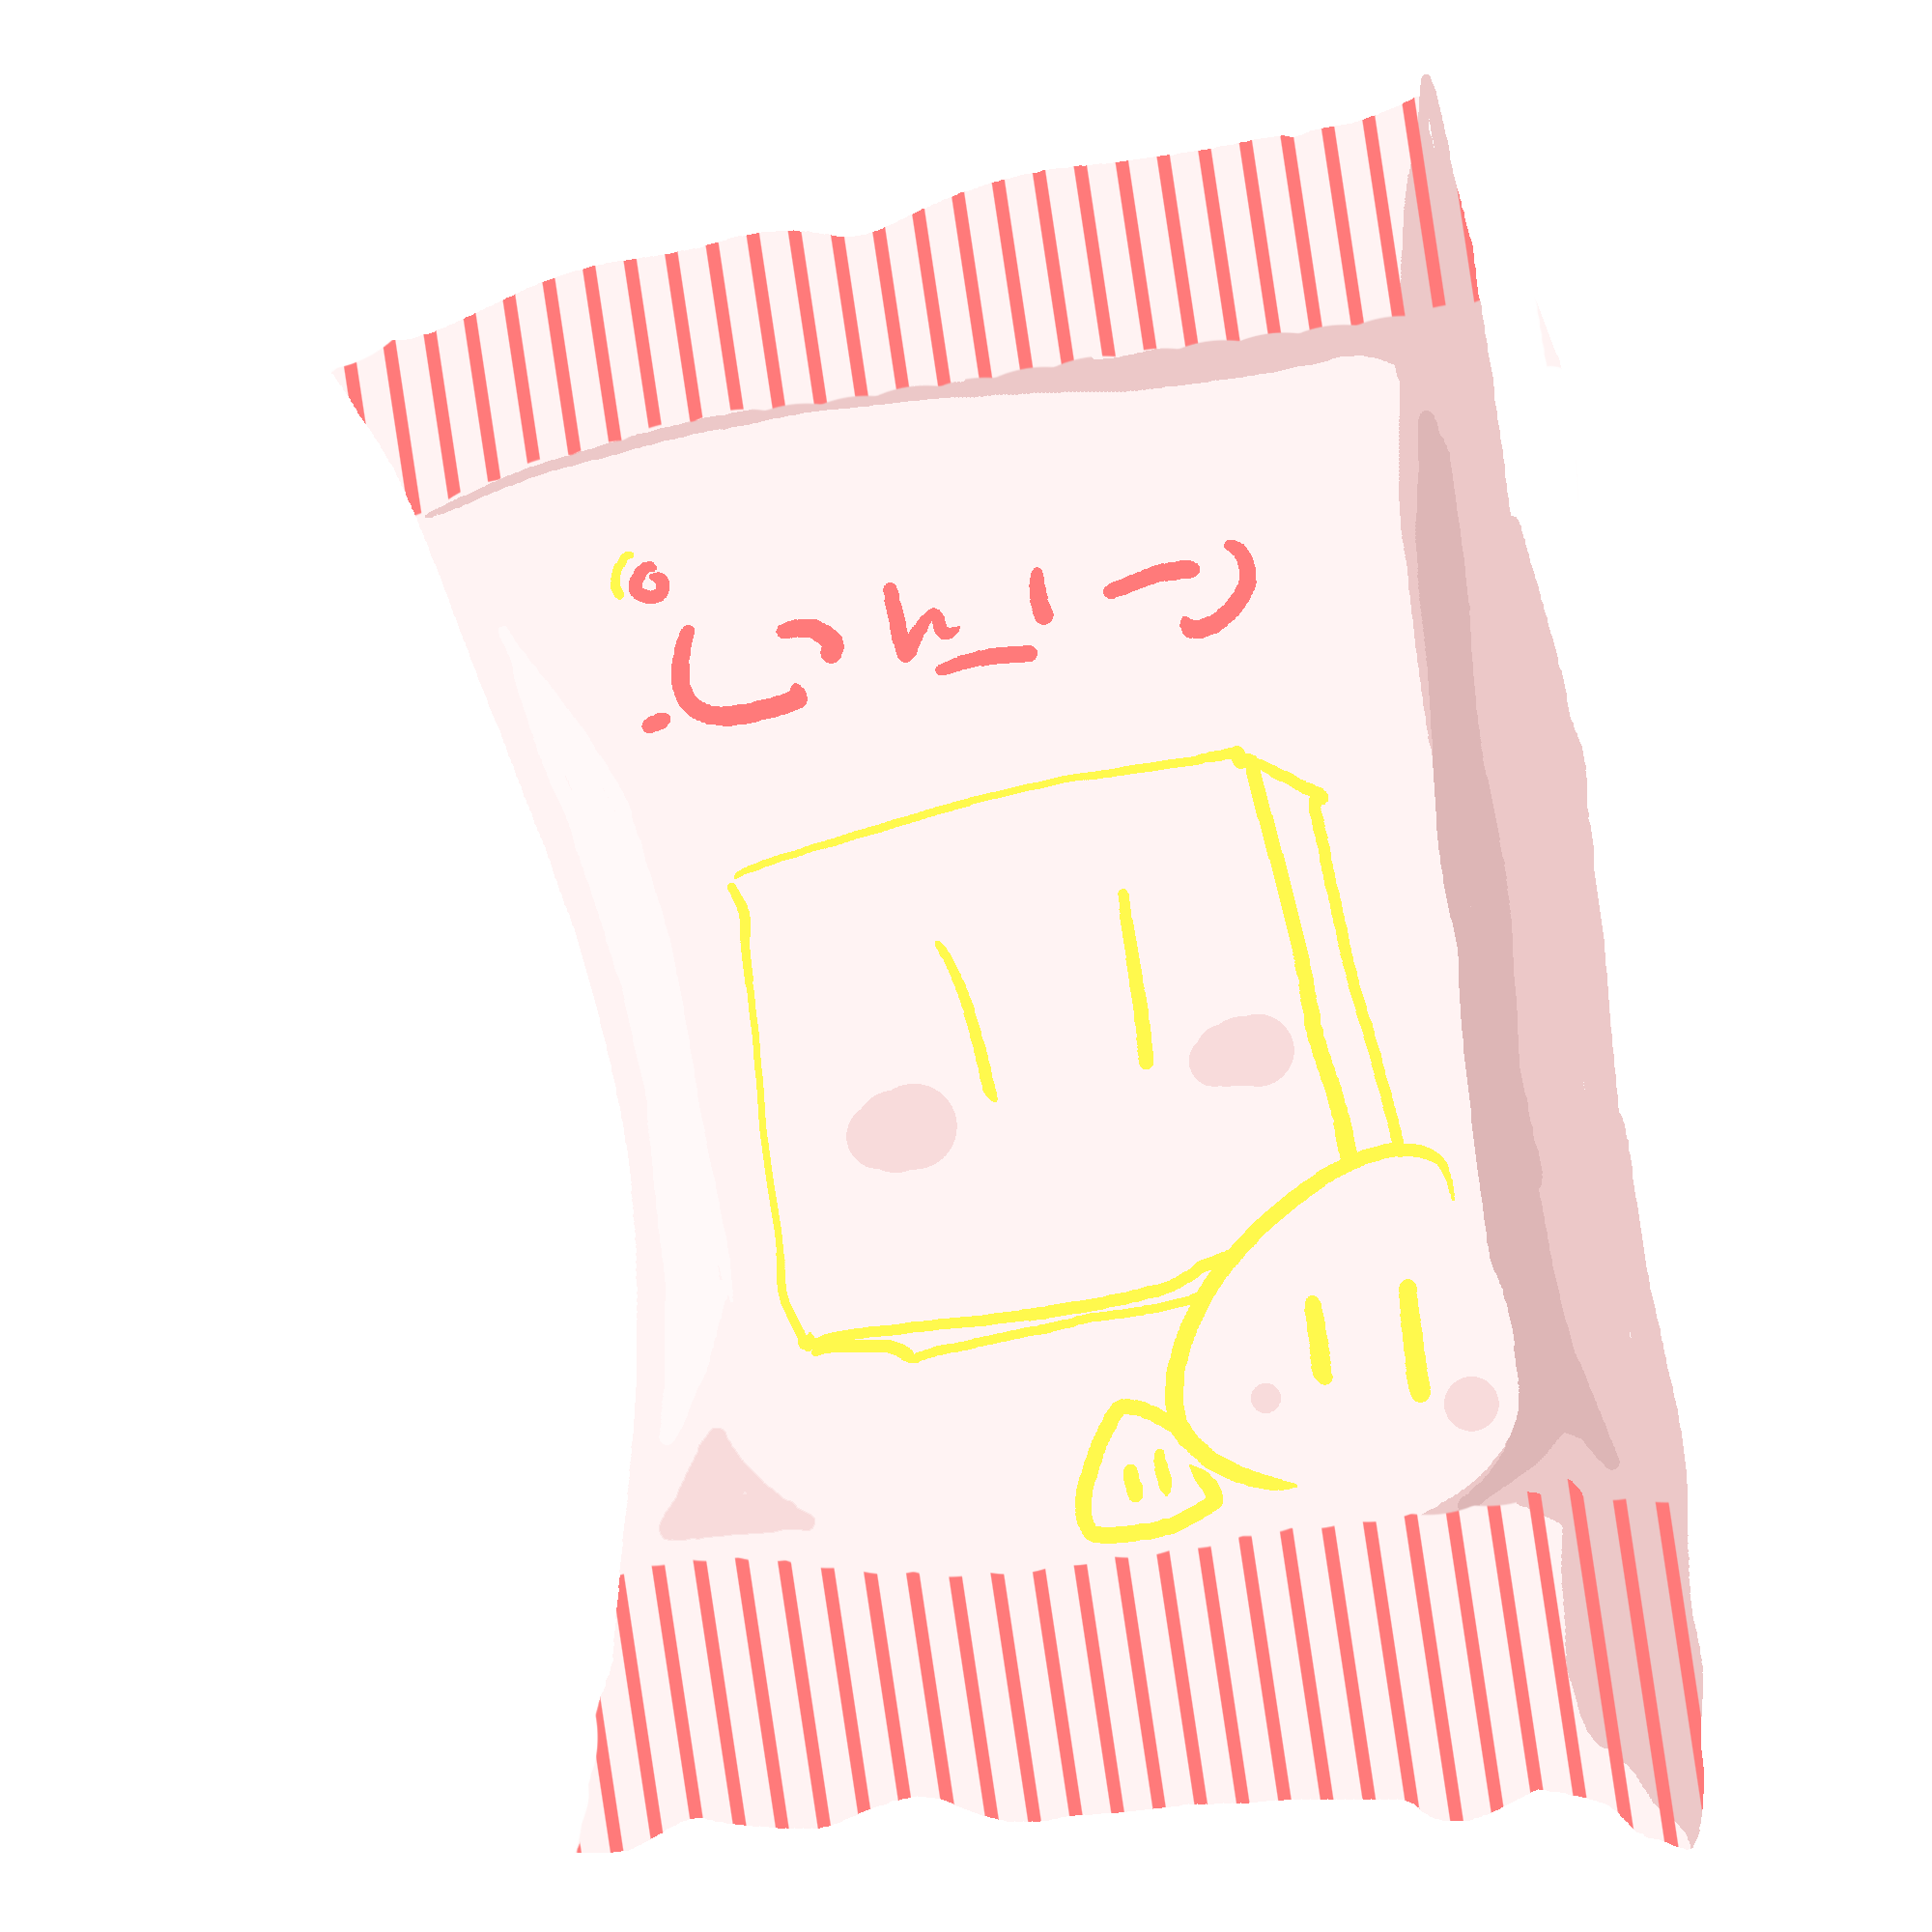 |
| Social Influence | Advertising/ Influencer Recommendations | 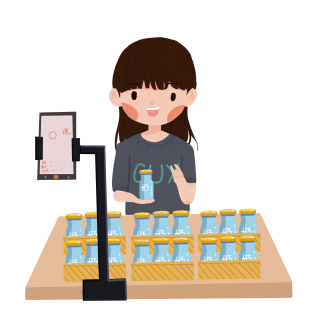 | Family Consumption Habits | 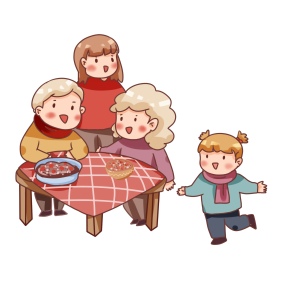 |
| Which option would you be more willing to choose | Snack A □ | | Snack B □ | |
| Considering your daily diet, would you consume this snack in real life?  Yes□ No□ | | | | |

Choice Set 7/8

| Snack Attributes | Snack A | | Snack B | |
| --- | --- | --- | --- | --- |
| Taste | Sweet Flavor | 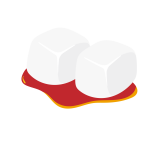 | Original Flavor | 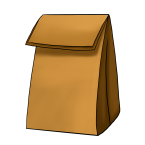 |
| Nutrient Claims | Rich Minerals / Vitamins | 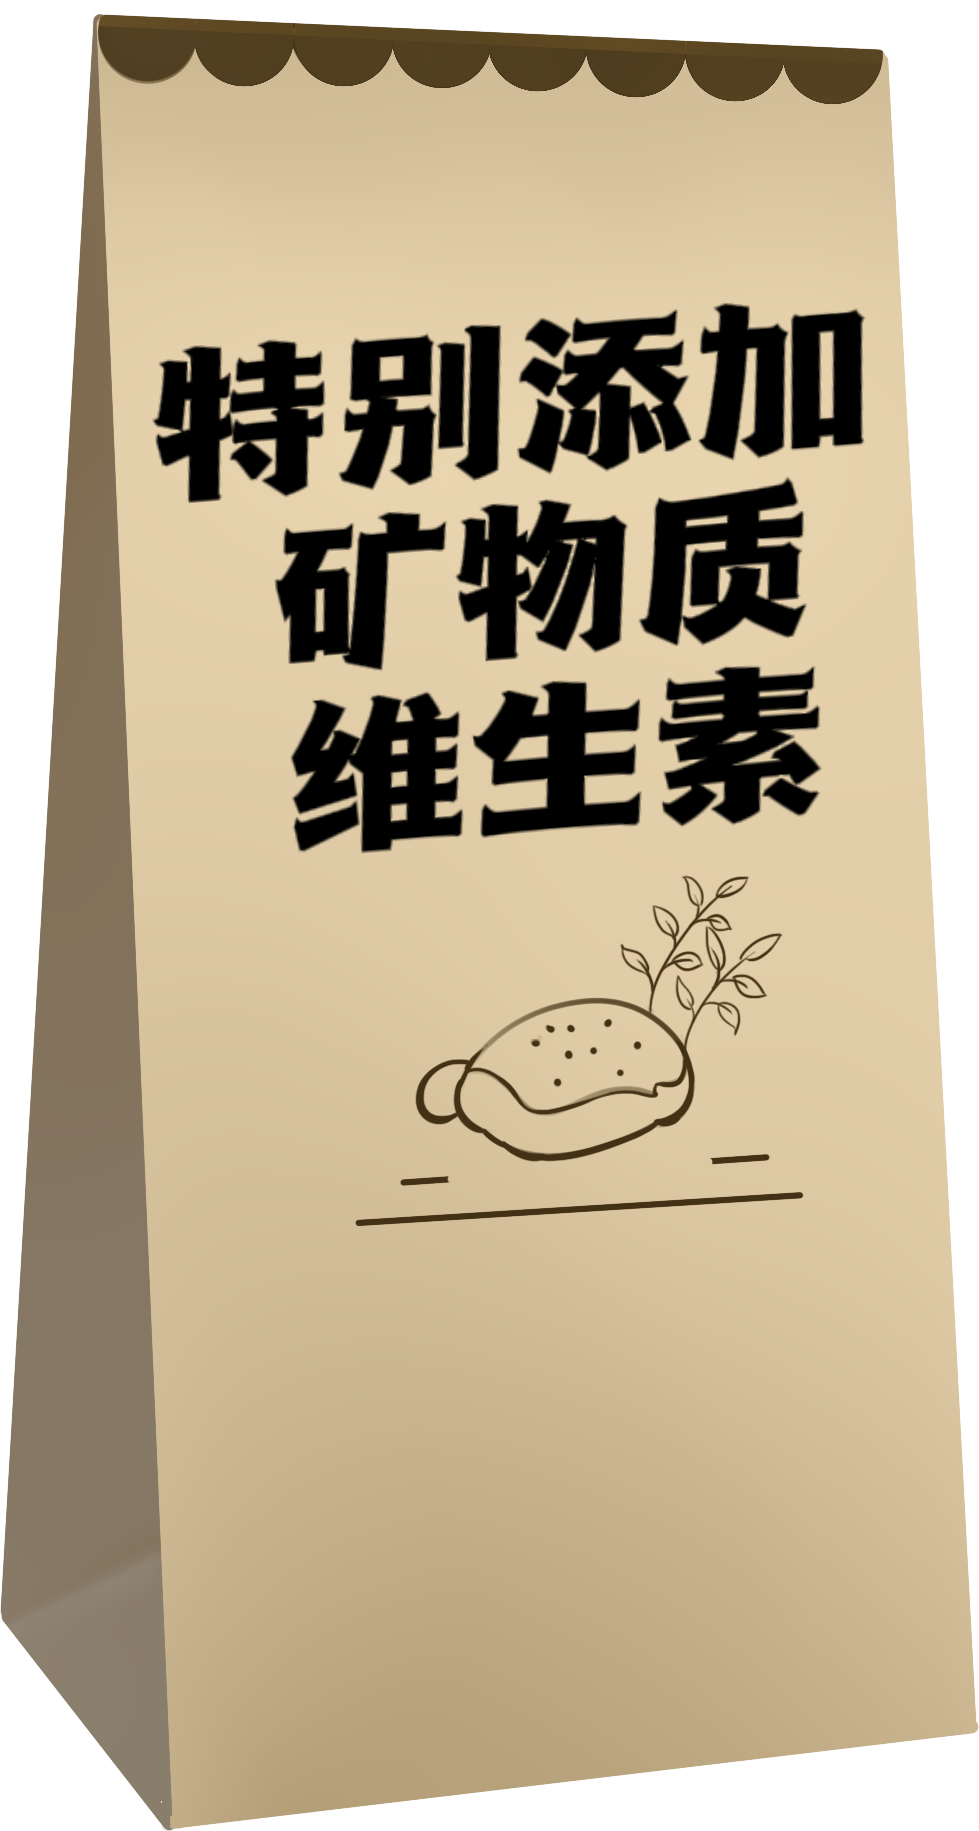 | High Dietary Fiber | 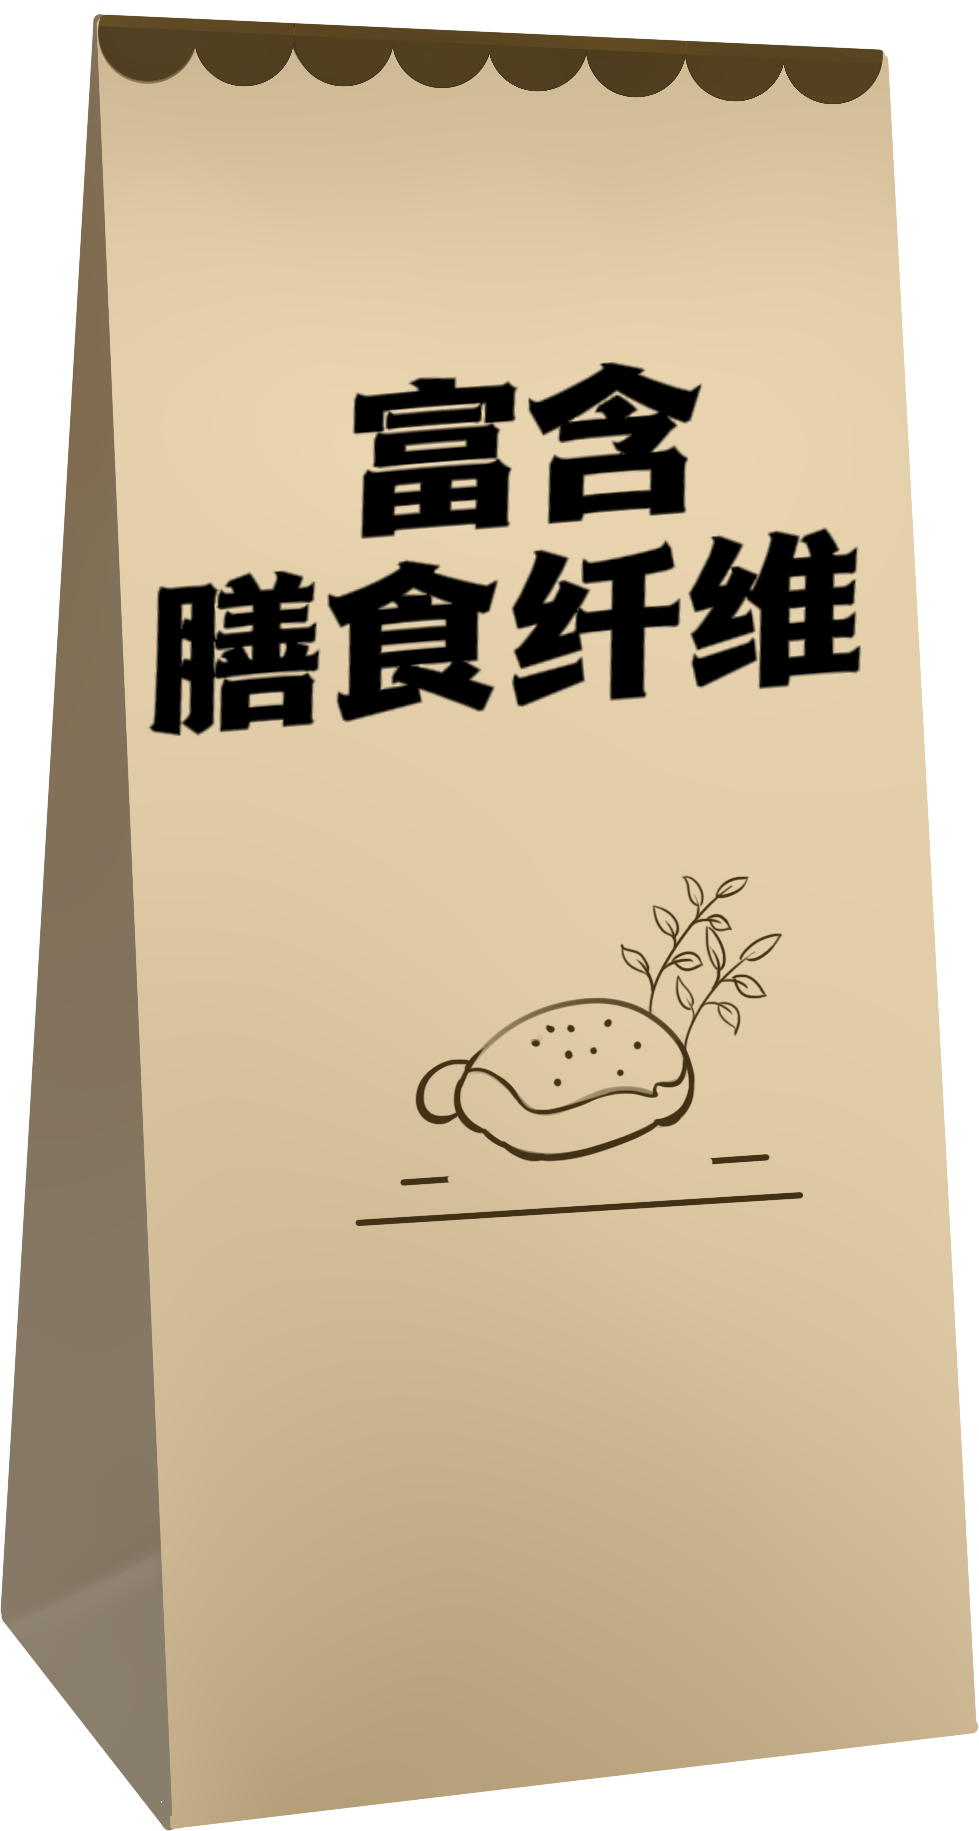 |
| Purchase Location | Convenience  Store | 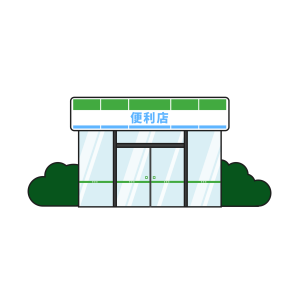 | Supermarket/ Hypermarket | 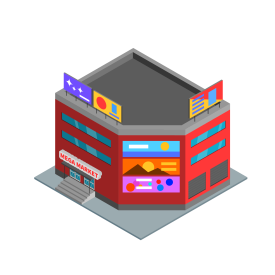 |
| Price | <5 ¥CNY | 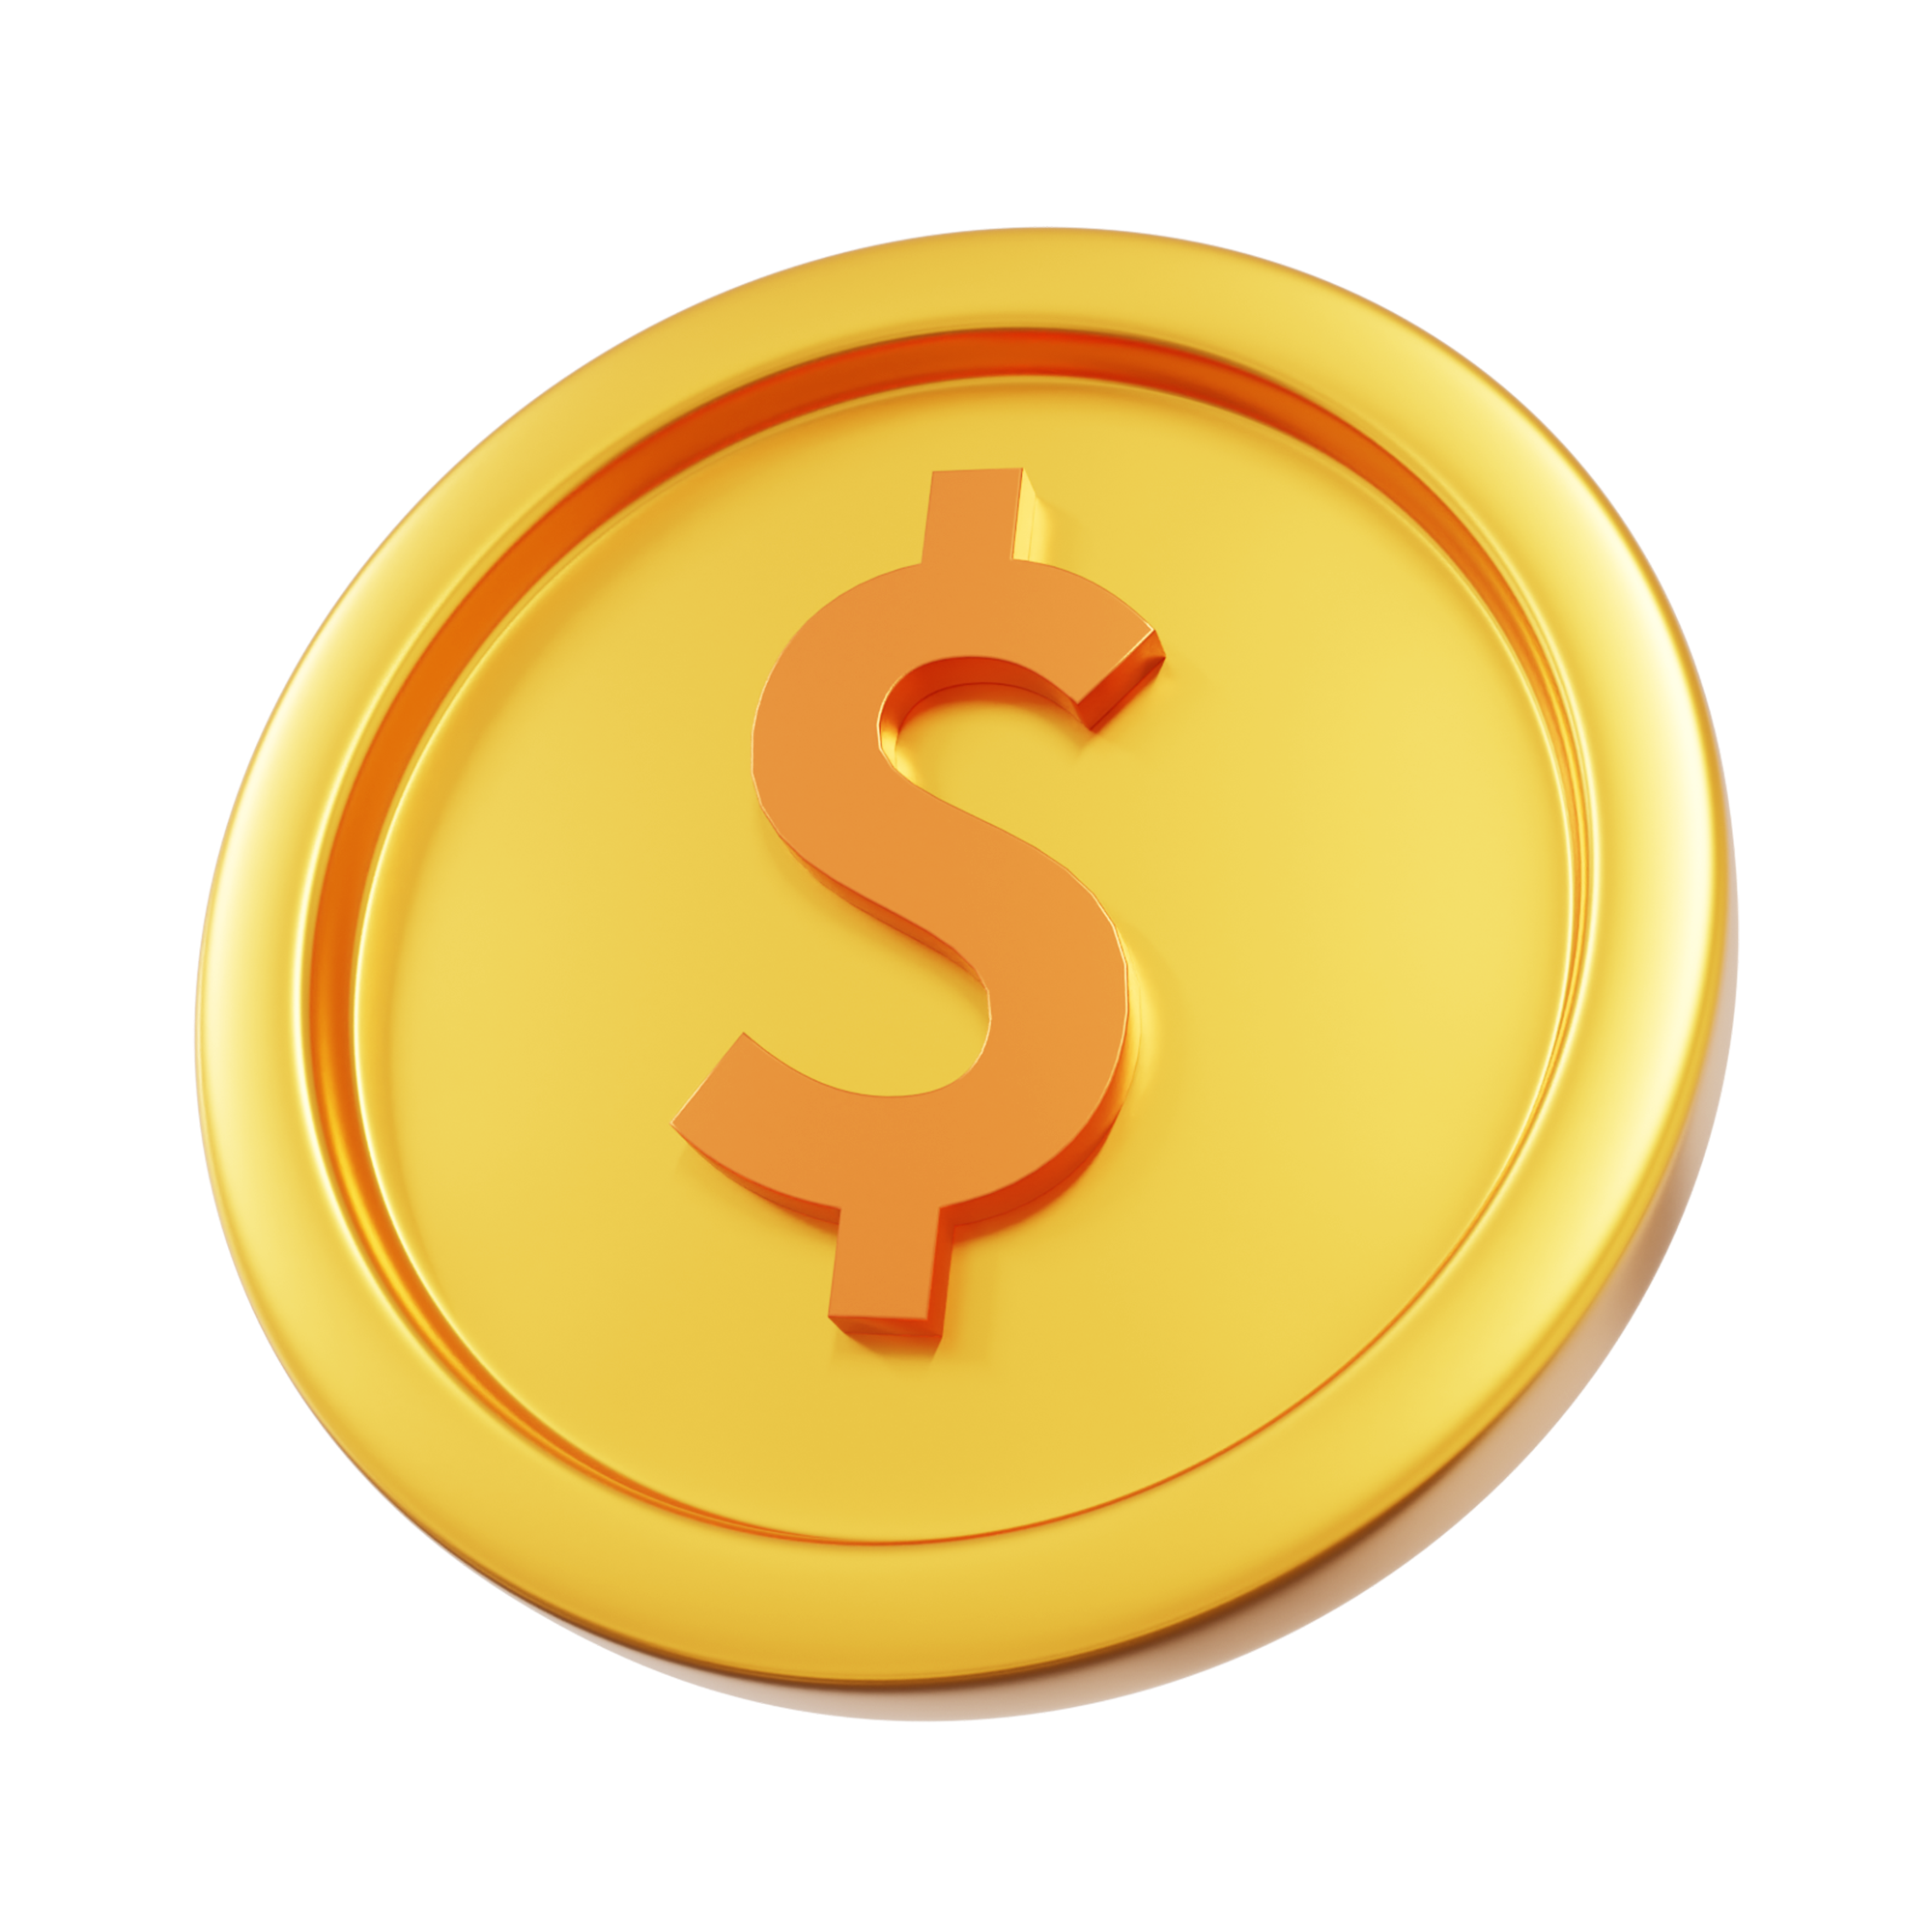 | 5~9 ¥CNY | 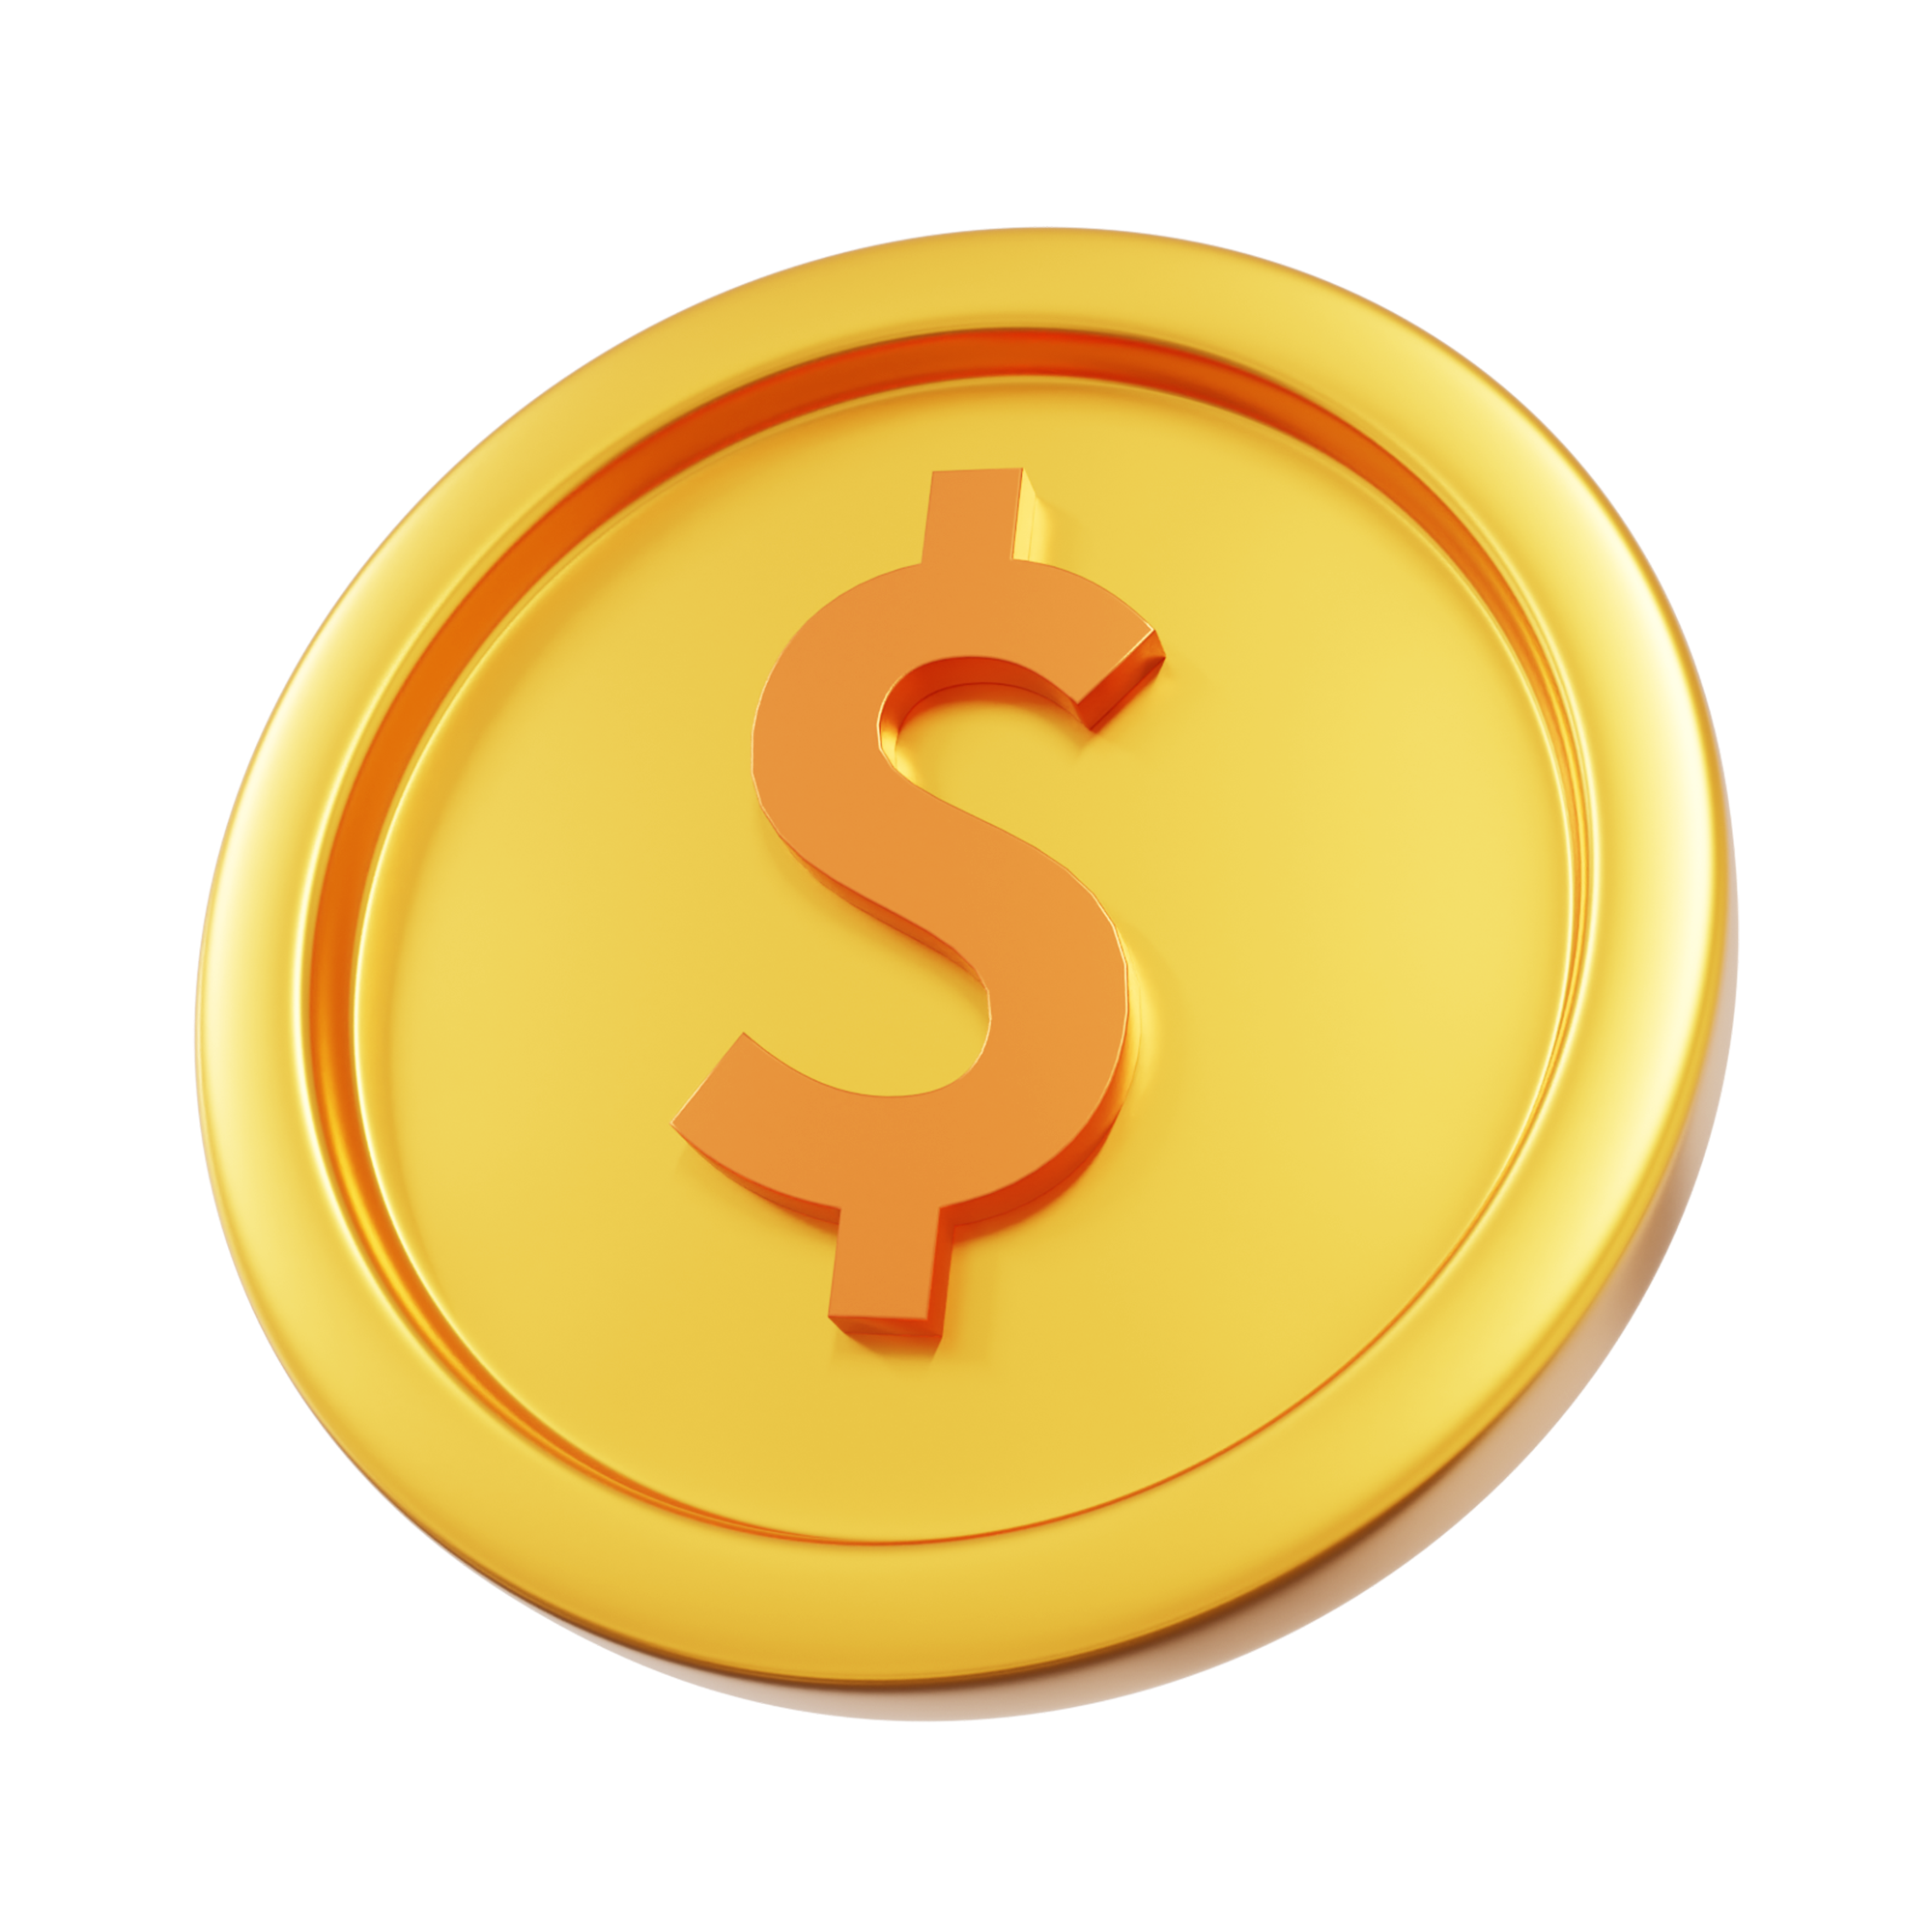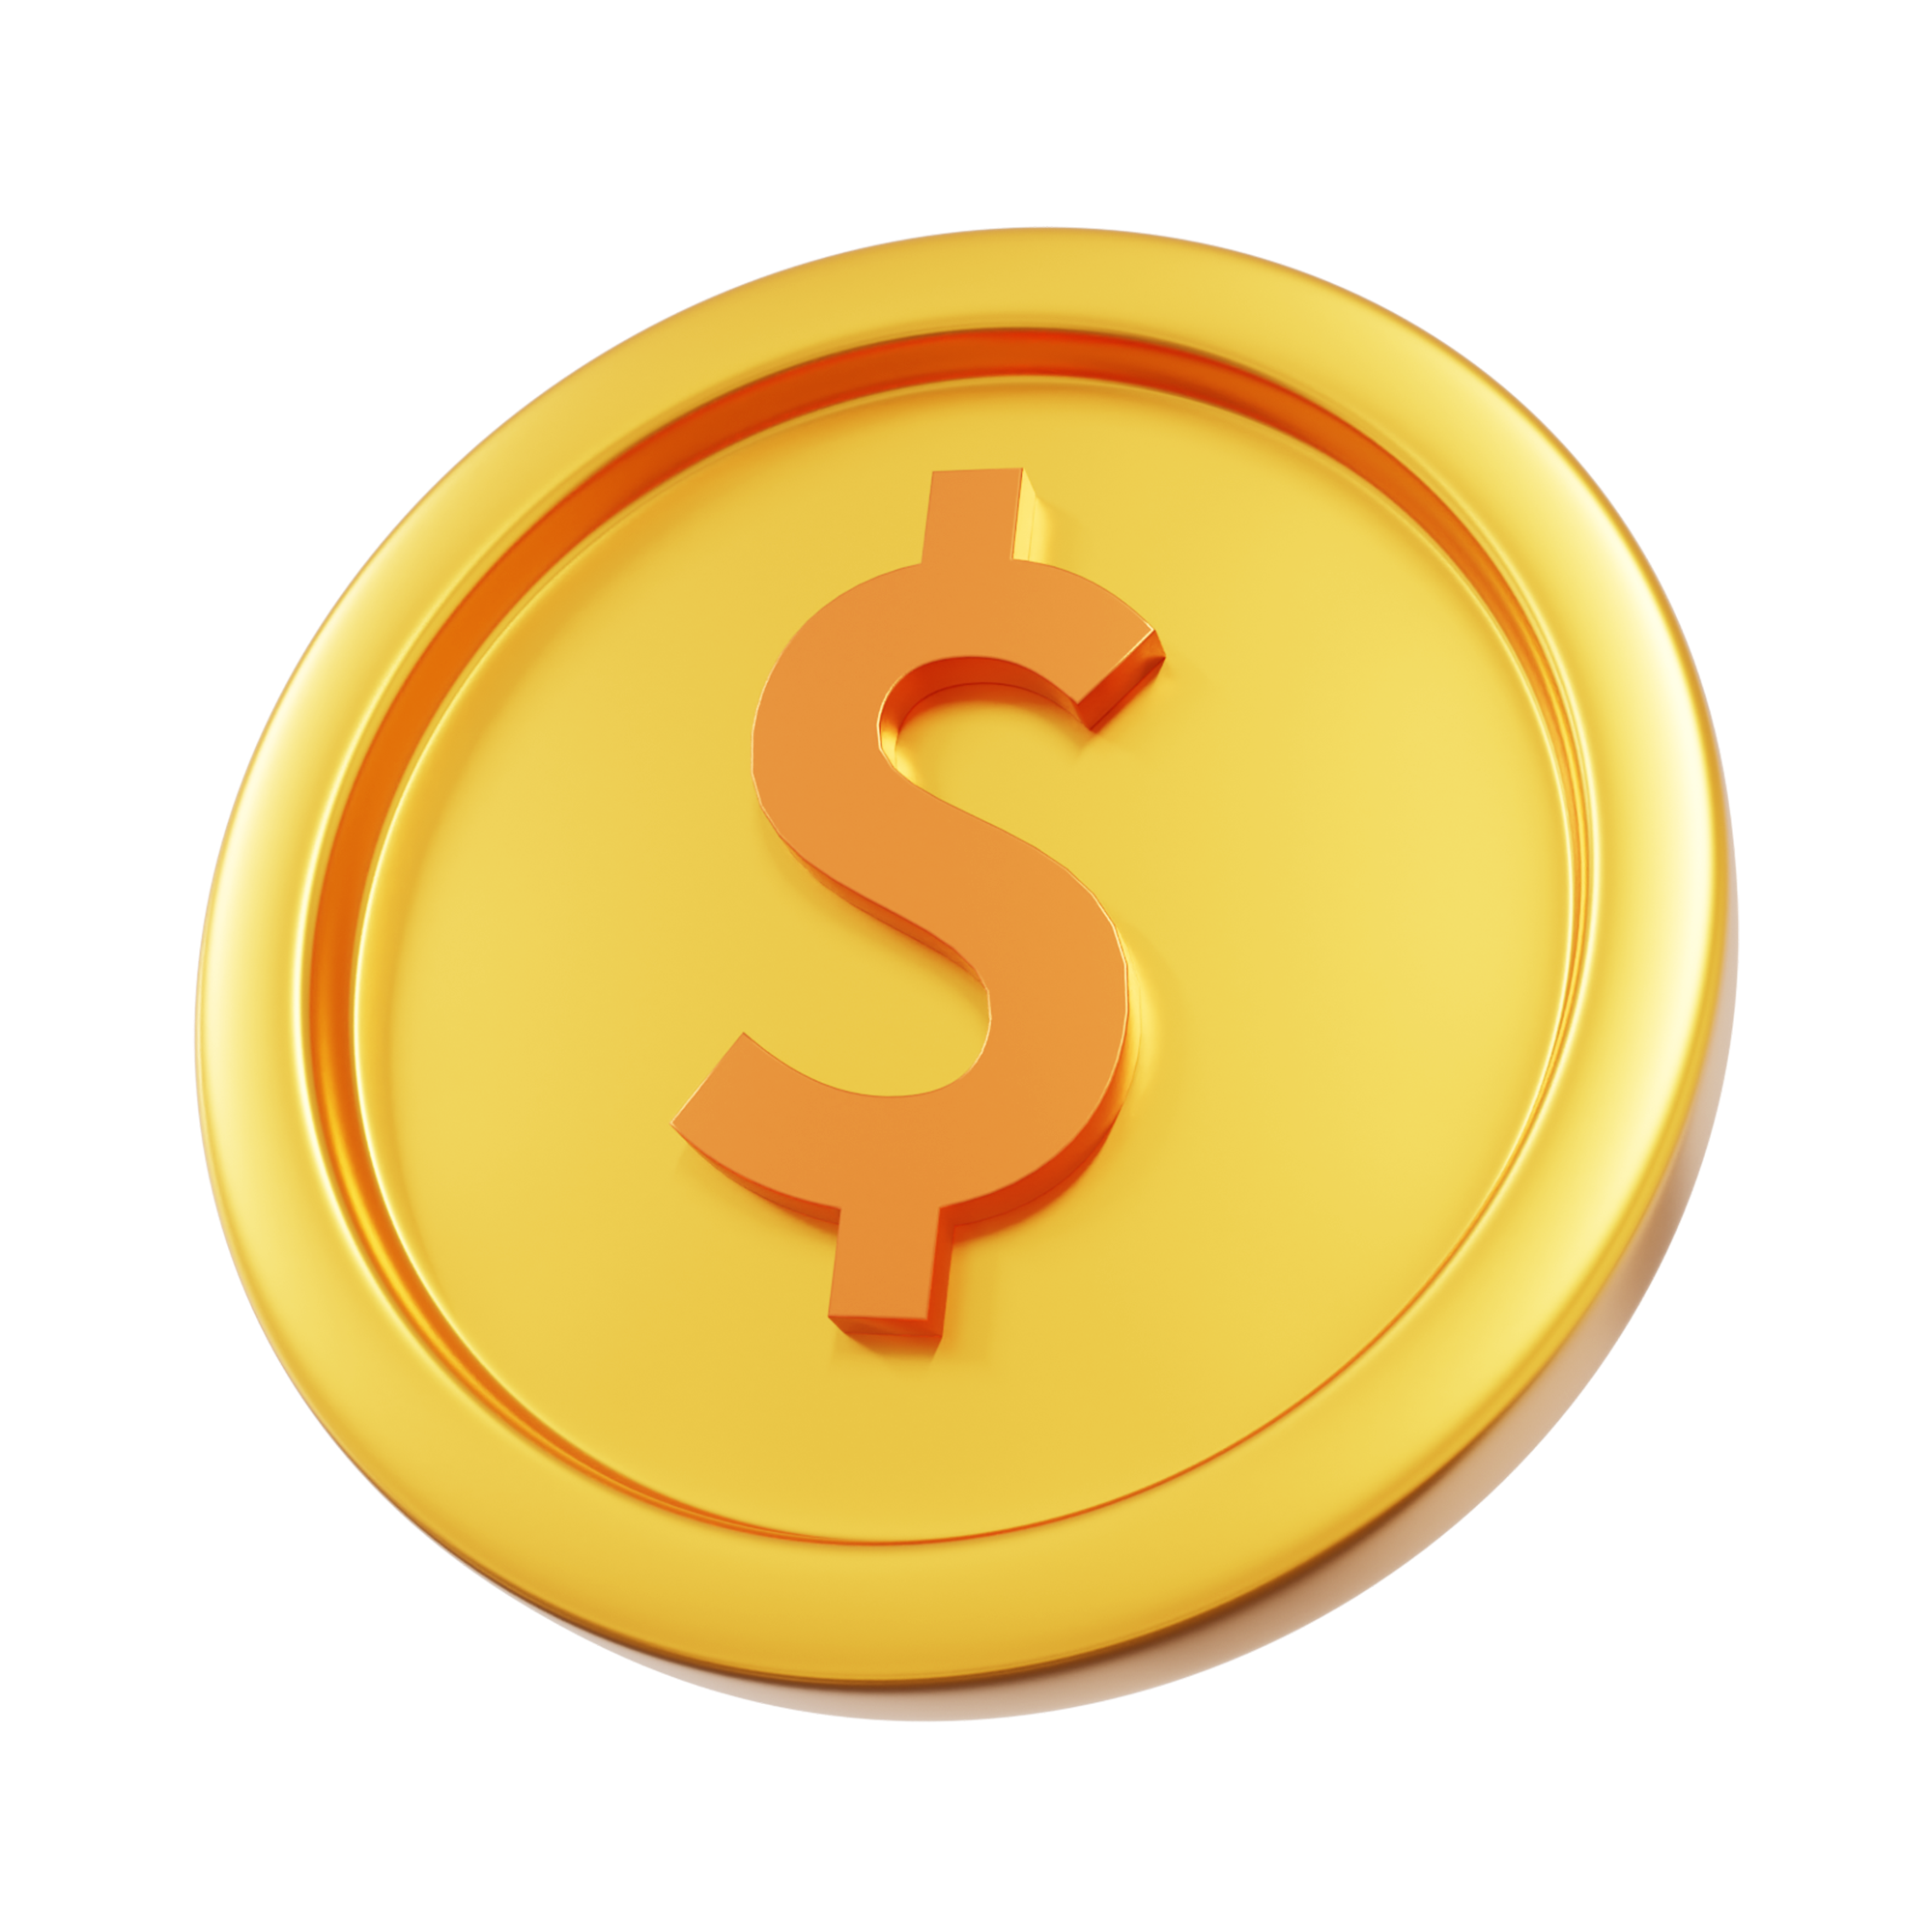 |
| Package Size | Small | 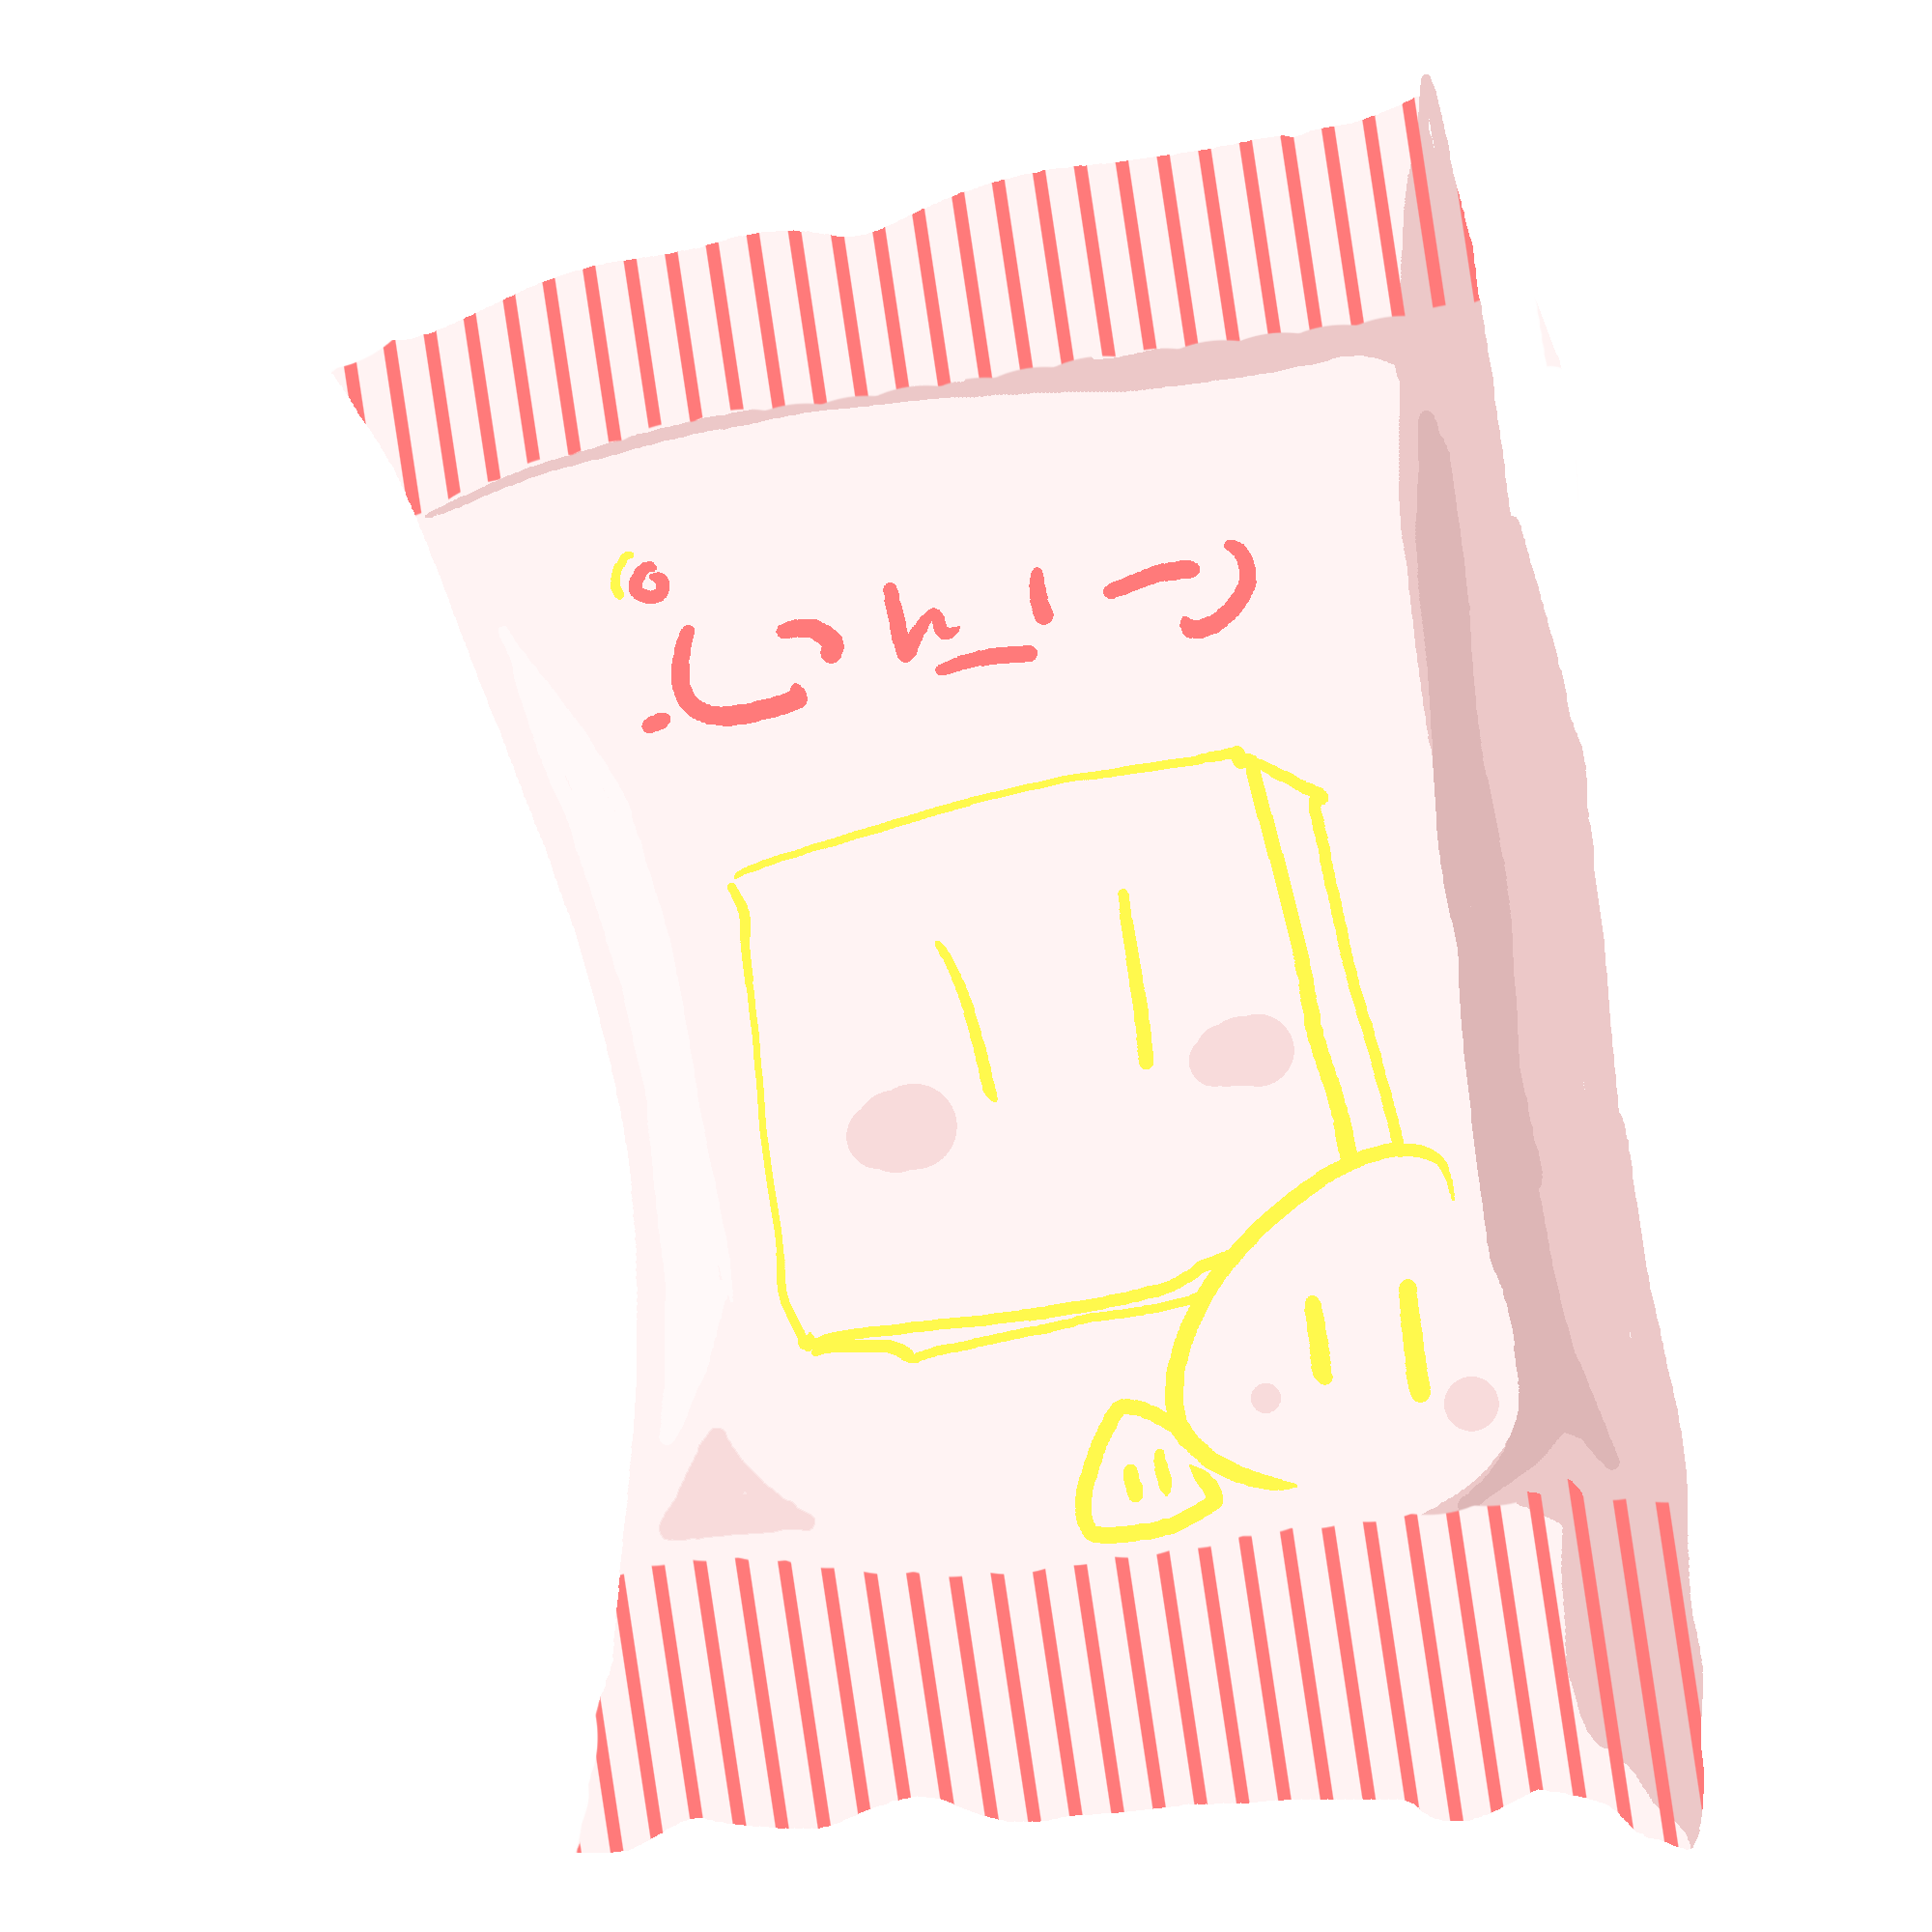 | Large | 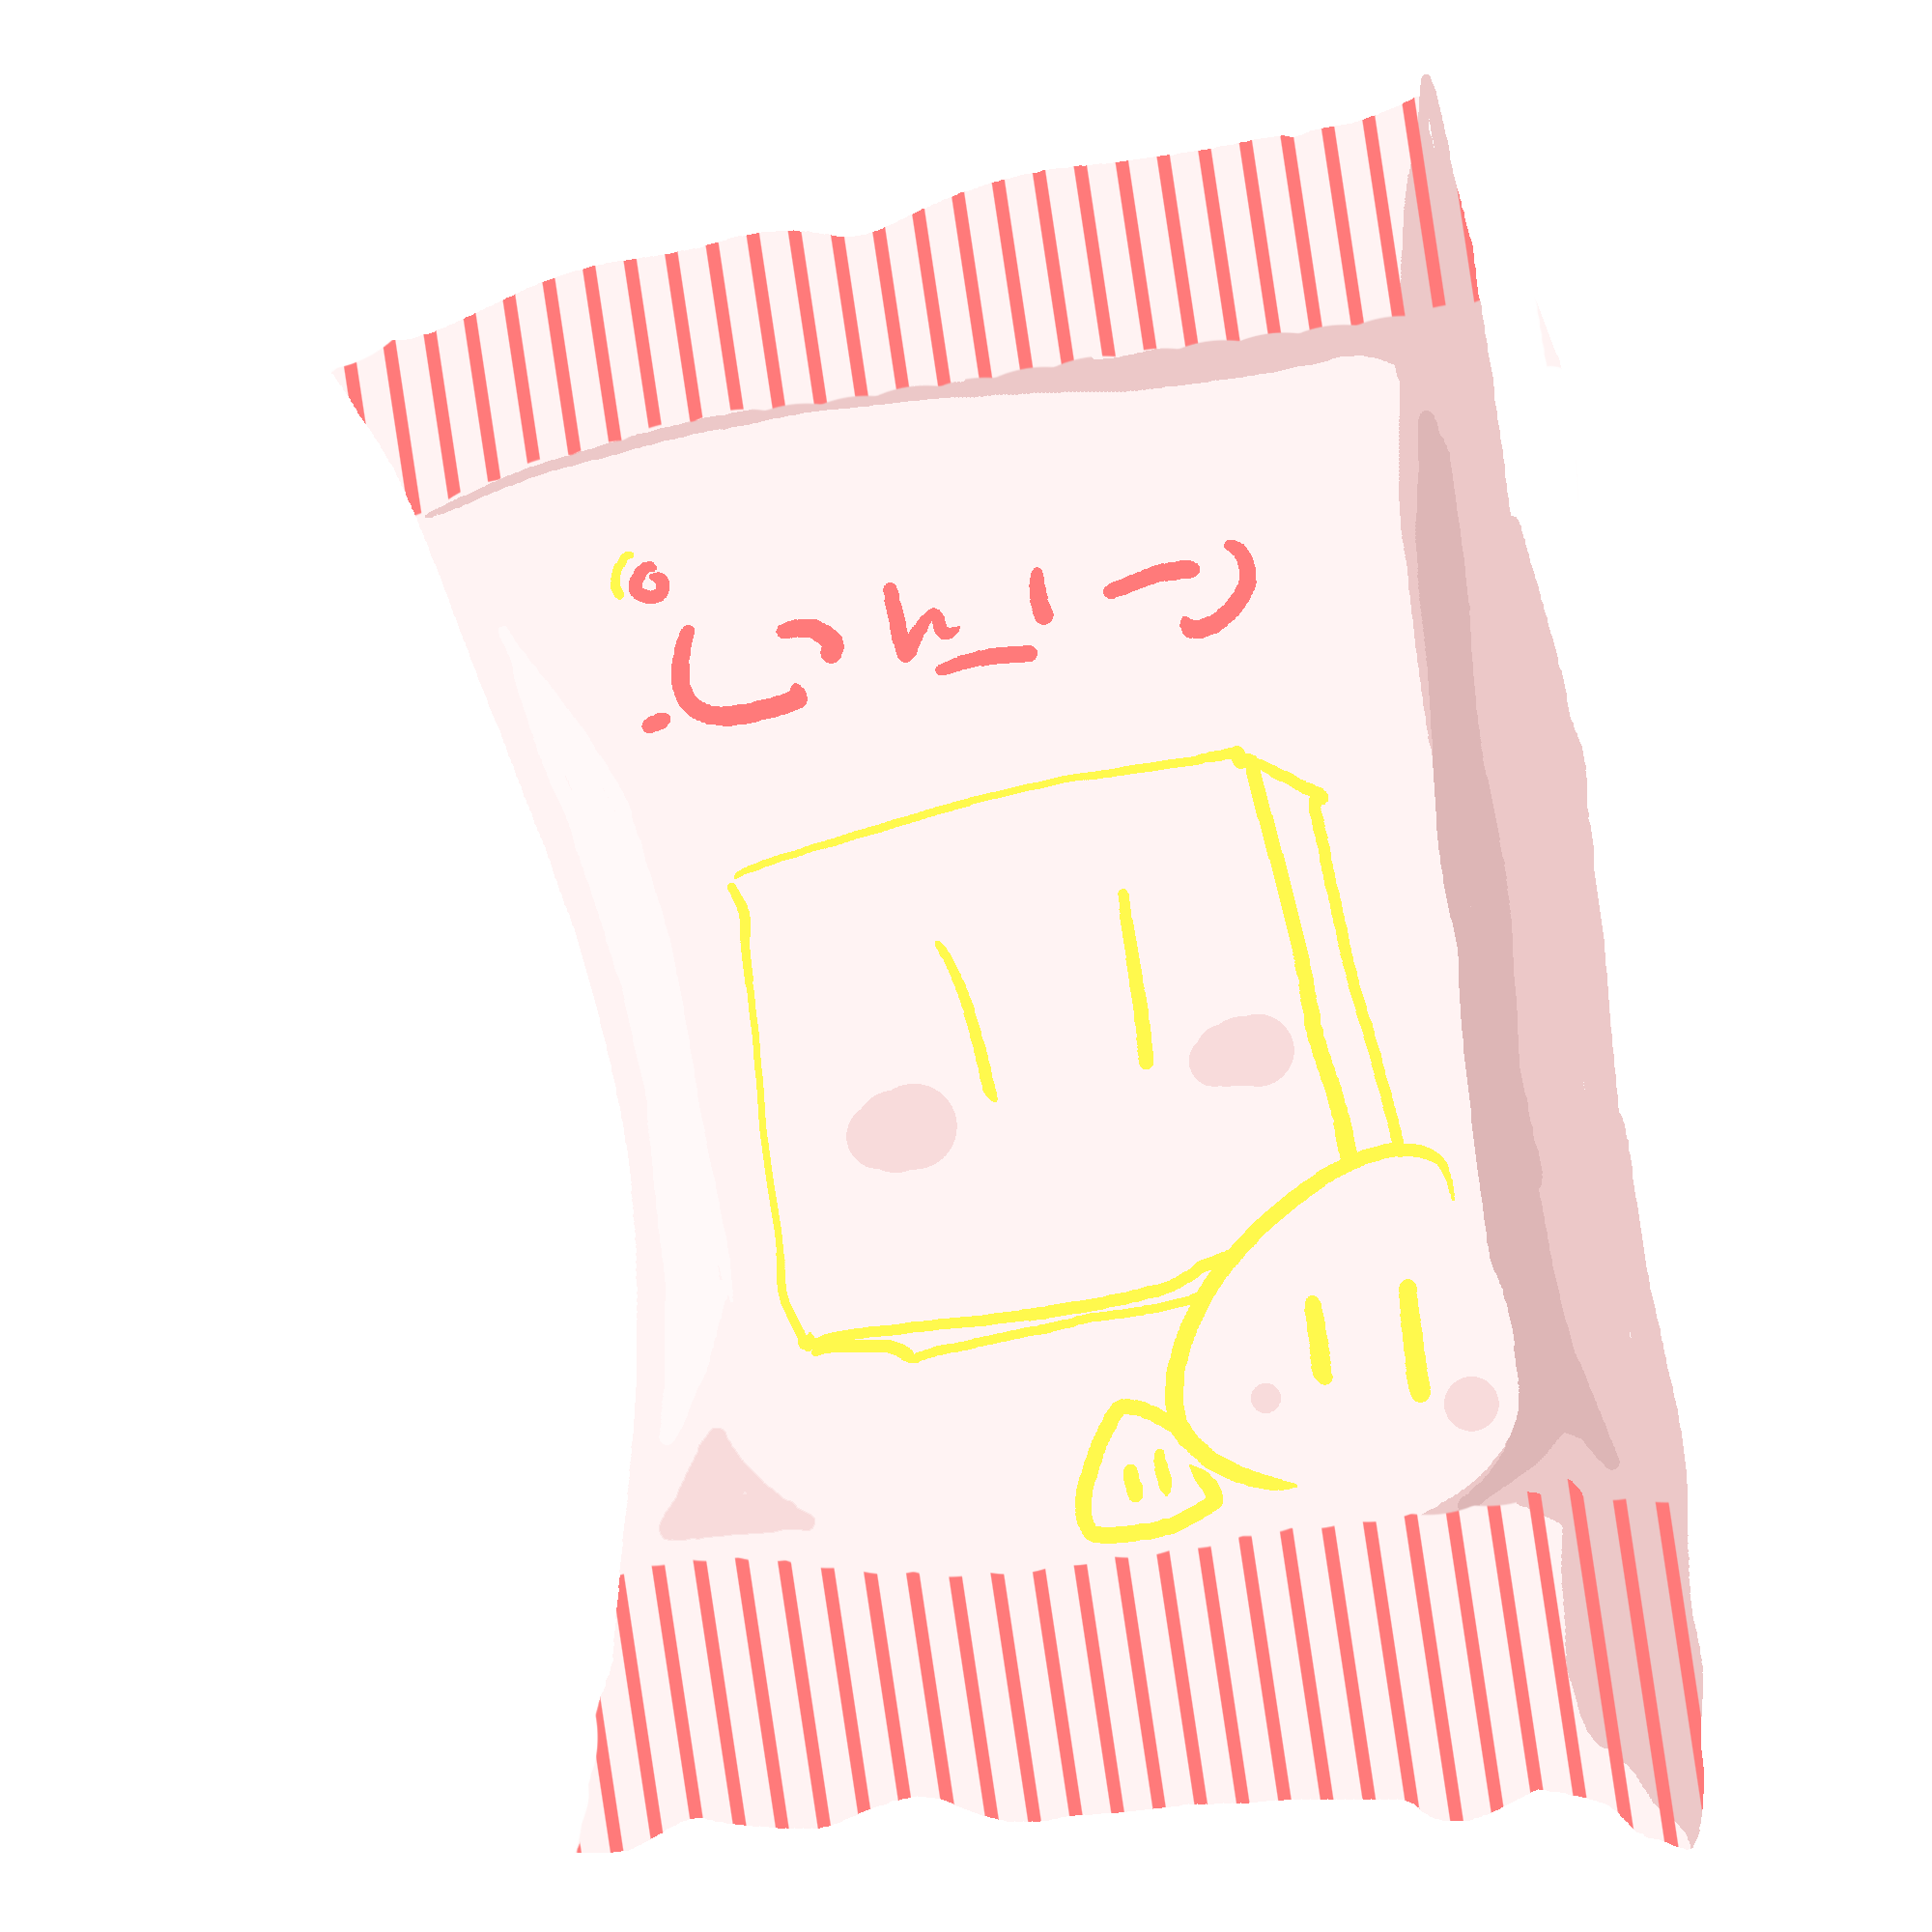 |
| Social Influence | Advertising/ Influencer Recommendations | 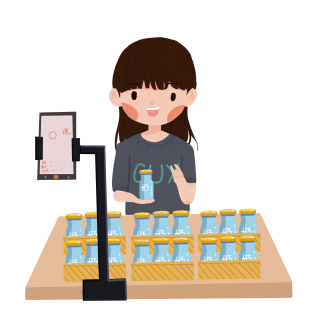 | Family Consumption Habits | 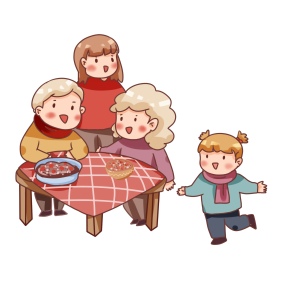 |
| Which option would you be more willing to choose | Snack A □ | | Snack B □ | |
| Considering your daily diet, would you consume this snack in real life?  Yes□ No□ | | | | |

Choice Set 8/8

| Snack Attributes | Snack A | | Snack B | |
| --- | --- | --- | --- | --- |
| Taste | Original Flavor |  | Savory  Flavor |  |
| Nutrient Claims | None |  | High Dietary Fiber |  |
| Purchase Location | Near School |  | Online |  |
| Price | ≥10 ¥CNY |  | <5 ¥CNY |  |
| Package Size | Small |  | Large |  |
| Social Influence | Advertising/ Influencer Recommendations |  | Peer Recommendations |  |
| Which option would you be more willing to choose | Snack A□ | | Snack B□ | |
| Considering your daily diet, would you consume this snack in real life?  Yes□ No□ | | | | |
