# Supplementary material for: Snack Preferences among School-Aged Children: Evidence from Discrete Choice Experiments
Source: Research Square preprint supplement (doi:10.21203/rs.3.rs-8374757/v1), 2026-01-20
Supplement: Supplementary file 2 [file 97699db64761f8515abcb523.docx]

# **Supplementary file 1:**

**ID：□□□**

# Survey on Dietary Preferences and Behaviors of School-Aged Children (Individual Questionnaire Survey)

Dear Studen: Hello!

We are staff members from the Institute of Nutrition and Health, Chinese Center for Disease Control and Prevention.We invite you to participate in a project titled "Survey on Dietary Preferences and Behaviors of School-aged Children." This project is funded by the Chinese Student Nutrition and Health Promotion Association - Mead Johnson Student Nutrition Research Fund.The purpose of this study is to focus on the meal and snack preferences of school-aged children to provide recommendations for developing targeted nutritional intervention policies.The survey data will be collected via questionnaire, and it will take approximately 20-30 minutes to complete. To protect your privacy, personal information in this study will be identified by ID numbers and used only for group data analysis; the data used in the analysis cannot be traced back to personal information. We will not share this information with others. When the results of this study are published, no personal information will be disclosed.

Thank you for participating in our research project. The new knowledge gained through this study will help society or assist in formulating social and public health policies.

**School:** __________ **Grade:** __________ **Class：__________**

### (I)Basic Information

1. Date of Birth: _____ Year _____ Month _____ day

2. Gender:

○ Male ○ Female

1. Parent’s highest education level:

○Junior high school and below ○High school

○University ○Graduate school and above

1. Your primary caregiver is:

○ Parents ○ Grandparents/Maternal Grandparents ○ Nanny or others

1. Do you live on campus?

○ Yes ○ No

1. Do you have group meals at school?

○ Yes ○ No

1. Do you usually have disposable pocket money?

○ Yes (Answer question 7.1) ○ No (Skip to question 8)

**7.1 How much pocket money do you usually have per week?**

○ Less than 10 Yuan ○ 10~49 Yuan ○ 50~99 Yuan ○ 100 Yuan and above

1. Your most recently measured height is: __ __ __.__cm (Keep 1 decimal place)
2. Your most recently measured weight is: __ __ __.__kg (Keep 1 decimal place)

*Note: Keep 1 decimal place. 1 kilogram = 2 jin

1. Do you currently have nearsightedness (myopia)?

○Yes (If yes, answer 10.1) ○No (Skip to question 11) ○Don't know (Skip to question11)

- 1. **Degree of nearsightedness:**

Left eye __.__ Degrees ; Right eye __.__ Degrees

11. Do you have dental caries (cavities)?

○ Yes ○ No ○ Don't know

1. Have you been diagnosed with hypertension by a doctor?

○ Yes ○ No ○ Don't know

1. Have you been diagnosed with hyperglycemia by a doctor?

○ Yes ○ No ○ Don't know

1. Do you know about food nutrition labels?

○ Yes (Continue to question 14.1) ○ No (Skip to question 15)

14.1 **When purchasing pre-packaged food, do you read the nutrition labels?**

○ Always ○ Sometimes ○ Rarely ○ Never

1. In the past week, how many days did you eat breakfast?

○0 days (Never eat) ○1-2 days ○3-4 days ○5-6 days ○7 days (Eat every day)

1. In the past week, how many days did you eat at restaurants/snack stalls?

○ 0 days ○ 1-2 days ○ 3-4 days ○ 5-6 days ○ 7 days

1. In the past week, how many days did you eat food delivery?

○ 0 days ○ 1-2 days ○ 3-4 days ○ 5-6 days ○ 7 days

1. In the past week, how many days did you eat snacks?

○ 0 days ○ 1-2 days ○ 3-4 days ○ 5-6 days ○ 7 days

1. Please recall all food (including drinks) intake from the past day and fill in the table below.

| **Time** | **Did you eat?** | **Name and quantity of food** |
| --- | --- | --- |
| Example: | √Eat ○Did not eat | Whole wheat bread (2 slices)  Milk (1 carton) |
| Breakfast | ○Eat ○Did not eat |  |
| Morning Snack | ○Eat ○Did not eat |  |
| Lunch | ○Eat ○Did not eat |  |
| Afternoon Snack | ○Eat ○Did not eat |  |
| Dinner | ○Eat ○Did not eat |  |
| Evening Snack | ○Eat ○Did not eat |  |
